# Supplementary material for: Determination of circumsolar radiation from Meteosat Second Generation
Source: Copernicus journal article supplement (doi:10.5194/amt-7-823-2014), 2014-03-31
Supplement: Supplementary file 2 [file amt-7-823-2014-supplement.zip]

Archive with 5 entries (5 files):
- readme.pdf
- k_electr_suppl_broad_band_20140227.dat
- k_electr_suppl_broad_band_20140227.nc
- k_electr_suppl_spectral_20140131.dat
- k_electr_suppl_spectral_20140131.nc
