# Supplementary material for: Determination of circumsolar radiation from Meteosat Second Generation
Source: Copernicus journal article supplement (doi:10.5194/amt-7-823-2014), 2014-03-31
Supplement: Supplementary file 2 [file amt-7-823-2014-supplement.zip › k_electr_suppl_broad_band_20140227.dat]

# ice particle habit, effective radius [mu m], half FOV [deg.], k, k_fov_std, max_rel_dev
agg 5 0.266 0.968146045191 8.87881422582e-05 0.00532916138704
agg 5 0.375 0.939085707437 0.000148380770838 0.00826376473226
agg 5 0.5 0.903192079929 0.000214165797201 0.0104905257089
agg 5 0.75 0.836483012331 0.000305120219472 0.0125203857118
agg 5 1.0 0.781793064772 0.00037170635635 0.0113088964446
agg 5 1.5 0.705516429923 0.000485470156384 0.00856493634505
agg 5 2.0 0.656045821303 0.000583593931991 0.00603546122386
agg 5 2.5 0.621667675029 0.000666403329294 0.00483124321766
agg 5 3.0 0.596063416846 0.000734096613625 0.00430714716919
agg 5 4.0 0.55879580588 0.000825685873355 0.00427289375221
agg 5 5.0 0.532141079943 0.00088816567721 0.00547725150123
agg 10 0.266 0.905239271992 0.000171450776549 0.0113319031673
agg 10 0.375 0.847092843214 0.000259815974414 0.0124689607535
agg 10 0.5 0.791192408131 0.000332555992862 0.01137953108
agg 10 0.75 0.712808864026 0.000414224621573 0.00756348294821
agg 10 1.0 0.663284733264 0.000467633438394 0.00388050265061
agg 10 1.5 0.606938818259 0.000561307360866 0.00164335655004
agg 10 2.0 0.574272704944 0.000652121652389 0.000998699132045
agg 10 2.5 0.553027955634 0.000734668480448 0.00166363094319
agg 10 3.0 0.536622384376 0.000807874400907 0.00165105570027
agg 10 4.0 0.510965071083 0.000920707598509 0.00224601534421
agg 10 5.0 0.491232406427 0.00100625053236 0.00483873381553
agg 15 0.266 0.852031822451 0.000261199338999 0.0144351166696
agg 15 0.375 0.779966045782 0.000364934125414 0.0124431974879
agg 15 0.5 0.720681488829 0.000440104112561 0.00798375467583
agg 15 0.75 0.650320192397 0.000545295577826 0.00297516680494
agg 15 1.0 0.611407842134 0.000636340654206 0.00050910126699
agg 15 1.5 0.569576317828 0.000791228634733 0.00215618884762
agg 15 2.0 0.545840504355 0.000907220769441 0.000679831370051
agg 15 2.5 0.530150627535 0.000990262218414 0.0018421450593
agg 15 3.0 0.517076482074 0.00105341092559 0.00234337235927
agg 15 4.0 0.496310977487 0.00113069998443 0.00344305344254
agg 15 5.0 0.478261228776 0.00119098749147 0.00445875419974
agg 20 0.266 0.809996103811 0.000353649017391 0.0161319052216
agg 20 0.375 0.731968647821 0.000484248799584 0.0111282129488
agg 20 0.5 0.675157364878 0.000579156326437 0.00563792804122
agg 20 0.75 0.614254854624 0.000712081394274 0.000412771898285
agg 20 1.0 0.583130759697 0.000818713221691 0.00154114753025
agg 20 1.5 0.55038391609 0.00099138986056 0.00120940399861
agg 20 2.0 0.531736330796 0.00110575417273 0.00031372580464
agg 20 2.5 0.518771757715 0.00118530759414 0.00217300336548
agg 20 3.0 0.507600865963 0.00123417102027 0.00125457956588
agg 20 4.0 0.489145620941 0.00128887599277 0.00295461009473
agg 20 5.0 0.471845491379 0.00134507740022 0.00366144805417
agg 25 0.266 0.776118442911 0.000462035787329 0.0162242198152
agg 25 0.375 0.696601451983 0.000626825687094 0.00903796810276
agg 25 0.5 0.643647509496 0.000736787079926 0.00254116491824
agg 25 0.75 0.591425623231 0.000880750856874 0.000725542542012
agg 25 1.0 0.565576173885 0.000994129277659 0.00138132872713
agg 25 1.5 0.538810814715 0.00116709565786 0.000589590929085
agg 25 2.0 0.523313445023 0.00128227286828 0.00135150718824
agg 25 2.5 0.511868800189 0.00135194256228 0.0020965198748
agg 25 3.0 0.502166973804 0.00140636583353 0.00268088755916
agg 25 4.0 0.484390682217 0.00147223904748 0.003188930584
agg 25 5.0 0.468500162257 0.00152500257172 0.00333254420631
agg 30 0.266 0.749593213013 0.000592511794938 0.0171336746333
agg 30 0.375 0.669440636749 0.000788268853876 0.00728933903902
agg 30 0.5 0.621562417434 0.000897753556677 0.00233607876041
agg 30 0.75 0.575875079607 0.00104603514634 0.00169647514558
agg 30 1.0 0.553248846389 0.00116971185988 0.00241393729731
agg 30 1.5 0.530725376131 0.0013459507654 0.000635927087204
agg 30 2.0 0.517140983632 0.00145620830092 0.000853202739095
agg 30 2.5 0.50693513663 0.00153301960446 0.000675298589369
agg 30 3.0 0.498079741854 0.00155516804344 0.00183305988812
agg 30 4.0 0.481454677724 0.00164742240944 0.00353060173497
agg 30 5.0 0.466081472908 0.0016828741491 0.0034733792577
agg 40 0.266 0.709100654844 0.00089920220901 0.0165406452257
agg 40 0.375 0.631688332512 0.00114053031161 0.00433314957796
agg 40 0.5 0.59132349227 0.00126287002111 0.000871262219702
agg 40 0.75 0.556095971596 0.00139914997073 0.00244150432696
agg 40 1.0 0.53937890273 0.00151322284271 0.00296364207426
agg 40 1.5 0.521164532618 0.00172182210028 0.00245023810455
agg 40 2.0 0.510084917619 0.00182624573363 0.00130672879102
agg 40 2.5 0.501726345681 0.00190812928181 0.00204275387865
agg 40 3.0 0.492909542197 0.00195810869516 0.00146138526106
agg 40 4.0 0.477958148925 0.00210677270998 0.00273756179964
agg 40 5.0 0.463266335522 0.00214518974734 0.00410093035702
agg 50 0.266 0.680139575468 0.0012716969405 0.0148503421315
agg 50 0.375 0.607153743115 0.00153271420852 0.00238303818902
agg 50 0.5 0.572016051161 0.00164804707993 0.000926218408073
agg 50 0.75 0.543777956139 0.00179489773255 0.00198238169587
agg 50 1.0 0.530002291544 0.00190966002067 0.00188137601302
agg 50 1.5 0.514685998233 0.00212540054866 0.000608266150676
agg 50 2.0 0.505321960211 0.00231311291866 0.000905431695997
agg 50 2.5 0.497938613373 0.00235090158079 0.00262741664318
agg 50 3.0 0.489601529119 0.00246962230491 0.00164723373236
agg 50 4.0 0.475734667601 0.00256744397094 0.00367546093725
agg 50 5.0 0.461552181224 0.00267082067552 0.00385988402907
agg 60 0.266 0.657423958852 0.00171446166373 0.0123068034578
agg 60 0.375 0.589321616051 0.00199287868203 0.00337638342393
agg 60 0.5 0.559179223229 0.00209815790696 0.00174536727076
agg 60 0.75 0.53505502417 0.00223539439661 0.000289161144556
agg 60 1.0 0.524269068611 0.00233470266819 0.00314051240156
agg 60 1.5 0.509807596828 0.00258314327216 0.00350753792794
agg 60 2.0 0.502424225603 0.00276653412072 0.00221672932412
agg 60 2.5 0.494425325797 0.0028158295831 0.00106079469041
agg 60 3.0 0.48937884659 0.00299007256107 0.00641489818296
agg 60 4.0 0.473811296702 0.00314059350937 0.00228080570997
agg 60 5.0 0.460210157387 0.00359166573119 0.00609085713695
agg 70 0.266 0.641210605325 0.00213092869182 0.013711756051
agg 70 0.375 0.576237730434 0.00252822979597 0.00398894164852
agg 70 0.5 0.549211720558 0.0025937424075 0.00253310197762
agg 70 0.75 0.529111261729 0.00272251353373 0.00232711185584
agg 70 1.0 0.518552583389 0.00294454309583 0.00154286185901
agg 70 1.5 0.506475725728 0.00307395752257 0.00124369417851
agg 70 2.0 0.499305536713 0.00329100101443 0.00217638261385
agg 70 2.5 0.493383847686 0.00332742712105 0.00487992006601
agg 70 3.0 0.486384940488 0.00349220900503 0.00243202898816
agg 70 4.0 0.4717264112 0.00381657480445 0.00396319651994
agg 70 5.0 0.457647016563 0.00419136370881 0.00372626223692
agg 80 0.266 0.627284555707 0.00268863567347 0.0154762967993
agg 80 0.375 0.565504443884 0.00304572205569 0.0025614757337
agg 80 0.5 0.540463158182 0.003256692376 0.00336452140002
agg 80 0.75 0.523012900578 0.00330207608956 0.000675921331304
agg 80 1.0 0.514142246439 0.00341283085948 0.00237983131299
agg 80 1.5 0.504693674812 0.00354075964395 0.00330115168516
agg 80 2.0 0.49624514051 0.0038973267156 0.00114776357114
agg 80 2.5 0.49202234461 0.0041310346881 0.00691229705072
agg 80 3.0 0.483895550234 0.00427983146873 0.00253163832896
agg 80 4.0 0.471838800147 0.00434085919697 0.00769907251565
agg 80 5.0 0.456454296411 0.00508851481129 0.00668919720961
agg 90 0.266 0.615235270042 0.00317906746668 0.0141374015087
agg 90 0.375 0.557425853247 0.00340463753147 0.00434429253641
agg 90 0.5 0.534622433909 0.00371368428111 0.00185472598141
agg 90 0.75 0.518430648165 0.00389404778623 0.00258164167877
agg 90 1.0 0.511611763141 0.00402060895595 0.00101536890529
agg 90 1.5 0.502115599776 0.00416339539172 0.00040989257828
agg 90 2.0 0.496583328348 0.00446119642365 0.00425598937884
agg 90 2.5 0.48857141005 0.00475855922946 0.00122902957522
agg 90 3.0 0.482332047193 0.00482360182163 0.00192396508622
agg 90 4.0 0.470838367442 0.00495174616101 0.00774038705788
agg 90 5.0 0.455424426148 0.00553009224091 0.00477201873252
col 5 0.266 0.981852776968 4.03848465137e-05 0.00278081087063
col 5 0.375 0.967020987605 6.91733516337e-05 0.00467805591063
col 5 0.5 0.946757146112 0.000109208114916 0.00697536212185
col 5 0.75 0.901507368933 0.000196081572592 0.0105208166103
col 5 1.0 0.857380877625 0.000268842163759 0.0125223983236
col 5 1.5 0.783436114487 0.000369333324459 0.0127419328295
col 5 2.0 0.728698291001 0.000449163361897 0.0109567356958
col 5 2.5 0.688486534016 0.000520949160507 0.00919370137426
col 5 3.0 0.657257931398 0.000588557840635 0.00756073799675
col 5 4.0 0.614082010733 0.000708427341008 0.00590599903106
col 5 5.0 0.58547409802 0.000812609159712 0.00705875802552
col 10 0.266 0.948881626552 8.54694995479e-05 0.00835667783857
col 10 0.375 0.907671353681 0.000142485695153 0.011805569141
col 10 0.5 0.860322305776 0.000208266798082 0.0137708157299
col 10 0.75 0.780378232429 0.000311979258824 0.0136110536482
col 10 1.0 0.721491247052 0.000384918134643 0.01104659968
col 10 1.5 0.64627288599 0.000476087131013 0.00670132083273
col 10 2.0 0.60243127224 0.000546095693764 0.00417745836054
col 10 2.5 0.573980786667 0.000611523460112 0.00327598222856
col 10 3.0 0.554249243524 0.000675697314344 0.00280196547957
col 10 4.0 0.528869856275 0.000797148476484 0.00388349901084
col 10 5.0 0.512698187434 0.00090944072217 0.00513848696849
col 15 0.266 0.904741452303 0.000144561715619 0.0132680920722
col 15 0.375 0.843928240145 0.000224469859337 0.0156610875691
col 15 0.5 0.783305068179 0.000298855323803 0.0144723950016
col 15 0.75 0.696513237065 0.00040200627488 0.00983854061326
col 15 1.0 0.641428879491 0.000481040503212 0.00616444584038
col 15 1.5 0.578384298722 0.000624761768184 0.0011780460944
col 15 2.0 0.544994366239 0.000752094859179 0.000404270037606
col 15 2.5 0.524996481294 0.000859255703136 0.00137919035271
col 15 3.0 0.510473092018 0.000954171163763 0.00134200555029
col 15 4.0 0.492150976106 0.00112143745297 0.0020037400993
col 15 5.0 0.481612578258 0.00125829769875 0.00502442494003
col 20 0.266 0.864730070242 0.000207617445182 0.0164328706985
col 20 0.375 0.792110341592 0.000304081386702 0.0166423224948
col 20 0.5 0.72748291158 0.000383167902247 0.0129815020778
col 20 0.75 0.644214988455 0.000507901140527 0.00707639176968
col 20 1.0 0.595198718658 0.000612168472778 0.00283775696851
col 20 1.5 0.543506809582 0.000787137844143 0.0020529164564
col 20 2.0 0.516369889567 0.000937670856823 0.00076295093069
col 20 2.5 0.500111129877 0.00106629804191 0.0015334794992
col 20 3.0 0.488441012265 0.00116964963019 0.000215204222656
col 20 4.0 0.47437664491 0.00135825123695 0.00146847743716
col 20 5.0 0.46550598349 0.00151023128341 0.00485540113223
col 25 0.266 0.829081589789 0.000274025434949 0.0188993278303
col 25 0.375 0.748867366087 0.0003889729836 0.0156558565496
col 25 0.5 0.683906532505 0.000481517300624 0.0102184033366
col 25 0.75 0.606367793367 0.000624813806807 0.00399822296699
col 25 1.0 0.564075490086 0.000743826216964 0.0013676659122
col 25 1.5 0.519828003504 0.000938397879027 0.000939725413241
col 25 2.0 0.497609935133 0.00110001457548 0.0022983247428
col 25 2.5 0.484265552681 0.00123353176382 0.00269024975899
col 25 3.0 0.474468976016 0.00134883979958 0.000352505674241
col 25 4.0 0.46294999293 0.00155581566353 0.00226145357296
col 25 5.0 0.456298785982 0.00170999352669 0.00528765248559
col 30 0.266 0.79668642158 0.000347976649473 0.0201359565381
col 30 0.375 0.71177323529 0.000488571876242 0.0147762009765
col 30 0.5 0.648401379217 0.000591941568732 0.00857557100728
col 30 0.75 0.577292800788 0.00074678165887 0.00186747152911
col 30 1.0 0.540380204423 0.000874222701731 0.00227189136653
col 30 1.5 0.502128204986 0.00108216254826 0.000883957013359
col 30 2.0 0.483912830443 0.00125113134493 0.00225797898515
col 30 2.5 0.472220655879 0.00140019829492 0.00196159139252
col 30 3.0 0.46401628312 0.00152786855588 0.000262708392499
col 30 4.0 0.455164717582 0.00173393236652 0.00301024865253
col 30 5.0 0.447764831844 0.00191579456913 0.00390640328949
col 40 0.266 0.741331999376 0.000525007378861 0.0214724827126
col 40 0.375 0.651945240992 0.00072113823092 0.0110082477816
col 40 0.5 0.593786213304 0.000844518843328 0.00476801795048
col 40 0.75 0.53508539238 0.00100939421026 0.00123001700394
col 40 1.0 0.505858555962 0.00115300293238 0.0015444755293
col 40 1.5 0.477255278674 0.00139269458797 0.00190228018917
col 40 2.0 0.463673413525 0.00158607681462 0.00131105810945
col 40 2.5 0.455203391867 0.00175101595867 0.000441534798881
col 40 3.0 0.448713728636 0.00190290150375 0.00221947043278
col 40 4.0 0.440811032532 0.00213953497311 0.00366176104788
col 40 5.0 0.437070932871 0.00231418978769 0.00467238611082
col 50 0.266 0.697639060101 0.000747480280126 0.0221193494874
col 50 0.375 0.607507198846 0.00101009727837 0.00812386217155
col 50 0.5 0.555499750736 0.00113269515465 0.00263700041031
col 50 0.75 0.506662889793 0.00131348253413 0.00169273043127
col 50 1.0 0.483311392926 0.00146578276891 0.000882817316965
col 50 1.5 0.460247225161 0.00173313953958 0.00255670314756
col 50 2.0 0.449594919293 0.00194033816104 0.00216604398788
col 50 2.5 0.444062472416 0.0021355914675 0.00171628621622
col 50 3.0 0.439023347205 0.00230337722522 0.00197511892288
col 50 4.0 0.433763541945 0.00254730459143 0.00413089924503
col 50 5.0 0.42831876764 0.00282456222529 0.00204041920403
col 60 0.266 0.662795405292 0.00101547038654 0.0226399640922
col 60 0.375 0.574990063511 0.00132214010198 0.00722958233758
col 60 0.5 0.52830322085 0.00147187658634 0.0014461656907
col 60 0.75 0.486971768329 0.00164060474745 0.00305052666669
col 60 1.0 0.467790058662 0.00180585807353 0.00230378121291
col 60 1.5 0.448922119959 0.00211660450636 0.00215448519785
col 60 2.0 0.440926591356 0.00235110796352 0.0013882387931
col 60 2.5 0.434294162606 0.00257835789932 0.00301754539381
col 60 3.0 0.431889248838 0.00270670633875 0.00241301635798
col 60 4.0 0.426759887488 0.0030327470566 0.00270719926501
col 60 5.0 0.423043167163 0.00329776284859 0.00460397385172
col 70 0.266 0.634801015259 0.0013408389589 0.0224237913055
col 70 0.375 0.55033220905 0.00169735507861 0.00665016404686
col 70 0.5 0.50715750357 0.00185285059497 0.0015074890264
col 70 0.75 0.47213456058 0.00201811949574 0.00237951633845
col 70 1.0 0.455895652623 0.00220522912929 0.00180540188874
col 70 1.5 0.440425378764 0.00249896924092 0.00193549754005
col 70 2.0 0.433935237916 0.00276867732163 0.00185497173558
col 70 2.5 0.428558810202 0.00303802667158 0.000969604373032
col 70 3.0 0.425609658355 0.00324944193905 0.0023429247389
col 70 4.0 0.419934418875 0.00357423965558 0.00420383723103
col 70 5.0 0.416848127533 0.00395689407334 0.00702307806802
col 80 0.266 0.612557357804 0.00172332621747 0.0227598073334
col 80 0.375 0.52977583996 0.0021343475943 0.00237731162865
col 80 0.5 0.492413751424 0.002280295975 0.000755872023722
col 80 0.75 0.460725852864 0.00249810753861 0.00109671672673
col 80 1.0 0.44663815446 0.00261314727629 0.00237519814275
col 80 1.5 0.434734471301 0.00294962845614 0.00319152091307
col 80 2.0 0.425821280964 0.00339831433892 0.00252294119426
col 80 2.5 0.422968159068 0.00369502995958 0.0010705468336
col 80 3.0 0.420454784772 0.00370844023637 0.00178485701717
col 80 4.0 0.416421722892 0.0041351322223 0.00198494886841
col 80 5.0 0.413347262552 0.00460287312609 0.00110651792748
col 90 0.266 0.592345284311 0.0021408586543 0.0201791717274
col 90 0.375 0.513765526148 0.00253477122996 0.00456879608791
col 90 0.5 0.47964632767 0.0026928897744 0.00199393184953
col 90 0.75 0.451860312367 0.00288060369075 0.00119827676432
col 90 1.0 0.440033024865 0.00307153309386 0.00172564547329
col 90 1.5 0.429268418601 0.00337137657938 0.00334716373326
col 90 2.0 0.423423422946 0.00365862510851 0.000386341116972
col 90 2.5 0.419125989531 0.00404776471605 0.00260613426511
col 90 3.0 0.416148787755 0.00438274153765 0.000429150792167
col 90 4.0 0.411700992055 0.00491623928958 0.00351539188963
col 90 5.0 0.40919649347 0.00525132917108 0.00772771826279
dro 5 0.266 1.04334721662 2.90328454999e-05 0.00214071432505
dro 5 0.375 1.0326147163 4.73452056616e-05 0.00355893597252
dro 5 0.5 1.01725159889 7.61728897917e-05 0.005412745472
dro 5 0.75 0.980453533798 0.000146446570401 0.00910237908084
dro 5 1.0 0.940939896849 0.000215516445223 0.0114312463786
dro 5 1.5 0.868340537314 0.000311702507372 0.0132433136389
dro 5 2.0 0.809653783656 0.000382710374325 0.0120934336464
dro 5 2.5 0.764062747309 0.000447704819111 0.0108582835882
dro 5 3.0 0.728442798553 0.00051109559452 0.00940437676497
dro 5 4.0 0.676794427116 0.00062827915419 0.00851661566762
dro 5 5.0 0.641638111683 0.000724013701031 0.00930770083345
dro 10 0.266 0.97048883875 5.51872537086e-05 0.0058686449088
dro 10 0.375 0.939756360714 9.74811845083e-05 0.00869185727791
dro 10 0.5 0.90206639904 0.000153089495359 0.0114745918591
dro 10 0.75 0.831268203906 0.000250843820553 0.0124204278891
dro 10 1.0 0.774051539069 0.000321561382746 0.0107099576336
dro 10 1.5 0.696334907481 0.000404648785118 0.00671896075666
dro 10 2.0 0.64863929454 0.000459906895993 0.0043685113849
dro 10 2.5 0.617028623558 0.000513389721091 0.00293300151479
dro 10 3.0 0.594774122186 0.000567518069627 0.00283177437622
dro 10 4.0 0.565112305389 0.000676999968098 0.00358111642391
dro 10 5.0 0.545771105268 0.000773695199058 0.00547002300048
dro 15 0.266 0.929153332398 9.4633824844e-05 0.00965210168604
dro 15 0.375 0.880138734288 0.000161638717374 0.0124693182982
dro 15 0.5 0.827401523439 0.000231467090772 0.0132713096758
dro 15 0.75 0.745459684923 0.000329159196562 0.0102758357583
dro 15 1.0 0.689990647355 0.000396392651675 0.00637045993194
dro 15 1.5 0.624507716318 0.000522067998082 0.00248307020039
dro 15 2.0 0.587704159882 0.000634898720212 0.000158637821289
dro 15 2.5 0.565636084664 0.00072701120503 0.00129253166298
dro 15 3.0 0.550002667695 0.00081601796197 0.00088241316273
dro 15 4.0 0.530209354036 0.000967194548433 0.0038205626744
dro 15 5.0 0.517121009404 0.00109090020193 0.00600001807617
dro 20 0.266 0.894649500005 0.000141219681213 0.0128444682918
dro 20 0.375 0.832650672634 0.000226458696055 0.0141516951957
dro 20 0.5 0.772796988555 0.000301789019973 0.0121594862835
dro 20 0.75 0.690878828119 0.000415893683971 0.00724002808254
dro 20 1.0 0.641287039586 0.000505735712364 0.0033499797304
dro 20 1.5 0.586569562562 0.000666879064467 0.000553458338399
dro 20 2.0 0.558264804452 0.000807737351718 0.00183146709416
dro 20 2.5 0.540509713837 0.000915927313539 0.000568012699411
dro 20 3.0 0.528923973206 0.00101974982751 0.000614554947158
dro 20 4.0 0.514246917137 0.00118657763163 0.0042592686228
dro 20 5.0 0.503609355019 0.0013196363668 0.00585211387806
dro 25 0.266 0.864530059405 0.000191089018743 0.0151129518861
dro 25 0.375 0.793617578035 0.00029088404511 0.0139605514129
dro 25 0.5 0.731629255259 0.000375260495613 0.0109803966624
dro 25 0.75 0.653691449754 0.000512261306793 0.00434783855668
dro 25 1.0 0.610000040252 0.000621173680818 0.00115240971249
dro 25 1.5 0.563968471342 0.000802073123324 0.0019186636282
dro 25 2.0 0.541490335116 0.00095429582512 0.00298278335179
dro 25 2.5 0.52705570761 0.00107522778836 0.00126097921326
dro 25 3.0 0.517579106159 0.0011903535318 0.00191631501641
dro 25 4.0 0.504598538927 0.00137253333518 0.00260182246484
dro 25 5.0 0.49686987395 0.00150921742449 0.00619576685787
dro 30 0.266 0.837949934018 0.000242811606408 0.016662528225
dro 30 0.375 0.76127227219 0.000360337891847 0.0137915243586
dro 30 0.5 0.69920212099 0.000457183142681 0.00875421255372
dro 30 0.75 0.626809107559 0.000609393101284 0.00236819704145
dro 30 1.0 0.588296158934 0.000731284219702 0.00158994382905
dro 30 1.5 0.548979666502 0.000922446776387 0.00203753661098
dro 30 2.0 0.52875039579 0.00108971834993 0.00113175129375
dro 30 2.5 0.517909578507 0.00121084613256 0.0013430659516
dro 30 3.0 0.509192835028 0.00133722035484 0.00273352397382
dro 30 4.0 0.499581271602 0.00152440934785 0.00316333885167
dro 30 5.0 0.492139234266 0.00167899494139 0.00531752871671
dro 40 0.266 0.793507252016 0.000358005723192 0.0182700593971
dro 40 0.375 0.710864474537 0.000518859620967 0.0119020980698
dro 40 0.5 0.652205812321 0.000635246160518 0.00555975371149
dro 40 0.75 0.590735894448 0.000800481916704 0.00140029569593
dro 40 1.0 0.559977160071 0.00093698689628 0.00189717099559
dro 40 1.5 0.530071831187 0.00114667763534 0.000788320285023
dro 40 2.0 0.515827007902 0.0013220457127 0.00187121016005
dro 40 2.5 0.507488043269 0.0014558426832 0.00233593366828
dro 40 3.0 0.500687241253 0.00159239977038 0.00105673663503
dro 40 4.0 0.492706949152 0.00180915615122 0.00450875816789
dro 40 5.0 0.487006830397 0.00196604431117 0.00659777039955
dro 50 0.266 0.758197111702 0.000494474246034 0.0187262613523
dro 50 0.375 0.673853172211 0.000697398336463 0.00886846978856
dro 50 0.5 0.619873529333 0.000821060455468 0.00344953981696
dro 50 0.75 0.567326070081 0.000987900267578 0.00163853581571
dro 50 1.0 0.542697415397 0.00113096990502 0.00181947879574
dro 50 1.5 0.519097116724 0.00135770309698 0.00114294787228
dro 50 2.0 0.507986123178 0.00153439786827 0.00364739635405
dro 50 2.5 0.500943155413 0.00168552280978 0.00261952021725
dro 50 3.0 0.495787938539 0.00183337409781 0.00420991860925
dro 50 4.0 0.488662505418 0.00209802489057 0.00300736080662
dro 50 5.0 0.483290690512 0.00226493171548 0.00460527528303
dro 60 0.266 0.72984961046 0.000649485165537 0.0186739548706
dro 60 0.375 0.645955560578 0.000887227164644 0.006891433861
dro 60 0.5 0.597222673023 0.0010119114543 0.00116212831894
dro 60 0.75 0.551815873966 0.0011794530177 0.00239981975382
dro 60 1.0 0.531098435194 0.00132464791079 0.00108614712248
dro 60 1.5 0.510779285746 0.00157823716888 0.0012822881553
dro 60 2.0 0.502099339314 0.00177479854961 0.000586704588994
dro 60 2.5 0.495376464692 0.00195714629873 0.00202178255614
dro 60 3.0 0.492665477067 0.00210172658095 0.00452946096613
dro 60 4.0 0.486327674792 0.00234964933308 0.00347226138274
dro 60 5.0 0.482802681706 0.00251505480878 0.00627252396215
dro 70 0.266 0.706220465085 0.00082929767115 0.0177523088638
dro 70 0.375 0.624340498768 0.00109116985294 0.00570445404693
dro 70 0.5 0.579709729136 0.00121218501041 3.60498403981e-05
dro 70 0.75 0.540591766539 0.00137600321384 0.00118708786151
dro 70 1.0 0.522648263657 0.00152744747832 0.00189637346291
dro 70 1.5 0.505897463387 0.00178197618327 0.00067596343951
dro 70 2.0 0.498459405367 0.00199917708935 0.0025858013269
dro 70 2.5 0.492873608215 0.00218738104974 0.00179824522703
dro 70 3.0 0.490449832445 0.00234963618083 0.00439606159179
dro 70 4.0 0.485648133901 0.00259042965598 0.00615984785511
dro 70 5.0 0.480334143829 0.00283475582032 0.00503192723528
dro 80 0.266 0.687638616145 0.0010164496417 0.0176177956545
dro 80 0.375 0.606954127017 0.00130790913342 0.00330980608378
dro 80 0.5 0.56625809163 0.00142917202218 0.000857311637966
dro 80 0.75 0.531968492676 0.00159648262433 0.00215159559838
dro 80 1.0 0.516853822775 0.00174344114471 0.00265809780111
dro 80 1.5 0.501661696693 0.00200784398086 0.00042841242184
dro 80 2.0 0.494570556139 0.00224326467536 0.00222857990837
dro 80 2.5 0.491060641531 0.00243702691056 0.00295931122885
dro 80 3.0 0.487488421164 0.0026116939677 0.00238431808125
dro 80 4.0 0.484032076518 0.00286990720973 0.0060393062352
dro 80 5.0 0.48021122944 0.00307421081078 0.00843029946195
dro 90 0.266 0.670848492805 0.00121208471053 0.0162743021061
dro 90 0.375 0.593195195139 0.00149556870551 0.00353456058177
dro 90 0.5 0.556169655606 0.00163220405951 0.00108345286205
dro 90 0.75 0.524996025508 0.00180056077004 0.0025026373885
dro 90 1.0 0.512022431968 0.00193440785124 0.0012125516225
dro 90 1.5 0.498472090429 0.00225268012537 0.00210750777174
dro 90 2.0 0.491747785416 0.00249800235815 0.00286193341437
dro 90 2.5 0.488443517387 0.002756784711 0.00459429810689
dro 90 3.0 0.484913626709 0.00291434476082 0.00269324121238
dro 90 4.0 0.481683657612 0.00314903792642 0.00247332439621
dro 90 5.0 0.478841016888 0.00353502899118 0.00594012598369
hol 5 0.266 0.974246198266 5.32952039772e-05 0.00336240858342
hol 5 0.375 0.954966402974 9.08766499483e-05 0.00546579584992
hol 5 0.5 0.929360131322 0.000141298164206 0.00773348052982
hol 5 0.75 0.875587786101 0.000237687219494 0.0104874947225
hol 5 1.0 0.826506880163 0.000304962230996 0.0115616861247
hol 5 1.5 0.749097861145 0.00040846648031 0.00931165555285
hol 5 2.0 0.69543574597 0.000499926490516 0.00678905122014
hol 5 2.5 0.658039395026 0.000579925452317 0.00572308224265
hol 5 3.0 0.629467079957 0.000654026315172 0.00438161925931
hol 5 4.0 0.590602509545 0.000783557680363 0.00320554273783
hol 5 5.0 0.565435963313 0.000893191685098 0.00512325614551
hol 10 0.266 0.932421861736 0.000113867717262 0.00932412387412
hol 10 0.375 0.884918798821 0.000181894008649 0.0122428860763
hol 10 0.5 0.833319790804 0.000250111058923 0.0128425678065
hol 10 0.75 0.752089259961 0.000349207315088 0.010491435706
hol 10 1.0 0.696029972539 0.000408839524421 0.00749115334446
hol 10 1.5 0.628046055793 0.000495424718485 0.00376313702549
hol 10 2.0 0.589027524148 0.000575070176094 0.0013145166708
hol 10 2.5 0.564676979641 0.000649054744178 0.00124037622291
hol 10 3.0 0.548062135039 0.000719339993974 0.00149299695203
hol 10 4.0 0.526242829449 0.000853173473229 0.00336140308466
hol 10 5.0 0.512354627002 0.000970208204234 0.00534343257537
hol 15 0.266 0.884703872041 0.000183973917305 0.0135792223456
hol 15 0.375 0.819953949604 0.000271278019884 0.0142220748186
hol 15 0.5 0.759562865267 0.000342809062895 0.0118198237524
hol 15 0.75 0.678057737704 0.000443918592754 0.0061796506851
hol 15 1.0 0.628967552517 0.000526489281248 0.00278186044263
hol 15 1.5 0.575094148642 0.000672126804668 0.00137525623396
hol 15 2.0 0.546640121685 0.000803003983497 0.00163700437092
hol 15 2.5 0.528750287253 0.000916210903351 0.00136639155836
hol 15 3.0 0.517189059513 0.00100821071287 0.0014489865723
hol 15 4.0 0.501384264265 0.00117430111678 0.00208977603002
hol 15 5.0 0.490738498471 0.00131325296324 0.00418155871427
hol 20 0.266 0.843340405992 0.000257772542848 0.0159025380843
hol 20 0.375 0.768932716077 0.00036059875851 0.013912601442
hol 20 0.5 0.707070729065 0.000441472391766 0.00958933769749
hol 20 0.75 0.632705046831 0.000567179878278 0.00390762315766
hol 20 1.0 0.590412316949 0.000673311058567 0.00125252561626
hol 20 1.5 0.546445804666 0.000847086027882 0.00144198182366
hol 20 2.0 0.523810906807 0.000997201480874 0.00179381422462
hol 20 2.5 0.509890791595 0.0011255032092 0.00155827282017
hol 20 3.0 0.500584659814 0.00122683357111 0.000917263248145
hol 20 4.0 0.488820517339 0.00141191791344 0.00125710204725
hol 20 5.0 0.481193802432 0.00154630079452 0.00504881521394
hol 25 0.266 0.807377698717 0.000337119254193 0.0179026712346
hol 25 0.375 0.726833428847 0.000465307189269 0.0126409798513
hol 25 0.5 0.666919404119 0.000559457985696 0.00763484548508
hol 25 0.75 0.599287162348 0.000699457502942 0.00160036870636
hol 25 1.0 0.563399009304 0.000819051892001 0.000701802511673
hol 25 1.5 0.526891029488 0.00101360826145 0.00123014537377
hol 25 2.0 0.509313155606 0.0011719208282 0.00146363828441
hol 25 2.5 0.498052058527 0.0013051986924 0.000678331526647
hol 25 3.0 0.490058911454 0.00141848644111 0.00107047008259
hol 25 4.0 0.479730542887 0.00161813526286 0.00321394422482
hol 25 5.0 0.474214340619 0.00175476133024 0.00558215887798
hol 30 0.266 0.775386164063 0.000428076780074 0.019094009379
hol 30 0.375 0.692053406033 0.000586322480071 0.0118571072082
hol 30 0.5 0.63430442594 0.000692084246678 0.00533794611553
hol 30 0.75 0.574201976555 0.000840637306014 0.000598835283434
hol 30 1.0 0.543406702283 0.000968211116643 0.00108884235342
hol 30 1.5 0.513373444301 0.00116940655487 0.000924849004556
hol 30 2.0 0.498299708423 0.00134287978714 0.000227009522795
hol 30 2.5 0.488873482932 0.00148319390316 0.00193022427487
hol 30 3.0 0.482105618389 0.00161520226266 0.00259376591246
hol 30 4.0 0.474514843856 0.00181310933087 0.00392477350927
hol 30 5.0 0.468628310654 0.00197744184165 0.00446876004888
hol 40 0.266 0.723184681398 0.000657020215749 0.0196309908851
hol 40 0.375 0.638843609589 0.000878784338326 0.00874750385115
hol 40 0.5 0.587804944038 0.000995088471032 0.00297540842346
hol 40 0.75 0.538748828545 0.00115476785413 0.00196693378555
hol 40 1.0 0.516614476125 0.00129481622661 0.00156023496599
hol 40 1.5 0.493926252946 0.00152659336077 0.00183423359296
hol 40 2.0 0.483351079705 0.00171175977062 0.000622110009184
hol 40 2.5 0.476727021576 0.00188781129652 0.00243879784255
hol 40 3.0 0.471989080086 0.00200270025607 0.00112870592628
hol 40 4.0 0.465069065675 0.00225450914237 0.00293692211581
hol 40 5.0 0.461819912367 0.00239607004808 0.00770567558206
hol 50 0.266 0.684212144638 0.000950745809726 0.0193427644636
hol 50 0.375 0.600845975283 0.00123350985964 0.0052856556014
hol 50 0.5 0.556694344743 0.00134847247764 0.00104975293777
hol 50 0.75 0.518388580284 0.00150002743526 0.00193381468735
hol 50 1.0 0.499265384039 0.00165009809121 0.00150494634461
hol 50 1.5 0.48185811016 0.00190954271003 0.00190200021672
hol 50 2.0 0.473406181421 0.00216537221463 0.0017700529605
hol 50 2.5 0.468366395798 0.0023261589902 0.0014634116134
hol 50 3.0 0.46549337015 0.00249510497679 0.00348114018786
hol 50 4.0 0.45920911129 0.00273435288421 0.0035840800021
hol 50 5.0 0.455810591644 0.00287086127188 0.00401631219802
hol 60 0.266 0.65396316623 0.00131423014505 0.018019273007
hol 60 0.375 0.57434553866 0.00163354288584 0.00301474562959
hol 60 0.5 0.53501385345 0.00175985183619 0.000903773279876
hol 60 0.75 0.502342277309 0.00192944654725 0.00287012063598
hol 60 1.0 0.488185229634 0.00205339664693 0.00114378843221
hol 60 1.5 0.475253691118 0.00232326868143 0.00144767894353
hol 60 2.0 0.467915937593 0.00264975969075 0.00227721698475
hol 60 2.5 0.462687244088 0.00280681777323 0.00232927565224
hol 60 3.0 0.460056703081 0.00306167583911 0.00244183141584
hol 60 4.0 0.454361254994 0.00352774520007 0.00484543568329
hol 60 5.0 0.4504412759 0.00360192414322 0.00363317776987
hol 70 0.266 0.62944836454 0.00173343228672 0.0162265548776
hol 70 0.375 0.553651445893 0.00208501849197 0.00363052868844
hol 70 0.5 0.520497861063 0.00219459810477 0.00163207635227
hol 70 0.75 0.492789581042 0.00235785421289 0.00304083767571
hol 70 1.0 0.479709472117 0.0025095021447 0.000875597666001
hol 70 1.5 0.467557055011 0.00281325222742 0.00209531894004
hol 70 2.0 0.461124536601 0.00311936216471 0.00345033305536
hol 70 2.5 0.457989446794 0.00342900818428 0.00103211575663
hol 70 3.0 0.455993044744 0.00362311316592 0.00696568215883
hol 70 4.0 0.452115957827 0.00396161787722 0.00863781934974
hol 70 5.0 0.446883508323 0.00394466719493 0.00582700867444
hol 80 0.266 0.610124036274 0.00228694036647 0.0165619404854
hol 80 0.375 0.53806853092 0.0025776709241 0.00160718226453
hol 80 0.5 0.507362638923 0.00278893836872 0.00109041769714
hol 80 0.75 0.482595432629 0.00299762646297 0.00323315880354
hol 80 1.0 0.471247828474 0.00311877508842 0.0046072980367
hol 80 1.5 0.462931087032 0.00337413667655 0.00287832450466
hol 80 2.0 0.456905958677 0.00373520800868 0.00184367344135
hol 80 2.5 0.455401798403 0.00393549426027 0.00402352157436
hol 80 3.0 0.452745186191 0.0041617974587 0.00678805650285
hol 80 4.0 0.445643548887 0.00472710548327 0.00625313637764
hol 80 5.0 0.444742227242 0.00435248572975 0.00808468611658
hol 90 0.266 0.593044074393 0.00284299874724 0.0152693004661
hol 90 0.375 0.525952973193 0.00312775248096 0.00465925067886
hol 90 0.5 0.497935487337 0.00326952541715 0.00342569991082
hol 90 0.75 0.475883699236 0.00347503647152 0.00153869429301
hol 90 1.0 0.465431694686 0.00371366075372 0.0035091294629
hol 90 1.5 0.458382807902 0.00391310400698 0.00308796792712
hol 90 2.0 0.454160118191 0.00428804206643 0.00176860687777
hol 90 2.5 0.450042819468 0.00470678749403 0.00154842505788
hol 90 3.0 0.447260328785 0.00497317865089 0.00128101064152
hol 90 4.0 0.442831607242 0.00525475161802 0.00405991563004
hol 90 5.0 0.439912865344 0.00537274631478 0.00734755123125
ros 5 0.266 0.95689567731 0.000119743470241 0.0066008334733
ros 5 0.375 0.922229186639 0.000186110050517 0.00985511607201
ros 5 0.5 0.881316676772 0.00025526864393 0.0120636969164
ros 5 0.75 0.808242433508 0.000349352364914 0.0123729790525
ros 5 1.0 0.751867806276 0.000421479515025 0.0109297663838
ros 5 1.5 0.675986904672 0.000555538059119 0.00667715923666
ros 5 2.0 0.630047545808 0.000672304627151 0.00393907424198
ros 5 2.5 0.599859678322 0.000774156307072 0.00319356696434
ros 5 3.0 0.578829242829 0.000859351139949 0.00271800423389
ros 5 4.0 0.550703961345 0.00100849094991 0.00362422481475
ros 5 5.0 0.53265675584 0.0011255613033 0.00549813767875
ros 10 0.266 0.863969303177 0.000234445219288 0.0145736493956
ros 10 0.375 0.796089291053 0.00033196448759 0.0149976848219
ros 10 0.5 0.734510723753 0.000409969406955 0.0120103546187
ros 10 0.75 0.654087174737 0.000497729026423 0.00651701659271
ros 10 1.0 0.606342245826 0.000558811151723 0.00305255045934
ros 10 1.5 0.554545109963 0.000673757123977 0.00106400205681
ros 10 2.0 0.527939109641 0.000785702492495 0.00133037074246
ros 10 2.5 0.511140741352 0.000891470464122 0.000318410291481
ros 10 3.0 0.5003037058 0.000983804877391 0.000575640049949
ros 10 4.0 0.486584878763 0.00114755198657 0.00397868173973
ros 10 5.0 0.477276043628 0.00128483189364 0.00503853108176
ros 15 0.266 0.794352290174 0.000366703288988 0.0187459128154
ros 15 0.375 0.712133105346 0.000489005515348 0.013266669284
ros 15 0.5 0.650540024501 0.00057393977222 0.00840937135142
ros 15 0.75 0.581479958587 0.000700597436918 0.00195175251276
ros 15 1.0 0.545413768477 0.000806915946052 0.00163137173296
ros 15 1.5 0.508561884807 0.00100554022718 0.00216538782505
ros 15 2.0 0.490524864667 0.00116219520373 0.0010162730653
ros 15 2.5 0.480080829907 0.00130596864881 0.000744863122743
ros 15 3.0 0.472664209506 0.00141790192136 0.000731878766806
ros 15 4.0 0.463754063126 0.00161939762368 0.00415710368102
ros 15 5.0 0.457265040565 0.0017776032838 0.00513267283085
ros 20 0.266 0.741525271523 0.000520989227933 0.0207465214415
ros 20 0.375 0.655146281411 0.000689295720832 0.0113547383188
ros 20 0.5 0.598130554175 0.000799601025542 0.00447458419066
ros 20 0.75 0.540654139234 0.000959664070558 0.00177831363972
ros 20 1.0 0.512427987349 0.00109106834038 0.00248158015841
ros 20 1.5 0.485719085928 0.0013132584103 0.00238210489655
ros 20 2.0 0.471691056164 0.00150464122719 0.000391133248029
ros 20 2.5 0.463975822071 0.0016596271726 0.00127676892842
ros 20 3.0 0.458756128493 0.00178888844437 0.00307042382184
ros 20 4.0 0.452296223092 0.00202702070586 0.00411353488858
ros 20 5.0 0.446691223752 0.00220893707649 0.00539699192262
ros 25 0.266 0.700676516176 0.000718761751269 0.0214407921626
ros 25 0.375 0.614063940364 0.000939859683845 0.00832928247403
ros 25 0.5 0.562382408295 0.00107287694613 0.00221588020175
ros 25 0.75 0.514459176279 0.00125223738335 0.00250231662135
ros 25 1.0 0.492134192983 0.00138507628634 0.00247529319235
ros 25 1.5 0.471932508557 0.00161904496258 0.00384907321484
ros 25 2.0 0.459981863769 0.00184506346879 0.000786097146099
ros 25 2.5 0.453137888192 0.00203787684429 0.0030758323111
ros 25 3.0 0.449271416266 0.00218739506606 0.0025864531758
ros 25 4.0 0.44362261805 0.00243667402591 0.00294689377218
ros 25 5.0 0.439585394222 0.00266600703007 0.00549609228193
ros 30 0.266 0.668154401289 0.000980843868681 0.021804382641
ros 30 0.375 0.583274627766 0.00123331386782 0.00659434635037
ros 30 0.5 0.536784876363 0.00138169016974 0.00103530139274
ros 30 0.75 0.496358633281 0.00156377771101 0.00372844857016
ros 30 1.0 0.478050403725 0.00170469378874 0.0019303404216
ros 30 1.5 0.459356377511 0.00201104414107 0.00155057830248
ros 30 2.0 0.451098863801 0.0022326356067 0.00103681475513
ros 30 2.5 0.445688789822 0.00244206771708 0.00118329072634
ros 30 3.0 0.442467055533 0.00256495531027 0.00197313728898
ros 30 4.0 0.436972142823 0.0029296819723 0.00450251104616
ros 30 5.0 0.434679324846 0.00315070093623 0.00635623193475
ros 40 0.266 0.618507747988 0.00165660701026 0.019584096654
ros 40 0.375 0.53905541159 0.00202577651936 0.00373426764682
ros 40 0.5 0.503374291556 0.00214431361721 0.00240415712344
ros 40 0.75 0.472329071965 0.00230552071504 0.00171079677061
ros 40 1.0 0.459606703662 0.00246810362551 0.00307000504271
ros 40 1.5 0.446907687292 0.00279975159879 0.00487369562028
ros 40 2.0 0.440270255966 0.00308948150261 0.00321713077843
ros 40 2.5 0.435058066921 0.00335005370926 0.00168936728603
ros 40 3.0 0.433191819829 0.0035652283706 0.00311950343726
ros 40 4.0 0.427273451593 0.00403548596899 0.00644001325496
ros 40 5.0 0.426896211454 0.00419661792871 0.0097003587073
ros 50 0.266 0.582267408967 0.00255374354566 0.0171096221993
ros 50 0.375 0.510716012552 0.00293024889924 0.00223906965876
ros 50 0.5 0.480653004495 0.00312541454964 0.00302843217761
ros 50 0.75 0.455868360854 0.00330797854314 0.00249581468845
ros 50 1.0 0.44532267503 0.0034791661726 0.00254640977027
ros 50 1.5 0.435019394173 0.00377414572995 0.00230130054353
ros 50 2.0 0.429036123624 0.00428286589487 0.00590956181061
ros 50 2.5 0.428008441364 0.0045843472915 0.00379532983788
ros 50 3.0 0.426095758174 0.00482006333966 0.00476430023009
ros 50 4.0 0.421167092775 0.00535266924301 0.00499653027605
ros 50 5.0 0.41888690297 0.00561995996229 0.00699008981923
ros 60 0.266 0.557471754758 0.00361180922297 0.0199959379563
ros 60 0.375 0.488316447044 0.00415327993463 0.00142673504792
ros 60 0.5 0.462716133004 0.00446365951001 0.0020196863432
ros 60 0.75 0.442586905608 0.00452192349742 0.00222706149769
ros 60 1.0 0.433925892461 0.0051265405807 0.00281258035404
ros 60 1.5 0.426665693929 0.00512458528894 0.00076733076426
ros 60 2.0 0.421689252895 0.00574676633545 0.00352685225994
ros 60 2.5 0.418865976488 0.006189401089 0.00687394702874
ros 60 3.0 0.418672358808 0.00642070181848 0.00200091871727
ros 60 4.0 0.417388525948 0.00653692062966 0.0106930682852
ros 60 5.0 0.412131393084 0.00752972749597 0.00197975198448
ros 70 0.266 0.532138663699 0.00528291548424 0.0167794970054
ros 70 0.375 0.471545422168 0.00590654139749 0.00315154858506
ros 70 0.5 0.449890552571 0.00570367414818 0.00492999755644
ros 70 0.75 0.432265462193 0.00636437018144 0.00128252027068
ros 70 1.0 0.424220229779 0.00664875113804 0.0069376554163
ros 70 1.5 0.418553669598 0.00683524663389 0.000551504383614
ros 70 2.0 0.413251878282 0.00794963220158 0.00765293769538
ros 70 2.5 0.413017254933 0.00762976824002 0.00437649837883
ros 70 3.0 0.412108662704 0.00785688699866 0.00536576593142
ros 70 4.0 0.407902252992 0.00880646676954 0.00661405175121
ros 70 5.0 0.406464560645 0.0100392393749 0.00603320123273
ros 80 0.266 0.512774540361 0.00644708487067 0.0157849714774
ros 80 0.375 0.456093548801 0.00757487896657 0.00230885773871
ros 80 0.5 0.438008949454 0.00780882564685 0.00290268509354
ros 80 0.75 0.422392888967 0.00842036014385 0.00280683226273
ros 80 1.0 0.414142668839 0.00877093885949 0.00817871340539
ros 80 1.5 0.41196656844 0.00880575005995 0.00432687718943
ros 80 2.0 0.408700936109 0.0102861274781 0.0121114380254
ros 80 2.5 0.404592411391 0.0101593074764 0.00585094179513
ros 80 3.0 0.405688646319 0.0102907282795 0.012777376851
ros 80 4.0 0.406967844467 0.0105666747233 0.0216961193657
ros 80 5.0 0.400405463077 0.0116539641249 0.0050847264315
ros 90 0.266 0.499484023148 0.00805012859186 0.0243889705048
ros 90 0.375 0.440932995191 0.00958593387459 0.00283067704745
ros 90 0.5 0.427313959506 0.0100621985911 0.00191417592618
ros 90 0.75 0.415457656445 0.00960044822613 0.00468111164568
ros 90 1.0 0.40454247076 0.0107660743495 0.00972299131787
ros 90 1.5 0.402704670858 0.0109124433169 0.00474943661054
ros 90 2.0 0.400829547758 0.0114618182882 0.00719644889065
ros 90 2.5 0.400342045291 0.0130616465264 0.00822442093488
ros 90 3.0 0.397457097833 0.0130127704555 0.00160969663798
ros 90 4.0 0.396122987929 0.0140474563074 0.00520641651663
ros 90 5.0 0.389339278117 0.0172624023129 0.00929320926742
bau 5 0.266 1.00410482606 0.000106407178474 0.00267910386404
bau 5 0.375 0.990424644046 0.000149087995324 0.00422434910148
bau 5 0.5 0.973432272795 0.000180660360402 0.00651846970793
bau 5 0.75 0.935495724753 0.000212712812247 0.0110275769629
bau 5 1.0 0.893866775793 0.00022692358775 0.0138556675161
bau 5 1.5 0.812914181904 0.000263456875449 0.013649051433
bau 5 2.0 0.747607186936 0.000331210267403 0.00981173306814
bau 5 2.5 0.700209472343 0.00043259684905 0.00636589832667
bau 5 3.0 0.66567801309 0.00052718715114 0.00407609080947
bau 5 4.0 0.619425619768 0.000656781766942 0.00334604368818
bau 5 5.0 0.589735290718 0.000755109925003 0.00465889985491
bau 10 0.266 0.968738697652 0.000134596797609 0.00383692721313
bau 10 0.375 0.94148147803 0.000202086420581 0.00522222882862
bau 10 0.5 0.913515440516 0.000263015755924 0.00694760826687
bau 10 0.75 0.865110780314 0.000331247561697 0.00985805437374
bau 10 1.0 0.821497275188 0.000349743405419 0.0116958058743
bau 10 1.5 0.744781232196 0.000379605843045 0.0102291822486
bau 10 2.0 0.686377980292 0.000438774329882 0.00619458415526
bau 10 2.5 0.645229012903 0.000534080799596 0.0034295460749
bau 10 3.0 0.616066945613 0.000625332638145 0.00214694919701
bau 10 4.0 0.577406576632 0.0007568673326 0.00153973097485
bau 10 5.0 0.553663869104 0.000860680185165 0.00361573868457
bau 15 0.266 0.913562292308 0.000136033450066 0.00722467482517
bau 15 0.375 0.862835802832 0.000215227267405 0.00744802453079
bau 15 0.5 0.817483674879 0.000295515905252 0.0062835112983
bau 15 0.75 0.756402042235 0.00041646812682 0.00640230611491
bau 15 1.0 0.713085708139 0.000459947347649 0.00590076205193
bau 15 1.5 0.651059690309 0.000509440001506 0.00500344035018
bau 15 2.0 0.606831886893 0.000587860058228 0.00292477794649
bau 15 2.5 0.576415294237 0.000711104772497 0.00159527554432
bau 15 3.0 0.554711460092 0.000826266949887 0.00092183515331
bau 15 4.0 0.527010892008 0.00097081530102 0.00172648779261
bau 15 5.0 0.509187899904 0.00109255351679 0.00328768317818
bau 20 0.266 0.858935926573 0.000195796548608 0.0159521675235
bau 20 0.375 0.782981631042 0.000314042482286 0.0143373968282
bau 20 0.5 0.717008220108 0.000422099556993 0.010490230672
bau 20 0.75 0.63451778416 0.000583884216521 0.00292613997953
bau 20 1.0 0.588974019706 0.00065282890094 0.00261946015582
bau 20 1.5 0.539035297428 0.000720874572904 0.00295089410708
bau 20 2.0 0.512519456261 0.000804431498734 0.00327634754753
bau 20 2.5 0.495604133163 0.000929751714808 0.00164315751126
bau 20 3.0 0.48377205062 0.00105656324428 0.00143447954306
bau 20 4.0 0.470140581351 0.00122586194674 0.00200185388802
bau 20 5.0 0.460513267587 0.00136517086431 0.00347392531594
bau 25 0.266 0.81551751746 0.000301463683486 0.0210096943954
bau 25 0.375 0.727032215386 0.000439482589264 0.0161308383005
bau 25 0.5 0.655924111545 0.000557293298761 0.00911871529025
bau 25 0.75 0.574429681375 0.000743889199282 0.00229352023743
bau 25 1.0 0.532300937325 0.000869928357895 0.0044161388948
bau 25 1.5 0.490795274089 0.00102654110312 0.00357718542897
bau 25 2.0 0.470529575542 0.0011780153143 0.00254439198136
bau 25 2.5 0.458896173871 0.00131650193462 0.00154577718579
bau 25 3.0 0.451814629104 0.00146740388444 0.00308631143493
bau 25 4.0 0.440276139118 0.00168887624105 0.00084333498664
bau 25 5.0 0.433827340666 0.00185743680399 0.00203656143898
bau 30 0.266 0.752542987243 0.00043084576621 0.0230394329183
bau 30 0.375 0.658058298866 0.00059430132115 0.0131616909722
bau 30 0.5 0.592217756709 0.000717613787019 0.0052562438149
bau 30 0.75 0.522910023041 0.000925302447476 0.00384349745059
bau 30 1.0 0.488554203878 0.00108984975885 0.00421080543724
bau 30 1.5 0.454589113566 0.00134434144291 0.00389567236227
bau 30 2.0 0.43860577505 0.00155214482057 0.00267453058566
bau 30 2.5 0.429094171498 0.00170581290686 0.00206439160928
bau 30 3.0 0.423023432715 0.00186765419162 0.00260086618833
bau 30 4.0 0.412730864125 0.00212666896807 0.0023218507126
bau 30 5.0 0.408441826125 0.0023293432069 0.00449534384018
bau 40 0.266 0.658357362312 0.000821463100086 0.0250255619486
bau 40 0.375 0.561849505599 0.00110269375304 0.00783303927987
bau 40 0.5 0.505556424212 0.00125846486687 0.000686489704238
bau 40 0.75 0.45289703036 0.00148917096116 0.00431678577666
bau 40 1.0 0.428970331529 0.00166293909622 0.00449745137197
bau 40 1.5 0.405245982369 0.00195788556359 0.00371553695773
bau 40 2.0 0.393320024932 0.0022632518734 0.00150579237558
bau 40 2.5 0.386519851463 0.00245164858955 0.00233774000472
bau 40 3.0 0.382615216151 0.00262771652484 0.00278951520681
bau 40 4.0 0.376165145446 0.00295738134391 0.00146391180538
bau 40 5.0 0.371020416912 0.00326752193109 0.000834759343812
bau 50 0.266 0.573239455415 0.00146708761557 0.0276174128996
bau 50 0.375 0.478363918613 0.00192434358998 0.00478814314252
bau 50 0.5 0.433005037773 0.0021211699293 0.00502627774373
bau 50 0.75 0.394191795297 0.00240813246212 0.00321261629797
bau 50 1.0 0.378609258247 0.0026207022339 0.00416330240426
bau 50 1.5 0.362875070412 0.00302405078289 0.00322359010387
bau 50 2.0 0.355704610543 0.00332896239081 0.00374003937466
bau 50 2.5 0.350747510793 0.00364445530306 0.00305802266002
bau 50 3.0 0.347489154109 0.00393575998013 0.00302339503875
bau 50 4.0 0.34179284857 0.00430741807334 0.00203830593369
bau 50 5.0 0.340024191733 0.00466840386061 0.00108871417666
bau 60 0.266 0.518971071095 0.00241576342225 0.0274996758508
bau 60 0.375 0.432020428223 0.00299901502338 0.00356664852634
bau 60 0.5 0.394608406086 0.00324182505739 0.00410010915519
bau 60 0.75 0.364157427498 0.00354564702836 0.00536212314508
bau 60 1.0 0.351962135419 0.00391810284217 0.00228822395442
bau 60 1.5 0.339620742388 0.00441244511148 0.00163374059884
bau 60 2.0 0.335348076053 0.00482017901686 0.00467363254512
bau 60 2.5 0.331314010771 0.00524159509704 0.00444855316676
bau 60 3.0 0.3275819912 0.00571014467709 0.00158202698744
bau 60 4.0 0.323989177155 0.00662009203335 0.00429768909341
bau 60 5.0 0.320354871139 0.00685031774376 0.00558700762928
bau 70 0.266 0.514855929886 0.00296913008016 0.0226376162701
bau 70 0.375 0.433050183746 0.00353768921299 0.00249703600604
bau 70 0.5 0.398566202419 0.00377436635872 0.0025619594656
bau 70 0.75 0.371057116653 0.00417700657844 0.00266371389609
bau 70 1.0 0.359816738787 0.00423941612602 0.00456326080009
bau 70 1.5 0.345664224023 0.00486401866659 0.00374916474202
bau 70 2.0 0.340973147961 0.00543923196741 0.00135539312545
bau 70 2.5 0.33778662508 0.00580032459697 0.00329215367807
bau 70 3.0 0.33401189634 0.00621234905531 0.00131756286542
bau 70 4.0 0.331230481375 0.00672681638974 0.00427522224681
bau 70 5.0 0.32787705783 0.00709853901313 0.00642033034628
bau 80 0.266 0.511186840261 0.00336092849536 0.0211974291476
bau 80 0.375 0.434008361757 0.00386886665987 0.00346939686559
bau 80 0.5 0.400991949198 0.00416186426561 0.0048036977289
bau 80 0.75 0.377440759887 0.00448999108627 0.00556579793037
bau 80 1.0 0.364069898294 0.00480179320758 0.00221001142091
bau 80 1.5 0.354548989061 0.00533198116856 0.00451366223535
bau 80 2.0 0.348387283789 0.00568559979916 0.00942099656076
bau 80 2.5 0.342115509523 0.00666457598199 0.00343517713544
bau 80 3.0 0.342491529252 0.00615416773169 0.0079138043778
bau 80 4.0 0.335701371072 0.00743831485663 0.00519330824893
bau 80 5.0 0.332523102591 0.00789424612819 0.00303332583969
bau 90 0.266 0.509802552941 0.00384136757564 0.0199904856529
bau 90 0.375 0.43669590341 0.00433676551355 0.000654171533307
bau 90 0.5 0.40632308692 0.004703783546 0.00624305593046
bau 90 0.75 0.385485403589 0.00469769668933 0.00703101924027
bau 90 1.0 0.37317819654 0.00514822291255 0.0036835525557
bau 90 1.5 0.360917659256 0.0057443116976 0.000704364132474
bau 90 2.0 0.356094274712 0.00617547992402 0.00232079148554
bau 90 2.5 0.353970006821 0.00628378580691 0.00676239954771
bau 90 3.0 0.348463714999 0.00750876868142 0.00136911544148
bau 90 4.0 0.344858629577 0.00796417867916 0.00712034920402
bau 90 5.0 0.338451402033 0.00849862474059 0.00704201159229
b35 5 0.266 0.996770391214 2.57472932609e-05 0.00245153929335
b35 5 0.375 0.984190107567 3.68206018832e-05 0.0043756377494
b35 5 0.5 0.966386758802 5.68928438355e-05 0.00677404869609
b35 5 0.75 0.924012807378 0.000113081197746 0.010838832533
b35 5 1.0 0.879535576922 0.000177277559879 0.0131517466519
b35 5 1.5 0.800853096477 0.000275399505854 0.0132631253717
b35 5 2.0 0.740693890955 0.000358699440083 0.0108883400534
b35 5 2.5 0.695761235684 0.000435971185049 0.00837035082865
b35 5 3.0 0.661935586569 0.000505022864414 0.00745448369747
b35 5 4.0 0.613712418027 0.000622490931668 0.00609107266249
b35 5 5.0 0.580654287284 0.000712247414994 0.00715475032801
b35 10 0.266 0.96391641673 5.63479870697e-05 0.00678935421598
b35 10 0.375 0.928027598866 9.94429818466e-05 0.0101547748583
b35 10 0.5 0.884747294744 0.000154708863758 0.0121238941149
b35 10 0.75 0.80712292322 0.000243538901329 0.0114050480375
b35 10 1.0 0.748154928703 0.000307329211741 0.00889708633876
b35 10 1.5 0.67209531974 0.000420476862466 0.00390683416685
b35 10 2.0 0.627356572225 0.000523836315445 0.00153965867188
b35 10 2.5 0.598451337825 0.00061375730706 0.00146293096662
b35 10 3.0 0.577776541062 0.00069132967773 0.00110700396429
b35 10 4.0 0.549532407828 0.000810430678381 0.00309287973871
b35 10 5.0 0.528996704771 0.000895180137358 0.00464439578774
b35 15 0.266 0.917748301532 0.000127205583651 0.0105262229146
b35 15 0.375 0.861086990417 0.000204150951705 0.0119311989231
b35 15 0.5 0.804696029092 0.00027178728232 0.0107569441929
b35 15 0.75 0.724442251877 0.000373273406409 0.00644344294351
b35 15 1.0 0.67362574298 0.000461349443437 0.00264781612522
b35 15 1.5 0.616483101524 0.000609496250628 0.00151950057034
b35 15 2.0 0.585025302531 0.000730291586513 0.00191492532367
b35 15 2.5 0.564374733106 0.000826307292017 0.000786319031639
b35 15 3.0 0.550211452571 0.000898851244133 0.00190200841735
b35 15 4.0 0.528558531105 0.00100406288771 0.00317826158432
b35 15 5.0 0.512396817353 0.0010723076069 0.00563413337689
b35 20 0.266 0.865221651127 0.000221285959893 0.0136496844038
b35 20 0.375 0.793615031583 0.000325877419272 0.0114202077699
b35 20 0.5 0.733737429443 0.000413511183974 0.00801009144205
b35 20 0.75 0.661415067617 0.000543111907148 0.0028348549961
b35 20 1.0 0.620367595403 0.00064820581728 0.00114522054508
b35 20 1.5 0.577666127549 0.000811597843476 0.00125229885673
b35 20 2.0 0.555753400843 0.000934230119064 0.00199169369954
b35 20 2.5 0.540643798578 0.00102860751965 0.000526380928196
b35 20 3.0 0.530212343721 0.00110033866047 0.00284450124505
b35 20 4.0 0.513352464799 0.00118297731797 0.00431005418733
b35 20 5.0 0.499739620406 0.00123386460013 0.00755605251995
b35 25 0.266 0.801731311393 0.000357418613834 0.0153294223145
b35 25 0.375 0.720949081719 0.000504885918922 0.00928897705442
b35 25 0.5 0.66427992704 0.000617585756949 0.00348572287003
b35 25 0.75 0.605334287735 0.000769556730503 0.00179612153049
b35 25 1.0 0.577022393359 0.000884368688437 0.00265022323032
b35 25 1.5 0.548112203486 0.00106624943779 0.00152326854442
b35 25 2.0 0.533191589161 0.00119447842235 0.00159560051624
b35 25 2.5 0.52231551468 0.00128943477901 0.000599145351143
b35 25 3.0 0.514448361751 0.0013525749391 0.00208105390171
b35 25 4.0 0.500909359871 0.00141511430905 0.00439619248595
b35 25 5.0 0.488122864334 0.00146959576257 0.00408428135206
b35 30 0.266 0.74891140319 0.00054270032433 0.0160846908556
b35 30 0.375 0.666606050314 0.000754669925138 0.00634704075799
b35 30 0.5 0.617172868031 0.000881804276422 0.00063127758138
b35 30 0.75 0.573020277738 0.00103974320064 0.00303472902587
b35 30 1.0 0.551945007232 0.00116452845971 0.00221713691059
b35 30 1.5 0.531013177705 0.00136321752397 0.00236197320166
b35 30 2.0 0.521431672859 0.00147772510918 0.00239960169987
b35 30 2.5 0.513144213106 0.00157136736574 0.00308592793616
b35 30 3.0 0.50515734878 0.00164285269835 0.00150634778439
b35 30 4.0 0.4943469774 0.00168178915506 0.00530848850105
b35 30 5.0 0.48191886454 0.0017316989209 0.00534140266424
b35 40 0.266 0.692576807422 0.00103293032044 0.0131553386076
b35 40 0.375 0.617637763275 0.00129608570894 0.00167985519254
b35 40 0.5 0.580951895152 0.00141056463891 0.00153705480137
b35 40 0.75 0.5498305635 0.00155311916945 0.00191805954986
b35 40 1.0 0.534986237763 0.00169471024393 0.00174921659769
b35 40 1.5 0.520612319091 0.00190559319339 0.00168777165012
b35 40 2.0 0.512131445773 0.00208882455696 0.000705551132212
b35 40 2.5 0.505763722749 0.00213187480408 0.00136513127769
b35 40 3.0 0.50000815818 0.00216975433663 0.00324945256952
b35 40 4.0 0.488494610878 0.0023711802393 0.00341445183288
b35 40 5.0 0.478066825231 0.00228214145223 0.00815799735816
b35 50 0.266 0.660630453847 0.00160118243282 0.0121858663787
b35 50 0.375 0.593488680584 0.00186755850736 0.000618249071863
b35 50 0.5 0.564639517827 0.00197282868993 0.00230823291476
b35 50 0.75 0.539545175673 0.00212001876466 0.00115682182662
b35 50 1.0 0.52806214375 0.00224030981656 0.00108329118308
b35 50 1.5 0.516681090019 0.00244629170373 0.00177326228742
b35 50 2.0 0.509145788501 0.00263904206976 0.00110438450145
b35 50 2.5 0.502299608021 0.00274605569042 0.00033750432972
b35 50 3.0 0.496502605536 0.00304326453366 0.000966960099451
b35 50 4.0 0.486726593728 0.00295112046494 0.00628602250819
b35 50 5.0 0.474520397685 0.0030575288103 0.0074815097792
b35 60 0.266 0.652561058125 0.00213198204679 0.00967641582313
b35 60 0.375 0.592144845337 0.00240244083579 0.00107440000084
b35 60 0.5 0.565339426028 0.00243343776848 0.00077553973512
b35 60 0.75 0.542221251967 0.00263050600539 0.00200678586434
b35 60 1.0 0.530709812632 0.00282826709494 0.000669765894743
b35 60 1.5 0.517340504921 0.00297082165399 0.0026085262139
b35 60 2.0 0.51020705215 0.00322481853982 0.000569171681626
b35 60 2.5 0.503376354404 0.00334262602571 0.000864735466001
b35 60 3.0 0.498723996285 0.00327546060643 0.00489190210135
b35 60 4.0 0.485954410246 0.00374042002049 0.00452253488677
b35 60 5.0 0.474284154101 0.00383073878633 0.0041405931334
b35 70 0.266 nan nan nan
b35 70 0.375 nan nan nan
b35 70 0.5 nan nan nan
b35 70 0.75 nan nan nan
b35 70 1.0 nan nan nan
b35 70 1.5 nan nan nan
b35 70 2.0 nan nan nan
b35 70 2.5 nan nan nan
b35 70 3.0 nan nan nan
b35 70 4.0 nan nan nan
b35 70 5.0 nan nan nan
b35 80 0.266 nan nan nan
b35 80 0.375 nan nan nan
b35 80 0.5 nan nan nan
b35 80 0.75 nan nan nan
b35 80 1.0 nan nan nan
b35 80 1.5 nan nan nan
b35 80 2.0 nan nan nan
b35 80 2.5 nan nan nan
b35 80 3.0 nan nan nan
b35 80 4.0 nan nan nan
b35 80 5.0 nan nan nan
b35 90 0.266 nan nan nan
b35 90 0.375 nan nan nan
b35 90 0.5 nan nan nan
b35 90 0.75 nan nan nan
b35 90 1.0 nan nan nan
b35 90 1.5 nan nan nan
b35 90 2.0 nan nan nan
b35 90 2.5 nan nan nan
b35 90 3.0 nan nan nan
b35 90 4.0 nan nan nan
b35 90 5.0 nan nan nan
