# Supplementary material for: Determination of circumsolar radiation from Meteosat Second Generation
Source: Copernicus journal article supplement (doi:10.5194/amt-7-823-2014), 2014-03-31
Supplement: Supplementary file 2 [file amt-7-823-2014-supplement.zip › k_electr_suppl_spectral_20140131.dat]

# ice particle habit, wavelength [nm], effective radius [mu m], half FOV [deg.], k, k_fov_std, max_rel_dev
agg 400 5 0.266 0.920051821828 5.38953644999e-05 0.011200499487
agg 500 5 0.266 0.942626685723 3.74899060612e-05 0.00897623699253
agg 550 5 0.266 0.950903038535 3.18230048693e-05 0.00611082590129
agg 600 5 0.266 0.957377141629 3.25049521681e-05 0.00435521831282
agg 700 5 0.266 0.967120116907 2.41827259235e-05 0.0061619862749
agg 800 5 0.266 0.973837065378 1.8339495959e-05 0.00554031429257
agg 900 5 0.266 0.978825353922 1.67737584762e-05 0.00309394226368
agg 1000 5 0.266 0.982572269332 1.10096254466e-05 0.013484319091
agg 400 5 0.375 0.865576177213 8.89615674752e-05 0.0124311602564
agg 500 5 0.375 0.899497552712 6.37339018337e-05 0.0112772921321
agg 550 5 0.375 0.912598545087 5.48727989206e-05 0.00859942370408
agg 600 5 0.375 0.923111238129 5.6760597059e-05 0.00687237430183
agg 700 5 0.375 0.939432477094 4.31430853365e-05 0.00868466392088
agg 800 5 0.375 0.951065982876 3.32842813817e-05 0.00783584567454
agg 900 5 0.375 0.959951605546 3.00891349254e-05 0.00399724288398
agg 1000 5 0.375 0.966691941916 2.04995242927e-05 0.015341210223
agg 400 5 0.5 0.807674599317 0.000121194703803 0.0108715855521
agg 500 5 0.5 0.849369277108 9.51989401338e-05 0.0114895257048
agg 550 5 0.5 0.866614519004 8.30127413947e-05 0.00957892756314
agg 600 5 0.5 0.880678674938 8.68374306041e-05 0.00828246591321
agg 700 5 0.5 0.903673210787 6.7324504764e-05 0.0107164467862
agg 800 5 0.5 0.920714605502 5.28172757799e-05 0.0100838817443
agg 900 5 0.5 0.934118414601 4.81315388708e-05 0.00584846967477
agg 1000 5 0.5 0.944575865267 3.34395651606e-05 0.01757889458
agg 400 5 0.75 0.720709559728 0.000161699442719 0.00482905455941
agg 500 5 0.75 0.764641515593 0.00013356630352 0.00742649126227
agg 550 5 0.75 0.784690940365 0.00012428320962 0.00670058676966
agg 600 5 0.75 0.80202865072 0.000137669236925 0.00651392695994
agg 700 5 0.75 0.832078367672 0.000116594583911 0.0107945700716
agg 800 5 0.75 0.856527472218 9.46930816122e-05 0.0113715518604
agg 900 5 0.75 0.876969519203 8.79912381842e-05 0.00805739745506
agg 1000 5 0.75 0.893800914641 6.26668703354e-05 0.0203518229137
agg 400 5 1.0 0.665255388819 0.000196952597561 0.00560536262002
agg 500 5 1.0 0.704767948273 0.00016187450495 0.00324466954707
agg 550 5 1.0 0.723900879266 0.000150099721299 0.00258448320109
agg 600 5 1.0 0.74070585443 0.000166526090262 0.00264218369434
agg 700 5 1.0 0.771663910666 0.000144946838206 0.00788137611652
agg 800 5 1.0 0.79877822695 0.000127389946797 0.00970540413796
agg 900 5 1.0 0.822355840825 0.000126330414062 0.00725627447689
agg 1000 5 1.0 0.842965954524 9.3118554395e-05 0.0206410223603
agg 400 5 1.5 0.603068215272 0.000260013886243 0.00761681827942
agg 500 5 1.5 0.632522301355 0.000213921133349 0.00613067521025
agg 550 5 1.5 0.647636572832 0.00019705388837 0.00339410652162
agg 600 5 1.5 0.661234423869 0.000217909552509 0.00258201881683
agg 700 5 1.5 0.688066250243 0.000188620909314 0.00352180225728
agg 800 5 1.5 0.713477009205 0.000165944595675 0.00464482282294
agg 900 5 1.5 0.736777571959 0.000167176118931 0.00294021827549
agg 1000 5 1.5 0.758246002826 0.000129779235969 0.0171351580598
agg 400 5 2.0 0.56945667924 0.0003099308364 0.00636345556989
agg 500 5 2.0 0.591576061337 0.000258577518278 0.00565614478929
agg 550 5 2.0 0.603653509398 0.00024017663132 0.00372692110966
agg 600 5 2.0 0.614644112894 0.000266681989943 0.00351930598949
agg 700 5 2.0 0.636019807009 0.000229679092246 0.00551480844805
agg 800 5 2.0 0.658154781598 0.000200742205789 0.00512670460572
agg 900 5 2.0 0.678695502701 0.000201724336364 0.000605657889676
agg 1000 5 2.0 0.698123760927 0.000156226268591 0.0135292998909
agg 400 5 2.5 0.548374685107 0.000354160834822 0.00625590614921
agg 500 5 2.5 0.565064740867 0.000295027695193 0.00439080746759
agg 550 5 2.5 0.575230818271 0.000276473527176 0.00353504777446
agg 600 5 2.5 0.583804821443 0.000307813592312 0.00340090212093
agg 700 5 2.5 0.601793384922 0.00026723574679 0.00599918372197
agg 800 5 2.5 0.620524621061 0.000234823477803 0.00586238760007
agg 900 5 2.5 0.637963220894 0.000234643925531 0.00241757131551
agg 1000 5 2.5 0.655004777474 0.000181045739561 0.0142461305656
agg 400 5 3.0 0.532099608789 0.000380083558497 0.0038852484728
agg 500 5 3.0 0.54637982416 0.000327917463532 0.00374001177091
agg 550 5 3.0 0.554564613555 0.000305722845438 0.00257909410865
agg 600 5 3.0 0.561797493422 0.000341747347474 0.00263339711794
agg 700 5 3.0 0.576878257813 0.000299706928091 0.00661959161769
agg 800 5 3.0 0.593148372973 0.000264132589144 0.00466993444989
agg 900 5 3.0 0.608369152273 0.000266104943485 0.00260825922639
agg 1000 5 3.0 0.623230558875 0.000205685241636 0.0143725892455
agg 400 5 4.0 0.506761184189 0.000414903206075 0.00453479294853
agg 500 5 4.0 0.518143014738 0.000364178904296 0.00368435635264
agg 550 5 4.0 0.526033172681 0.000350689875702 0.00246633936992
agg 600 5 4.0 0.5314192145 0.000397927898449 0.000238764850706
agg 700 5 4.0 0.542108292737 0.000351374518462 0.00361528566953
agg 800 5 4.0 0.555056690976 0.000312565871161 0.00368349536878
agg 900 5 4.0 0.567097453199 0.000317516700842 0.00152293136298
agg 1000 5 4.0 0.578434959858 0.000247443461871 0.0137280468486
agg 400 5 5.0 0.486487292456 0.000438094398373 0.00706321380863
agg 500 5 5.0 0.496409081864 0.000390935852738 0.00478820255407
agg 550 5 5.0 0.503418177569 0.000373446325372 0.00282769236923
agg 600 5 5.0 0.508238417245 0.000425862144563 0.00179371461998
agg 700 5 5.0 0.517627395798 0.000388435055179 0.00404311621036
agg 800 5 5.0 0.529223773044 0.000352977276008 0.00409847755644
agg 900 5 5.0 0.538416257401 0.000357741959764 0.0011029066879
agg 1000 5 5.0 0.547702717013 0.000280543251217 0.0131377851624
agg 400 10 0.266 0.823438232872 0.000104592058938 0.0162157143024
agg 500 10 0.266 0.858375440953 7.43398477386e-05 0.0125110735546
agg 550 10 0.266 0.872853796661 6.35583727475e-05 0.0112660823658
agg 600 10 0.266 0.885242429407 6.54318206808e-05 0.00994870303152
agg 700 10 0.266 0.905174174143 4.94237936112e-05 0.00852362458939
agg 800 10 0.266 0.92083505986 3.8172210362e-05 0.0103840449387
agg 900 10 0.266 0.932957006262 3.43822619747e-05 0.00732461455656
agg 1000 10 0.266 0.943025311022 2.3536691446e-05 0.0135877959112
agg 400 10 0.375 0.742739400741 0.000150016019143 0.0102911241231
agg 500 10 0.375 0.783962996761 0.000114353879423 0.00946149797032
agg 550 10 0.375 0.801828506298 0.000102009091628 0.00912417254145
agg 600 10 0.375 0.817810872044 0.000108344223145 0.00883224223257
agg 700 10 0.375 0.844735720576 8.39288196213e-05 0.00883690457184
agg 800 10 0.375 0.866893843926 6.59511571653e-05 0.0116911110347
agg 900 10 0.375 0.884872451338 6.0013989238e-05 0.00833003622344
agg 1000 10 0.375 0.900244529423 4.18836779432e-05 0.0158792244191
agg 400 10 0.5 0.680318884324 0.00018465102602 0.00425877843905
agg 500 10 0.5 0.719577031909 0.000148201776739 0.00395091788741
agg 550 10 0.5 0.737793352332 0.00013361797574 0.00443799930612
agg 600 10 0.5 0.754530531171 0.000144556015895 0.00479696586743
agg 700 10 0.5 0.784084945551 0.000119758224064 0.00621451387156
agg 800 10 0.5 0.809562358455 9.90367423239e-05 0.0101444525471
agg 900 10 0.5 0.831344560202 9.18775413582e-05 0.00794278397662
agg 1000 10 0.5 0.85062728062 6.50781959699e-05 0.0162057000496
agg 400 10 0.75 0.612946369715 0.000219808884001 0.00784870191328
agg 500 10 0.75 0.64274489891 0.000182742457647 0.00534599059607
agg 550 10 0.75 0.657531038421 0.000171715279608 0.00387051351148
agg 600 10 0.75 0.671702668523 0.000192524718111 0.00221405698894
agg 700 10 0.75 0.698358950718 0.000168554725044 0.000397345618073
agg 800 10 0.75 0.722999305122 0.000144253192839 0.00432632896273
agg 900 10 0.75 0.745605167029 0.000141526946574 0.00437023009419
agg 1000 10 0.75 0.76670199263 0.000106432159809 0.0124506526116
agg 400 10 1.0 0.579683162584 0.000247621185056 0.0080485735527
agg 500 10 1.0 0.601973644101 0.000204886491013 0.00564457432766
agg 550 10 1.0 0.613259784544 0.000192006329545 0.00436912201201
agg 600 10 1.0 0.624436030067 0.000215412403419 0.00463127435929
agg 700 10 1.0 0.646183019656 0.000192241066512 0.00399223304893
agg 800 10 1.0 0.667347853884 0.000173198096008 0.00512900737328
agg 900 10 1.0 0.687287895454 0.000176898225859 0.00315556490314
agg 1000 10 1.0 0.706834590506 0.000135608177353 0.00823462343611
agg 400 10 1.5 0.547014481646 0.000301120858499 0.005315790765
agg 500 10 1.5 0.560949522781 0.000247009422155 0.00396430474557
agg 550 10 1.5 0.567901232055 0.000229412941027 0.00428273823991
agg 600 10 1.5 0.57506570117 0.000255914082937 0.00434964983565
agg 700 10 1.5 0.589872007167 0.000226020314318 0.00451903491877
agg 800 10 1.5 0.604453439284 0.000203442988667 0.00643527365292
agg 900 10 1.5 0.618926797938 0.000209769183307 0.00627344108941
agg 1000 10 1.5 0.633633659469 0.000166380252954 0.0108017784408
agg 400 10 2.0 0.529024897762 0.00034911825897 0.00551864359234
agg 500 10 2.0 0.539023535376 0.000287702529634 0.00309326579917
agg 550 10 2.0 0.544536878675 0.000267438742318 0.00141043481497
agg 600 10 2.0 0.549737684337 0.000297905241963 0.00218672676067
agg 700 10 2.0 0.559974391498 0.000260219298685 0.00319814125656
agg 800 10 2.0 0.570919231074 0.000231680146229 0.00576673514505
agg 900 10 2.0 0.581665082543 0.000237363465135 0.00573948757518
agg 1000 10 2.0 0.592746587847 0.000187326120688 0.0104087238477
agg 400 10 2.5 0.516007126052 0.000396603741029 0.00418445307822
agg 500 10 2.5 0.524008619671 0.00032425333094 0.00220365527394
agg 550 10 2.5 0.527935029831 0.000303757158004 0.000888793248141
agg 600 10 2.5 0.532277389396 0.000337817957713 0.00111713897545
agg 700 10 2.5 0.540860135976 0.000294567624224 0.00132835233495
agg 800 10 2.5 0.549608617998 0.000261636392589 0.00356010211904
agg 900 10 2.5 0.557402401863 0.000265912708985 0.00464483614428
agg 1000 10 2.5 0.56590484247 0.000208512262586 0.0101767352106
agg 400 10 3.0 0.505672995106 0.00042705303771 0.00526129808831
agg 500 10 3.0 0.512066559468 0.00036042933627 0.00231949302843
agg 550 10 3.0 0.515380142268 0.000334847859581 0.00151659995417
agg 600 10 3.0 0.518651171542 0.000373532653797 3.85087084155e-05
agg 700 10 3.0 0.525261117712 0.000328090148583 0.00122862861436
agg 800 10 3.0 0.533124769198 0.000290378393043 0.00308121625888
agg 900 10 3.0 0.540023841884 0.000295167857323 0.00325175875956
agg 1000 10 3.0 0.546702848564 0.000231004311913 0.00901406174331
agg 400 10 4.0 0.487039728571 0.000473542334398 0.00669360912466
agg 500 10 4.0 0.491744384908 0.000405688896891 0.00334410223903
agg 550 10 4.0 0.494567697312 0.000389016920648 0.00271727201698
agg 600 10 4.0 0.497327928324 0.000438961460938 0.00200914570664
agg 700 10 4.0 0.502102699266 0.00038563618802 0.00163084344492
agg 800 10 4.0 0.508012446792 0.000343180420438 0.00343637711759
agg 900 10 4.0 0.512958063187 0.000350052197891 0.00228414775526
agg 1000 10 4.0 0.518174195933 0.000273783628997 0.0082736112049
agg 400 10 5.0 0.469973309281 0.000508487100677 0.00771257222326
agg 500 10 5.0 0.473957426289 0.000442863317184 0.00418987922446
agg 550 10 5.0 0.47647270847 0.000421301904064 0.00365278999265
agg 600 10 5.0 0.478899409653 0.000477412704283 0.00269473828534
agg 700 10 5.0 0.483180042789 0.000432453624498 0.00254044106704
agg 800 10 5.0 0.488399995913 0.000392085349413 0.00508823467285
agg 900 10 5.0 0.492423091584 0.000396919325452 0.00382017425085
agg 1000 10 5.0 0.496378147871 0.000311480214176 0.00967891232139
agg 400 15 0.266 0.757650430764 0.000155484932853 0.015188980385
agg 500 15 0.266 0.793948063308 0.000114310525619 0.0128267928617
agg 550 15 0.266 0.809974023928 0.00010008927978 0.0128586725143
agg 600 15 0.266 0.823984651455 0.000104932411329 0.0126711832646
agg 700 15 0.266 0.847950918842 8.02688727086e-05 0.0128923502111
agg 800 15 0.266 0.868270989274 6.26817351054e-05 0.012979810541
agg 900 15 0.266 0.884847376854 5.67190986024e-05 0.00969712182114
agg 1000 15 0.266 0.89944394621 3.94333537017e-05 0.0147427090872
agg 400 15 0.375 0.673650435659 0.00020959454104 0.00502043935329
agg 500 15 0.375 0.710148354124 0.000160825979782 0.00455587855277
agg 550 15 0.375 0.727276585374 0.000144756046386 0.00565510304699
agg 600 15 0.375 0.742871745204 0.000155859140904 0.00649818719036
agg 700 15 0.375 0.77086054214 0.00012562554151 0.00878495689493
agg 800 15 0.375 0.795765770537 0.000102653227182 0.0105498741226
agg 900 15 0.375 0.81705657069 9.53962216683e-05 0.00869241502574
agg 1000 15 0.375 0.836580320911 6.74015252749e-05 0.014773240893
agg 400 15 0.5 0.621269144275 0.000249034979489 0.00588241516824
agg 500 15 0.5 0.65153381801 0.000193603527242 0.00207286272546
agg 550 15 0.5 0.66646427725 0.000175959436714 0.00222932771791
agg 600 15 0.5 0.680416398657 0.000192279458396 0.000459819216735
agg 700 15 0.5 0.706592714192 0.000162632320105 0.00286651583586
agg 800 15 0.5 0.731233102347 0.000138211691509 0.00548080377966
agg 900 15 0.5 0.753189531907 0.000132748158773 0.00422373719617
agg 1000 15 0.5 0.774373743433 9.76296952542e-05 0.0113286645967
agg 400 15 0.75 0.573413096211 0.000306173906467 0.00685026250809
agg 500 15 0.75 0.593182649616 0.000241217469486 0.00424515951503
agg 550 15 0.75 0.603393983275 0.000220528163177 0.00449645378596
agg 600 15 0.75 0.613560679603 0.000241797901256 0.00444498168882
agg 700 15 0.75 0.63295607733 0.000206801004452 0.00465821355571
agg 800 15 0.75 0.652312408093 0.000179586330639 0.00555425118446
agg 900 15 0.75 0.670632091437 0.000179711580865 0.00261514760683
agg 1000 15 0.75 0.68917332744 0.000138009145831 0.00648697813668
agg 400 15 1.0 0.550896109782 0.000352070121351 0.00493046259422
agg 500 15 1.0 0.5653286006 0.000283923408476 0.003503338818
agg 550 15 1.0 0.572745847678 0.000259709416441 0.00366281060665
agg 600 15 1.0 0.580028248652 0.000284694714273 0.00391465638267
agg 700 15 1.0 0.594836102065 0.000243237113408 0.00520292883673
agg 800 15 1.0 0.609546276355 0.000211587755741 0.00597749521615
agg 900 15 1.0 0.623884160628 0.000211873955917 0.0050645359047
agg 1000 15 1.0 0.638898419743 0.000163421008585 0.00909591604285
agg 400 15 1.5 0.528887132152 0.000430180982925 0.0042282560992
agg 500 15 1.5 0.537766863315 0.00035674985376 0.00182079647405
agg 550 15 1.5 0.541949019893 0.000324994208904 0.00181152523951
agg 600 15 1.5 0.546800019196 0.00035946025304 0.00199792345433
agg 700 15 1.5 0.556178594635 0.000312071200986 0.00256373204336
agg 800 15 1.5 0.565761947005 0.000271470440206 0.00410016627561
agg 900 15 1.5 0.575029424415 0.000270454323616 0.00423039238712
agg 1000 15 1.5 0.584969692112 0.000208157962956 0.00861960603146
agg 400 15 2.0 0.515711624887 0.000482461037724 0.00364896140307
agg 500 15 2.0 0.522470846771 0.000402675417677 0.000313764655262
agg 550 15 2.0 0.525522548943 0.000379943144091 0.000381768600756
agg 600 15 2.0 0.528837240021 0.00042694463884 0.00109449258718
agg 700 15 2.0 0.535612835749 0.000367057733735 0.00126212668174
agg 800 15 2.0 0.542385678603 0.000321426227062 0.0037728858717
agg 900 15 2.0 0.548999802779 0.000325326513426 0.00293064808135
agg 1000 15 2.0 0.55643085577 0.000250814601715 0.00707166996308
agg 400 15 2.5 0.505936797354 0.000518818285767 0.00379621689913
agg 500 15 2.5 0.511019943952 0.000439518761222 0.00117420097092
agg 550 15 2.5 0.513305418633 0.000410327574745 0.00101323637231
agg 600 15 2.5 0.516151014263 0.000460659569738 0.000753353442919
agg 700 15 2.5 0.521670535137 0.000412143601208 0.00148937751214
agg 800 15 2.5 0.526787683945 0.000368806818941 0.00195814714759
agg 900 15 2.5 0.531685285933 0.000367318580133 0.0015494417156
agg 1000 15 2.5 0.537096810372 0.000284649509233 0.00693071253179
agg 400 15 3.0 0.49725178323 0.00054425274461 0.00445722261578
agg 500 15 3.0 0.501221856235 0.0004641162349 0.00157734788487
agg 550 15 3.0 0.503102197047 0.000438358133078 0.00170463943759
agg 600 15 3.0 0.505354323175 0.000494345325595 0.00142037435771
agg 700 15 3.0 0.509840540025 0.000436990221937 0.00205098818424
agg 800 15 3.0 0.514418485457 0.000396151583336 0.0028428629933
agg 900 15 3.0 0.518656909349 0.000407678175652 0.000369769877324
agg 1000 15 3.0 0.522840548863 0.000317333091397 0.00558543234414
agg 400 15 4.0 0.481002666381 0.000573954943865 0.00655265392966
agg 500 15 4.0 0.483614415678 0.000495029981021 0.00255109322157
agg 550 15 4.0 0.485077366084 0.000472417932654 0.00265340264345
agg 600 15 4.0 0.486802760631 0.000534772923382 0.00248693755334
agg 700 15 4.0 0.490281858775 0.000480753507273 0.00377934142035
agg 800 15 4.0 0.493477018441 0.000437118815677 0.00429447927701
agg 900 15 4.0 0.496459326152 0.00044867876084 0.00110388121693
agg 1000 15 4.0 0.499596656194 0.000356546965982 0.00679002194092
agg 400 15 5.0 0.46465574689 0.000601279608986 0.00652504270772
agg 500 15 5.0 0.467756692108 0.000519246964949 0.00400025740439
agg 550 15 5.0 0.468895510977 0.000493938247902 0.00440223556441
agg 600 15 5.0 0.470351479182 0.000562958863122 0.00380485698859
agg 700 15 5.0 0.472917518516 0.000511231027387 0.00392327204272
agg 800 15 5.0 0.475739836926 0.000468572051047 0.00454721958371
agg 900 15 5.0 0.478435152698 0.000486210145472 0.00359315761461
agg 1000 15 5.0 0.480419336926 0.000387605980571 0.00763739619725
agg 400 20 0.266 0.713449208292 0.000210032048382 0.0141208118627
agg 500 20 0.266 0.747758422374 0.000153691029979 0.0124038006863
agg 550 20 0.266 0.763540821673 0.000135802104793 0.0129045316972
agg 600 20 0.266 0.777651303109 0.000143941766502 0.0136219267915
agg 700 20 0.266 0.802499921584 0.000113430729282 0.0148584725419
agg 800 20 0.266 0.824256050941 9.06154452385e-05 0.0142722550235
agg 900 20 0.266 0.842723809923 8.2457409301e-05 0.0128231545485
agg 1000 20 0.266 0.859557489333 5.78274154175e-05 0.0145023727871
agg 400 20 0.375 0.632561353076 0.000287448556124 0.0039708023527
agg 500 20 0.375 0.663607326269 0.000211821752503 0.00153002528229
agg 550 20 0.375 0.678721129753 0.000187890181835 0.00272916765202
agg 600 20 0.375 0.692795838237 0.000201003603099 0.00428219158568
agg 700 20 0.375 0.71887231914 0.000164075232905 0.00714772797803
agg 800 20 0.375 0.742779195938 0.000136710688654 0.00816844954958
agg 900 20 0.375 0.764208697969 0.000129877612833 0.00822602166902
agg 1000 20 0.375 0.784568913207 9.42188164886e-05 0.0112622244174
agg 400 20 0.5 0.589603545851 0.00033750962309 0.00561171129527
agg 500 20 0.5 0.613050088288 0.00025631284178 0.00352511903312
agg 550 20 0.5 0.624974191163 0.000229692292355 0.00318470443576
agg 600 20 0.5 0.636503374228 0.000247609658026 0.00310845688585
agg 700 20 0.5 0.658487002176 0.000204589027869 0.0041003816081
agg 800 20 0.5 0.679921565828 0.000172471568353 0.00296882166272
agg 900 20 0.5 0.699757902083 0.000167802243143 0.00201496062237
agg 1000 20 0.5 0.719745902959 0.000125669341626 0.00586811457732
agg 400 20 0.75 0.553519127193 0.000402611866615 0.00578158335695
agg 500 20 0.75 0.56811574344 0.000317251774972 0.00379818654921
agg 550 20 0.75 0.575658685203 0.000289093602048 0.00389700479125
agg 600 20 0.75 0.583195736007 0.000315646525218 0.00533921238479
agg 700 20 0.75 0.597869962415 0.000266272873562 0.00603160534939
agg 800 20 0.75 0.612847990299 0.000227251533966 0.00639236984695
agg 900 20 0.75 0.627250557386 0.000223199008422 0.00430056297157
agg 1000 20 0.75 0.642575437723 0.000168668687695 0.0066421703733
agg 400 20 1.0 0.53708011774 0.000452681540458 0.00440249513336
agg 500 20 1.0 0.547284724953 0.000366359599788 0.00233707481878
agg 550 20 1.0 0.552654557643 0.000335845917367 0.00272736805028
agg 600 20 1.0 0.558168522402 0.000368914652443 0.00372097575406
agg 700 20 1.0 0.56874696131 0.000315457807983 0.00432022963138
agg 800 20 1.0 0.579872300717 0.000272444403821 0.00536683246002
agg 900 20 1.0 0.590474690917 0.000270043052822 0.00468295875168
agg 1000 20 1.0 0.601890753012 0.000205393221849 0.0067759609781
agg 400 20 1.5 0.520016814286 0.000535570507644 0.00367071894896
agg 500 20 1.5 0.526158814246 0.000444253321362 0.000868748123514
agg 550 20 1.5 0.529535927619 0.000405321710012 0.000887435006873
agg 600 20 1.5 0.533133583829 0.000451890001038 0.00282996661408
agg 700 20 1.5 0.540025612434 0.000394664813419 0.00451091096267
agg 800 20 1.5 0.546680519937 0.00034528789713 0.00268885472317
agg 900 20 1.5 0.553457267233 0.000345427579017 0.00272572877972
agg 1000 20 1.5 0.560761526456 0.000266050186292 0.00566096040662
agg 400 20 2.0 0.508969828599 0.000586738102246 0.00365160974508
agg 500 20 2.0 0.514423508336 0.00048941841138 0.00074383534827
agg 550 20 2.0 0.516480061071 0.000461038186096 0.000722734829194
agg 600 20 2.0 0.518967454201 0.00051783184944 0.00211169544167
agg 700 20 2.0 0.523727721164 0.000450016843937 0.0044294265077
agg 800 20 2.0 0.528556189412 0.000397859274054 0.00352455608056
agg 900 20 2.0 0.533472479613 0.000405410357114 0.0015248072389
agg 1000 20 2.0 0.538775036324 0.000314038768894 0.00442292391929
agg 400 20 2.5 0.500775395033 0.00061608545161 0.00427829889212
agg 500 20 2.5 0.504518265062 0.000521099674086 0.000858760635094
agg 550 20 2.5 0.506013148732 0.000485480913038 0.00120367045305
agg 600 20 2.5 0.508210133161 0.00054831112451 0.00168962169613
agg 700 20 2.5 0.512511874112 0.000491841694909 0.00329124217513
agg 800 20 2.5 0.516026778972 0.000441361950652 0.00354464020889
agg 900 20 2.5 0.519661350818 0.000443311572384 0.00116066695011
agg 1000 20 2.5 0.523520433265 0.000347447053 0.00280869752044
agg 400 20 3.0 0.493179010934 0.000636634788068 0.00510021975563
agg 500 20 3.0 0.495801264346 0.000538646304278 0.00151478508224
agg 550 20 3.0 0.497299458577 0.000509016327278 0.0018604378905
agg 600 20 3.0 0.498867849402 0.000574571153445 0.00206366954622
agg 700 20 3.0 0.502286446877 0.000510920390907 0.00356040419135
agg 800 20 3.0 0.505275912232 0.000464423954965 0.00283859247475
agg 900 20 3.0 0.50841659071 0.000478981424933 0.00236808896953
agg 1000 20 3.0 0.51140737393 0.000375808283052 0.00404925014579
agg 400 20 4.0 0.477696334942 0.000663591885509 0.00593558540219
agg 500 20 4.0 0.479856479954 0.000561043737045 0.0031839169108
agg 550 20 4.0 0.480857889874 0.000531777426299 0.00374113182603
agg 600 20 4.0 0.481900153516 0.000602422140919 0.00333601377877
agg 700 20 4.0 0.484662490083 0.000542783127816 0.00476083632336
agg 800 20 4.0 0.486569264145 0.000494049369344 0.00396097370312
agg 900 20 4.0 0.489011501915 0.00050881107325 0.00338968910782
agg 1000 20 4.0 0.490960027782 0.000406910505185 0.00507559281577
agg 400 20 5.0 0.462668868979 0.000690139603466 0.00805063317581
agg 500 20 5.0 0.464212679613 0.000582269650995 0.00351938620327
agg 550 20 5.0 0.464903600371 0.000551230796985 0.00319756773534
agg 600 20 5.0 0.466391648892 0.000625936856597 0.00433822305063
agg 700 20 5.0 0.468523905602 0.000565142599353 0.00594562030123
agg 800 20 5.0 0.469943297428 0.000517076596841 0.00519740590896
agg 900 20 5.0 0.472063084266 0.000539083086988 0.00414418489472
agg 1000 20 5.0 0.473524650148 0.000430621342275 0.00660092369647
agg 400 25 0.266 0.682108244989 0.000281324525776 0.0130162426028
agg 500 25 0.266 0.714155151193 0.000198485086195 0.012271405661
agg 550 25 0.266 0.72901354486 0.000173248040378 0.0124418971944
agg 600 25 0.266 0.742608958615 0.000182857777145 0.0136942024204
agg 700 25 0.266 0.766996561477 0.000145774643534 0.0150536591414
agg 800 25 0.266 0.788518251611 0.000118693074668 0.0146158730277
agg 900 25 0.266 0.807563203623 0.00011001092707 0.0144469711494
agg 1000 25 0.266 0.825265837086 7.8224831625e-05 0.014038700106
agg 400 25 0.375 0.60605650332 0.000379746124864 0.00426261727345
agg 500 25 0.375 0.632546492669 0.000275128114749 0.00169121476324
agg 550 25 0.375 0.64548881731 0.000242033931358 0.000464471925218
agg 600 25 0.375 0.658195700998 0.00025646740679 0.00246717402868
agg 700 25 0.375 0.681672683563 0.000206009965301 0.00473035821994
agg 800 25 0.375 0.703665995629 0.000170184881603 0.00582008249529
agg 900 25 0.375 0.723939787125 0.000162224397443 0.00698094506476
agg 1000 25 0.375 0.743723729169 0.000119446707663 0.00794157972171
agg 400 25 0.5 0.570590598703 0.000432765020452 0.00553109124731
agg 500 25 0.5 0.589441211555 0.000326103162935 0.00345451015844
agg 550 25 0.5 0.599208231177 0.00029123748411 0.00356289582235
agg 600 25 0.5 0.608494152534 0.00031281046513 0.00443785513934
agg 700 25 0.5 0.627273890464 0.000256066599317 0.0051428854187
agg 800 25 0.5 0.64525309168 0.000214004033576 0.00387612308977
agg 900 25 0.5 0.662852990913 0.000205980562238 0.00350498988935
agg 1000 25 0.5 0.680634041506 0.000153167683656 0.00241939759912
agg 400 25 0.75 0.541617064746 0.000499438876967 0.0044510746286
agg 500 25 0.75 0.553383412117 0.000391602296088 0.00266776532725
agg 550 25 0.75 0.55932597975 0.000356740837929 0.00292748338848
agg 600 25 0.75 0.565363232132 0.000389488705225 0.00483338779956
agg 700 25 0.75 0.577018899395 0.000328717246897 0.0056535537699
agg 800 25 0.75 0.588833177898 0.000280379631202 0.00583044342762
agg 900 25 0.75 0.600543217026 0.000274476134631 0.00581277939242
agg 1000 25 0.75 0.613040966078 0.000206451512139 0.00529857455511
agg 400 25 1.0 0.528392808413 0.000550845564816 0.00493124317226
agg 500 25 1.0 0.536821023829 0.000442313877813 0.0016658536172
agg 550 25 1.0 0.541097741023 0.000405939916705 0.00313725233897
agg 600 25 1.0 0.545466536776 0.000446725673947 0.00290509332968
agg 700 25 1.0 0.553767342646 0.000383133166529 0.00359120302242
agg 800 25 1.0 0.562165159366 0.00033208929939 0.00410746949364
agg 900 25 1.0 0.570626375147 0.000329583288468 0.00571909241116
agg 1000 25 1.0 0.57979199831 0.000250638980494 0.00498096776912
agg 400 25 1.5 0.514620049643 0.000634887230251 0.00302425528978
agg 500 25 1.5 0.51958121035 0.000519936990803 0.00164051874638
agg 550 25 1.5 0.522165324537 0.000475926801874 0.00110091721608
agg 600 25 1.5 0.524940270568 0.000531687542256 0.00125929246296
agg 700 25 1.5 0.530271499222 0.00046526337865 0.00311354802248
agg 800 25 1.5 0.535702705401 0.000408869773018 0.00128248506232
agg 900 25 1.5 0.540812108849 0.00041152127885 0.0026955808989
agg 1000 25 1.5 0.546713939172 0.000318292055729 0.00325995398151
agg 400 25 2.0 0.505195340166 0.000686087876698 0.00415266446222
agg 500 25 2.0 0.509094275919 0.00056530394161 0.000562208508357
agg 550 25 2.0 0.510899792414 0.000528669461383 0.000665885006439
agg 600 25 2.0 0.513063304822 0.000592420109862 0.00207729080432
agg 700 25 2.0 0.516727821216 0.000517951633947 0.00327999984363
agg 800 25 2.0 0.52074972995 0.0004603041108 0.00234341979959
agg 900 25 2.0 0.524513434116 0.000469702828995 0.00229860930971
agg 1000 25 2.0 0.528533051051 0.000365945227665 0.00133597305606
agg 400 25 2.5 0.497533138521 0.000713921817544 0.00377963027747
agg 500 25 2.5 0.500675289139 0.000592674515817 0.00151855470041
agg 550 25 2.5 0.50168918993 0.000551411820995 0.000771736217286
agg 600 25 2.5 0.503822927598 0.000620994965126 0.00291693538601
agg 700 25 2.5 0.506861646746 0.000555003754619 0.00342391590899
agg 800 25 2.5 0.50974739973 0.000497522795629 0.00275101442099
agg 900 25 2.5 0.512599816723 0.000504119991553 0.00287546906287
agg 1000 25 2.5 0.5157247024 0.000397069514354 0.00266708338568
agg 400 25 3.0 0.490281175043 0.000734129143712 0.00401875965332
agg 500 25 3.0 0.492615951386 0.000606458671364 0.00189587563456
agg 550 25 3.0 0.493816197516 0.000570058847709 0.00205478105438
agg 600 25 3.0 0.495162894708 0.000641619539184 0.00293383252017
agg 700 25 3.0 0.497903363349 0.000570979585952 0.00401798189611
agg 800 25 3.0 0.500167339231 0.000516945985529 0.00311282650021
agg 900 25 3.0 0.502270000365 0.000533087919051 0.002140141916
agg 1000 25 3.0 0.504810266146 0.000420176228382 0.00275584896537
agg 400 25 4.0 0.47544361116 0.000764239268232 0.00572243834368
agg 500 25 4.0 0.477085899287 0.000627744203425 0.00301219489337
agg 550 25 4.0 0.477932177084 0.000590383238239 0.00256454498361
agg 600 25 4.0 0.479360781924 0.000663558943534 0.00501486832067
agg 700 25 4.0 0.481529076384 0.00059504990661 0.00531518861261
agg 800 25 4.0 0.482736490037 0.000539607536538 0.00435147680989
agg 900 25 4.0 0.484642044919 0.000556711471871 0.00463788900211
agg 1000 25 4.0 0.485899022501 0.000444923516868 0.00368225132406
agg 400 25 5.0 0.461058546111 0.000795907587167 0.00693292802613
agg 500 25 5.0 0.462575086207 0.00064920271139 0.0044441248634
agg 550 25 5.0 0.463136628813 0.000608628229993 0.00414100274803
agg 600 25 5.0 0.46399903602 0.000686009310084 0.00466496368697
agg 700 25 5.0 0.465720484574 0.000615237878908 0.00537609250868
agg 800 25 5.0 0.466756093623 0.000559243904925 0.00484410979489
agg 900 25 5.0 0.468454417495 0.000581734917922 0.0053906596676
agg 1000 25 5.0 0.469147025079 0.000465324308634 0.00407207381699
agg 400 30 0.266 0.65886399388 0.000366832323278 0.0123330756215
agg 500 30 0.266 0.688582444192 0.000253055858253 0.0116949440413
agg 550 30 0.266 0.702523119984 0.000218547425463 0.0119231685242
agg 600 30 0.266 0.71529330028 0.000228625981424 0.0132995969007
agg 700 30 0.266 0.738753611566 0.000179885533888 0.0144686014753
agg 800 30 0.266 0.759676134661 0.000146267200889 0.0145522239697
agg 900 30 0.266 0.77847339515 0.000137170155882 0.0150727553312
agg 1000 30 0.266 0.796182830028 9.90109677093e-05 0.0133853137478
agg 400 30 0.375 0.587596024774 0.00048156244822 0.00513298533823
agg 500 30 0.375 0.610757879372 0.00034552807765 0.00267982908354
agg 550 30 0.375 0.622030599471 0.000302991119224 0.000990823622787
agg 600 30 0.375 0.633114091461 0.000319833846626 0.00255707656641
agg 700 30 0.375 0.654085556745 0.000255180649435 0.00241578607808
agg 800 30 0.375 0.674186860069 0.000208966719422 0.00387681153863
agg 900 30 0.375 0.692994512712 0.000197685757363 0.00548542473851
agg 1000 30 0.375 0.711596847635 0.000144881043799 0.00527245361222
agg 400 30 0.5 0.557311076216 0.000534594912899 0.00401965651115
agg 500 30 0.5 0.573492539259 0.000398517391157 0.00390756122911
agg 550 30 0.5 0.581711444882 0.000355257535781 0.00358744735771
agg 600 30 0.5 0.590029038825 0.000380971657448 0.00527867115876
agg 700 30 0.5 0.605414822456 0.000311858548683 0.00553881144975
agg 800 30 0.5 0.621301123817 0.00025997798082 0.00606101095173
agg 900 30 0.5 0.636220797597 0.000249410181168 0.00442264491263
agg 1000 30 0.5 0.651934876567 0.00018473274408 0.00282115882182
agg 400 30 0.75 0.533930296317 0.00059837495543 0.00397273165015
agg 500 30 0.75 0.543596270935 0.000464063744095 0.00248599656781
agg 550 30 0.75 0.548193846558 0.000421985967853 0.00316451554848
agg 600 30 0.75 0.553485830305 0.000460558651382 0.00451121396267
agg 700 30 0.75 0.563115193654 0.000388541457936 0.00500796735306
agg 800 30 0.75 0.572785256685 0.000332630340207 0.00503128864019
agg 900 30 0.75 0.582504757832 0.000326265267178 0.00651311201051
agg 1000 30 0.75 0.592897506427 0.000245878464564 0.00432147173586
agg 400 30 1.0 0.522664700236 0.00065091976321 0.0034652263963
agg 500 30 1.0 0.529780086924 0.000515213366931 0.00293247811445
agg 550 30 1.0 0.533282713377 0.00047153588553 0.00138219980235
agg 600 30 1.0 0.536932313504 0.00051893136867 0.00236249479806
agg 700 30 1.0 0.543934282996 0.000445134143934 0.00351039379988
agg 800 30 1.0 0.550741609961 0.000386872028418 0.00432756990413
agg 900 30 1.0 0.557775797694 0.00038467144822 0.00579327913748
agg 1000 30 1.0 0.565120028019 0.000293675655176 0.00349127651791
agg 400 30 1.5 0.510170962344 0.000738272693856 0.00199782440362
agg 500 30 1.5 0.515274249921 0.000592784685886 0.000869154988224
agg 550 30 1.5 0.517368769877 0.00054232426006 0.00210369117598
agg 600 30 1.5 0.519529508985 0.000604967652799 0.00134540356117
agg 700 30 1.5 0.524121029062 0.000527257782072 0.00336057058937
agg 800 30 1.5 0.528666000317 0.000464366667358 0.00358944586773
agg 900 30 1.5 0.532802951481 0.000468506766356 0.00182984846606
agg 1000 30 1.5 0.537522621259 0.000363498693226 0.00195666166665
agg 400 30 2.0 0.502654474973 0.000789125902195 0.0044708295715
agg 500 30 2.0 0.505960259555 0.00063848385743 0.00121307539209
agg 550 30 2.0 0.507285345853 0.000592601960861 0.000726891208916
agg 600 30 2.0 0.509342313122 0.000660950011213 0.00238006686919
agg 700 30 2.0 0.51250936873 0.000578235530735 0.00206948239362
agg 800 30 2.0 0.515451313982 0.000514740097719 0.00282102741292
agg 900 30 2.0 0.51849506003 0.000524429221103 0.00166957842114
agg 1000 30 2.0 0.522004040686 0.000409681396208 0.000330468699383
agg 400 30 2.5 0.495085423959 0.000819434769968 0.00371412292554
agg 500 30 2.5 0.497894712623 0.000664278305501 0.00122637962795
agg 550 30 2.5 0.499133921462 0.000613314359394 0.00189220640392
agg 600 30 2.5 0.500785569885 0.000688148906539 0.00281383032483
agg 700 30 2.5 0.503271780895 0.000610861291494 0.00317019499217
agg 800 30 2.5 0.505653772237 0.000546908922108 0.0031294049421
agg 900 30 2.5 0.508171324138 0.000555297238079 0.0033268221721
agg 1000 30 2.5 0.510462252525 0.000438570718731 0.00137031586941
agg 400 30 3.0 0.488172810028 0.000844781906451 0.00441759923467
agg 500 30 3.0 0.490625252631 0.000677152756261 0.00219711037852
agg 550 30 3.0 0.491169186042 0.000632035916947 0.00148720166207
agg 600 30 3.0 0.492376122117 0.000707633132814 0.0019219039707
agg 700 30 3.0 0.494963106703 0.000625764693111 0.00327118607996
agg 800 30 3.0 0.496675910987 0.000563251981845 0.00295618988787
agg 900 30 3.0 0.498516545735 0.000579711310844 0.0031344075538
agg 1000 30 3.0 0.50070747983 0.000457057031267 0.0029288684861
agg 400 30 4.0 0.474331418978 0.000876254127467 0.00615158694157
agg 500 30 4.0 0.475870634414 0.000701659272872 0.00347394329481
agg 550 30 4.0 0.476413067391 0.000651638479114 0.00354929402025
agg 600 30 4.0 0.477247593506 0.000728591370477 0.00386677981382
agg 700 30 4.0 0.478899492296 0.000647355244309 0.00403911833262
agg 800 30 4.0 0.480159838228 0.000582059367318 0.00459255201741
agg 900 30 4.0 0.481587831992 0.00060008421627 0.00485845385899
agg 1000 30 4.0 0.482747595553 0.000477855521746 0.0028161325184
agg 400 30 5.0 0.459542579526 0.000921680036654 0.00678462893454
agg 500 30 5.0 0.461164648445 0.0007286570319 0.0038247363909
agg 550 30 5.0 0.461873757096 0.000673165685304 0.00438722092134
agg 600 30 5.0 0.462774600193 0.000751346824632 0.00527082166262
agg 700 30 5.0 0.463862998412 0.000666666748136 0.00519018297151
agg 800 30 5.0 0.464812978271 0.00060118615676 0.00539765034058
agg 900 30 5.0 0.465952061293 0.000623462669611 0.00485543012629
agg 1000 30 5.0 0.466825781811 0.000495900580669 0.0039280229109
agg 400 40 0.266 0.626232932709 0.000572511654831 0.0109292641816
agg 500 40 0.266 0.652354931304 0.000385243638722 0.0110639838647
agg 550 40 0.266 0.664570900051 0.000329326969798 0.0111539946634
agg 600 40 0.266 0.67598723528 0.000340821673137 0.0125306432013
agg 700 40 0.266 0.697274856091 0.000263247222625 0.0128856282177
agg 800 40 0.266 0.716361881408 0.000210617744265 0.0140153922936
agg 900 40 0.266 0.733994076855 0.000195284856496 0.0151668250271
agg 1000 40 0.266 0.750818799422 0.000141025756207 0.0126438111407
agg 400 40 0.375 0.56366488456 0.000709113670606 0.00470782333946
agg 500 40 0.375 0.581990449377 0.000501312537146 0.00382014480086
agg 550 40 0.375 0.59137581144 0.000437195830753 0.00242059784924
agg 600 40 0.375 0.600009245911 0.000460595221025 0.00309303250838
agg 700 40 0.375 0.617010639132 0.000365520274051 0.00252874261196
agg 800 40 0.375 0.633534461952 0.000297861721911 0.00260214950432
agg 900 40 0.375 0.649452812835 0.000279859474065 0.00315652770563
agg 1000 40 0.375 0.665258074617 0.000204017364897 0.00141940496431
agg 400 40 0.5 0.541039110902 0.000756659258868 0.00350382207955
agg 500 40 0.5 0.553624025149 0.000551457179492 0.00376356464884
agg 550 40 0.5 0.559755357588 0.000488728131147 0.00287499060141
agg 600 40 0.5 0.566058002451 0.000522456470938 0.00422442555967
agg 700 40 0.5 0.578119346641 0.000426645738371 0.00393179852959
agg 800 40 0.5 0.589920057921 0.000356117701945 0.00474327811872
agg 900 40 0.5 0.601733743488 0.000341821244739 0.00565477243778
agg 1000 40 0.5 0.613923485753 0.000253449386095 0.00363009371141
agg 400 40 0.75 0.523414875228 0.000818158056015 0.00343496999195
agg 500 40 0.75 0.531173855507 0.000614122246235 0.0026384861733
agg 550 40 0.75 0.534974512378 0.000552642767561 0.00181957445524
agg 600 40 0.75 0.538722681185 0.000599718774327 0.00196540213746
agg 700 40 0.75 0.546238910694 0.00050320686955 0.00407273874726
agg 800 40 0.75 0.553363935174 0.000431051250403 0.0056732753785
agg 900 40 0.75 0.560635426406 0.000423914233339 0.00427667874504
agg 1000 40 0.75 0.568256202428 0.000321204111002 0.00392692237668
agg 400 40 1.0 0.514577205036 0.000872665982466 0.00508084617714
agg 500 40 1.0 0.520630914195 0.000665049736055 0.00169460458947
agg 550 40 1.0 0.523459865557 0.000602561716547 0.000643713997315
agg 600 40 1.0 0.52647712382 0.000658756099227 0.00347369953432
agg 700 40 1.0 0.531683874186 0.000560633894666 0.00323047218006
agg 800 40 1.0 0.536940603575 0.000486547489478 0.00329939217209
agg 900 40 1.0 0.541816106674 0.000484189798902 0.00383927465944
agg 1000 40 1.0 0.547462205774 0.000371131482281 0.00256690914232
agg 400 40 1.5 0.505076196748 0.000960614614941 0.00448134165796
agg 500 40 1.5 0.509335956613 0.000745881242936 0.00127632333016
agg 550 40 1.5 0.510808630383 0.000677882116095 0.000398619608466
agg 600 40 1.5 0.513006855725 0.000747696688212 0.00199091739293
agg 700 40 1.5 0.516231905508 0.000643651995404 0.000326853492997
agg 800 40 1.5 0.519518910004 0.000564657369206 0.00291895596287
agg 900 40 1.5 0.522976463979 0.000568728375798 0.00391961960631
agg 1000 40 1.5 0.526272713767 0.0004414937097 0.0011788993012
agg 400 40 2.0 0.498106985174 0.00102805904278 0.00498500969551
agg 500 40 2.0 0.501166267118 0.000796599118017 0.00119696337613
agg 550 40 2.0 0.502733456 0.000726066047415 0.000941586549196
agg 600 40 2.0 0.504066317172 0.000801177332375 0.0030799879659
agg 700 40 2.0 0.506719604349 0.000693091581507 0.00150206586714
agg 800 40 2.0 0.509221734478 0.000612193920386 0.00237827898054
agg 900 40 2.0 0.51129904296 0.000620632513521 0.0031244079884
agg 1000 40 2.0 0.513770305005 0.00048495178436 0.000213035704911
agg 400 40 2.5 0.491479499085 0.001070286106 0.00436188199702
agg 500 40 2.5 0.494155921406 0.000824630337315 0.0017605380142
agg 550 40 2.5 0.495339739888 0.000749319762784 0.00179056118154
agg 600 40 2.5 0.496547871719 0.000830469601715 0.00284539831309
agg 700 40 2.5 0.49870582106 0.000721519533168 0.00224337586985
agg 800 40 2.5 0.500415129704 0.000638941275137 0.00270347221997
agg 900 40 2.5 0.502145194826 0.000648490876336 0.00356139731341
agg 1000 40 2.5 0.504102971872 0.000510033609707 0.00195659271673
agg 400 40 3.0 0.484868384838 0.00110308167776 0.00435400021497
agg 500 40 3.0 0.487389633551 0.000841687079239 0.00287463266396
agg 550 40 3.0 0.488376719418 0.000767025437807 0.00202147117296
agg 600 40 3.0 0.489391742564 0.000846331970349 0.00324453947988
agg 700 40 3.0 0.491166165864 0.00073504141379 0.00208718823449
agg 800 40 3.0 0.492512460354 0.000651494739923 0.00337194615933
agg 900 40 3.0 0.493838472621 0.000664984810814 0.00396131933188
agg 1000 40 3.0 0.495389299508 0.000523586213759 0.00125356953672
agg 400 40 4.0 0.471120328273 0.00116726674853 0.00535658676322
agg 500 40 4.0 0.472921783594 0.000885593792909 0.00286712184913
agg 550 40 4.0 0.47368660264 0.000798402371154 0.00238040906295
agg 600 40 4.0 0.474678409929 0.000875228567983 0.00438779266855
agg 700 40 4.0 0.476257718321 0.000757269819136 0.00347693182511
agg 800 40 4.0 0.477062814822 0.000670166380069 0.00409944628687
agg 900 40 4.0 0.477847440087 0.000685584373732 0.00488850631982
agg 1000 40 4.0 0.479091605425 0.000539671229478 0.00231837892108
agg 400 40 5.0 0.457528407053 0.00122245541068 0.00740352431744
agg 500 40 5.0 0.45885147266 0.000919421856139 0.00413184676855
agg 550 40 5.0 0.459570176349 0.000832461799871 0.00466757382285
agg 600 40 5.0 0.460546037417 0.000910315464293 0.00536814491132
agg 700 40 5.0 0.461730317347 0.000783666766205 0.00436419428709
agg 800 40 5.0 0.462218894328 0.000691556238837 0.00502738390669
agg 900 40 5.0 0.463263744706 0.000706747453031 0.0059920592569
agg 1000 40 5.0 0.463603805452 0.000557983283965 0.00309576119083
agg 400 50 0.266 0.604216072518 0.000815412889764 0.0107576054151
agg 500 50 0.266 0.627120063725 0.000543869620271 0.00998026673146
agg 550 50 0.266 0.638402463306 0.000461600561062 0.00982574927052
agg 600 50 0.266 0.648923026006 0.000475154463001 0.0118362781791
agg 700 50 0.266 0.667918691507 0.000364132008153 0.0115448589302
agg 800 50 0.266 0.685424344218 0.000288601823612 0.0134533253149
agg 900 50 0.266 0.701909802588 0.000265247769293 0.0145480646875
agg 1000 50 0.266 0.717490110123 0.000190085974852 0.0120840981155
agg 400 50 0.375 0.547679696583 0.000969953560424 0.00302163889248
agg 500 50 0.375 0.563737171227 0.000674463571506 0.00393517077229
agg 550 50 0.375 0.571893246566 0.000584882103707 0.00378220498121
agg 600 50 0.375 0.579087876369 0.000614198581519 0.00345545742353
agg 700 50 0.375 0.593096536563 0.000486518805748 0.00198438477926
agg 800 50 0.375 0.607109459607 0.000395720302561 0.00326366208812
agg 900 50 0.375 0.620590856255 0.000371352774406 0.00313144487036
agg 1000 50 0.375 0.63413947108 0.000270752521641 0.000684547204302
agg 400 50 0.5 0.530118491585 0.0010121729046 0.0045140272604
agg 500 50 0.5 0.541041282858 0.00071974195939 0.00443148341627
agg 550 50 0.5 0.546033258701 0.000633342870624 0.00255978339845
agg 600 50 0.5 0.551214334579 0.000673129472477 0.00333355799226
agg 700 50 0.5 0.561280651622 0.000545890774488 0.00351085368694
agg 800 50 0.5 0.57083733179 0.000454609541529 0.00409964443413
agg 900 50 0.5 0.580419602829 0.000436213379497 0.00603559947821
agg 1000 50 0.5 0.590189671056 0.000324103389579 0.00425059257243
agg 400 50 0.75 0.516076795485 0.00107537484041 0.00364216101707
agg 500 50 0.75 0.523156450756 0.000781334458708 0.00320864204324
agg 550 50 0.75 0.526428786634 0.000693878727142 0.00145041498653
agg 600 50 0.75 0.529713124204 0.000746858342673 0.00245627543008
agg 700 50 0.75 0.535845365132 0.000619116418597 0.00488134513049
agg 800 50 0.75 0.541827482771 0.000526679212633 0.0046497964114
agg 900 50 0.75 0.547463249687 0.00051691820909 0.00414415505181
agg 1000 50 0.75 0.553536812062 0.000392268656238 0.0034472710408
agg 400 50 1.0 0.508595674823 0.00113046984682 0.00443187971147
agg 500 50 1.0 0.514661362275 0.000831250019541 0.00410019695146
agg 550 50 1.0 0.517245517129 0.000743542335516 0.000924242840706
agg 600 50 1.0 0.519629307914 0.000805704171242 0.000908992095049
agg 700 50 1.0 0.524163093479 0.000676265812508 0.00168978230487
agg 800 50 1.0 0.528333754458 0.000582600610165 0.00123486510686
agg 900 50 1.0 0.532553074213 0.000576618286127 0.0025698314257
agg 1000 50 1.0 0.536911492595 0.000442035079601 0.0019515035329
agg 400 50 1.5 0.501031803597 0.00122077723799 0.00319943955791
agg 500 50 1.5 0.504808930217 0.000914796920172 0.00174668222768
agg 550 50 1.5 0.506738509326 0.000822533142469 0.00102015876541
agg 600 50 1.5 0.50855512197 0.000896736767771 0.00197803973901
agg 700 50 1.5 0.511197941994 0.000761927759161 0.000125437547936
agg 800 50 1.5 0.513990672043 0.00066189245204 0.00159092702201
agg 900 50 1.5 0.517063103022 0.000661915742241 0.00248768084489
agg 1000 50 1.5 0.519633709301 0.000512466098712 0.000976501664023
agg 400 50 2.0 0.494581891112 0.00131131648643 0.00441228478243
agg 500 50 2.0 0.497878792078 0.000974376477175 0.00134572632487
agg 550 50 2.0 0.49955465777 0.000877331896563 0.00377124979996
agg 600 50 2.0 0.500306027603 0.000956636033358 0.00164193877778
agg 700 50 2.0 0.502961478494 0.000813109534625 0.00130230180479
agg 800 50 2.0 0.504968885155 0.000708866822362 0.00231766656011
agg 900 50 2.0 0.506858837051 0.000712338459833 0.00284144791665
agg 1000 50 2.0 0.509088226488 0.000554041317957 0.00053706863432
agg 400 50 2.5 0.488660189961 0.00137305891007 0.00479800183565
agg 500 50 2.5 0.491620793122 0.00101182853685 0.00271637264009
agg 550 50 2.5 0.492564211514 0.000907598899769 0.0015483540749
agg 600 50 2.5 0.493358060272 0.000989525025041 0.00174917211538
agg 700 50 2.5 0.495554033558 0.000842737088605 0.00361185009194
agg 800 50 2.5 0.497276034646 0.000732754158864 0.00320403435115
agg 900 50 2.5 0.498610182782 0.00073868704278 0.00320682721115
agg 1000 50 2.5 0.500133277195 0.00057718031118 0.00116353698378
agg 400 50 3.0 0.481814091387 0.00142356126281 0.0029999564326
agg 500 50 3.0 0.484897131275 0.00104191165359 0.00225625929772
agg 550 50 3.0 0.486012466358 0.00093130612774 0.00272402730814
agg 600 50 3.0 0.486829733012 0.00101117175386 0.00245040140767
agg 700 50 3.0 0.488476593577 0.000857975437124 0.00152773767908
agg 800 50 3.0 0.489989285326 0.000747359083814 0.00403683884862
agg 900 50 3.0 0.491158001082 0.000753658019975 0.00425525916395
agg 1000 50 3.0 0.492233699419 0.000588430474665 0.0026206088148
agg 400 50 4.0 0.4690987558 0.00150758324862 0.00579724400684
agg 500 50 4.0 0.470673621032 0.00110009848377 0.0035926623164
agg 550 50 4.0 0.471487421955 0.000977385820777 0.00258663190831
agg 600 50 4.0 0.472909772577 0.00105745268988 0.00473649045683
agg 700 50 4.0 0.474164959942 0.000891428598461 0.0026507643999
agg 800 50 4.0 0.475099089173 0.00077116573555 0.0047575421609
agg 900 50 4.0 0.475821276123 0.00077449959625 0.00485706038676
agg 1000 50 4.0 0.476393212261 0.000605339500743 0.00316253577063
agg 400 50 5.0 0.455007324433 0.00159360807262 0.00402048953537
agg 500 50 5.0 0.457541524752 0.00116153907135 0.00551616681147
agg 550 50 5.0 0.458004719386 0.00102525944636 0.00403066358546
agg 600 50 5.0 0.459211260146 0.00109589024145 0.00714532439305
agg 700 50 5.0 0.46014140411 0.000921986943042 0.00407460484663
agg 800 50 5.0 0.460574172724 0.000800074664995 0.00553617232478
agg 900 50 5.0 0.461142190004 0.000804215286699 0.00468397551673
agg 1000 50 5.0 0.46154579966 0.000625869029062 0.00260320706451
agg 400 60 0.266 0.586863382021 0.00109359808855 0.00910548367852
agg 500 60 0.266 0.608589905497 0.000723871637558 0.00963772853963
agg 550 60 0.266 0.618982248422 0.000612466615397 0.00887238191846
agg 600 60 0.266 0.628454701871 0.00062868223052 0.0107978250211
agg 700 60 0.266 0.646000726902 0.000479790310537 0.0105741198707
agg 800 60 0.266 0.662181445121 0.000377873251258 0.0128071887962
agg 900 60 0.266 0.677716507806 0.000345444727671 0.0138010525667
agg 1000 60 0.266 0.691998807497 0.000246708341597 0.0115835820503
agg 400 60 0.375 0.536906082525 0.00126046382118 0.00363627588571
agg 500 60 0.375 0.551326027529 0.000863122947467 0.00384680398985
agg 550 60 0.375 0.557867830393 0.000748140618028 0.00195308686477
agg 600 60 0.375 0.563722728802 0.000782597704848 0.00218096699646
agg 700 60 0.375 0.576539764863 0.000616351360082 0.00218842466508
agg 800 60 0.375 0.588759248556 0.000500691359936 0.00359947559967
agg 900 60 0.375 0.600700089073 0.000468881300949 0.00408124453471
agg 1000 60 0.375 0.612031914221 0.000342106190673 0.00188994296148
agg 400 60 0.5 0.521252467476 0.00130669617915 0.00120028004339
agg 500 60 0.5 0.532151769368 0.000907814394434 0.0034338970682
agg 550 60 0.5 0.536773317872 0.000792487276957 0.00145194682824
agg 600 60 0.5 0.541118915689 0.000836599288124 0.00175142902825
agg 700 60 0.5 0.549973840818 0.000672066235692 0.00201277658215
agg 800 60 0.5 0.557860441931 0.000556843090415 0.00539536469541
agg 900 60 0.5 0.566206646485 0.000532293237229 0.0042967230166
agg 1000 60 0.5 0.574381935458 0.0003955669164 0.00346368189074
agg 400 60 0.75 0.510168260586 0.00136208824138 0.00561256434777
agg 500 60 0.75 0.517431823828 0.000967823810836 0.00224749933166
agg 550 60 0.75 0.520576774256 0.00084971618446 0.000598238407123
agg 600 60 0.75 0.522992616992 0.000909007689106 0.00198780364141
agg 700 60 0.75 0.529062432453 0.000741804164706 0.00263462897353
agg 800 60 0.75 0.533585802024 0.000625971813752 0.00373106548693
agg 900 60 0.75 0.538636239866 0.000610155089767 0.0045345460519
agg 1000 60 0.75 0.543750287848 0.000461741979689 0.00285711622252
agg 400 60 1.0 0.504123417309 0.00142123728958 0.00375991737749
agg 500 60 1.0 0.509948815015 0.00101820132555 0.00221926980479
agg 550 60 1.0 0.512589732906 0.000899367687557 0.00322677894133
agg 600 60 1.0 0.514665611426 0.000965976321875 0.00251649374644
agg 700 60 1.0 0.518935710053 0.000798575229734 0.00416249249235
agg 800 60 1.0 0.522834660106 0.000681151775717 0.00342602402971
agg 900 60 1.0 0.52638094233 0.000669194886483 0.00466228936096
agg 1000 60 1.0 0.529797444117 0.000511376124985 0.00201028475323
agg 400 60 1.5 0.496388468171 0.00152047046119 0.00238004334838
agg 500 60 1.5 0.501423510273 0.00110449682282 0.00164858382257
agg 550 60 1.5 0.503002113616 0.000982636407973 0.0023454682323
agg 600 60 1.5 0.504539894792 0.00106201860462 0.00149399980674
agg 700 60 1.5 0.50750002207 0.000889984053426 0.00147270451642
agg 800 60 1.5 0.510448994307 0.000763686968785 0.00246249898763
agg 900 60 1.5 0.512323017742 0.000757453117897 0.001188744059
agg 1000 60 1.5 0.515161855006 0.00058250551 0.000505211320825
agg 400 60 2.0 0.490919025856 0.00162251072989 0.00687549156363
agg 500 60 2.0 0.494564984355 0.00118041072595 0.00264345421467
agg 550 60 2.0 0.496551560887 0.00104981407542 0.00206386029529
agg 600 60 2.0 0.498107774469 0.00112754206742 0.00315100327061
agg 700 60 2.0 0.500387133873 0.000943546119203 0.0030362107537
agg 800 60 2.0 0.50220493809 0.000812795987422 0.00280034024615
agg 900 60 2.0 0.504244774967 0.000806319705189 0.00348262752115
agg 1000 60 2.0 0.505489023418 0.000623875625917 0.000124340146477
agg 400 60 2.5 0.485335023911 0.00172299001868 0.00241151791004
agg 500 60 2.5 0.48884728948 0.00123571470975 0.00343784005557
agg 550 60 2.5 0.490454593589 0.00108933161402 0.002243568148
agg 600 60 2.5 0.491412405022 0.00117391899967 0.00302903717797
agg 700 60 2.5 0.493003327146 0.000982070014546 0.000118406743807
agg 800 60 2.5 0.495012443161 0.00083795863901 0.00351230795263
agg 900 60 2.5 0.496367350195 0.00083343916816 0.00379778014617
agg 1000 60 2.5 0.497616270637 0.000645250250779 0.00115732611026
agg 400 60 3.0 0.479531778622 0.00178897100363 0.00506970900851
agg 500 60 3.0 0.48204745542 0.00127712172707 0.00241358421681
agg 550 60 3.0 0.483540112625 0.00112707064025 0.00144365834444
agg 600 60 3.0 0.485104589224 0.00119998439137 0.00369774785925
agg 700 60 3.0 0.486804782179 0.00100111627192 0.0030076263417
agg 800 60 3.0 0.487901421883 0.000855472858421 0.00436348534747
agg 900 60 3.0 0.489151214681 0.0008498996263 0.00499374457172
agg 1000 60 3.0 0.489792964022 0.000657658860518 0.00195236355428
agg 400 60 4.0 0.466725015527 0.00190804823081 0.00746450656829
agg 500 60 4.0 0.4683111984 0.00136070454974 0.00112764347135
agg 550 60 4.0 0.46986450973 0.00119243088604 0.00189616087712
agg 600 60 4.0 0.471718851749 0.00124920314301 0.00661367403056
agg 700 60 4.0 0.472952146566 0.00103944837631 0.00297933884024
agg 800 60 4.0 0.473564410062 0.000887038455775 0.00519033370823
agg 900 60 4.0 0.474351835711 0.000879733509686 0.00469866312072
agg 1000 60 4.0 0.474768391166 0.000678108627992 0.00179267053924
agg 400 60 5.0 0.452959353901 0.00200745605931 0.00571140888462
agg 500 60 5.0 0.455265871002 0.00143981541807 0.00485441714835
agg 550 60 5.0 0.45656056398 0.00124318918343 0.00430560494542
agg 600 60 5.0 0.457365502174 0.001321181817 0.00606356470903
agg 700 60 5.0 0.458610106483 0.00109329477345 0.00411817939006
agg 800 60 5.0 0.459475944044 0.000924064261894 0.00586441623454
agg 900 60 5.0 0.460336192171 0.00090883334462 0.00713472319268
agg 1000 60 5.0 0.460379604384 0.000705408556596 0.00327622969275
agg 400 70 0.266 0.573245460748 0.0014103278593 0.00799649872346
agg 500 70 0.266 0.594119989027 0.000925031125716 0.00956672666938
agg 550 70 0.266 0.603775806108 0.000780704942881 0.00803073478071
agg 600 70 0.266 0.612815496229 0.000799015755486 0.0102267402572
agg 700 70 0.266 0.628780794435 0.000608088831878 0.00951104662747
agg 800 70 0.266 0.644336324417 0.000477071548113 0.0128934129241
agg 900 70 0.266 0.65873992341 0.000434704295596 0.0133649522695
agg 1000 70 0.266 0.671958273473 0.000309616644829 0.0110406905416
agg 400 70 0.375 0.527759066573 0.00158871307928 0.00448411718553
agg 500 70 0.375 0.541488622545 0.00107382788688 0.00312913483
agg 550 70 0.375 0.548125682618 0.000921436671892 0.00189767106961
agg 600 70 0.375 0.553611708826 0.000963262416204 0.00177295209678
agg 700 70 0.375 0.564135185056 0.000756635844104 0.00241517030475
agg 800 70 0.375 0.575122397926 0.00061145204323 0.00518654602683
agg 900 70 0.375 0.585450427706 0.000572057900385 0.0032703939826
agg 1000 70 0.375 0.59565821636 0.00041710955101 0.00246076898768
agg 400 70 0.5 0.515299488712 0.00162926133283 0.00348712997937
agg 500 70 0.5 0.525266471776 0.00111318547092 0.00190216450539
agg 550 70 0.5 0.52957313185 0.000965902814732 0.00163970358686
agg 600 70 0.5 0.533386016002 0.00101474131436 0.0032374450457
agg 700 70 0.5 0.54145143747 0.000808761980452 0.00354588002727
agg 800 70 0.5 0.54862002632 0.000665378396962 0.00358527815301
agg 900 70 0.5 0.555467103731 0.00063271569145 0.00255354381198
agg 1000 70 0.5 0.562651060564 0.000469130687974 0.00351239429502
agg 400 70 0.75 0.505247808807 0.00169113312293 0.00374529274448
agg 500 70 0.75 0.512491687666 0.00117648648874 0.00232183238773
agg 550 70 0.75 0.515818914521 0.00102415174066 0.00357565528224
agg 600 70 0.75 0.518236224369 0.00108434486375 0.00269858390131
agg 700 70 0.75 0.523239606381 0.000876094639407 0.0010225311427
agg 800 70 0.75 0.527916746115 0.000731642606647 0.0031945637843
agg 900 70 0.75 0.532355084618 0.000706764158364 0.00256709015426
agg 1000 70 0.75 0.536764381976 0.00053266335747 0.00217817132214
agg 400 70 1.0 0.499694536674 0.00174856925031 0.00270908955324
agg 500 70 1.0 0.506324125167 0.00122550683424 0.00237702647721
agg 550 70 1.0 0.508221425053 0.00107417509999 0.00173397282591
agg 600 70 1.0 0.510751879113 0.00114295504275 0.00262551618987
agg 700 70 1.0 0.514607099988 0.000933056762223 0.000481268818993
agg 800 70 1.0 0.518167656804 0.000785562631145 0.00279500222076
agg 900 70 1.0 0.521521421297 0.000765882373012 0.00432471080835
agg 1000 70 1.0 0.524899901437 0.000581664949544 0.00124199349122
agg 400 70 1.5 0.492484401822 0.00186349362161 0.000182216241507
agg 500 70 1.5 0.498478308377 0.00131361198798 0.00415618145261
agg 550 70 1.5 0.500007239986 0.00116008600372 0.000881050513201
agg 600 70 1.5 0.501839120431 0.0012425950096 0.00323597869843
agg 700 70 1.5 0.505123277535 0.00102484180143 0.00118127053847
agg 800 70 1.5 0.507160898244 0.000870892913987 0.0040925544162
agg 900 70 1.5 0.509471723456 0.000856609253438 0.00164663646054
agg 1000 70 1.5 0.511770439189 0.000653914443375 0.000350234689831
agg 400 70 2.0 0.487929354353 0.00196818080436 0.00275504457054
agg 500 70 2.0 0.49227265869 0.00141015350875 0.00426524144555
agg 550 70 2.0 0.493764305557 0.00123858407366 0.00173285236502
agg 600 70 2.0 0.495127968303 0.00132821344862 0.00196916845787
agg 700 70 2.0 0.497793607126 0.00109019365901 0.00223934345224
agg 800 70 2.0 0.499809233473 0.000926881768278 0.00277979356025
agg 900 70 2.0 0.501283844797 0.000910928605841 0.00499060244656
agg 1000 70 2.0 0.503100556849 0.000697527915458 0.00253166701533
agg 400 70 2.5 0.482150294587 0.00209365853471 0.00359930966213
agg 500 70 2.5 0.486801190047 0.00147140251475 0.00322428515591
agg 550 70 2.5 0.487936888798 0.00129260186229 0.00276560208748
agg 600 70 2.5 0.489319771398 0.00138857892711 0.00333821523739
agg 700 70 2.5 0.491130422673 0.00113301554626 0.00214862028567
agg 800 70 2.5 0.49311843069 0.000956022682469 0.00423312146128
agg 900 70 2.5 0.49404433994 0.000942847514007 0.00246849745047
agg 1000 70 2.5 0.495516266064 0.000720470433403 0.00114812457702
agg 400 70 3.0 0.47670827073 0.00220477377628 0.00507383899511
agg 500 70 3.0 0.480359879533 0.00153821633375 0.00405111621039
agg 550 70 3.0 0.481521649926 0.00134471695626 0.00290643039203
agg 600 70 3.0 0.482709768656 0.00142270756929 0.00248792201019
agg 700 70 3.0 0.485304095032 0.00116402634064 0.00338157790877
agg 800 70 3.0 0.485942527411 0.000982206933288 0.00366366275158
agg 900 70 3.0 0.487266751459 0.000960202700544 0.00414134422328
agg 1000 70 3.0 0.488062639548 0.000733384673013 0.00185028060462
agg 400 70 4.0 0.462990072671 0.00239904570528 0.00478632308542
agg 500 70 4.0 0.466897502145 0.00164776367374 0.00274028467423
agg 550 70 4.0 0.467782082463 0.00143725234086 0.00168847491806
agg 600 70 4.0 0.468895156406 0.00151981778627 0.0025814288065
agg 700 70 4.0 0.471807047379 0.0012038275928 0.0042078896309
agg 800 70 4.0 0.472121270308 0.00101899404128 0.0044203381745
agg 900 70 4.0 0.472767865702 0.000992140272807 0.00405475271606
agg 1000 70 4.0 0.473150411413 0.000762951964679 0.00289792034808
agg 400 70 5.0 0.450552598174 0.00253647691278 0.00631305630411
agg 500 70 5.0 0.453126414765 0.00175451440581 0.00506124616016
agg 550 70 5.0 0.454296380346 0.00153238166371 0.00376192542305
agg 600 70 5.0 0.455848940807 0.00158859870851 0.00538139536871
agg 700 70 5.0 0.457986345932 0.00127046547086 0.00548981481059
agg 800 70 5.0 0.458445375814 0.00106980413395 0.00650496015554
agg 900 70 5.0 0.458967304281 0.00104345483239 0.00516812955412
agg 1000 70 5.0 0.45924640446 0.000791538863116 0.00335570042278
agg 400 80 0.266 0.562681463668 0.00174562204602 0.00821873102924
agg 500 80 0.266 0.582899924389 0.00114016541476 0.0110102009615
agg 550 80 0.266 0.59137840259 0.000967343982715 0.00739863828149
agg 600 80 0.266 0.59929711143 0.000990596319869 0.0087219166443
agg 700 80 0.266 0.615269525968 0.000747794449981 0.00905077454089
agg 800 80 0.266 0.629478399451 0.000586100294808 0.0120054239759
agg 900 80 0.266 0.64305575816 0.000533113530065 0.0122528586584
agg 1000 80 0.266 0.655564248909 0.000378460933561 0.0106802796418
agg 400 80 0.375 0.520593129687 0.00194282635061 0.00294057042743
agg 500 80 0.375 0.533098609081 0.0013055958938 0.00321642773677
agg 550 80 0.375 0.53899170494 0.00111627052678 0.00255165187
agg 600 80 0.375 0.544706191259 0.00116205431949 0.00319453931046
agg 700 80 0.375 0.555022294129 0.000904207475738 0.00251270495522
agg 800 80 0.375 0.564592006298 0.000728070772016 0.00402849200168
agg 900 80 0.375 0.574058561127 0.000680853957255 0.00410736156628
agg 1000 80 0.375 0.582995615168 0.000495761933357 0.00247033582032
agg 400 80 0.5 0.509227037498 0.00199005341171 0.000392464434665
agg 500 80 0.5 0.519550755202 0.00134095533056 0.00118097917389
agg 550 80 0.5 0.523904320243 0.00115506708959 0.00361622792786
agg 600 80 0.5 0.527792956001 0.00120745975115 0.00206977431324
agg 700 80 0.5 0.534733606458 0.000954257474731 0.00104634368648
agg 800 80 0.5 0.541151955734 0.000780673034399 0.00244756241429
agg 900 80 0.5 0.54791791869 0.000737728985398 0.00303894181384
agg 1000 80 0.5 0.553805337221 0.000545663917751 0.00318124409501
agg 400 80 0.75 0.500185075928 0.00206218646889 0.00165498706219
agg 500 80 0.75 0.507789348516 0.00140881408405 0.00171566768344
agg 550 80 0.75 0.511844424577 0.00121455383613 0.000983936414658
agg 600 80 0.75 0.514063934197 0.00128038019335 0.00143989896305
agg 700 80 0.75 0.519063962074 0.00102115268387 0.00315663484579
agg 800 80 0.75 0.523513736134 0.000844172343157 0.00502552001169
agg 900 80 0.75 0.527612420184 0.000809781856982 0.00291413539838
agg 1000 80 0.75 0.531007623694 0.00060756387637 0.00190140297753
agg 400 80 1.0 0.49596502104 0.00211550326758 0.00209176830549
agg 500 80 1.0 0.502243021773 0.00145884691467 0.00399361652385
agg 550 80 1.0 0.505618268033 0.00126260081487 0.00138963560765
agg 600 80 1.0 0.507236340244 0.00133921362966 0.00225551566513
agg 700 80 1.0 0.511553410445 0.00107804309892 0.000704773891061
agg 800 80 1.0 0.514870924524 0.000898866703147 0.00276891499351
agg 900 80 1.0 0.51781505261 0.000868134765214 0.00285331388177
agg 1000 80 1.0 0.520740438487 0.000655600088598 0.00104713761751
agg 400 80 1.5 0.490134322068 0.00222099040872 0.00309380798806
agg 500 80 1.5 0.495034700278 0.00155477360172 0.00271292194701
agg 550 80 1.5 0.497166027062 0.00135411468491 0.00109415506438
agg 600 80 1.5 0.499583974819 0.00143444498519 0.00279553693404
agg 700 80 1.5 0.50254779656 0.00116908816289 0.000445802411038
agg 800 80 1.5 0.50500093469 0.000985112301535 0.00262471505332
agg 900 80 1.5 0.506788992636 0.000964332212915 0.00136553211248
agg 1000 80 1.5 0.50911688624 0.000730879089423 0.00139472393522
agg 400 80 2.0 0.483953556305 0.00235414939243 0.000740994944487
agg 500 80 2.0 0.489164710514 0.00165170453729 0.0005721468474
agg 550 80 2.0 0.491307332345 0.0014429289311 0.00117538189358
agg 600 80 2.0 0.492994112067 0.00153453176694 0.00224945043264
agg 700 80 2.0 0.496295381228 0.00124684845892 0.00280180591515
agg 800 80 2.0 0.498052414283 0.00104761719628 0.00343320442734
agg 900 80 2.0 0.499273435182 0.0010240545802 0.00229479337058
agg 1000 80 2.0 0.500875096536 0.000776835444309 0.00145271679902
agg 400 80 2.5 0.478408710217 0.00255081156646 0.00206196305344
agg 500 80 2.5 0.484474763129 0.00173919809005 0.00544139403698
agg 550 80 2.5 0.485594906912 0.00152239494465 0.00174314103156
agg 600 80 2.5 0.487092047853 0.0016090746246 0.00302558130651
agg 700 80 2.5 0.489923227978 0.00129868132182 0.00279707746884
agg 800 80 2.5 0.491302930364 0.001086721035 0.00415685007693
agg 900 80 2.5 0.49283236884 0.00105519187449 0.00361617434578
agg 1000 80 2.5 0.493870141566 0.000801650483145 0.00132979647247
agg 400 80 3.0 0.474031827094 0.002641919571 0.00930351732537
agg 500 80 3.0 0.478061201256 0.00185169482158 0.00261073016451
agg 550 80 3.0 0.479012702643 0.00158886382709 0.00279076805871
agg 600 80 3.0 0.481406983633 0.00166209363763 0.00367537930149
agg 700 80 3.0 0.483083151422 0.00134241029507 0.0016173422271
agg 800 80 3.0 0.484688753866 0.00111984145318 0.00452023057205
agg 900 80 3.0 0.485794531203 0.00108402283907 0.00299771332781
agg 1000 80 3.0 0.4870521707 0.000816982744372 0.00186215087016
agg 400 80 4.0 0.462406395149 0.00284056373192 0.00978154784554
agg 500 80 4.0 0.465349266321 0.0019536337745 0.00490852250386
agg 550 80 4.0 0.466872435074 0.00169392972775 0.0044259239611
agg 600 80 4.0 0.467551006784 0.00177201635534 0.00307697169677
agg 700 80 4.0 0.469506808374 0.00142637163134 0.00334902923985
agg 800 80 4.0 0.47071247714 0.00117586673538 0.00374152566182
agg 900 80 4.0 0.471760196363 0.00112845863532 0.00411449853678
agg 1000 80 4.0 0.472459842028 0.000849221649084 0.00302551787997
agg 400 80 5.0 0.446816367673 0.00311884929058 0.00387614460165
agg 500 80 5.0 0.452325406702 0.00206668309902 0.00711488010638
agg 550 80 5.0 0.452687636295 0.00181831638971 0.00452964960588
agg 600 80 5.0 0.454477593085 0.00188879874863 0.00659721889973
agg 700 80 5.0 0.456762537016 0.00149178317661 0.00581233847147
agg 800 80 5.0 0.45721915957 0.00124913942252 0.00575175984616
agg 900 80 5.0 0.458113174505 0.00118618104008 0.00507299874969
agg 1000 80 5.0 0.458437522573 0.000891161660233 0.00373229837526
agg 400 90 0.266 0.551807771009 0.00212034464143 0.00561562378757
agg 500 90 0.266 0.572310211373 0.00136358960863 0.00980770631501
agg 550 90 0.266 0.580462443173 0.00115143167127 0.00641958454531
agg 600 90 0.266 0.588997099887 0.0011736565774 0.0088902955708
agg 700 90 0.266 0.604222657202 0.000885618493026 0.00860578293991
agg 800 90 0.266 0.617539616584 0.000692666575117 0.0113781278631
agg 900 90 0.266 0.630396787808 0.000628401547894 0.0117631961095
agg 1000 90 0.266 0.642544910752 0.000445438426826 0.0107035979474
agg 400 90 0.375 0.514504643157 0.00229312662531 0.00279666206757
agg 500 90 0.375 0.52679511566 0.00153536218783 0.0024208561412
agg 550 90 0.375 0.53209201968 0.00131101150351 0.00212380942944
agg 600 90 0.375 0.537029034762 0.0013594760896 0.00148657832616
agg 700 90 0.375 0.546953220121 0.00105159994888 0.00226583541646
agg 800 90 0.375 0.556298325676 0.000842090824879 0.0048097984729
agg 900 90 0.375 0.564900267147 0.00078507918866 0.00420555622908
agg 1000 90 0.375 0.5730506654 0.000570225165848 0.00263188830413
agg 400 90 0.5 0.503581958824 0.0023535889023 0.00233424274523
agg 500 90 0.5 0.512800021739 0.00158295177699 0.000820718798179
agg 550 90 0.5 0.518113966044 0.00135074282367 0.00208691758001
agg 600 90 0.5 0.522719978661 0.00139853872211 0.00104746020441
agg 700 90 0.5 0.528893179545 0.00109957487254 0.00222655274811
agg 800 90 0.5 0.535425402287 0.000892089806361 0.00356251016045
agg 900 90 0.5 0.54133667001 0.000839249139012 0.00329332254859
agg 1000 90 0.5 0.547152544989 0.000616801084164 0.00271774497201
agg 400 90 0.75 0.495995304191 0.00243180705054 0.00174601900634
agg 500 90 0.75 0.503133904592 0.00164452315167 0.00093322864286
agg 550 90 0.75 0.507607485824 0.00141323551649 0.00244400176645
agg 600 90 0.75 0.509937137607 0.00147511140426 0.00155626788256
agg 700 90 0.75 0.51523213633 0.00116735003628 0.00205341070203
agg 800 90 0.75 0.5190311088 0.000958623761794 0.0047397047961
agg 900 90 0.75 0.523504552438 0.000909968472003 0.00110825262456
agg 1000 90 0.75 0.527097991516 0.000677235077717 0.00229865094588
agg 400 90 1.0 0.49170160165 0.00248632666929 0.00246967523167
agg 500 90 1.0 0.499369372382 0.00168815377668 0.00559814336098
agg 550 90 1.0 0.501073237182 0.00146577003093 0.00140987050119
agg 600 90 1.0 0.50437982381 0.00153273341686 0.00264588335477
agg 700 90 1.0 0.508655115094 0.00122226373566 0.0012709916052
agg 800 90 1.0 0.511977200419 0.00100951629759 0.00217047004817
agg 900 90 1.0 0.514249701658 0.00096885832681 0.00108482472022
agg 1000 90 1.0 0.517568227063 0.000725391430473 0.00103123633099
agg 400 90 1.5 0.486541056981 0.00260299515032 0.00442466746255
agg 500 90 1.5 0.492978507723 0.00179224496132 0.00344017882893
agg 550 90 1.5 0.495002558088 0.00154984494912 0.00144728550377
agg 600 90 1.5 0.497411228163 0.00163069867102 0.00369809840705
agg 700 90 1.5 0.499848580613 0.00132321792822 0.00225708987646
agg 800 90 1.5 0.503017970257 0.00109973146549 0.00380558975342
agg 900 90 1.5 0.504615802808 0.00106563698591 0.00386471394932
agg 1000 90 1.5 0.506636330974 0.000803419778845 0.000470006178761
agg 400 90 2.0 0.480964093763 0.00274903395375 0.00325042070803
agg 500 90 2.0 0.486761699462 0.00190809153635 0.00331504476116
agg 550 90 2.0 0.489459173999 0.00165596372789 0.00232381845691
agg 600 90 2.0 0.491029143539 0.00175163870431 0.00213153486191
agg 700 90 2.0 0.493589689363 0.00141783463626 0.00258194368811
agg 800 90 2.0 0.496244420935 0.00117183269431 0.0032902814739
agg 900 90 2.0 0.49804342905 0.00113654472103 0.00378522326176
agg 1000 90 2.0 0.499023699236 0.000854400079023 0.00104388439533
agg 400 90 2.5 0.477087118909 0.00290922013528 0.00542142844173
agg 500 90 2.5 0.480925268743 0.00203953283628 0.00225439692138
agg 550 90 2.5 0.483326398605 0.00177081736006 0.00170055473005
agg 600 90 2.5 0.484777648882 0.00184293875522 0.00186615221492
agg 700 90 2.5 0.487553731755 0.00149061158387 0.00144390086001
agg 800 90 2.5 0.489592775396 0.00122335151122 0.00411324788914
agg 900 90 2.5 0.491006409222 0.00117422357363 0.0025232391857
agg 1000 90 2.5 0.492295490264 0.000883909104052 0.00105828461728
agg 400 90 3.0 0.469406093455 0.00320599788687 0.00380926297061
agg 500 90 3.0 0.476080550677 0.00211262608269 0.00430473522674
agg 550 90 3.0 0.477927413559 0.00182001768087 0.00358108175389
agg 600 90 3.0 0.479008969424 0.00192376369056 0.00323646459019
agg 700 90 3.0 0.481551582007 0.00154464161871 0.00280035168027
agg 800 90 3.0 0.482749325984 0.00126191663133 0.00295153578242
agg 900 90 3.0 0.484367036339 0.00120540623482 0.00255602365418
agg 1000 90 3.0 0.485695103155 0.00090309712144 0.00231672094427
agg 400 90 4.0 0.458108770811 0.00336736402041 0.00644591326316
agg 500 90 4.0 0.463066648443 0.00228652699813 0.0037087634839
agg 550 90 4.0 0.464142175406 0.00198140282649 0.00369373584279
agg 600 90 4.0 0.466145812712 0.00206984714409 0.00495995662733
agg 700 90 4.0 0.468210244535 0.00164477562334 0.00315958094118
agg 800 90 4.0 0.469413790625 0.00134597216829 0.00431139904814
agg 900 90 4.0 0.470919626563 0.00127307186062 0.00512193841561
agg 1000 90 4.0 0.471363336315 0.000952304965295 0.00315158915896
agg 400 90 5.0 0.444676242498 0.00361633127277 0.00635445853947
agg 500 90 5.0 0.449275834457 0.00248414428103 0.00502103199351
agg 550 90 5.0 0.450195807902 0.00211148952841 0.00478741649565
agg 600 90 5.0 0.452796248675 0.00218784589969 0.00572110671694
agg 700 90 5.0 0.454362976334 0.00174841571514 0.00304727125587
agg 800 90 5.0 0.455989229539 0.0014082392095 0.00590158196804
agg 900 90 5.0 0.45739378481 0.00134778379408 0.00608895298356
agg 1000 90 5.0 0.457135650001 0.000992813865264 0.00329272884837
col 400 5 0.266 0.958368078311 2.36209563057e-05 0.0517130511817
col 500 5 0.266 0.973413097501 1.54882768955e-05 0.00396069555435
col 550 5 0.266 0.977702080234 1.30299091477e-05 0.00323529814575
col 600 5 0.266 0.981470072176 1.3174183791e-05 0.0122651751272
col 700 5 0.266 0.986111249357 9.5203601827e-06 0.0196521559697
col 800 5 0.266 0.989662570843 7.26068991655e-06 0.0312406030999
col 900 5 0.266 0.991666514085 7.72076023382e-06 0.0243859993163
col 1000 5 0.266 0.993221004302 4.26932727964e-06 0.0198688803335
col 400 5 0.375 0.924252353835 4.2571978284e-05 0.0529704979583
col 500 5 0.375 0.950195934357 2.84259119026e-05 0.00634925404717
col 550 5 0.375 0.957802701436 2.4113884514e-05 0.00538112079468
col 600 5 0.375 0.964652057481 2.453493792e-05 0.0129346694548
col 700 5 0.375 0.973182270734 1.79575099773e-05 0.0212650320466
col 800 5 0.375 0.979821388493 1.38178020546e-05 0.0316214958539
col 900 5 0.375 0.983643587971 1.28338627574e-05 0.0254170504217
col 1000 5 0.375 0.986608774791 8.22693444808e-06 0.0200493966219
col 400 5 0.5 0.881173388073 6.75721032325e-05 0.0543002358494
col 500 5 0.5 0.919114617896 4.60424752201e-05 0.00857539112046
col 550 5 0.5 0.930549216038 3.9375439109e-05 0.00763524635046
col 600 5 0.5 0.941272970275 4.03275937567e-05 0.0141997013774
col 700 5 0.5 0.954774364717 2.99108988659e-05 0.0232853212099
col 800 5 0.5 0.965671418027 2.32328874293e-05 0.0324926589796
col 900 5 0.5 0.971930034515 2.08600560985e-05 0.0268894860234
col 1000 5 0.5 0.976935033914 1.40360256096e-05 0.0206781087353
col 400 5 0.75 0.79932289756 0.000117178396614 0.0526675348894
col 500 5 0.75 0.85328124048 8.54220416934e-05 0.00971753449553
col 550 5 0.75 0.870670039795 7.43956761254e-05 0.00963052295455
col 600 5 0.75 0.888032940003 7.74111968025e-05 0.0157528763467
col 700 5 0.75 0.910736438481 5.88516331548e-05 0.0263134260625
col 800 5 0.75 0.930486251533 4.65393862461e-05 0.0339782433664
col 900 5 0.75 0.942112658269 4.15578544726e-05 0.0299001334222
col 1000 5 0.75 0.951772888152 2.8845092962e-05 0.022077820698
col 400 5 1.0 0.734259885884 0.000148019164033 0.0498244862578
col 500 5 1.0 0.794058540887 0.000120805932672 0.00748014584149
col 550 5 1.0 0.813979359554 0.000109338963749 0.00827324302446
col 600 5 1.0 0.835575231802 0.000115996429989 0.0152701054865
col 700 5 1.0 0.86419101038 9.09027345633e-05 0.0271100995943
col 800 5 1.0 0.891406706151 7.35107553322e-05 0.0350200229335
col 900 5 1.0 0.907604617351 6.62033284091e-05 0.0320183845464
col 1000 5 1.0 0.92189612354 4.67327955914e-05 0.0232847972052
col 400 5 1.5 0.650190235193 0.000198843712246 0.050975043706
col 500 5 1.5 0.707693764937 0.000161682390003 0.00183041936517
col 550 5 1.5 0.726914858373 0.000150082693113 0.00298607256065
col 600 5 1.5 0.750326120235 0.000166171204219 0.0121920937593
col 700 5 1.5 0.781898025142 0.000143446291508 0.0243181755656
col 800 5 1.5 0.816839826141 0.000125180502297 0.0342203309074
col 900 5 1.5 0.837792317602 0.000118109195658 0.0325275948923
col 1000 5 1.5 0.858727878552 8.63637334841e-05 0.0240441015466
col 400 5 2.0 0.601445365609 0.000245754329055 0.0532508260617
col 500 5 2.0 0.652748545821 0.000196797024547 0.00442117561882
col 550 5 2.0 0.66922314672 0.000182185165096 0.00324522136423
col 600 5 2.0 0.691740316374 0.000200407800524 0.0106369428785
col 700 5 2.0 0.72063839598 0.000173684968784 0.0201160822046
col 800 5 2.0 0.756604042623 0.000152767784184 0.0318104424833
col 900 5 2.0 0.777804541365 0.000152041295899 0.0298829480818
col 1000 5 2.0 0.801406254832 0.000119106766863 0.0228535597325
col 400 5 2.5 0.570749548445 0.00028710590564 0.0533147908736
col 500 5 2.5 0.616210789647 0.000230002562559 0.00554027381418
col 550 5 2.5 0.630308546825 0.000213489909694 0.00499063446474
col 600 5 2.5 0.651084339789 0.000233178541619 0.0128811367385
col 700 5 2.5 0.676204827494 0.000201105934441 0.0201358512558
col 800 5 2.5 0.710911090296 0.000175039467966 0.0294288306205
col 900 5 2.5 0.730558701456 0.000174877876678 0.0271326174316
col 1000 5 2.5 0.754178979478 0.000137904527578 0.0207338092163
col 400 5 3.0 0.550240632406 0.000325192251802 0.0521736875269
col 500 5 3.0 0.590746835538 0.000259789935829 0.00627876710292
col 550 5 3.0 0.602811114707 0.000241860911689 0.00519764755028
col 600 5 3.0 0.621754794716 0.000264746262671 0.0138017543687
col 700 5 3.0 0.643668699784 0.000228631801413 0.0218253107352
col 800 5 3.0 0.675837541285 0.000196540514657 0.0302268456546
col 900 5 3.0 0.693367740206 0.000196557393184 0.0250574123001
col 1000 5 3.0 0.716010828278 0.000154119576467 0.0189266956019
col 400 5 4.0 0.524132506548 0.000390361789894 0.0497165872995
col 500 5 4.0 0.557657976032 0.000314781411871 0.00476233188755
col 550 5 4.0 0.566997543024 0.000295367875157 0.0045320028547
col 600 5 4.0 0.583269422192 0.000323783260828 0.0131417964066
col 700 5 4.0 0.599804729183 0.000279500230177 0.022360750961
col 800 5 4.0 0.627253891546 0.000239143888901 0.0313167491039
col 900 5 4.0 0.641247876605 0.000240242449315 0.0266014688629
col 1000 5 4.0 0.660168222109 0.000185558848611 0.0183111434048
col 400 5 5.0 0.50783233658 0.000438440662315 0.0470511657029
col 500 5 5.0 0.537392111209 0.000362968676488 0.00341841857561
col 550 5 5.0 0.544891411096 0.000339600088099 0.00189571959859
col 600 5 5.0 0.559541881543 0.000375055573286 0.011120172845
col 700 5 5.0 0.57249557663 0.000328128636943 0.0206537272051
col 800 5 5.0 0.595536233949 0.000278888398055 0.0306056115772
col 900 5 5.0 0.606997823238 0.00028114388816 0.0273417341709
col 1000 5 5.0 0.622620343969 0.00021666883551 0.0183174123734
col 400 10 0.266 0.880053670462 5.26019820059e-05 0.0136844543351
col 500 10 0.266 0.912888765151 3.57566864834e-05 0.0195881060134
col 550 10 0.266 0.924398944307 3.05834732244e-05 0.00980384183911
col 600 10 0.266 0.934593953462 3.14385722534e-05 0.0138476041904
col 700 10 0.266 0.948951419536 2.33677501963e-05 0.0197805933447
col 800 10 0.266 0.959450749717 1.8101403852e-05 0.0244948552957
col 900 10 0.266 0.967561066929 1.65745450034e-05 0.0246316681927
col 1000 10 0.266 0.972604769744 1.11394256264e-05 0.0131762388828
col 400 10 0.375 0.807246434917 8.78060477201e-05 0.0134064527001
col 500 10 0.375 0.853366553573 6.04407239087e-05 0.0212837329212
col 550 10 0.375 0.870312279507 5.21215386662e-05 0.0120611814798
col 600 10 0.375 0.886106946533 5.39547501853e-05 0.0151973373113
col 700 10 0.375 0.908744536615 4.06922029005e-05 0.0227389223826
col 800 10 0.375 0.92621313782 3.19489407457e-05 0.0257493620207
col 900 10 0.375 0.939971641749 2.88607651928e-05 0.0272947981621
col 1000 10 0.375 0.948746943082 2.00749973874e-05 0.0142812489939
col 400 10 0.5 0.736785918372 0.000124310430395 0.00997755836053
col 500 10 0.5 0.789779225397 9.08541431039e-05 0.019224968117
col 550 10 0.5 0.810473265665 7.89395853132e-05 0.0112620522499
col 600 10 0.5 0.830540978763 8.22081353389e-05 0.0151947764342
col 700 10 0.5 0.860108877427 6.28626538342e-05 0.0240003494409
col 800 10 0.5 0.884339032712 4.99651361432e-05 0.0269483670436
col 900 10 0.5 0.904029777588 4.52835995213e-05 0.029439179254
col 1000 10 0.5 0.916857608721 3.19674160994e-05 0.0156674702359
col 400 10 0.75 0.641828606754 0.000178935169571 0.00723793727876
col 500 10 0.75 0.693888196357 0.00013847300341 0.0113875980557
col 550 10 0.75 0.715450050137 0.000125344525489 0.00468161702287
col 600 10 0.75 0.738505810095 0.000135618697409 0.0112831272844
col 700 10 0.75 0.77283548969 0.000109971723878 0.0207091725972
col 800 10 0.75 0.804712224529 8.9216682156e-05 0.0256656027712
col 900 10 0.75 0.831447842598 8.18877804127e-05 0.0294770292295
col 1000 10 0.75 0.84965197837 5.87242382798e-05 0.0161849672045
col 400 10 1.0 0.586984291248 0.000209991512204 0.0117168050299
col 500 10 1.0 0.632615656416 0.000174022428767 0.0134024351946
col 550 10 1.0 0.651688502478 0.000160756117569 0.00369457030051
col 600 10 1.0 0.674536858885 0.00017534847282 0.00931153569294
col 700 10 1.0 0.707432877039 0.000146412888729 0.0155091630756
col 800 10 1.0 0.74161842163 0.000125385544834 0.0227370542065
col 900 10 1.0 0.769859851521 0.000119619359241 0.0265539439155
col 1000 10 1.0 0.789518682784 8.73271964645e-05 0.0142846982008
col 400 10 1.5 0.531426178338 0.000256563712116 0.0123391651252
col 500 10 1.5 0.565638596877 0.000212017987125 0.0157374918627
col 550 10 1.5 0.579317550101 0.0001990842103 0.00774340802575
col 600 10 1.5 0.599420227099 0.000222248587387 0.0146238729085
col 700 10 1.5 0.625299927258 0.000196873563766 0.018558792714
col 800 10 1.5 0.658601796549 0.000175921833782 0.0234780896245
col 900 10 1.5 0.683764907288 0.000173521583192 0.0229115868723
col 1000 10 1.5 0.70177395305 0.000132744014067 0.00978747806493
col 400 10 2.0 0.505190777972 0.000298307899362 0.00976999813394
col 500 10 2.0 0.532080023166 0.00024305653658 0.0145539676981
col 550 10 2.0 0.542131533674 0.000227394320067 0.006903728349
col 600 10 2.0 0.559620518106 0.000251878075775 0.0149349731787
col 700 10 2.0 0.579270574736 0.000223420594451 0.019708429993
col 800 10 2.0 0.610024017302 0.000199578548281 0.0257765931627
col 900 10 2.0 0.630545534114 0.000203768410204 0.025829056655
col 1000 10 2.0 0.645942045188 0.000163275514194 0.013469959667
col 400 10 2.5 0.488649064573 0.000338425738552 0.00891270949061
col 500 10 2.5 0.512748403999 0.000272628668415 0.0127034948447
col 550 10 2.5 0.520487176891 0.000254928718215 0.00476423256641
col 600 10 2.5 0.536014969933 0.000280387005769 0.0137583890047
col 700 10 2.5 0.551491658697 0.000246889817703 0.0183353221056
col 800 10 2.5 0.579456954693 0.000217745725629 0.0260668750751
col 900 10 2.5 0.596135842696 0.00022256141072 0.0266643352998
col 1000 10 2.5 0.608912695494 0.000179104418742 0.0151599987751
col 400 10 3.0 0.478453196599 0.000375975584706 0.00696653318139
col 500 10 3.0 0.499178693694 0.000301779662829 0.0117733989791
col 550 10 3.0 0.505809825105 0.000281682320474 0.00366805132783
col 600 10 3.0 0.520778392472 0.000308437989454 0.0119321321005
col 700 10 3.0 0.53310726181 0.000270772825138 0.0180329451176
col 800 10 3.0 0.558665186263 0.000235681444408 0.0253408946963
col 900 10 3.0 0.572634048149 0.000240215360648 0.0261538536542
col 1000 10 3.0 0.583440173235 0.000192259974749 0.0152587967253
col 400 10 4.0 0.464835180885 0.000446186503242 0.0044679640026
col 500 10 4.0 0.482535990867 0.000357432262673 0.010378325614
col 550 10 4.0 0.487439576329 0.00033497221738 0.0014325103122
col 600 10 4.0 0.500543360951 0.000366649499901 0.00966542647759
col 700 10 4.0 0.50977703453 0.00031851330047 0.015570186318
col 800 10 4.0 0.533537811395 0.000272396298433 0.0225935433662
col 900 10 4.0 0.543459573167 0.000277166968504 0.0230584287508
col 1000 10 4.0 0.55083676383 0.000218337192148 0.0131928339893
col 400 10 5.0 0.455816633168 0.000501875166997 0.00310787485062
col 500 10 5.0 0.47198403012 0.000409963829145 0.0106918972694
col 550 10 5.0 0.475976125434 0.000382253383403 0.00189454308565
col 600 10 5.0 0.488518110862 0.000419804278415 0.00852693959578
col 700 10 5.0 0.495664365367 0.000367087764195 0.0142500132234
col 800 10 5.0 0.517133926532 0.000310688988255 0.0205122212739
col 900 10 5.0 0.525530121748 0.000314955296768 0.0215239806682
col 1000 10 5.0 0.531537164151 0.000245381382313 0.0104339481446
col 400 15 0.266 0.8134254466 8.86008159706e-05 0.0208201577543
col 500 15 0.266 0.854088992619 6.13492973044e-05 0.0235592937733
col 550 15 0.266 0.869238097533 5.29737364893e-05 0.0141164162574
col 600 15 0.266 0.882886434565 5.49187917624e-05 0.0172348826493
col 700 15 0.266 0.904758557926 4.16049867135e-05 0.0201986521796
col 800 15 0.266 0.920765515499 3.2678681948e-05 0.0163261176052
col 900 15 0.266 0.934367659349 2.96116405221e-05 0.0242738812672
col 1000 15 0.266 0.943853957432 2.07964403507e-05 0.00962067904931
col 400 15 0.375 0.724418257916 0.000133513598306 0.0143732568059
col 500 15 0.375 0.77393083957 9.75230573454e-05 0.0207920500443
col 550 15 0.375 0.793459733442 8.59587776656e-05 0.012809370032
col 600 15 0.375 0.811667111112 8.9989630476e-05 0.0172673931486
col 700 15 0.375 0.842032281521 6.89738317712e-05 0.0214744669387
col 800 15 0.375 0.865517854445 5.48396261775e-05 0.0173727190979
col 900 15 0.375 0.886114917401 4.98537592345e-05 0.0269228892738
col 1000 15 0.375 0.900929844439 3.55970919157e-05 0.0111459588563
col 400 15 0.5 0.652576214633 0.000173225077613 0.0060793852528
col 500 15 0.5 0.70179548977 0.000131288624959 0.0143214117046
col 550 15 0.5 0.722202164415 0.000117353987443 0.00720963665307
col 600 15 0.5 0.742424288872 0.000125900679443 0.013950913081
col 700 15 0.5 0.776704401034 0.000100944758681 0.0188574315516
col 800 15 0.5 0.805174249107 8.18870324637e-05 0.0164052959238
col 900 15 0.5 0.830951920964 7.50983768006e-05 0.0269804381121
col 1000 15 0.5 0.850038474736 5.41485157656e-05 0.0117321497769
col 400 15 0.75 0.572677167661 0.000227494017195 0.0103197219846
col 500 15 0.75 0.612160939173 0.000178417091068 0.0134667727053
col 550 15 0.75 0.6295471867 0.000163721597033 0.00452378678903
col 600 15 0.75 0.64829084576 0.000180120692735 0.0109633017769
col 700 15 0.75 0.680325741932 0.000150902197826 0.010255019577
col 800 15 0.75 0.710377932059 0.000127797632748 0.0109105933086
col 900 15 0.75 0.738858657764 0.000122468009277 0.0215239795506
col 1000 15 0.75 0.760508776141 9.12932858092e-05 0.00906346513032
col 400 15 1.0 0.532691406598 0.000272764961308 0.0116831080249
col 500 15 1.0 0.564027638482 0.000214313512349 0.0154550874984
col 550 15 1.0 0.577743898486 0.000196691212024 0.00688165046535
col 600 15 1.0 0.593886641381 0.000217370110324 0.0152732039599
col 700 15 1.0 0.620613936028 0.000185772257794 0.0139780291004
col 800 15 1.0 0.648247137379 0.000163261813329 0.0130021421966
col 900 15 1.0 0.674292273659 0.000160350212889 0.0182138173207
col 1000 15 1.0 0.694278506399 0.000120959104547 0.00442119995484
col 400 15 1.5 0.494261881465 0.000352082235736 0.00876671188064
col 500 15 1.5 0.51607079302 0.000281244162025 0.0146531699892
col 550 15 1.5 0.525149991357 0.000257169894199 0.00630728593017
col 600 15 1.5 0.538134226767 0.000282823345218 0.0157311019719
col 700 15 1.5 0.556650722823 0.00024098615425 0.0146187618887
col 800 15 1.5 0.579632239244 0.000212289492213 0.0165802861969
col 900 15 1.5 0.599230325819 0.000210817577833 0.0227161087856
col 1000 15 1.5 0.613986913766 0.000164181619746 0.0100958105628
col 400 15 2.0 0.476483035817 0.000424222177168 0.00698927794307
col 500 15 2.0 0.49321080932 0.000339456861399 0.0129145424506
col 550 15 2.0 0.499653457355 0.00031257518142 0.00414358676269
col 600 15 2.0 0.510332316873 0.000344862979236 0.0141961010142
col 700 15 2.0 0.523853003996 0.000293265588989 0.0141897440618
col 800 15 2.0 0.544476073489 0.00025583560245 0.0157801985861
col 900 15 2.0 0.559566297396 0.000253015787802 0.0218663733076
col 1000 15 2.0 0.570420103579 0.000197424621412 0.011102888662
col 400 15 2.5 0.465481136083 0.000468033363003 0.00733426094217
col 500 15 2.5 0.480150705316 0.000394820779258 0.0113781206069
col 550 15 2.5 0.485020762993 0.000368030619021 0.0024540349857
col 600 15 2.5 0.49447090273 0.000400656396704 0.0122659569371
col 700 15 2.5 0.504785436383 0.000341479845732 0.0123688394639
col 800 15 2.5 0.522891838051 0.000298068956784 0.014748825866
col 900 15 2.5 0.534958851738 0.000293370622388 0.019668412824
col 1000 15 2.5 0.544186097362 0.000228829508699 0.00992319985256
col 400 15 3.0 0.458413077942 0.000526145981575 0.0065486852937
col 500 15 3.0 0.470842060818 0.000426889964493 0.0110637959579
col 550 15 3.0 0.475319046647 0.000403448285711 0.000859656377536
col 600 15 3.0 0.484055702546 0.000452455958524 0.0111297437798
col 700 15 3.0 0.492349055774 0.000389720383068 0.0111531427366
col 800 15 3.0 0.509001178458 0.000334399790608 0.0131850792033
col 900 15 3.0 0.518895329264 0.000332943335831 0.0209946248827
col 1000 15 3.0 0.525750423465 0.000259820755938 0.00934005258487
col 400 15 4.0 0.448683353813 0.000603282202736 0.00575859572309
col 500 15 4.0 0.459483178656 0.00050631818565 0.0113265502959
col 550 15 4.0 0.462844784373 0.000479419523196 0.00114980875332
col 600 15 4.0 0.470478985103 0.000524405524894 0.00906323092425
col 700 15 4.0 0.476386421245 0.00045744589633 0.00894219454335
col 800 15 4.0 0.4917101207 0.000408397538262 0.0108281941108
col 900 15 4.0 0.499017066445 0.000408946272563 0.0173559001445
col 1000 15 4.0 0.503699994502 0.000314300054124 0.00650874026152
col 400 15 5.0 0.442275812815 0.000668809919407 0.00776220727198
col 500 15 5.0 0.452306255612 0.000566075012117 0.0121043280464
col 550 15 5.0 0.454578983122 0.000531676537543 0.00293578035904
col 600 15 5.0 0.461736099707 0.000594961376101 0.00856756175816
col 700 15 5.0 0.466983167483 0.000528693852309 0.0112761470987
col 800 15 5.0 0.48070141854 0.000452861876906 0.00827991803794
col 900 15 5.0 0.486970892845 0.000461530322466 0.0178386314592
col 1000 15 5.0 0.490470391119 0.000367069191756 0.00567851147805
col 400 20 0.266 0.763252411211 0.000125742262171 0.0231732817377
col 500 20 0.266 0.805627243451 8.94520545139e-05 0.02329767471
col 550 20 0.266 0.822152872757 7.73399564524e-05 0.0159824249784
col 600 20 0.266 0.837104502977 8.02470870292e-05 0.0172710701954
col 700 20 0.266 0.86316264475 6.11210260644e-05 0.0208101219611
col 800 20 0.266 0.882669329202 4.82714003925e-05 0.0121940866661
col 900 20 0.266 0.899959407397 4.38615701371e-05 0.0259575379229
col 1000 20 0.266 0.912686812516 3.12299636147e-05 0.00852612498113
col 400 20 0.375 0.669859229522 0.000177935137171 0.0126502757622
col 500 20 0.375 0.71664658987 0.000132769680832 0.0164011390115
col 550 20 0.375 0.735874073254 0.000118593900232 0.0105045839467
col 600 20 0.375 0.753928960368 0.000126144756372 0.0145039232143
col 700 20 0.375 0.786587828872 9.89209777403e-05 0.0189076060209
col 800 20 0.375 0.812300945134 7.89143740215e-05 0.01188181867
col 900 20 0.375 0.83621240875 7.19630774651e-05 0.0269143391444
col 1000 20 0.375 0.854302987592 5.18000645925e-05 0.00947810535169
col 400 20 0.5 0.60375071935 0.000223801095268 0.00891269912556
col 500 20 0.5 0.646414506929 0.00016762908754 0.00819156502009
col 550 20 0.5 0.664903525079 0.000151384292547 0.00301402522508
col 600 20 0.5 0.682942308733 0.000164410863628 0.00948782082606
col 700 20 0.5 0.716491281917 0.000134985055065 0.013655263247
col 800 20 0.5 0.744386419987 0.000112433506845 0.00913501792919
col 900 20 0.5 0.771417182996 0.000105412107273 0.0242056838281
col 1000 20 0.5 0.792527693917 7.67452514811e-05 0.00822799587608
col 400 20 0.75 0.53762618379 0.000294652459798 0.0123770120799
col 500 20 0.75 0.568726443825 0.000226639349336 0.0134426843609
col 550 20 0.75 0.582845761829 0.000205179856897 0.00585725478691
col 600 20 0.75 0.597823375705 0.000222543545762 0.0120717965576
col 700 20 0.75 0.625625901756 0.000184549192763 0.0112773937592
col 800 20 0.75 0.651450305808 0.000158809089796 0.0053685672009
col 900 20 0.75 0.677343947844 0.000155343063423 0.0159887850154
col 1000 20 0.75 0.698397246604 0.000118027419077 0.00292125222517
col 400 20 1.0 0.506633511984 0.00035212443299 0.0108023134528
col 500 20 1.0 0.5302718748 0.000275394744034 0.0126731402676
col 550 20 1.0 0.540840167572 0.000251168356997 0.00696720671482
col 600 20 1.0 0.552804052317 0.000275454888969 0.0144865336818
col 700 20 1.0 0.574429375953 0.000230331565656 0.0130383594697
col 800 20 1.0 0.596414547672 0.000197817048028 0.0101214864725
col 900 20 1.0 0.618786370631 0.000192712518572 0.019923507966
col 1000 20 1.0 0.636693314179 0.000146891573097 0.00480872200018
col 400 20 1.5 0.477174022239 0.000441266787443 0.00988011313401
col 500 20 1.5 0.493396575987 0.000355006401899 0.0115831857105
col 550 20 1.5 0.500198197943 0.000327637440856 0.00458981548269
col 600 20 1.5 0.509345456564 0.000364360634677 0.0127648080436
col 700 20 1.5 0.523634932613 0.00030986417345 0.0131948251268
col 800 20 1.5 0.540206847393 0.000269002505928 0.0110772974405
col 900 20 1.5 0.555752642739 0.000264007407113 0.0204407626538
col 1000 20 1.5 0.567797122584 0.000202361417735 0.00914895626749
col 400 20 2.0 0.463796359553 0.000521327090061 0.0093320967602
col 500 20 2.0 0.475703107882 0.000421967988782 0.00837256594551
col 550 20 2.0 0.48075211965 0.000393330034242 0.00319509405598
col 600 20 2.0 0.488020223721 0.000436021557607 0.0111761158014
col 700 20 2.0 0.49850862931 0.000371252552583 0.0104161315575
col 800 20 2.0 0.513018021585 0.000330301044006 0.00897325494603
col 900 20 2.0 0.524742764915 0.000326554595374 0.0197808411366
col 1000 20 2.0 0.533089182687 0.000250958840074 0.00806433433489
col 400 20 2.5 0.455251905149 0.000565762851946 0.00799223339433
col 500 20 2.5 0.465641539004 0.000486427729526 0.00799793590538
col 550 20 2.5 0.469215998675 0.000454848704799 0.00348720889195
col 600 20 2.5 0.475645974943 0.000498075757792 0.00958807429277
col 700 20 2.5 0.483589297893 0.000431033962175 0.0084692289724
col 800 20 2.5 0.496361591437 0.00037749971293 0.00755614972662
col 900 20 2.5 0.505679220803 0.000374011363474 0.0186396303727
col 1000 20 2.5 0.512714215859 0.000294578210331 0.00638732405654
col 400 20 3.0 0.449776621287 0.000635434956795 0.0097667476471
col 500 20 3.0 0.45852227473 0.00051940254342 0.00652162309454
col 550 20 3.0 0.461805483746 0.000496358315267 0.00169278275803
col 600 20 3.0 0.467587286 0.000559212170099 0.00850249968369
col 700 20 3.0 0.473968620327 0.000483496788059 0.00818045884518
col 800 20 3.0 0.485571874362 0.000422319813214 0.00605773760837
col 900 20 3.0 0.493134067659 0.000422817946483 0.0171185371797
col 1000 20 3.0 0.498575114058 0.000328357565503 0.00534561815061
col 400 20 4.0 0.441858308888 0.000716482495635 0.00846642514215
col 500 20 4.0 0.449603484368 0.00060937998355 0.0085111621582
col 550 20 4.0 0.451652958706 0.000582342074419 0.00214103128353
col 600 20 4.0 0.456340242588 0.000635720236671 0.0078677046575
col 700 20 4.0 0.461946020998 0.000560951964409 0.00775936205532
col 800 20 4.0 0.47217604082 0.000507704561018 0.00409603777811
col 900 20 4.0 0.477747050164 0.00050931863434 0.0154888042124
col 1000 20 4.0 0.481317910298 0.000393121966537 0.00273264198522
col 400 20 5.0 0.436322562497 0.000787945788973 0.00950786398483
col 500 20 5.0 0.443690678494 0.000672904173412 0.0104590921295
col 550 20 5.0 0.445626841734 0.000634913141884 0.00329756289719
col 600 20 5.0 0.450281163899 0.000714171739637 0.00895423982633
col 700 20 5.0 0.454360544615 0.000641335755608 0.0102859865647
col 800 20 5.0 0.463201045567 0.00055337522922 0.00490531493348
col 900 20 5.0 0.468145207241 0.000571227630186 0.0171706907069
col 1000 20 5.0 0.471143115315 0.000455266154427 0.00237103778742
col 400 25 0.266 0.723104111943 0.000164628389405 0.0226623455031
col 500 25 0.266 0.764845399911 0.000118890483195 0.0223378893151
col 550 25 0.266 0.781825030514 0.000103601185701 0.0167862997185
col 600 25 0.266 0.797086618726 0.000107806151668 0.0164709990799
col 700 25 0.266 0.825254856065 8.21161242394e-05 0.0208677437974
col 800 25 0.266 0.847050421717 6.48991976127e-05 0.0126672894261
col 900 25 0.266 0.866880673059 5.91270178805e-05 0.0265037483719
col 1000 25 0.266 0.881763618957 4.23309962959e-05 0.0119849681085
col 400 25 0.375 0.62949656986 0.000230805850847 0.00945700121021
col 500 25 0.375 0.672278002087 0.000169547369894 0.0120529517381
col 550 25 0.375 0.690540973693 0.000151165101735 0.00788028157856
col 600 25 0.375 0.707636813218 0.00016183413454 0.0111504769271
col 700 25 0.375 0.740290014516 0.000129078779753 0.0158729464761
col 800 25 0.375 0.76665625117 0.00010428348739 0.00948866068943
col 900 25 0.375 0.791822693847 9.54276006921e-05 0.024881767245
col 1000 25 0.375 0.811429845326 6.88151088816e-05 0.0116003722407
col 400 25 0.5 0.570339001451 0.000283958090927 0.0106760441585
col 500 25 0.5 0.606908314095 0.000211458970026 0.00831792063751
col 550 25 0.5 0.623229921535 0.000189981639472 0.00198061595361
col 600 25 0.5 0.639181609828 0.00020517275958 0.00525792552447
col 700 25 0.5 0.67003134548 0.00016768998108 0.00858496324239
col 800 25 0.5 0.696452002163 0.000141126387835 0.00402190222177
col 900 25 0.5 0.722846129073 0.000134457300354 0.0198427471746
col 1000 25 0.5 0.743891141196 9.93769506531e-05 0.0075986669659
col 400 25 0.75 0.5147932465 0.000362660890745 0.0121649063476
col 500 25 0.75 0.540301598826 0.000280182949244 0.0122206204645
col 550 25 0.75 0.551705294954 0.000253260512308 0.00592187497164
col 600 25 0.75 0.564068939343 0.000274209734513 0.0114387209373
col 700 25 0.75 0.587993807698 0.000226302932131 0.0107296801631
col 800 25 0.75 0.610082311562 0.000193475941872 0.00502406478724
col 900 25 0.75 0.633032308347 0.000188014267141 0.0160465439523
col 1000 25 0.75 0.651960550578 0.000142826280302 0.00165871191679
col 400 25 1.0 0.48987541008 0.000427121584033 0.00939008764648
col 500 25 1.0 0.508702246003 0.000334349924001 0.0111847901204
col 550 25 1.0 0.517153367028 0.000305953622072 0.00581995058984
col 600 25 1.0 0.526531442912 0.000336336418726 0.0122620400968
col 700 25 1.0 0.544633765243 0.000280844972217 0.0126249552746
col 800 25 1.0 0.562599247328 0.000239953305686 0.00806686650071
col 900 25 1.0 0.581254800026 0.000233215792435 0.0188145646192
col 1000 25 1.0 0.596888659911 0.000177314131367 0.00508360273699
col 400 25 1.5 0.466242555061 0.000521161588696 0.00659638146533
col 500 25 1.5 0.479180057448 0.000419432266225 0.00981637581149
col 550 25 1.5 0.484772869409 0.000390419767923 0.00335811856411
col 600 25 1.5 0.491324649387 0.000437872273999 0.0102933236818
col 700 25 1.5 0.503054087842 0.000372945720319 0.0111987043113
col 800 25 1.5 0.515795032212 0.000322979626049 0.00731306066531
col 900 25 1.5 0.528323858795 0.000318978280034 0.0194431921101
col 1000 25 1.5 0.538459394811 0.000244303750497 0.00687187286006
col 400 25 2.0 0.455106695921 0.000603722724984 0.00668165588314
col 500 25 2.0 0.465024923903 0.000491578683176 0.00837341083211
col 550 25 2.0 0.468799870571 0.000461975657714 0.00201956457123
col 600 25 2.0 0.474166392855 0.000511540393438 0.00826811133933
col 700 25 2.0 0.482842911699 0.000438045878448 0.00943564854075
col 800 25 2.0 0.493814413764 0.000394742288711 0.00467003003102
col 900 25 2.0 0.502791494034 0.000393097767867 0.0177732277878
col 1000 25 2.0 0.509843249639 0.000299927775739 0.00553837075265
col 400 25 2.5 0.448291224012 0.00065329546309 0.00814313506668
col 500 25 2.5 0.456801614386 0.000559120006081 0.00544711934634
col 550 25 2.5 0.459683066432 0.000523035234856 0.00145993426692
col 600 25 2.5 0.464413387537 0.000576389881591 0.00672258620221
col 700 25 2.5 0.470905848802 0.000504794031586 0.00550323044456
col 800 25 2.5 0.480080828195 0.000441470725013 0.00369819172546
col 900 25 2.5 0.48758409443 0.000442397309125 0.0160089744281
col 1000 25 2.5 0.493406554126 0.000351323516118 0.00359180539515
col 400 25 3.0 0.443840517702 0.000728446143024 0.00746947653701
col 500 25 3.0 0.450931450436 0.000596854886071 0.00659475047275
col 550 25 3.0 0.453471033116 0.00057091864315 0.00136479544876
col 600 25 3.0 0.457881552662 0.000641545626443 0.00525321717069
col 700 25 3.0 0.462987662103 0.000556547603519 0.00647289546633
col 800 25 3.0 0.471372652105 0.00049359932209 0.00263821130853
col 900 25 3.0 0.477175872704 0.000494988705245 0.0123986385662
col 1000 25 3.0 0.481780429563 0.000384110637572 0.00265809575534
col 400 25 4.0 0.437272094194 0.000816716552496 0.0089668208114
col 500 25 4.0 0.443520356694 0.000692480150973 0.00756998845539
col 550 25 4.0 0.445495007538 0.00066199561485 0.00237987066191
col 600 25 4.0 0.448431586393 0.000724861283652 0.00904716825626
col 700 25 4.0 0.452725454469 0.000643118311355 0.00611037641711
col 800 25 4.0 0.460366233111 0.000581443192655 0.00263469280122
col 900 25 4.0 0.464781653617 0.000585027329565 0.0140377478535
col 1000 25 4.0 0.467895270003 0.000455184631466 0.000667092920663
col 400 25 5.0 0.432389021331 0.000893443449653 0.0094926428542
col 500 25 5.0 0.438138801182 0.000762232480918 0.00816914149518
col 550 25 5.0 0.439818246572 0.000719564935041 0.00276664270125
col 600 25 5.0 0.443243825186 0.000809642048367 0.00746379448845
col 700 25 5.0 0.446085919627 0.000728632582827 0.00748270408684
col 800 25 5.0 0.452924295259 0.000632203594592 0.00485713095076
col 900 25 5.0 0.457177197691 0.00065473229691 0.016163192776
col 1000 25 5.0 0.459396796697 0.000520377753966 0.00224723765578
col 400 30 0.266 0.689278610231 0.000210139476358 0.0214647298998
col 500 30 0.266 0.729589872989 0.000149695345498 0.0209867606092
col 550 30 0.266 0.746583842155 0.000131120947105 0.0171126896876
col 600 30 0.266 0.762038267399 0.0001371540692 0.0156614066574
col 700 30 0.266 0.791018005391 0.00010507538872 0.0206372945426
col 800 30 0.266 0.814148447897 8.29572939617e-05 0.0154173523501
col 900 30 0.266 0.835669756107 7.56804413937e-05 0.0261055973527
col 1000 30 0.266 0.852033047233 5.43037792515e-05 0.0152770401764
col 400 30 0.375 0.59745004677 0.000293288450987 0.0064350230963
col 500 30 0.375 0.636168169689 0.000212949355641 0.0081129895705
col 550 30 0.375 0.653163807853 0.000188498439155 0.00533142157863
col 600 30 0.375 0.669250913755 0.000200518626732 0.00796147089468
col 700 30 0.375 0.700651443977 0.000159594178166 0.0124742488982
col 800 30 0.375 0.726856998168 0.000130291409946 0.00936032514547
col 900 30 0.375 0.752442584289 0.000120452222509 0.0216724384184
col 1000 30 0.375 0.77256845254 8.70666644147e-05 0.0124055148307
col 400 30 0.5 0.544889912514 0.000350973953612 0.00942435903856
col 500 30 0.5 0.576477804525 0.000261527504289 0.0081207236054
col 550 30 0.5 0.590691463821 0.000234696440823 0.00380580016157
col 600 30 0.5 0.604700907489 0.000252736478865 0.00608181841678
col 700 30 0.5 0.632704645894 0.000205053575865 0.00535230172035
col 800 30 0.5 0.657224635241 0.000171112999761 0.00188873956899
col 900 30 0.5 0.682102331653 0.000162913090664 0.0149033727703
col 1000 30 0.5 0.702320400725 0.000121481186507 0.00634288133996
col 400 30 0.75 0.497998030925 0.000432510099679 0.00923533410502
col 500 30 0.75 0.519212217715 0.000335376800338 0.00908776487914
col 550 30 0.75 0.529013452676 0.000303315883868 0.00685884912954
col 600 30 0.75 0.539018641837 0.000329018000218 0.010535767358
col 700 30 0.75 0.559490179902 0.000272570705729 0.0101729139668
col 800 30 0.75 0.57862718533 0.000232939407048 0.00604796122475
col 900 30 0.75 0.598620540748 0.000225954695852 0.0159643923731
col 1000 30 0.75 0.615338699108 0.000171226809585 0.00526369816244
col 400 30 1.0 0.477361515417 0.000501392726926 0.00809432865659
col 500 30 1.0 0.49286020857 0.000391913905678 0.00749092774919
col 550 30 1.0 0.500022748805 0.000359650879031 0.00489840977846
col 600 30 1.0 0.507594591519 0.000396566257097 0.00994392422632
col 700 30 1.0 0.522806022275 0.000331874167472 0.0103100465051
col 800 30 1.0 0.537636458447 0.000284121207437 0.00674178349212
col 900 30 1.0 0.553477127814 0.000277205935193 0.0160492010493
col 1000 30 1.0 0.566931781423 0.000211372895422 0.00711584191121
col 400 30 1.5 0.457833038297 0.00060088606311 0.00652013938377
col 500 30 1.5 0.468547905773 0.000481379307013 0.00808589278517
col 550 30 1.5 0.473118462087 0.000449956765263 0.00271146371992
col 600 30 1.5 0.478507958807 0.000505777154794 0.00790435093552
col 700 30 1.5 0.487958751739 0.000431335686277 0.00780157830911
col 800 30 1.5 0.498262178762 0.00037352231353 0.0050534920654
col 900 30 1.5 0.508924448027 0.000371504060298 0.0161183423019
col 1000 30 1.5 0.517187638655 0.000285423358411 0.00620780998775
col 400 30 2.0 0.448876770538 0.000685410345239 0.00687056800805
col 500 30 2.0 0.457008172785 0.000558418026214 0.00737759841292
col 550 30 2.0 0.460198487622 0.000526043001233 0.0022021489338
col 600 30 2.0 0.464415869504 0.000580256901866 0.00568752113866
col 700 30 2.0 0.471607154652 0.000499348230572 0.00697765659461
col 800 30 2.0 0.480006244909 0.000452384129533 0.00298818659703
col 900 30 2.0 0.487575158688 0.000451784229758 0.0133708343834
col 1000 30 2.0 0.493274353503 0.000344376128251 0.00463796173731
col 400 30 2.5 0.442893981138 0.000741901987019 0.00588175053941
col 500 30 2.5 0.449678552662 0.000628953853573 0.00443596303646
col 550 30 2.5 0.452237053387 0.000586962020299 0.000925136407718
col 600 30 2.5 0.455949968345 0.000649577844125 0.00498621053337
col 700 30 2.5 0.461212624726 0.000571794294916 0.00449773178017
col 800 30 2.5 0.468422514412 0.000498781045079 0.00220123158018
col 900 30 2.5 0.475033062262 0.000503491025618 0.0120616375614
col 1000 30 2.5 0.479614810516 0.000401551665185 0.00292187005412
col 400 30 3.0 0.438508203937 0.000821228761275 0.00509974743652
col 500 30 3.0 0.444865028511 0.000672176755873 0.00583542473864
col 550 30 3.0 0.447150200766 0.000640381605804 0.00044534983172
col 600 30 3.0 0.450336933414 0.000717638884336 0.00416239409475
col 700 30 3.0 0.454966327042 0.000623104667678 0.00471792784924
col 800 30 3.0 0.461412684017 0.000557351497603 0.000652485004298
col 900 30 3.0 0.466215374334 0.000557785189879 0.0113972880743
col 1000 30 3.0 0.470238859088 0.000433272418053 0.00210956406685
col 400 30 4.0 0.433033112867 0.000917117018316 0.00893034559421
col 500 30 4.0 0.438752365082 0.000771754717799 0.00671127761866
col 550 30 4.0 0.440315705607 0.000735153643162 0.00250845715064
col 600 30 4.0 0.442594338903 0.000808167591225 0.00402068746586
col 700 30 4.0 0.446146036907 0.000717124283339 0.00541947628444
col 800 30 4.0 0.451703453206 0.000647224140643 0.0013949762074
col 900 30 4.0 0.455496939355 0.000651985075191 0.0128941819231
col 1000 30 4.0 0.458386453404 0.000509987621959 0.00217618858762
col 400 30 5.0 0.428806303993 0.000999515232739 0.00774504769889
col 500 30 5.0 0.434123817014 0.000845730246341 0.00791510337189
col 550 30 5.0 0.43554569509 0.000798924239429 0.00382432105067
col 600 30 5.0 0.437842232859 0.000897966610549 0.00552961995758
col 700 30 5.0 0.440889689994 0.000803982492577 0.00755232915242
col 800 30 5.0 0.445540283892 0.000702957743154 0.00506574239063
col 900 30 5.0 0.4490031482 0.000728181955006 0.0139690951287
col 1000 30 5.0 0.451083440857 0.000577257814155 0.00434811232599
col 400 40 0.266 0.63556626743 0.000326107768957 0.0179272467387
col 500 40 0.266 0.672733179869 0.000222681380131 0.019146630532
col 550 40 0.266 0.688766998457 0.000192773109816 0.0166921375556
col 600 40 0.266 0.703963255377 0.000200735977187 0.0149756563407
col 700 40 0.266 0.732632918889 0.000155654935101 0.0196925326473
col 800 40 0.266 0.756894002308 0.000123939384917 0.0175929023689
col 900 40 0.266 0.779647057835 0.000113443616211 0.0238909925437
col 1000 40 0.266 0.797875084097 8.14300003139e-05 0.0194734127377
col 400 40 0.375 0.549802987867 0.000444608685601 0.00647469945503
col 500 40 0.375 0.581544100407 0.000317167040048 0.00415235751281
col 550 40 0.375 0.596037592651 0.000278109563429 0.00152915967898
col 600 40 0.375 0.609954570084 0.000292454289614 0.00338134602946
col 700 40 0.375 0.637924144283 0.000229129042945 0.00674462737682
col 800 40 0.375 0.662474291858 0.000185236946138 0.00641226403695
col 900 40 0.375 0.686766274361 0.000172605710796 0.014312246354
col 1000 40 0.375 0.706909874469 0.0001262121294 0.0117333356819
col 400 40 0.5 0.508507319523 0.000505898688466 0.00714313204619
col 500 40 0.5 0.532290030412 0.000375503439425 0.00743119564035
col 550 40 0.5 0.543405500548 0.000336248552793 0.00447435828622
col 600 40 0.5 0.554219866783 0.000361265075561 0.00731493460503
col 700 40 0.5 0.576852038769 0.000291574285062 0.00648113041898
col 800 40 0.5 0.597334573426 0.000240662075437 0.00365901692993
col 900 40 0.5 0.618780728235 0.000226962871738 0.00874766941842
col 1000 40 0.5 0.636792667826 0.000167955327734 0.00403406311231
col 400 40 0.75 0.474041117897 0.000588907264189 0.00536195225283
col 500 40 0.75 0.489619368093 0.000453326386388 0.00562772601321
col 550 40 0.75 0.496847739466 0.000409740940715 0.00462176700995
col 600 40 0.75 0.504210925088 0.000444717620818 0.00789720690653
col 700 40 0.75 0.519395845686 0.000371099035006 0.00688205750398
col 800 40 0.75 0.533720847875 0.000318369419965 0.00590030666701
col 900 40 0.75 0.548954379339 0.000309807947878 0.0122627529134
col 1000 40 0.75 0.561949208761 0.000234928026044 0.00895332662709
col 400 40 1.0 0.459183235586 0.000662094845812 0.00491004376394
col 500 40 1.0 0.470601410055 0.000512149846987 0.00521154417373
col 550 40 1.0 0.476041091062 0.000470761577048 0.00328812675107
col 600 40 1.0 0.481375111347 0.000519195510829 0.00679439901876
col 700 40 1.0 0.492356047374 0.000435724777655 0.00620245441489
col 800 40 1.0 0.50320660358 0.000374463331888 0.00523812002851
col 900 40 1.0 0.514880809279 0.00036846421968 0.0127077255672
col 1000 40 1.0 0.524731930061 0.000283352232261 0.00880552696051
col 400 40 1.5 0.445266581514 0.000774196562823 0.00496636905817
col 500 40 1.5 0.452975737779 0.000610846724154 0.00324114878971
col 550 40 1.5 0.456705531643 0.000569981687082 0.00217489160546
col 600 40 1.5 0.460298261236 0.000637760767396 0.00505333886861
col 700 40 1.5 0.467250470424 0.000543631531263 0.0052820466277
col 800 40 1.5 0.474564799798 0.000472078680152 0.00301079898842
col 900 40 1.5 0.481902805322 0.000473882260332 0.00911605894622
col 1000 40 1.5 0.488081475272 0.000365582696111 0.0053563424342
col 400 40 2.0 0.438497366694 0.000870189315554 0.00491587070921
col 500 40 2.0 0.444607645194 0.000698442362801 0.00458607315128
col 550 40 2.0 0.447061016424 0.000654903151284 0.000394353925915
col 600 40 2.0 0.449780900636 0.00071919820665 0.00411335913568
col 700 40 2.0 0.455441876375 0.000619543814081 0.00508489149497
col 800 40 2.0 0.460880369869 0.000559862809075 0.00159061325704
col 900 40 2.0 0.466630502586 0.000560766037777 0.00873576036562
col 1000 40 2.0 0.470719988965 0.000428634451806 0.00470052851134
col 400 40 2.5 0.433847234226 0.000941705012698 0.00327200221057
col 500 40 2.5 0.439479924727 0.000774340779249 0.00444823252873
col 550 40 2.5 0.441483365283 0.000719175131703 0.000408140954605
col 600 40 2.5 0.443315401523 0.000798480461516 0.005356087925
col 700 40 2.5 0.447798723159 0.000700425178327 0.00182995172196
col 800 40 2.5 0.45268638133 0.00060885699245 0.00250372568235
col 900 40 2.5 0.457213581236 0.000619339027727 0.00777670933766
col 1000 40 2.5 0.460950033104 0.000492976173191 0.0043729919993
col 400 40 3.0 0.431158536183 0.00102526779945 0.00414298047684
col 500 40 3.0 0.435951779653 0.000828602851401 0.00463534151086
col 550 40 3.0 0.437604368098 0.000780651125872 0.00195145941834
col 600 40 3.0 0.439580598457 0.000870105069024 0.0027394889556
col 700 40 3.0 0.44323300085 0.000754377887928 0.00500858830059
col 800 40 3.0 0.447261870132 0.000676838268708 0.00066643317923
col 900 40 3.0 0.450945608264 0.00067603127252 0.00706316726598
col 1000 40 3.0 0.453523245689 0.000527655822011 0.0036361604692
col 400 40 4.0 0.426158193183 0.00113993308536 0.00645084973137
col 500 40 4.0 0.430734317296 0.000938152317935 0.00515545258324
col 550 40 4.0 0.432059491898 0.000884478449889 0.00232827811273
col 600 40 4.0 0.433737370685 0.000973101784223 0.0019656706816
col 700 40 4.0 0.436616831081 0.000860699231115 0.00447765648941
col 800 40 4.0 0.439925234947 0.000771745587724 0.00224285625633
col 900 40 4.0 0.44288674291 0.000778929568583 0.00864129656715
col 1000 40 4.0 0.44489490912 0.000612934918461 0.0039452728869
col 400 40 5.0 0.423231134637 0.00122839659505 0.00737471840156
col 500 40 5.0 0.427489137598 0.00101906722523 0.00691684835246
col 550 40 5.0 0.428171416233 0.000960238266442 0.00459056975898
col 600 40 5.0 0.429872992265 0.00107257254151 0.00538758589441
col 700 40 5.0 0.431746865369 0.000953260804518 0.00533851856233
col 800 40 5.0 0.43511960426 0.000838526821487 0.00372088638774
col 900 40 5.0 0.437492622727 0.000864675374434 0.0100918990106
col 1000 40 5.0 0.439351713682 0.000683079132796 0.0068012656513
col 400 50 0.266 0.596228545398 0.000478150002891 0.0155445724371
col 500 50 0.266 0.629990499415 0.000316483838273 0.0170665348134
col 550 50 0.266 0.645047611512 0.000270213535309 0.0162216695718
col 600 50 0.266 0.659277427128 0.000278208112769 0.0141414715242
col 700 50 0.266 0.686737550736 0.000212771016642 0.0183600507337
col 800 50 0.266 0.710751000483 0.000169278742768 0.0175232786356
col 900 50 0.266 0.733075646632 0.000156479570184 0.0214480112047
col 1000 50 0.266 0.752012793081 0.000112863959781 0.0211880049474
col 400 50 0.375 0.516821712103 0.000630252664404 0.00415908801559
col 500 50 0.375 0.543560702039 0.000442514453274 0.00442994593211
col 550 50 0.375 0.555796103112 0.00038582922207 0.00271692325965
col 600 50 0.375 0.567842977894 0.000403087241277 0.00305402229488
col 700 50 0.375 0.592294796894 0.000312556652843 0.00200892429292
col 800 50 0.375 0.614627420717 0.000249953526349 0.00263044275656
col 900 50 0.375 0.636692908302 0.000231380016596 0.00813601048293
col 1000 50 0.375 0.655770705234 0.000168329622861 0.00916903102602
col 400 50 0.5 0.483789013551 0.000692228470033 0.00392512015073
col 500 50 0.5 0.502863437208 0.000504734581609 0.00549812614288
col 550 50 0.5 0.511977004976 0.000450250778348 0.00453111619668
col 600 50 0.5 0.520629163596 0.000481993769236 0.00753163199695
col 700 50 0.5 0.539112520867 0.000388525239941 0.0064869486696
col 800 50 0.5 0.556099872943 0.000319822232927 0.00485066125607
col 900 50 0.5 0.573934064682 0.00030090739092 0.00814388980723
col 1000 50 0.5 0.589694336332 0.000221280171563 0.0066841867904
col 400 50 0.75 0.458086602394 0.00077374894958 0.00426979526293
col 500 50 0.75 0.47013555084 0.000583627980189 0.00383075597734
col 550 50 0.75 0.475670265238 0.000525112731766 0.00367311800302
col 600 50 0.75 0.481715342307 0.0005679813858 0.00609054600821
col 700 50 0.75 0.493324851237 0.000473703266811 0.00397998116409
col 800 50 0.75 0.504666754285 0.000406719614611 0.00538644860424
col 900 50 0.75 0.516388036794 0.0003977495523 0.00823294885606
col 1000 50 0.75 0.526805911696 0.000302322675997 0.00903447009966
col 400 50 1.0 0.446702671309 0.000847912501035 0.00361766933826
col 500 50 1.0 0.455660386801 0.000644263358791 0.00615616974444
col 550 50 1.0 0.460274229563 0.000588360528591 0.00319397485554
col 600 50 1.0 0.464170433141 0.000646123237041 0.00476982816528
col 700 50 1.0 0.472493832904 0.000541915867425 0.00367255511196
col 800 50 1.0 0.48082967159 0.000466184788366 0.00456710563564
col 900 50 1.0 0.48972900645 0.000460569622455 0.00702406807462
col 1000 50 1.0 0.497453136585 0.000355389966469 0.00647982883496
col 400 50 1.5 0.43550049535 0.000978434422841 0.00328332583491
col 500 50 1.5 0.441792139767 0.000755258143725 0.00313135280699
col 550 50 1.5 0.445276532688 0.000697128573953 0.00442371244235
col 600 50 1.5 0.447941527931 0.00077296821758 0.00298741629116
col 700 50 1.5 0.453248586088 0.000656438878308 0.00182066864964
col 800 50 1.5 0.458814542274 0.000570365080407 0.0025027463002
col 900 50 1.5 0.464566382875 0.000573713116014 0.0061577266336
col 1000 50 1.5 0.469389850145 0.000443259373896 0.00426408442031
col 400 50 2.0 0.430104804143 0.00108997498659 0.00624662228253
col 500 50 2.0 0.435146996162 0.000853476154958 0.00316731890315
col 550 50 2.0 0.437274580879 0.000792239846763 0.00251232817246
col 600 50 2.0 0.439399163406 0.000864976244906 0.00333796653593
col 700 50 2.0 0.444079689269 0.000742567836942 0.00207273122134
col 800 50 2.0 0.44850508317 0.000663141588259 0.00106677496597
col 900 50 2.0 0.452424922365 0.000665381614813 0.00682017804502
col 1000 50 2.0 0.456040670672 0.000509949314914 0.00381649478537
col 400 50 2.5 0.426161368269 0.00118098512607 0.00213021047657
col 500 50 2.5 0.431330691815 0.00093611496041 0.00223470341864
col 550 50 2.5 0.433062259875 0.000861600102021 0.000714504855059
col 600 50 2.5 0.435143127046 0.000950922136533 0.004826534678
col 700 50 2.5 0.438130609053 0.000830266958232 0.00322010731244
col 800 50 2.5 0.441740995347 0.000719821191321 0.000833784285553
col 900 50 2.5 0.445359132567 0.000731820976959 0.00536905178421
col 1000 50 2.5 0.447930126564 0.000579718289203 0.00254888361278
col 400 50 3.0 0.424133449849 0.00126339164459 0.00546940608314
col 500 50 3.0 0.428646874393 0.0010008752814 0.00338640595942
col 550 50 3.0 0.429763394684 0.000931861743238 0.00320123929896
col 600 50 3.0 0.431068070671 0.00103195232551 0.00109041300562
col 700 50 3.0 0.434656691218 0.000888870485313 0.00230711890086
col 800 50 3.0 0.43772211655 0.000793331607026 0.000670584064268
col 900 50 3.0 0.440323754048 0.000792902576294 0.0078107748939
col 1000 50 3.0 0.442498636795 0.000618939342079 0.00404456634662
col 400 50 4.0 0.420432151967 0.00139342097318 0.00532469857372
col 500 50 4.0 0.424495588684 0.00112023008051 0.00548732378721
col 550 50 4.0 0.42544015967 0.00104343560467 0.00408804870253
col 600 50 4.0 0.426641138442 0.00115043725547 0.00793621574386
col 700 50 4.0 0.429185665054 0.00100588564266 0.00336924660032
col 800 50 4.0 0.431647558658 0.00089355660076 0.00205312814653
col 900 50 4.0 0.433922781459 0.000903197462024 0.00519216029821
col 1000 50 4.0 0.435741875482 0.0007108637583 0.00531152183582
col 400 50 5.0 0.417215007427 0.00149490705032 0.0053847048991
col 500 50 5.0 0.420642188893 0.00121473878323 0.00550590388406
col 550 50 5.0 0.421920640376 0.00113013452417 0.00417445160066
col 600 50 5.0 0.423202966572 0.00125471540127 0.00809381184773
col 700 50 5.0 0.425411603448 0.00109875454901 0.0042137549592
col 800 50 5.0 0.427437474849 0.000972252402928 0.00270365731068
col 900 50 5.0 0.429554988727 0.000995002649233 0.00698509702652
col 1000 50 5.0 0.43052438671 0.000785481694881 0.00607465678628
col 400 60 0.266 0.566671716168 0.000667447697194 0.0142944460318
col 500 60 0.266 0.597731908827 0.00043318251924 0.015492691786
col 550 60 0.266 0.611781550053 0.000366536121624 0.0154713395492
col 600 60 0.266 0.625006315421 0.000374474589258 0.0145792035233
col 700 60 0.266 0.650842471957 0.000281659609098 0.0166431615587
col 800 60 0.266 0.673671749785 0.000221886031369 0.0162023697581
col 900 60 0.266 0.695289863047 0.0002039036729 0.0194226970343
col 1000 60 0.266 0.714151423138 0.000146973288701 0.021651087603
col 400 60 0.375 0.494067152321 0.000845200165381 0.00373595934354
col 500 60 0.375 0.516541014994 0.000586144692434 0.00401665283633
col 550 60 0.375 0.527113934542 0.000508693265305 0.00257909198918
col 600 60 0.375 0.53788576683 0.000529332290581 0.0039549966692
col 700 60 0.375 0.558983256649 0.000409137469711 0.00157339359903
col 800 60 0.375 0.578944981812 0.000325361293516 0.00101034030098
col 900 60 0.375 0.598747436262 0.000299836983051 0.00334755453848
col 1000 60 0.375 0.616763319566 0.000216530548823 0.00667340558599
col 400 60 0.5 0.467190623167 0.000907098298367 0.00278549355442
col 500 60 0.5 0.482990282439 0.000648139109994 0.00459775428481
col 550 60 0.5 0.49050228571 0.000574109136197 0.00625211291101
col 600 60 0.5 0.497773450859 0.000611699748024 0.0064365254657
col 700 60 0.5 0.512768802641 0.000492154904394 0.00590393039347
col 800 60 0.5 0.527331857336 0.000405101864937 0.00662189092239
col 900 60 0.5 0.542236962742 0.000381767806924 0.00620918334359
col 1000 60 0.5 0.556088943103 0.000280183028559 0.00827934197163
col 400 60 0.75 0.446012562311 0.000991291727272 0.00260048540733
col 500 60 0.75 0.456008890462 0.000727429943314 0.00310092947713
col 550 60 0.75 0.461234214455 0.000649132412012 0.00256817721673
col 600 60 0.75 0.465873370123 0.000699108502865 0.00488577833681
col 700 60 0.75 0.475558850461 0.000579253188753 0.00401627901121
col 800 60 0.75 0.484790188912 0.000495173195996 0.00582993740023
col 900 60 0.75 0.4942790855 0.000484688295279 0.0042019523305
col 1000 60 0.75 0.502846753323 0.000369101736825 0.00912153691206
col 400 60 1.0 0.436617368356 0.00106693056847 0.00265364060626
col 500 60 1.0 0.444579604603 0.000789974350092 0.000741654992594
col 550 60 1.0 0.448084785037 0.00071636906489 0.00217696788274
col 600 60 1.0 0.451512585123 0.00078001032158 0.00506731073576
col 700 60 1.0 0.458839045967 0.000650073447275 0.00279679640839
col 800 60 1.0 0.46584936469 0.000556949705885 0.00374128323164
col 900 60 1.0 0.472795234355 0.000550533560114 0.00288216681425
col 1000 60 1.0 0.479390707014 0.000424544651514 0.00724692120957
col 400 60 1.5 0.427684696623 0.00121075480394 0.0010433234565
col 500 60 1.5 0.433594191541 0.000912775714125 0.00103408865476
col 550 60 1.5 0.436366354118 0.000833885945308 0.0026029798495
col 600 60 1.5 0.438581825992 0.000916093859349 0.00318747437758
col 700 60 1.5 0.443463365649 0.00077099766706 0.00127779036071
col 800 60 1.5 0.448037713251 0.000667689528999 0.00247182246308
col 900 60 1.5 0.452196410858 0.000670437981902 0.00342076271131
col 1000 60 1.5 0.456668621763 0.000517280080515 0.00420812699018
col 400 60 2.0 0.42354188165 0.00133879287558 0.00289771359262
col 500 60 2.0 0.427978947648 0.00102317569898 0.00104246102856
col 550 60 2.0 0.42992776681 0.000938522277257 0.00160475040854
col 600 60 2.0 0.432261589437 0.00101790392853 0.00126597736584
col 700 60 2.0 0.435877376387 0.000867795206964 0.000926982844613
col 800 60 2.0 0.439203282679 0.000765732221091 0.00448673412379
col 900 60 2.0 0.4424880945 0.000766698400675 0.00117637732951
col 1000 60 2.0 0.445864960916 0.000588329838113 0.00431933003444
col 400 60 2.5 0.420173719218 0.00145467315494 0.00204138511132
col 500 60 2.5 0.424730595185 0.0011144129941 0.00197196978968
col 550 60 2.5 0.426431564565 0.00101769705586 0.00221714971294
col 600 60 2.5 0.427866045892 0.00111650026359 0.00366187392057
col 700 60 2.5 0.431280283184 0.000959109627632 0.00231978013995
col 800 60 2.5 0.433972462421 0.000830451874968 0.000943958018998
col 900 60 2.5 0.436669981441 0.000841884571366 0.00209464464299
col 1000 60 2.5 0.439210405366 0.000661487311694 0.00384809307335
col 400 60 3.0 0.418332983337 0.00154915840305 0.00358862577356
col 500 60 3.0 0.421970548168 0.00119305115613 0.00205984439749
col 550 60 3.0 0.42395863724 0.00109464047954 0.00215013102103
col 600 60 3.0 0.424752707559 0.00120204704668 0.00647052637512
col 700 60 3.0 0.428040538561 0.00102614460734 0.00269335245246
col 800 60 3.0 0.43022708049 0.000908589186591 0.00193331626046
col 900 60 3.0 0.432802442881 0.000907088695522 0.00237442133494
col 1000 60 3.0 0.434459072329 0.000707543033227 0.00321220956388
col 400 60 4.0 0.414668862932 0.00170291037151 0.00679051989124
col 500 60 4.0 0.418560560443 0.00132157376556 0.00273273516405
col 550 60 4.0 0.420219668727 0.00121227935574 0.0035664507234
col 600 60 4.0 0.421181706507 0.00133320227497 0.00122008132557
col 700 60 4.0 0.423439480892 0.00115234897465 0.00497380497131
col 800 60 4.0 0.424940431822 0.00101789807602 0.00154034175235
col 900 60 4.0 0.426921383285 0.00102648409676 0.00353365844921
col 1000 60 4.0 0.428632705132 0.000805173310032 0.00549350413206
col 400 60 5.0 0.411725633312 0.00182503143986 0.00394966649465
col 500 60 5.0 0.415626138779 0.00142578028793 0.00407930165688
col 550 60 5.0 0.417129824799 0.00130540409722 0.00440562078783
col 600 60 5.0 0.418626515521 0.00143867951731 0.00347151642691
col 700 60 5.0 0.420692419271 0.00124638109529 0.00501824521566
col 800 60 5.0 0.421931058913 0.0011005266187 0.00277151681016
col 900 60 5.0 0.423175902014 0.0011233081018 0.00482242965056
col 1000 60 5.0 0.424502230935 0.000881374192134 0.0066433106056
col 400 70 0.266 0.543155101959 0.000893681477518 0.0120863232347
col 500 70 0.266 0.572225804695 0.000573742123303 0.0135022442905
col 550 70 0.266 0.585652438087 0.00048239640729 0.0147589512099
col 600 70 0.266 0.598309740952 0.00048917608559 0.0140124130493
col 700 70 0.266 0.622394421039 0.000364337768245 0.0150087635114
col 800 70 0.266 0.644139160993 0.000283722320408 0.0152495890637
col 900 70 0.266 0.664433197709 0.00025864343305 0.0176536039397
col 1000 70 0.266 0.682894031473 0.00018526033264 0.0211205190525
col 400 70 0.375 0.476403281218 0.00109478744643 0.00318846861288
col 500 70 0.375 0.49676144534 0.000746242601831 0.00383716652816
col 550 70 0.375 0.506239995176 0.000645658696567 0.00312358693564
col 600 70 0.375 0.515388004952 0.000670598819543 0.00441969065919
col 700 70 0.375 0.534088189988 0.000516508127303 0.00381433607168
col 800 70 0.375 0.552147195265 0.000410102635509 0.00317086022291
col 900 70 0.375 0.569709259853 0.000377237248913 0.00016631468399
col 1000 70 0.375 0.586135024768 0.000271359412309 0.0038939447774
col 400 70 0.5 0.45355048141 0.00115748137469 0.00513016764861
col 500 70 0.5 0.467912338818 0.00080781174642 0.00453586202002
col 550 70 0.5 0.474571139809 0.000709922505035 0.00344965475415
col 600 70 0.5 0.480885743246 0.000752235966831 0.00583506998269
col 700 70 0.5 0.494030642248 0.000601016943906 0.0059201768789
col 800 70 0.5 0.506506077429 0.000493643629017 0.0071784940224
col 900 70 0.5 0.519342152677 0.000466492422089 0.00586971156336
col 1000 70 0.5 0.531389458415 0.00034285912278 0.00794997585114
col 400 70 0.75 0.436256034748 0.00124090217287 0.00124728674084
col 500 70 0.75 0.446004023084 0.000886222584661 0.00197186505606
col 550 70 0.75 0.450206436467 0.000786048603408 0.00285506877075
col 600 70 0.75 0.454563441452 0.000839177067504 0.00331246706703
col 700 70 0.75 0.462557706684 0.000687619494585 0.00464057245455
col 800 70 0.75 0.470443559423 0.000584112514024 0.00561829203665
col 900 70 0.75 0.478574412818 0.000570835975979 0.00436919440827
col 1000 70 0.75 0.485960135557 0.000434073612591 0.00690688948338
col 400 70 1.0 0.428364542976 0.00131916822939 0.00177285882486
col 500 70 1.0 0.436118110508 0.00095347848973 0.000996491750868
col 550 70 1.0 0.439529809719 0.000853784055981 0.00334817969781
col 600 70 1.0 0.442605974229 0.000920938347484 0.00289444357858
col 700 70 1.0 0.44887349411 0.000760554176997 0.00327174257359
col 800 70 1.0 0.454537004485 0.000648837874566 0.00451133754697
col 900 70 1.0 0.46062106922 0.00063905548297 0.00299289423174
col 1000 70 1.0 0.466127998353 0.000491444462956 0.00647773124435
col 400 70 1.5 0.421311329165 0.00146904778953 0.00338226309739
col 500 70 1.5 0.426734452482 0.00108698063595 0.000217936363895
col 550 70 1.5 0.429160272468 0.000982662381357 0.000283386636341
col 600 70 1.5 0.431302860114 0.00106800853054 0.00253836620186
col 700 70 1.5 0.435780318979 0.000890295436644 0.0021361608214
col 800 70 1.5 0.439459771863 0.000767939230905 0.00340438841579
col 900 70 1.5 0.443876142434 0.000764296874545 0.00188808118066
col 1000 70 1.5 0.447167161005 0.000588863738633 0.003824502023
col 400 70 2.0 0.417174856374 0.00162877538316 0.00391066962098
col 500 70 2.0 0.421765118476 0.00121255546264 0.0012167741014
col 550 70 2.0 0.424126878985 0.00109769232519 0.00447677979771
col 600 70 2.0 0.425667897486 0.00118596187998 0.00186611910571
col 700 70 2.0 0.429313930302 0.000998810302309 0.002291654213
col 800 70 2.0 0.432546173352 0.000869683018994 0.00191957815983
col 900 70 2.0 0.435079032317 0.000867436112802 0.00107098142798
col 1000 70 2.0 0.43804570148 0.000665557725847 0.00356042802369
col 400 70 2.5 0.414388641559 0.00176567409056 0.00187955827241
col 500 70 2.5 0.418791656115 0.0013202225826 0.000807174323887
col 550 70 2.5 0.42072045755 0.0011902516268 0.00123005908267
col 600 70 2.5 0.422221904024 0.00129275378103 0.00188697248098
col 700 70 2.5 0.425162959235 0.00109539717384 0.000868940910162
col 800 70 2.5 0.427766957846 0.000944535232876 0.001849980525
col 900 70 2.5 0.430193163011 0.000949705062889 0.000805790501585
col 1000 70 2.5 0.43252515661 0.000740816231314 0.00368043064183
col 400 70 3.0 0.411889751492 0.00187354359129 0.00391918208174
col 500 70 3.0 0.417000276059 0.00140113551344 0.0018907601384
col 550 70 3.0 0.418753726116 0.00126786680169 0.00211975209172
col 600 70 3.0 0.420034989804 0.00138389695576 0.00137654797974
col 700 70 3.0 0.422114089355 0.00117387113146 0.000844598960079
col 800 70 3.0 0.42446282503 0.00102574376476 0.00219151677206
col 900 70 3.0 0.426202469684 0.00102309919465 0.00106294310509
col 1000 70 3.0 0.428539925375 0.000793120492703 0.00343159073642
col 400 70 4.0 0.40957110173 0.00204051202796 0.00955227294639
col 500 70 4.0 0.413352871756 0.0015456353187 0.00149939941243
col 550 70 4.0 0.414885473217 0.00140408637409 0.00381239248523
col 600 70 4.0 0.416067044254 0.00153609784764 0.00462991209696
col 700 70 4.0 0.418376289099 0.00130561329511 0.00171269020282
col 800 70 4.0 0.41989702707 0.00114616150128 0.00135482695486
col 900 70 4.0 0.42194264185 0.00114783480971 0.00245131570292
col 1000 70 4.0 0.423230094391 0.000896615260329 0.00497381392585
col 400 70 5.0 0.406138605361 0.00218882624113 0.00239272789507
col 500 70 5.0 0.41125411193 0.00164574566617 0.00395052824289
col 550 70 5.0 0.412815542264 0.00149861529014 0.00505347652019
col 600 70 5.0 0.413791873622 0.00164921545091 0.00402240065995
col 700 70 5.0 0.415558882891 0.00140802914622 0.00374680993523
col 800 70 5.0 0.417051852025 0.00122947405324 0.00366002899185
col 900 70 5.0 0.418829227456 0.00124358439218 0.00496674363398
col 1000 70 5.0 0.419700028273 0.000977800873728 0.00719931335986
col 400 80 0.266 0.525255679163 0.00114811209098 0.0133867041112
col 500 80 0.266 0.552227022995 0.000734047832238 0.0128548930026
col 550 80 0.266 0.564783551991 0.000616134028973 0.0141874946423
col 600 80 0.266 0.576619338338 0.000623231955217 0.0138922321599
col 700 80 0.266 0.599019457523 0.000460962405066 0.0148396013968
col 800 80 0.266 0.619649212118 0.000356413662831 0.0153375287773
col 900 80 0.266 0.639094410792 0.000322220474486 0.0164728112407
col 1000 80 0.266 0.656907402187 0.000228869293686 0.0204864012376
col 400 80 0.375 0.463069153572 0.00137111601591 0.00409501260466
col 500 80 0.375 0.481343214864 0.000923923316517 0.00382673787245
col 550 80 0.375 0.489641406947 0.000796964443091 0.00385170593026
col 600 80 0.375 0.498162597316 0.00082557685312 0.00407974077596
col 700 80 0.375 0.514997105322 0.00063484809206 0.00505311932877
col 800 80 0.375 0.531317506517 0.000503026262969 0.00398764875276
col 900 80 0.375 0.547124804774 0.000462416811088 0.00228219972176
col 1000 80 0.375 0.562283665411 0.00033180781044 0.00394660329382
col 400 80 0.5 0.44319637093 0.00143857935787 0.00395392266025
col 500 80 0.5 0.456169821456 0.000986761669172 0.00348104776688
col 550 80 0.5 0.462820990028 0.00085853843665 0.00384489716113
col 600 80 0.5 0.468088417436 0.000903967310337 0.00464098338519
col 700 80 0.5 0.479531597631 0.000717618515052 0.0069063914539
col 800 80 0.5 0.490761059033 0.000587203109335 0.00705638720389
col 900 80 0.5 0.501978316953 0.000555166689659 0.0064515097158
col 1000 80 0.5 0.512640243486 0.000408155997827 0.00777841274064
col 400 80 0.75 0.427758956608 0.00152791414765 0.00240081036963
col 500 80 0.75 0.437339114214 0.00106809372652 0.00113751750637
col 550 80 0.75 0.44142201173 0.000936314203462 0.00291193274436
col 600 80 0.75 0.445235595427 0.000992345747003 0.00341664260102
col 700 80 0.75 0.452769831515 0.000804088057 0.00478203422693
col 800 80 0.75 0.459667884131 0.000676326981013 0.00539332149228
col 900 80 0.75 0.466532562127 0.000657865639481 0.00504972418335
col 1000 80 0.75 0.473262903378 0.000498050424119 0.00607488409357
col 400 80 1.0 0.42101038442 0.00161075689324 0.00231297082408
col 500 80 1.0 0.429319644388 0.00113588757117 0.000222219408291
col 550 80 1.0 0.432252939262 0.00100873620917 0.00136484101934
col 600 80 1.0 0.435143174772 0.00107625630268 0.00195735703473
col 700 80 1.0 0.440867291601 0.0008794669479 0.00348285500575
col 800 80 1.0 0.446039043471 0.000744031781911 0.00468550857223
col 900 80 1.0 0.451259346409 0.000728715587605 0.00333056112521
col 1000 80 1.0 0.456272869156 0.000557528377598 0.00658861796365
col 400 80 1.5 0.415787827044 0.00176371473054 0.00573090125188
col 500 80 1.5 0.420764867519 0.0012814934505 0.000635521117752
col 550 80 1.5 0.423351820492 0.00114345221858 0.00397509291728
col 600 80 1.5 0.425809183649 0.00123238611076 0.00283150625099
col 700 80 1.5 0.429364928606 0.00101894662441 0.00318214148718
col 800 80 1.5 0.433276420249 0.000869767114477 0.00241957381112
col 900 80 1.5 0.436937177533 0.000860853944137 0.00113003645285
col 1000 80 1.5 0.440086319134 0.000659927066771 0.00608648886309
col 400 80 2.0 0.411133456799 0.00194866403284 0.00458420742689
col 500 80 2.0 0.416927286457 0.00141891875251 0.00138183838433
col 550 80 2.0 0.419195801183 0.00127166435178 0.00455672641159
col 600 80 2.0 0.420869178791 0.00137060723258 0.000591335792167
col 700 80 2.0 0.424044578199 0.0011368141708 0.00160892027067
col 800 80 2.0 0.426452570921 0.000981011958654 0.00305091118812
col 900 80 2.0 0.429662472653 0.000970531409654 0.000542821494178
col 1000 80 2.0 0.431723983035 0.00074365111108 0.00582372216719
col 400 80 2.5 0.408647165974 0.00210899279877 0.00124360030045
col 500 80 2.5 0.414089161236 0.00153754081854 0.00407793233236
col 550 80 2.5 0.415670049096 0.00138006258297 0.00142166049993
col 600 80 2.5 0.41794309404 0.00148648023599 0.00441458642424
col 700 80 2.5 0.420007584435 0.00124487831885 0.00251211366687
col 800 80 2.5 0.422998849227 0.00106200687991 0.00118370792634
col 900 80 2.5 0.424769185331 0.00105948893132 0.00116914968329
col 1000 80 2.5 0.426735982509 0.000821819131822 0.00186405195367
col 400 80 3.0 0.406694450189 0.00225917144783 0.00138453885278
col 500 80 3.0 0.412255111977 0.00163320859802 0.00285192311837
col 550 80 3.0 0.413680314034 0.00146763651685 0.00393779717846
col 600 80 3.0 0.41565026086 0.00158314614369 0.00196494790488
col 700 80 3.0 0.418041234707 0.00132158953983 0.0017260775516
col 800 80 3.0 0.419757419187 0.00114829119648 0.00349634508781
col 900 80 3.0 0.422288740293 0.00113585983573 0.00156613090277
col 1000 80 3.0 0.42375485867 0.000880059107358 0.00408020116583
col 400 80 4.0 0.404355183579 0.0024365144942 0.00382968667298
col 500 80 4.0 0.409338559403 0.00179147109126 0.0040667667644
col 550 80 4.0 0.410835123495 0.00161626156441 0.00345008581413
col 600 80 4.0 0.412200841211 0.00175118433908 0.00390316488337
col 700 80 4.0 0.414403086817 0.0014732236654 0.00675175957098
col 800 80 4.0 0.416285946211 0.00127073165897 0.00445107610491
col 900 80 4.0 0.418157027435 0.00127212345338 0.00213114979701
col 1000 80 4.0 0.419168017004 0.000987010101133 0.00516733746423
col 400 80 5.0 0.401858635567 0.00259196421737 0.00363649824883
col 500 80 5.0 0.406320455757 0.00190862877191 0.00304219197286
col 550 80 5.0 0.408405188347 0.00172877573996 0.00478581933673
col 600 80 5.0 0.409718031925 0.00187029231571 0.0032609553907
col 700 80 5.0 0.411510426356 0.00158157553972 0.0024987012328
col 800 80 5.0 0.412127105455 0.00137737270702 0.00673636177452
col 900 80 5.0 0.414268730214 0.00137447937617 0.00198823420821
col 1000 80 5.0 0.415959276794 0.00106851879502 0.0070465571266
col 400 90 0.266 0.50824172543 0.0014264762476 0.0104355614248
col 500 90 0.266 0.534986773848 0.000905689489912 0.0120845426254
col 550 90 0.266 0.547170933672 0.00075867963782 0.0135095573168
col 600 90 0.266 0.558463296397 0.000766689546402 0.0134544584758
col 700 90 0.266 0.579973988887 0.000562309789839 0.0155372352287
col 800 90 0.266 0.599154469307 0.00043217054574 0.0151621357902
col 900 90 0.266 0.617965415451 0.000386836677154 0.0159160437869
col 1000 90 0.266 0.634953719019 0.000272422888983 0.0201687360482
col 400 90 0.375 0.451237998621 0.00166399064325 0.00144647927138
col 500 90 0.375 0.468808926101 0.00110794486212 0.00522525092042
col 550 90 0.375 0.476276682896 0.000952044765718 0.0037250327254
col 600 90 0.375 0.484303234955 0.000983870326361 0.0033285063299
col 700 90 0.375 0.499523700763 0.000752780423501 0.00570036927558
col 800 90 0.375 0.51427001876 0.000595812861425 0.00564283853022
col 900 90 0.375 0.528837164326 0.000546403625719 0.00352087447162
col 1000 90 0.375 0.542723256035 0.00039107920748 0.00338759838053
col 400 90 0.5 0.433822552931 0.00173310140313 0.00137776979122
col 500 90 0.5 0.446749911576 0.00117024432676 0.00279400000246
col 550 90 0.5 0.452696484093 0.00101179081079 0.00433441993079
col 600 90 0.5 0.458255603522 0.00105744658247 0.0040100238727
col 700 90 0.5 0.468408138031 0.000832085382768 0.0062265496297
col 800 90 0.5 0.478171902415 0.000677690108175 0.00698082206679
col 900 90 0.5 0.488105243463 0.000638885497753 0.00644034222568
col 1000 90 0.5 0.498001189132 0.000468434971745 0.00650326296592
col 400 90 0.75 0.42017598492 0.00183025119005 0.00253906884049
col 500 90 0.75 0.42989760157 0.00125443792249 0.00223703709806
col 550 90 0.75 0.433955364936 0.00109428473943 0.00335833822623
col 600 90 0.75 0.437468089276 0.00115222434132 0.0028788496435
col 700 90 0.75 0.444724327812 0.000918744348531 0.00462537188611
col 800 90 0.75 0.451110888655 0.000764723344409 0.00514260242956
col 900 90 0.75 0.4572412324 0.000738377864413 0.00414579692329
col 1000 90 0.75 0.463440122533 0.000556026154155 0.00554370998484
col 400 90 1.0 0.414853136821 0.00191310662174 0.00136430820031
col 500 90 1.0 0.422677050324 0.00132922492727 0.00235877284538
col 550 90 1.0 0.426145225502 0.00116650451049 0.00318105011326
col 600 90 1.0 0.428847364254 0.00123539844397 0.00252751099512
col 700 90 1.0 0.434248611129 0.000997099923132 0.00366104598212
col 800 90 1.0 0.438926741919 0.000835815992433 0.00472299230212
col 900 90 1.0 0.443792627863 0.00081247467981 0.00290518046343
col 1000 90 1.0 0.44833349366 0.000617896819557 0.00274297543218
col 400 90 1.5 0.408642378275 0.00209672443003 0.00303246235968
col 500 90 1.5 0.415544782455 0.00148076623542 5.45713151439e-05
col 550 90 1.5 0.417967139123 0.00131041635792 0.000289504347289
col 600 90 1.5 0.420439009188 0.00140056633633 0.00231187198243
col 700 90 1.5 0.424470555983 0.00114493551291 0.00238939539237
col 800 90 1.5 0.427777782148 0.000970546690698 0.0028144043043
col 900 90 1.5 0.431022504224 0.000952279197067 0.00198064842893
col 1000 90 1.5 0.43427961516 0.000725847579978 0.00658161702912
col 400 90 2.0 0.406144376679 0.00227393712169 0.00735105111113
col 500 90 2.0 0.410982257032 0.00164705648546 0.00316318841185
col 550 90 2.0 0.413825864131 0.00145400509486 0.00238747815134
col 600 90 2.0 0.416343225889 0.00155349970208 0.000862784986764
col 700 90 2.0 0.419318673626 0.00127669567133 0.00230959378186
col 800 90 2.0 0.421755343869 0.00108861446649 0.00384993047405
col 900 90 2.0 0.424731326711 0.00106674106065 0.00233929681196
col 1000 90 2.0 0.427138275683 0.000813817088993 0.00227371666862
col 400 90 2.5 0.40373784146 0.00247849340318 0.00139855317697
col 500 90 2.5 0.408755186766 0.00179538916864 0.00223859652234
col 550 90 2.5 0.411198171928 0.00157722495064 0.00359161412703
col 600 90 2.5 0.413123302091 0.00168471560686 0.00176666071716
col 700 90 2.5 0.416165612616 0.0013924997553 0.0100681215641
col 800 90 2.5 0.418465539888 0.00117920906842 0.000941186935556
col 900 90 2.5 0.420933762536 0.00116582332827 0.00245603983629
col 1000 90 2.5 0.422508772035 0.0008972127985 0.00262148843687
col 400 90 3.0 0.401924247929 0.00263514960078 0.00273311554942
col 500 90 3.0 0.408395322549 0.00188240953321 0.00340208293291
col 550 90 3.0 0.409317823541 0.00168091058965 0.00393286924092
col 600 90 3.0 0.411046159708 0.00179779975028 0.00134408786229
col 700 90 3.0 0.414280860113 0.00147509387009 0.00114610607287
col 800 90 3.0 0.416045389891 0.00126664370953 0.00115994272481
col 900 90 3.0 0.417670246272 0.00125121103585 0.00245921886356
col 1000 90 3.0 0.419242363642 0.000960481265313 0.00264290420242
col 400 90 4.0 0.39958291164 0.0028641237763 0.00411998925155
col 500 90 4.0 0.40503871472 0.00205190306859 0.0031121836996
col 550 90 4.0 0.406687788857 0.00183630235769 0.00341722928093
col 600 90 4.0 0.408361701937 0.00197693647266 0.00337380559908
col 700 90 4.0 0.410421361046 0.00163357693189 0.000998394220238
col 800 90 4.0 0.412594132475 0.00140562467214 0.0065186035611
col 900 90 4.0 0.413906127605 0.00139070235538 0.0027992852595
col 1000 90 4.0 0.415358475232 0.00107116398014 0.00503351433552
col 400 90 5.0 0.397647196337 0.00306527991839 0.00576304847261
col 500 90 5.0 0.403107254395 0.00220019029883 0.00531207295104
col 550 90 5.0 0.404685436824 0.00196429239222 0.00404699738183
col 600 90 5.0 0.405810005253 0.00210455869429 0.00489852823519
col 700 90 5.0 0.408543484377 0.00174361239154 0.00284741698686
col 800 90 5.0 0.409565631535 0.00150885624384 0.0020697655966
col 900 90 5.0 0.411298683284 0.00150106975678 0.00330677710086
col 1000 90 5.0 0.41125504155 0.00116355321603 0.00351138691229
dro 400 5 0.266 0.973319648959 1.4861497066e-05 0.0560868273545
dro 500 5 0.266 0.982122173737 9.54288225022e-06 0.0520931093827
dro 550 5 0.266 0.984711403696 7.97274359446e-06 0.00238044548782
dro 600 5 0.266 0.987947139739 7.92124685009e-06 0.0880242145878
dro 700 5 0.266 0.99087586524 5.63449997537e-06 0.0679145673603
dro 800 5 0.266 0.992901605431 4.21245182983e-06 0.050765264971
dro 900 5 0.266 0.994354066823 5.78410196117e-06 0.0703555613898
dro 1000 5 0.266 0.995381393273 2.45420635241e-06 0.0384266417557
dro 400 5 0.375 0.949869296823 2.81260641051e-05 0.0586867644694
dro 500 5 0.375 0.965708992594 1.83319800131e-05 0.0542153477273
dro 550 5 0.375 0.970488791081 1.54009020049e-05 0.0041951482404
dro 600 5 0.375 0.976543422652 1.53565623278e-05 0.0895657600648
dro 700 5 0.375 0.98209369556 1.09865491261e-05 0.0691288340064
dro 800 5 0.375 0.985978580139 8.24842478667e-06 0.051770970618
dro 900 5 0.375 0.988758673246 8.4246006446e-06 0.0711988571979
dro 1000 5 0.375 0.990761788269 4.82937120354e-06 0.0391235088288
dro 400 5 0.5 0.918284973483 4.67435816025e-05 0.0610783664479
dro 500 5 0.5 0.942628907544 3.10898256621e-05 0.0566440597037
dro 550 5 0.5 0.950263217445 2.63081663023e-05 0.00644156692788
dro 600 5 0.5 0.960116834325 2.63471564151e-05 0.0917179128691
dro 700 5 0.5 0.969296633559 1.89964445796e-05 0.07090315146
dro 800 5 0.5 0.975799437853 1.43466371338e-05 0.0532579828197
dro 900 5 0.5 0.980523855068 1.32260856264e-05 0.0725245827527
dro 1000 5 0.5 0.983953716649 8.46202827184e-06 0.0402136683764
dro 400 5 0.75 0.851214449984 8.80727231116e-05 0.0622786420444
dro 500 5 0.75 0.889115275761 6.21253607662e-05 0.0595037002477
dro 550 5 0.75 0.90203957901 5.35879662458e-05 0.00954571050278
dro 600 5 0.75 0.919795857309 5.42915520311e-05 0.0952481430751
dro 700 5 0.75 0.93671494427 3.99041583088e-05 0.0742189169952
dro 800 5 0.75 0.949244046676 3.0551008835e-05 0.0564164795531
dro 900 5 0.75 0.958614925042 2.71140317499e-05 0.0755046443961
dro 1000 5 0.75 0.965591519909 1.83272969066e-05 0.0427693651286
dro 400 5 1.0 0.79070120665 0.000122369925643 0.059348996865
dro 500 5 1.0 0.835295494755 9.46590255026e-05 0.0591963562158
dro 550 5 1.0 0.851634788674 8.35170640254e-05 0.00997754717567
dro 600 5 1.0 0.875717945875 8.60723210718e-05 0.0968654091697
dro 700 5 1.0 0.899344233353 6.5132791031e-05 0.0763577447796
dro 800 5 1.0 0.91746467111 5.07329602458e-05 0.0589232701291
dro 900 5 1.0 0.931637259921 4.51541786819e-05 0.0782464489975
dro 1000 5 1.0 0.942558845302 3.10907171249e-05 0.0453763555981
dro 400 5 1.5 0.703826691431 0.000164455027466 0.0540678213283
dro 500 5 1.5 0.747109054587 0.000135350208081 0.0540983404193
dro 550 5 1.5 0.765100163468 0.000126859466246 0.00607019212205
dro 600 5 1.5 0.794641981225 0.000139682639887 0.0947954923356
dro 700 5 1.5 0.825433330155 0.000117180882481 0.0764124107786
dro 800 5 1.5 0.850262467326 9.4957725921e-05 0.0604283559895
dro 900 5 1.5 0.871520111156 8.72020170101e-05 0.0810803723586
dro 1000 5 1.5 0.889484912675 6.21106219684e-05 0.0489767251833
dro 400 5 2.0 0.64919244223 0.000202246568676 0.0581570743229
dro 500 5 2.0 0.686253959561 0.000165073136476 0.0516411596989
dro 550 5 2.0 0.703097733897 0.000154968318653 0.00180082182925
dro 600 5 2.0 0.732047787971 0.000169502789587 0.0904710995238
dro 700 5 2.0 0.764097971353 0.000148918894717 0.0733039293777
dro 800 5 2.0 0.790350383212 0.000128885377325 0.0586758315461
dro 900 5 2.0 0.814015286783 0.000126393547012 0.0803997487088
dro 1000 5 2.0 0.836121900787 9.44110195848e-05 0.0494639983371
dro 400 5 2.5 0.614461635554 0.000240179765686 0.0580628158234
dro 500 5 2.5 0.644289130719 0.000194321729442 0.0548646713172
dro 550 5 2.5 0.658966923133 0.0001814107239 0.00511617932438
dro 600 5 2.5 0.685590669442 0.000195888213279 0.0883029043606
dro 700 5 2.5 0.716801966272 0.000172584337741 0.0701510396605
dro 800 5 2.5 0.741686886858 0.000150086654044 0.056029992049
dro 900 5 2.5 0.764908807532 0.000149710827687 0.0782203816357
dro 1000 5 2.5 0.788412751629 0.000117422256909 0.0481241742264
dro 400 5 3.0 0.590733026981 0.00027673106618 0.057750252641
dro 500 5 3.0 0.615169090526 0.000224991579515 0.0554819193711
dro 550 5 3.0 0.627752801139 0.000208768240996 0.00520153727535
dro 600 5 3.0 0.651096186819 0.000222542071439 0.0909621885429
dro 700 5 3.0 0.680424124786 0.000194731236665 0.0687468641908
dro 800 5 3.0 0.702910499179 0.000169347214717 0.0535771224171
dro 900 5 3.0 0.724688813464 0.000168948723134 0.0760202069958
dro 1000 5 3.0 0.748103682193 0.000132921766664 0.0465312555741
dro 400 5 4.0 0.560223723303 0.00033246074321 0.0558136224077
dro 500 5 4.0 0.578426961048 0.000283675729232 0.0529441890329
dro 550 5 4.0 0.58739879977 0.000263136913653 0.00382017501204
dro 600 5 4.0 0.605125685545 0.000278199957015 0.0902654828246
dro 700 5 4.0 0.629688960353 0.000240525132337 0.0687580904924
dro 800 5 4.0 0.646984815318 0.00020685273994 0.0526725303153
dro 900 5 4.0 0.664675688555 0.000205815418723 0.0729951868879
dro 1000 5 4.0 0.685734822022 0.000160184728567 0.0437529263692
dro 400 5 5.0 0.540709124016 0.000382279409656 0.0564596061521
dro 500 5 5.0 0.555029649238 0.000324842474399 0.0525533636601
dro 550 5 5.0 0.562349566076 0.000307016287182 0.00252875348075
dro 600 5 5.0 0.576477970223 0.000329763228931 0.0888653040384
dro 700 5 5.0 0.596878425689 0.000283837440734 0.0697052815645
dro 800 5 5.0 0.610085482897 0.000245648112666 0.0528960824199
dro 900 5 5.0 0.623709243972 0.000244043026113 0.0727347691443
dro 1000 5 5.0 0.641063729304 0.000186856687599 0.0427748142917
dro 400 10 0.266 0.915567704969 3.39060256978e-05 0.0175047810754
dro 500 10 0.266 0.940200386874 2.18505834232e-05 0.0235310119593
dro 550 10 0.266 0.947923066558 1.82693193947e-05 0.00699861643569
dro 600 10 0.266 0.955911704618 1.82556307003e-05 0.0170238150218
dro 700 10 0.266 0.96596494414 1.31522395768e-05 0.0200365099672
dro 800 10 0.266 0.973431287344 9.81314811749e-06 0.0138675789479
dro 900 10 0.266 0.978734046528 9.60192156745e-06 0.0188843938766
dro 1000 10 0.266 0.982207141752 5.78494226209e-06 0.00924668794782
dro 400 10 0.375 0.857642052652 6.10381940385e-05 0.0189255146085
dro 500 10 0.375 0.894735410136 4.02168532707e-05 0.0260984943312
dro 550 10 0.375 0.90693011226 3.39647662413e-05 0.00976444254649
dro 600 10 0.375 0.920161992205 3.41929555189e-05 0.0198249008764
dro 700 10 0.375 0.937051027225 2.49390229189e-05 0.0228182775426
dro 800 10 0.375 0.950075432577 1.87832919023e-05 0.0163059023654
dro 900 10 0.375 0.959593355945 1.69595494838e-05 0.0210897623853
dro 1000 10 0.375 0.965882389095 1.1204586908e-05 0.0112277942228
dro 400 10 0.5 0.795782352406 9.54777268862e-05 0.016814950448
dro 500 10 0.5 0.841672051761 6.48850711045e-05 0.0262991350892
dro 550 10 0.5 0.857460489211 5.53742611308e-05 0.0106221112822
dro 600 10 0.5 0.875690969965 5.61903222485e-05 0.0212347018752
dro 700 10 0.5 0.899376127124 4.15475130793e-05 0.0249800796382
dro 800 10 0.5 0.918704210964 3.16649677953e-05 0.0186285749194
dro 900 10 0.5 0.933166828943 2.81834821142e-05 0.0234451478258
dro 1000 10 0.5 0.942951966991 1.91861936112e-05 0.0135111863922
dro 400 10 0.75 0.702958583169 0.000143605133843 0.00888676377894
dro 500 10 0.75 0.751857037514 0.000111010532315 0.0209906661671
dro 550 10 0.75 0.769820628603 0.000100172477325 0.00662037187979
dro 600 10 0.75 0.793203292153 0.000106536431601 0.0187456480571
dro 700 10 0.75 0.823840139658 8.105935379e-05 0.024509588166
dro 800 10 0.75 0.851976845498 6.30313835571e-05 0.0197301391033
dro 900 10 0.75 0.874204549474 5.64992232563e-05 0.0256283785392
dro 1000 10 0.75 0.889915945285 3.93739290095e-05 0.0162710327963
dro 400 10 1.0 0.64485086389 0.000176647545645 0.0129553290305
dro 500 10 1.0 0.688676795629 0.000143394832271 0.0181381050727
dro 550 10 1.0 0.70550265851 0.000131277379751 0.00168738404026
dro 600 10 1.0 0.729513490312 0.000142871137167 0.0139227901269
dro 700 10 1.0 0.760613200023 0.000117920096953 0.0209003701947
dro 800 10 1.0 0.792023328083 9.81225982571e-05 0.0173956111969
dro 900 10 1.0 0.817909017163 8.97174686142e-05 0.0245600990438
dro 1000 10 1.0 0.836659560973 6.32223144092e-05 0.0161396454506
dro 400 10 1.5 0.585973336775 0.000210666913743 0.013289176234
dro 500 10 1.5 0.616186462051 0.00017791943494 0.0216353500528
dro 550 10 1.5 0.627679423432 0.000169776629856 0.00608131055689
dro 600 10 1.5 0.648718782656 0.00019198369712 0.015860909332
dro 700 10 1.5 0.674064263408 0.000168668920833 0.0188670490647
dro 800 10 1.5 0.70447226598 0.00014481053654 0.0117813484561
dro 900 10 1.5 0.73017744866 0.000142026979115 0.0190849899518
dro 1000 10 1.5 0.749244768049 0.000107385374276 0.0113979422664
dro 400 10 2.0 0.555757652239 0.000241795230152 0.0125873953741
dro 500 10 2.0 0.580084688222 0.000199743201045 0.0207071045393
dro 550 10 2.0 0.588674856281 0.000190258715985 0.00591040151242
dro 600 10 2.0 0.605672180904 0.000213719968872 0.0172812493905
dro 700 10 2.0 0.623917374262 0.000195024073982 0.0214568584441
dro 800 10 2.0 0.64916972055 0.000174651703463 0.0153923664212
dro 900 10 2.0 0.671131178394 0.000177942005094 0.0201145651877
dro 1000 10 2.0 0.688369159805 0.000138172590794 0.00956580888878
dro 400 10 2.5 0.538431890475 0.000274810771069 0.0116198166814
dro 500 10 2.5 0.556973718752 0.000224077533497 0.0199919797721
dro 550 10 2.5 0.564278182806 0.000211241942274 0.0042392731972
dro 600 10 2.5 0.579296216184 0.000232947628789 0.0153272908651
dro 700 10 2.5 0.594396469502 0.000211847119447 0.0197933417647
dro 800 10 2.5 0.614914940509 0.000190069520366 0.0161184316225
dro 900 10 2.5 0.632162045956 0.000196282387794 0.0213275387093
dro 1000 10 2.5 0.646301599178 0.000157958788515 0.0115209783446
dro 400 10 3.0 0.526541365021 0.000309166190942 0.00948245678418
dro 500 10 3.0 0.542825578272 0.000250427373698 0.0174514606838
dro 550 10 3.0 0.548128631242 0.000234422379709 0.00323394713652
dro 600 10 3.0 0.560291177968 0.000255082946766 0.0146586125321
dro 700 10 3.0 0.573723100641 0.000229025088562 0.018058340748
dro 800 10 3.0 0.592403266284 0.000203354947952 0.0140491707467
dro 900 10 3.0 0.606047844468 0.000209619062311 0.0204130563028
dro 1000 10 3.0 0.617767219752 0.000169169613472 0.0119168507964
dro 400 10 4.0 0.511606300132 0.000364097533013 0.0103443287805
dro 500 10 4.0 0.524271226053 0.000306303133205 0.0175930800018
dro 550 10 4.0 0.528108115123 0.000284893459228 0.001834325735
dro 600 10 4.0 0.537896957399 0.000304234848545 0.0122918932843
dro 700 10 4.0 0.547191742941 0.000267979827292 0.0169000140115
dro 800 10 4.0 0.561460265822 0.000233733159931 0.0127896286887
dro 900 10 4.0 0.572005776368 0.000237507846964 0.0182798978772
dro 1000 10 4.0 0.581652151573 0.000188170709793 0.00917930953846
dro 400 10 5.0 0.501615508636 0.000416821894154 0.0134311095815
dro 500 10 5.0 0.512524720647 0.000347758540991 0.0209956795455
dro 550 10 5.0 0.515626913363 0.000327988866791 0.00507627427747
dro 600 10 5.0 0.524020463195 0.000353025537811 0.0160807734553
dro 700 10 5.0 0.530922148219 0.000308079956327 0.0195454779131
dro 800 10 5.0 0.543030579583 0.000267657165946 0.0139488862755
dro 900 10 5.0 0.550606899197 0.00026944433278 0.0193505913489
dro 1000 10 5.0 0.556876380602 0.000210214250382 0.00911633527346
dro 400 15 0.266 0.85739882312 5.95760990003e-05 0.0122133693805
dro 500 15 0.266 0.892028095616 3.90334302946e-05 0.014395624177
dro 550 15 0.266 0.904313249956 3.27398385463e-05 0.010904430798
dro 600 15 0.266 0.915866149532 3.30095194783e-05 0.00879127488221
dro 700 15 0.266 0.93334944577 2.39849122748e-05 0.012687510319
dro 800 15 0.266 0.946153704953 1.80021430852e-05 0.00947984123166
dro 900 15 0.266 0.955844049536 1.63221233877e-05 0.00668329584984
dro 1000 15 0.266 0.962936069728 1.07293659352e-05 0.00769718883726
dro 400 15 0.375 0.779230412644 9.98094449144e-05 0.00897517165587
dro 500 15 0.375 0.824176355581 6.89685284014e-05 0.0139859504485
dro 550 15 0.375 0.841098243065 5.86441605762e-05 0.0115172905662
dro 600 15 0.375 0.857733154385 5.97742635176e-05 0.0101009897241
dro 700 15 0.375 0.883878625923 4.42038694675e-05 0.0149470601425
dro 800 15 0.375 0.904105312363 3.36228870709e-05 0.0121685995691
dro 900 15 0.375 0.919918617826 2.99442501847e-05 0.0095271050307
dro 1000 15 0.375 0.931803172238 2.03948535408e-05 0.0105515153641
dro 400 15 0.5 0.710293466701 0.000137732946175 0.00248483769904
dro 500 15 0.5 0.757225654557 0.000101129727897 0.00955473714677
dro 550 15 0.5 0.775865382884 8.91915390635e-05 0.00810625700424
dro 600 15 0.5 0.795548381884 9.350125687e-05 0.00784980223504
dro 700 15 0.5 0.827453063162 7.0846584941e-05 0.0145349638273
dro 800 15 0.5 0.853639130191 5.48208096178e-05 0.0127933709437
dro 900 15 0.5 0.87501803545 4.9120889682e-05 0.0108963091215
dro 1000 15 0.5 0.891684463 3.40401072639e-05 0.0125150010629
dro 400 15 0.75 0.62886772261 0.000183255618598 0.00499710608698
dro 500 15 0.75 0.667870915991 0.000146459387046 0.00625098021357
dro 550 15 0.75 0.683981124901 0.000134477309769 0.00224783046767
dro 600 15 0.75 0.70308326013 0.000147171104136 0.000473636063887
dro 700 15 0.75 0.735174389697 0.000119348736591 0.00787565718707
dro 800 15 0.75 0.765032428507 9.87296791112e-05 0.00812540090369
dro 900 15 0.75 0.791193515054 9.24420690567e-05 0.00824056782326
dro 1000 15 0.75 0.812610051243 6.58127193109e-05 0.0112626936174
dro 400 15 1.0 0.585793835448 0.000219012197326 0.00704734039143
dro 500 15 1.0 0.617549129864 0.000174586648832 0.00837589264629
dro 550 15 1.0 0.63071768086 0.000161733727354 0.00568295494812
dro 600 15 1.0 0.64734968207 0.000179833278949 0.00451952863598
dro 700 15 1.0 0.674126671806 0.000154000157991 0.00808360660881
dro 800 15 1.0 0.701849095263 0.000133344619187 0.00448361553371
dro 900 15 1.0 0.72665088584 0.000128473954539 0.00292321003791
dro 1000 15 1.0 0.747925166098 9.5167334692e-05 0.00675683075207
dro 400 15 1.5 0.545941473901 0.000296053513984 0.00483407743567
dro 500 15 1.5 0.565583407462 0.00023161357746 0.00836834089898
dro 550 15 1.5 0.573832364733 0.000212041384546 0.00575905237629
dro 600 15 1.5 0.586712785411 0.000231546445771 0.00654071888671
dro 700 15 1.5 0.606090208697 0.000198014762623 0.0104730609673
dro 800 15 1.5 0.62898706947 0.00017375016956 0.00744931043811
dro 900 15 1.5 0.648219087547 0.000175296136707 0.00547568641716
dro 1000 15 1.5 0.664223148047 0.000136147771784 0.00681968428024
dro 400 15 2.0 0.526146896755 0.000341163915192 0.00341476785382
dro 500 15 2.0 0.542033132687 0.000287783961928 0.00631389583777
dro 550 15 2.0 0.547615980194 0.000269694431356 0.00476202594442
dro 600 15 2.0 0.557333712624 0.000290531335705 0.00480489952067
dro 700 15 2.0 0.570386062617 0.000244659105799 0.0103527329562
dro 800 15 2.0 0.588327740961 0.000209132972624 0.00850502309803
dro 900 15 2.0 0.603958770296 0.000208277960273 0.00547239070177
dro 1000 15 2.0 0.617023593651 0.000162316917799 0.00747412544533
dro 400 15 2.5 0.515101443407 0.000396803835378 0.000954779925685
dro 500 15 2.5 0.52680945228 0.000320745516806 0.00457815565807
dro 550 15 2.5 0.531817286528 0.000302951526645 0.00167017067488
dro 600 15 2.5 0.540551772357 0.000336414361098 0.00250526667662
dro 700 15 2.5 0.550534024353 0.000295885468284 0.00783033425364
dro 800 15 2.5 0.564893000384 0.000249966642054 0.00703221185314
dro 900 15 2.5 0.5763273101 0.000244158352198 0.00544405773102
dro 1000 15 2.5 0.586364234038 0.000188884929525 0.0076499645711
dro 400 15 3.0 0.507267937711 0.00043823390152 0.00175643707406
dro 500 15 3.0 0.517683969071 0.000370251177963 0.00503818291083
dro 550 15 3.0 0.521290311332 0.000345728013771 0.00200582258272
dro 600 15 3.0 0.527867968834 0.000367842674684 0.00197713174552
dro 700 15 3.0 0.537427212181 0.000328836974871 0.00656657439705
dro 800 15 3.0 0.550205001741 0.000291006622121 0.00500533174056
dro 900 15 3.0 0.558754502281 0.000284235323957 0.00331976615503
dro 1000 15 3.0 0.566757452218 0.00021868548588 0.00640213133478
dro 400 15 4.0 0.496651002799 0.00050880223198 0.00175696624704
dro 500 15 4.0 0.505236294982 0.000439486025064 0.00605630528483
dro 550 15 4.0 0.507805000607 0.000408045647408 0.00247313683131
dro 600 15 4.0 0.513492619277 0.000445317154854 0.00197016675192
dro 700 15 4.0 0.519978797589 0.000399582181313 0.00682696362647
dro 800 15 4.0 0.529630792137 0.000338115080619 0.00354198202277
dro 900 15 4.0 0.536882193219 0.000341195495816 0.00204243786956
dro 1000 15 4.0 0.543057420399 0.000273196678522 0.00347030911115
dro 400 15 5.0 0.489734487273 0.000571106948979 0.00530616528049
dro 500 15 5.0 0.496974032833 0.000484618715529 0.00820113498919
dro 550 15 5.0 0.499531474766 0.000465826287043 0.00611723476677
dro 600 15 5.0 0.504073571286 0.00051538310481 0.00442711773622
dro 700 15 5.0 0.508679713792 0.000447394286266 0.00947603303457
dro 800 15 5.0 0.517827314876 0.000393873998101 0.00739696003681
dro 900 15 5.0 0.522784212207 0.000398344426279 0.00544396439947
dro 1000 15 5.0 0.526684657302 0.000303183114976 0.00672367820901
dro 400 20 0.266 0.80932067608 8.89778953742e-05 0.0119203207996
dro 500 20 0.266 0.848168069809 5.92998949586e-05 0.0120577512852
dro 550 20 0.266 0.863185812197 4.9872245566e-05 0.0131492591126
dro 600 20 0.266 0.876778433188 5.05397718072e-05 0.0103606815082
dro 700 20 0.266 0.899125310006 3.69652904928e-05 0.011285699486
dro 800 20 0.266 0.916258937962 2.79006855708e-05 0.0104137700014
dro 900 20 0.266 0.929704435825 2.49024462785e-05 0.00845385857362
dro 1000 20 0.266 0.940161477312 1.68008297458e-05 0.00823300369054
dro 400 20 0.375 0.722526637521 0.000136132660017 0.00594382801371
dro 500 20 0.375 0.767855502985 9.86690253601e-05 0.00791280115538
dro 550 20 0.375 0.786384690273 8.57835113878e-05 0.0104562606247
dro 600 20 0.375 0.803975041253 8.90097017181e-05 0.00922890323585
dro 700 20 0.375 0.834204860197 6.64908234584e-05 0.0115828860441
dro 800 20 0.375 0.858563492056 5.09457764561e-05 0.0118004583555
dro 900 20 0.375 0.878533585676 4.54792707272e-05 0.00974038909045
dro 1000 20 0.375 0.894725030243 3.13237534886e-05 0.0108617864213
dro 400 20 0.5 0.656500648719 0.000175978244772 0.00327250742325
dro 500 20 0.5 0.698768371897 0.000132367371083 0.00167766273657
dro 550 20 0.5 0.717125027473 0.000118612070273 0.00414566774395
dro 600 20 0.5 0.735580812123 0.000127190595414 0.00512615274703
dro 700 20 0.5 0.768503646397 0.000101004421076 0.00803218921109
dro 800 20 0.5 0.796722514932 8.06240981552e-05 0.0096647806118
dro 900 20 0.5 0.821042428223 7.29031323439e-05 0.00930971881013
dro 1000 20 0.5 0.841461350057 5.10132485757e-05 0.0109691601372
dro 400 20 0.75 0.588992069546 0.000239964133944 0.00782432818673
dro 500 20 0.75 0.619422899014 0.000184352611487 0.00638250536748
dro 550 20 0.75 0.633198741316 0.000166225492641 0.00498642647093
dro 600 20 0.75 0.648326924375 0.000180066806877 0.00630185517963
dro 700 20 0.75 0.676776905264 0.000149389324152 0.00276720955557
dro 800 20 0.75 0.703890286098 0.000127210951381 0.00192088433974
dro 900 20 0.75 0.728873779616 0.00012311653076 0.00367380871485
dro 1000 20 0.75 0.75107864308 9.07620036334e-05 0.00564067711375
dro 400 20 1.0 0.556677159452 0.000281515869032 0.00716249081911
dro 500 20 1.0 0.58018897307 0.000226749065017 0.00681650694477
dro 550 20 1.0 0.59053049033 0.000209014006241 0.00591047550609
dro 600 20 1.0 0.602380613555 0.00022827049493 0.00836478780369
dro 700 20 1.0 0.62402224822 0.000188765171432 0.00590245828007
dro 800 20 1.0 0.646454502085 0.000160849134802 0.00573733263917
dro 900 20 1.0 0.667892037428 0.000157565367541 0.00598645302613
dro 1000 20 1.0 0.687742555475 0.000119326909847 0.00352930751709
dro 400 20 1.5 0.526818827372 0.000380120334019 0.00521201760468
dro 500 20 1.5 0.541224223909 0.000298117420236 0.00541273809325
dro 550 20 1.5 0.547812029308 0.000272685703119 0.00464888351569
dro 600 20 1.5 0.556268835287 0.000296563401594 0.0077223567153
dro 700 20 1.5 0.571175805557 0.000254380246522 0.00481070213235
dro 800 20 1.5 0.588101628439 0.000223707803092 0.00572199934682
dro 900 20 1.5 0.602498722528 0.000220768671777 0.00861219889518
dro 1000 20 1.5 0.615450319789 0.000166912747613 0.00699412616416
dro 400 20 2.0 0.512332204564 0.000423331881178 0.00382703061103
dro 500 20 2.0 0.523906324584 0.00037305150547 0.00303478543197
dro 550 20 2.0 0.528260417668 0.000344819163697 0.00237104109367
dro 600 20 2.0 0.534486778422 0.000371502207535 0.00567924960574
dro 700 20 2.0 0.544457234619 0.000314739713698 0.00383871201779
dro 800 20 2.0 0.557435896723 0.000267721939222 0.00467928617067
dro 900 20 2.0 0.568961857577 0.000267229452002 0.00765020065119
dro 1000 20 2.0 0.579270331338 0.000208591915804 0.00472412146221
dro 400 20 2.5 0.504074057332 0.000493637415781 0.00221574540919
dro 500 20 2.5 0.512543897782 0.000398876733362 0.00220221139727
dro 550 20 2.5 0.516627925178 0.000382062945312 0.0013321530842
dro 600 20 2.5 0.522349076203 0.00043718475969 0.00326810972133
dro 700 20 2.5 0.529593623862 0.000378075240825 0.00293864343886
dro 800 20 2.5 0.540054990928 0.00032059261814 0.00280244856772
dro 900 20 2.5 0.548320636876 0.00031504786808 0.0066075679697
dro 1000 20 2.5 0.555976862616 0.000240998901538 0.00504058492247
dro 400 20 3.0 0.498434386286 0.000534703703332 0.001658774595
dro 500 20 3.0 0.505761096998 0.000465956679708 0.000568639054588
dro 550 20 3.0 0.508728260962 0.000439703032369 0.00110010930442
dro 600 20 3.0 0.512962862966 0.000459966896631 0.00292232355594
dro 700 20 3.0 0.520236494934 0.000422571487731 0.000906390567278
dro 800 20 3.0 0.529000116428 0.000376022924032 0.00159473392697
dro 900 20 3.0 0.535210505446 0.000363484853077 0.00484466646297
dro 1000 20 3.0 0.541462145281 0.000280956586479 0.00370316102595
dro 400 20 4.0 0.490160927871 0.000610757825237 0.00133690207153
dro 500 20 4.0 0.496262486283 0.000532020952432 0.00181332105581
dro 550 20 4.0 0.49870282145 0.0004976080427 0.00384117939095
dro 600 20 4.0 0.502292180216 0.000553458589992 0.00295097667463
dro 700 20 4.0 0.507089464682 0.000509804572172 0.00330028559404
dro 800 20 4.0 0.5135571781 0.000421705997775 0.00250132083729
dro 900 20 4.0 0.519185943162 0.000436173012054 0.00426194995304
dro 1000 20 4.0 0.523848993575 0.000354666147553 0.00288591978465
dro 400 20 5.0 0.484542119729 0.000680707285803 0.00388613618135
dro 500 20 5.0 0.490001037499 0.000581576825818 0.00496695083771
dro 550 20 5.0 0.491870130228 0.00056145049876 0.00606769715272
dro 600 20 5.0 0.494698081335 0.000628419966869 0.00575756952933
dro 700 20 5.0 0.498334457464 0.000549566600213 0.00607491084378
dro 800 20 5.0 0.505015413879 0.000492290027516 0.00683851990868
dro 900 20 5.0 0.508539666283 0.000509114211185 0.00586834109967
dro 1000 20 5.0 0.511349636835 0.000377701891959 0.00550553636084
dro 400 25 0.266 0.771019735432 0.000118501302164 0.0127994245217
dro 500 25 0.266 0.810649374183 8.18979788882e-05 0.0120068904116
dro 550 25 0.266 0.827018274667 6.9191835669e-05 0.0142160654153
dro 600 25 0.266 0.841610593585 7.03670410983e-05 0.0111945836827
dro 700 25 0.266 0.866737540119 5.17450427931e-05 0.0118742723566
dro 800 25 0.266 0.886778046933 3.92356657175e-05 0.0120857351778
dro 900 25 0.266 0.9030111351 3.4902068377e-05 0.0109658154607
dro 1000 25 0.266 0.916219870607 2.38211478629e-05 0.0096621042114
dro 400 25 0.375 0.681745345793 0.000173192092138 0.00310152165404
dro 500 25 0.375 0.724162655453 0.00012667379578 0.00625556901699
dro 550 25 0.375 0.742888835158 0.000111600065516 0.00837001101853
dro 600 25 0.375 0.760202413036 0.000117785707285 0.00756661943795
dro 700 25 0.375 0.791217743997 9.07338505754e-05 0.00949634076204
dro 800 25 0.375 0.817471872514 7.01472156598e-05 0.0113317275466
dro 900 25 0.375 0.839724656339 6.28644629321e-05 0.0111908259148
dro 1000 25 0.375 0.858580516746 4.36044453547e-05 0.0111215872749
dro 400 25 0.5 0.62136418308 0.000221129795353 0.00493911327966
dro 500 25 0.5 0.658238583009 0.000164099135654 0.00271208982369
dro 550 25 0.5 0.675051404631 0.000146363304889 0.000836305924898
dro 600 25 0.5 0.691640917698 0.000157242576464 0.00235483234623
dro 700 25 0.5 0.722696044356 0.000128003736 0.00365549310232
dro 800 25 0.5 0.750462631337 0.000105076920707 0.00678351217704
dro 900 25 0.5 0.775114822348 9.7679748488e-05 0.00895888395265
dro 1000 25 0.5 0.796907233509 6.93367300637e-05 0.0089446981881
dro 400 25 0.75 0.565317982945 0.000301503838963 0.00679803207086
dro 500 25 0.75 0.589719024416 0.000228113481677 0.00772258317427
dro 550 25 0.75 0.601194982717 0.000204204721457 0.00595538357383
dro 600 25 0.75 0.613600634796 0.000219879819428 0.00751108430556
dro 700 25 0.75 0.63800411124 0.000180782456137 0.00449001187703
dro 800 25 0.75 0.661718070471 0.000152708742626 0.00389618621821
dro 900 25 0.75 0.68398556957 0.000148476220911 0.00484707908495
dro 1000 25 0.75 0.704724676717 0.000111497036827 0.00138467062317
dro 400 25 1.0 0.539663614726 0.000342083858315 0.0057266268923
dro 500 25 1.0 0.55808683537 0.000283257734475 0.00677218872352
dro 550 25 1.0 0.566410110895 0.00026135531327 0.00507372696211
dro 600 25 1.0 0.57566089268 0.000282981927504 0.00793841642827
dro 700 25 1.0 0.593097297776 0.000230415381796 0.00683283651582
dro 800 25 1.0 0.6117245807 0.000194124414728 0.00707217170033
dro 900 25 1.0 0.629639585214 0.000188581186382 0.00927665820304
dro 1000 25 1.0 0.647055390833 0.000142106238037 0.00497649654733
dro 400 25 1.5 0.51636366504 0.000448134531008 0.00320140223925
dro 500 25 1.5 0.527541618507 0.000360342008323 0.00494113651304
dro 550 25 1.5 0.532699849763 0.000331743411814 0.00322775153758
dro 600 25 1.5 0.539056387013 0.000357959004464 0.00595583230853
dro 700 25 1.5 0.5508805737 0.000313172134945 0.00480703334133
dro 800 25 1.5 0.563886821755 0.000279077176181 0.00411517556364
dro 900 25 1.5 0.57512350839 0.000272437284923 0.00949888945064
dro 1000 25 1.5 0.585845580759 0.000203102424909 0.00609302063695
dro 400 25 2.0 0.504698244618 0.000493881392947 0.00198663538206
dro 500 25 2.0 0.513656695117 0.00044094790975 0.00285522090997
dro 550 25 2.0 0.517078191194 0.000403543840206 0.00168222065351
dro 600 25 2.0 0.521868510675 0.000438315825843 0.0039052368077
dro 700 25 2.0 0.529746218785 0.000382074701696 0.00323940017223
dro 800 25 2.0 0.539576167681 0.000322798336939 0.00407240572448
dro 900 25 2.0 0.548415119867 0.000326778927092 0.00788806894286
dro 1000 25 2.0 0.556979086926 0.000258875182896 0.00384307632418
dro 400 25 2.5 0.49770016364 0.000573777667744 0.00359799925438
dro 500 25 2.5 0.504425027866 0.000464533602246 0.00249225805139
dro 550 25 2.5 0.507948578578 0.000448068826904 0.00122316327925
dro 600 25 2.5 0.512125181058 0.00051778901765 0.00254838281333
dro 700 25 2.5 0.517956763024 0.000441757472605 0.00154845232834
dro 800 25 2.5 0.525739109241 0.000383187680936 0.00248170816568
dro 900 25 2.5 0.532358322002 0.000383471580136 0.00623818570948
dro 1000 25 2.5 0.538216677446 0.000289563678863 0.00274967857655
dro 400 25 3.0 0.493078215253 0.000617278724492 0.000190880413073
dro 500 25 3.0 0.499088426229 0.000541701544938 0.00328572254051
dro 550 25 3.0 0.501491650424 0.000516621487036 0.0014451656361
dro 600 25 3.0 0.504585507521 0.000535699814908 0.00168499593811
dro 700 25 3.0 0.510489012844 0.000498397529218 0.00112073515562
dro 800 25 3.0 0.516847702621 0.00044090048414 0.000803179883836
dro 900 25 3.0 0.521847140107 0.000428756515608 0.00473228818953
dro 1000 25 3.0 0.526905950422 0.000337821298818 0.00184988021045
dro 400 25 4.0 0.486280326004 0.000698602463443 0.00169265023104
dro 500 25 4.0 0.491250323696 0.000607745354004 0.00184773661343
dro 550 25 4.0 0.493187611632 0.000572405354215 0.00379113574971
dro 600 25 4.0 0.495777009618 0.000642087678599 0.00352095073061
dro 700 25 4.0 0.499585751127 0.000596024072124 0.00246043806192
dro 800 25 4.0 0.504865785816 0.000489312092004 0.00324345122576
dro 900 25 4.0 0.508932789968 0.000514801260816 0.00411839272375
dro 1000 25 4.0 0.512737470573 0.000417562924711 0.00288807163885
dro 400 25 5.0 0.481432800209 0.000773502757924 0.00400882818414
dro 500 25 5.0 0.485734782897 0.000662900276139 0.00330806119089
dro 550 25 5.0 0.487714434788 0.000638190370209 0.00627881134445
dro 600 25 5.0 0.4895066004 0.000717006198135 0.00772781529317
dro 700 25 5.0 0.492731835814 0.000632613499962 0.00500397016841
dro 800 25 5.0 0.497288680267 0.000570583734573 0.00642861850439
dro 900 25 5.0 0.500585102345 0.000598744077775 0.00489108591808
dro 1000 25 5.0 0.502451970108 0.000438440055541 0.0048372306714
dro 400 30 0.266 0.739993382762 0.000148546486958 0.0130760745005
dro 500 30 0.266 0.779128569429 0.000104769906352 0.0126808199235
dro 550 30 0.266 0.795867716218 8.97999435381e-05 0.0145182313078
dro 600 30 0.266 0.81080619864 9.22830886586e-05 0.0126976983543
dro 700 30 0.266 0.837251948522 6.8243398839e-05 0.012793786218
dro 800 30 0.266 0.859185746484 5.19396389497e-05 0.0134762973211
dro 900 30 0.266 0.877291700994 4.62176941069e-05 0.0120191405445
dro 1000 30 0.266 0.892537095932 3.17403764204e-05 0.0112338813242
dro 400 30 0.375 0.651010370345 0.000217185122283 0.00109916314843
dro 500 30 0.375 0.690189999011 0.000156555875734 0.00412397250871
dro 550 30 0.375 0.707962174437 0.000137314620071 0.00605058513726
dro 600 30 0.375 0.72450224849 0.000145290620137 0.00541845326336
dro 700 30 0.375 0.754962702432 0.000114549117833 0.00774004512431
dro 800 30 0.375 0.781723585419 9.05912911901e-05 0.0103696200379
dro 900 30 0.375 0.804901073786 8.19675371185e-05 0.0108289833704
dro 1000 30 0.375 0.825221337176 5.71222975488e-05 0.0109944199428
dro 400 30 0.5 0.596961868112 0.0002708190371 0.004712131553
dro 500 30 0.5 0.628529414837 0.000201401002252 0.00475014002761
dro 550 30 0.5 0.643954553816 0.000178947422057 0.00264876157856
dro 600 30 0.5 0.658635586678 0.000191414998819 0.00196279373701
dro 700 30 0.5 0.686963688798 0.000154649513112 0.000818474929463
dro 800 30 0.5 0.713244715153 0.000127425386817 0.00411984325626
dro 900 30 0.5 0.737050231847 0.000120874316817 0.00700916775752
dro 1000 30 0.5 0.758805622732 8.75902155963e-05 0.00683820875917
dro 400 30 0.75 0.549665048941 0.000359748980719 0.00526446357779
dro 500 30 0.75 0.569610126651 0.000271667367678 0.00735013681273
dro 550 30 0.75 0.579600157915 0.000243687190873 0.00559679560943
dro 600 30 0.75 0.589849468437 0.000263208637618 0.00684167631175
dro 700 30 0.75 0.610604784779 0.000217227580182 0.00579227724315
dro 800 30 0.75 0.631047234953 0.000182979665179 0.00517488975099
dro 900 30 0.75 0.650606998956 0.000176942832967 0.00734889895765
dro 1000 30 0.75 0.669473533047 0.000132266128057 0.00313556640863
dro 400 30 1.0 0.528468398488 0.000398192969872 0.00410378100059
dro 500 30 1.0 0.543545004473 0.000335773392611 0.00572742730501
dro 550 30 1.0 0.550575044927 0.000309017836424 0.00447245933089
dro 600 30 1.0 0.557879109765 0.00033371741274 0.00652501633301
dro 700 30 1.0 0.572447739238 0.000272368445966 0.00673707360416
dro 800 30 1.0 0.587948053772 0.000230480838188 0.00554548413779
dro 900 30 1.0 0.603121123871 0.00022451274788 0.0101989535778
dro 1000 30 1.0 0.618122975807 0.000169232180558 0.00550915163833
dro 400 30 1.5 0.508977492011 0.000508172732286 0.00213516894345
dro 500 30 1.5 0.518492812079 0.00041668443588 0.00354952153423
dro 550 30 1.5 0.522961081236 0.000385662649439 0.00237755297161
dro 600 30 1.5 0.52775252968 0.000412066480655 0.00455825813117
dro 700 30 1.5 0.537500488689 0.00036700484808 0.00421109394328
dro 800 30 1.5 0.548100621683 0.000328695567478 0.00394777203929
dro 900 30 1.5 0.556980403471 0.000319460790597 0.00950041811749
dro 1000 30 1.5 0.565948279441 0.000238069473499 0.00572181302525
dro 400 30 2.0 0.49972041949 0.000558528853355 0.00118763845663
dro 500 30 2.0 0.506987765488 0.000496775391864 0.00214054919918
dro 550 30 2.0 0.509955875 0.000453702376924 0.000494731574761
dro 600 30 2.0 0.513566133256 0.000497044910405 0.00285994187262
dro 700 30 2.0 0.520177763613 0.000443077437694 0.00252759416438
dro 800 30 2.0 0.527922979081 0.00037020705042 0.00322408756941
dro 900 30 2.0 0.535298564309 0.000379700580085 0.00678956352629
dro 1000 30 2.0 0.54242506365 0.000304191791254 0.0030352061101
dro 400 30 2.5 0.493738797851 0.000642330200052 0.00205887281264
dro 500 30 2.5 0.499512306669 0.000521983239526 0.00118033272918
dro 550 30 2.5 0.50225721188 0.000504377809426 0.000969801521475
dro 600 30 2.5 0.505330639105 0.000583091377434 0.00287670176734
dro 700 30 2.5 0.510206350488 0.00049636921463 0.00105418536549
dro 800 30 2.5 0.516797795064 0.000437095678041 0.00149788954941
dro 900 30 2.5 0.521638703985 0.000445480146574 0.00611899546111
dro 1000 30 2.5 0.526930325456 0.000331249315503 0.00311719970306
dro 400 30 3.0 0.489352432316 0.000691487497959 0.000795373162226
dro 500 30 3.0 0.494952221023 0.000602895467181 0.00121932628224
dro 550 30 3.0 0.496692076557 0.000577905512758 0.00128629754715
dro 600 30 3.0 0.499197715877 0.000601135790934 0.00278885887555
dro 700 30 3.0 0.503924000228 0.000560364862336 0.00172017424591
dro 800 30 3.0 0.509251279592 0.000493790028919 0.00146839076167
dro 900 30 3.0 0.513348276746 0.000484846728139 0.00378435698968
dro 1000 30 3.0 0.517539992589 0.000387403273115 0.000400806998843
dro 400 30 4.0 0.48419995385 0.000777411679645 0.00369213871942
dro 500 30 4.0 0.488415261192 0.00067298784124 0.0038732520352
dro 550 30 4.0 0.489681724375 0.000635443782936 0.00363730920528
dro 600 30 4.0 0.491607867714 0.000715918760797 0.00171309377046
dro 700 30 4.0 0.49482990289 0.000662357111002 0.00259869842111
dro 800 30 4.0 0.498928148614 0.000547316371995 0.00337784341537
dro 900 30 4.0 0.502420627103 0.000578838969816 0.00481267024501
dro 1000 30 4.0 0.505524420507 0.000466614206201 0.00280599201515
dro 400 30 5.0 0.479494071949 0.000857420910749 0.00580662969184
dro 500 30 5.0 0.483324888663 0.000734012873538 0.00433461848018
dro 550 30 5.0 0.484567307043 0.000704909498487 0.00589977734417
dro 600 30 5.0 0.48655389961 0.000790998830286 0.00467459689556
dro 700 30 5.0 0.488630949618 0.000702030003941 0.00516353428946
dro 800 30 5.0 0.492495499043 0.000633320147477 0.00604449225647
dro 900 30 5.0 0.495231855467 0.000668182872089 0.00742705883442
dro 1000 30 5.0 0.497164201133 0.000489386838722 0.00554876980375
dro 400 40 0.266 0.693643625148 0.000221085734236 0.0136598238476
dro 500 40 0.266 0.729741154753 0.000152497039287 0.013368227333
dro 550 40 0.266 0.746289398011 0.00013157454413 0.0145172091995
dro 600 40 0.266 0.760955470408 0.000137044414252 0.0148524622442
dro 700 40 0.266 0.787894159446 0.000104972316003 0.0143965140016
dro 800 40 0.266 0.811332899369 8.11593239695e-05 0.0150896525589
dro 900 40 0.266 0.831197953293 7.24343988348e-05 0.0123915930635
dro 1000 40 0.266 0.848812276724 5.00935721143e-05 0.0138687333693
dro 400 40 0.375 0.608917705937 0.000317888074496 0.00187041401713
dro 500 40 0.375 0.641436688784 0.000226722805091 0.000945626749589
dro 550 40 0.375 0.65699143805 0.000197550954567 0.00278405876374
dro 600 40 0.375 0.67136553456 0.000207580240712 0.00352184476907
dro 700 40 0.375 0.699108517308 0.000162533427821 0.0049581457806
dro 800 40 0.375 0.724725804779 0.000130484878412 0.00764751088544
dro 900 40 0.375 0.747453685395 0.000121381790547 0.00846545529009
dro 1000 40 0.375 0.768609228338 8.67451655071e-05 0.00989072751085
dro 400 40 0.5 0.565345619211 0.000376064670647 0.0042639769686
dro 500 40 0.5 0.589438857618 0.000282058043387 0.00470638020301
dro 550 40 0.5 0.601641149113 0.000250985551584 0.00367220956002
dro 600 40 0.5 0.613241540731 0.000268399691775 0.00351930491489
dro 700 40 0.5 0.636502291011 0.000215689418766 0.00237846005811
dro 800 40 0.5 0.658828846563 0.000176317400254 0.00225351988444
dro 900 40 0.5 0.679722678045 0.000166615135486 0.00274685585358
dro 1000 40 0.5 0.699833345936 0.000121734918186 0.00299247571124
dro 400 40 0.75 0.530094917997 0.000467315399247 0.00364534585561
dro 500 40 0.75 0.544442291598 0.000355298385122 0.00492518400734
dro 550 40 0.75 0.552131121604 0.00032131934315 0.00472157339816
dro 600 40 0.75 0.559763913007 0.000349757247364 0.00582032889164
dro 700 40 0.75 0.575014814155 0.000292853787432 0.00565392579655
dro 800 40 0.75 0.59073478133 0.000247920980241 0.00579371567754
dro 900 40 0.75 0.605814296249 0.000240250715176 0.00843237522345
dro 1000 40 0.75 0.620891369754 0.000179182463702 0.00528296024558
dro 400 40 1.0 0.514606125786 0.000504929397887 0.00253738234806
dro 500 40 1.0 0.525436960653 0.000428298845419 0.00327949051376
dro 550 40 1.0 0.530982109034 0.000391137632155 0.00262781608984
dro 600 40 1.0 0.535910993941 0.000423171083028 0.0036033350235
dro 700 40 1.0 0.546760103226 0.000351390007723 0.00458529083131
dro 800 40 1.0 0.558127707555 0.000301638876328 0.0055502812313
dro 900 40 1.0 0.569298475279 0.000297356294128 0.00888891627353
dro 1000 40 1.0 0.580740781687 0.000225809855808 0.00553636846922
dro 400 40 1.5 0.500455666838 0.000622112255932 0.00136918267938
dro 500 40 1.5 0.50735698384 0.000517332752396 0.00132207176443
dro 550 40 1.5 0.510433825016 0.000484019576453 0.00165494120222
dro 600 40 1.5 0.514022683278 0.000507325441742 0.00357879640589
dro 700 40 1.5 0.52106210185 0.000460199115443 0.00242188095186
dro 800 40 1.5 0.528552193787 0.000410119530013 0.00254554714845
dro 900 40 1.5 0.535028186196 0.000399193553322 0.00679510000939
dro 1000 40 1.5 0.541647096111 0.000301079263751 0.00371993566349
dro 400 40 2.0 0.493402025233 0.000682939815119 0.00425666472461
dro 500 40 2.0 0.498736118766 0.000593416004171 0.000570780583465
dro 550 40 2.0 0.500995287196 0.000545450621953 0.00190063343219
dro 600 40 2.0 0.503329760123 0.000603169239579 0.00124191974235
dro 700 40 2.0 0.50837231657 0.000549235858097 0.000813544996426
dro 800 40 2.0 0.513689285686 0.000451547564365 0.00358644073212
dro 900 40 2.0 0.519231338227 0.000470524513956 0.00436589589587
dro 1000 40 2.0 0.524402772368 0.00037910881997 0.00135196002163
dro 400 40 2.5 0.488669229476 0.000770885081696 0.000814540272129
dro 500 40 2.5 0.492897333529 0.000628657801563 0.00133223030917
dro 550 40 2.5 0.494782687328 0.000605019091823 0.000627080812977
dro 600 40 2.5 0.49735171001 0.000690976773559 0.00131360464674
dro 700 40 2.5 0.500978369245 0.000593877034482 0.000645620676245
dro 800 40 2.5 0.505246431167 0.000530406364594 0.000326792466683
dro 900 40 2.5 0.5094426897 0.000551607147041 0.00324247719608
dro 1000 40 2.5 0.512756168289 0.00040196500728 0.000489222397609
dro 400 40 3.0 0.485549685584 0.000829931566873 0.00217672706763
dro 500 40 3.0 0.489439222436 0.000709095556898 0.00211337043058
dro 550 40 3.0 0.491138460064 0.000677181362506 0.00236990556149
dro 600 40 3.0 0.492724117922 0.000717964881757 0.00214574443914
dro 700 40 3.0 0.49601011224 0.000662488221762 0.0010490772907
dro 800 40 3.0 0.499840315442 0.000584666350269 0.00191943495045
dro 900 40 3.0 0.502728234477 0.000583219448176 0.00557380933796
dro 1000 40 3.0 0.506155577988 0.000470979729753 0.001460360616
dro 400 40 4.0 0.480313372529 0.00093027310968 0.00323434658353
dro 500 40 4.0 0.484084846971 0.000793510159932 0.0034706844464
dro 550 40 4.0 0.485407314234 0.000746050921322 0.00364403293755
dro 600 40 4.0 0.486398976721 0.000840999539717 0.00254640746434
dro 700 40 4.0 0.489091870281 0.000766390889962 0.00298540264002
dro 800 40 4.0 0.492167531862 0.000647524977761 0.0043233223196
dro 900 40 4.0 0.494687833472 0.000684415966204 0.00349354986431
dro 1000 40 4.0 0.496790190585 0.00054605536061 0.00369704287357
dro 400 40 5.0 0.47704987612 0.00101516329424 0.00664784794975
dro 500 40 5.0 0.48072779354 0.000862075513082 0.00702807267441
dro 550 40 5.0 0.481673236938 0.000819829965612 0.00680679974222
dro 600 40 5.0 0.482746920548 0.00092082807687 0.00646661027491
dro 700 40 5.0 0.484522059011 0.000817747388381 0.0057426608541
dro 800 40 5.0 0.487208114464 0.000736009931357 0.00732358586964
dro 900 40 5.0 0.488804277994 0.000774360371421 0.00791195870563
dro 1000 40 5.0 0.49034062722 0.000577368952652 0.0059703369598
dro 400 50 0.266 0.660953759235 0.000309579264807 0.0135329533321
dro 500 50 0.266 0.694188893172 0.00020987259108 0.0140590037423
dro 550 50 0.266 0.709390184605 0.000180022798887 0.0139914765744
dro 600 50 0.266 0.723342090701 0.000186413790127 0.0154654338006
dro 700 50 0.266 0.749348901858 0.000142902821736 0.0149157538462
dro 800 50 0.266 0.77264628584 0.000112597987581 0.0155317948946
dro 900 50 0.266 0.792928735844 0.000102398070859 0.0123560786669
dro 1000 50 0.266 0.811249254129 7.14713514029e-05 0.0154609646495
dro 400 50 0.375 0.581913648466 0.000428898644258 0.0045402378467
dro 500 50 0.375 0.608985718307 0.000305539565627 0.00189428195789
dro 550 50 0.375 0.622175314352 0.000266358556302 0.00112265095177
dro 600 50 0.375 0.634997602074 0.000279342156589 0.0023795268973
dro 700 50 0.375 0.659479642975 0.000217951432092 0.00287828997807
dro 800 50 0.375 0.68283815642 0.000174253887611 0.00500401441863
dro 900 50 0.375 0.7041617571 0.000161657064393 0.00491923682106
dro 1000 50 0.375 0.724356530693 0.000116331953475 0.00811797821479
dro 400 50 0.5 0.546156234201 0.000487147461336 0.00519440751868
dro 500 50 0.5 0.565287757296 0.000364920893352 0.00405091575854
dro 550 50 0.5 0.575103918 0.000325422914734 0.00460023333509
dro 600 50 0.5 0.584498163135 0.00034858751593 0.0047858725218
dro 700 50 0.5 0.603643948315 0.000281452150511 0.00458150913203
dro 800 50 0.5 0.622495359653 0.000230589015618 0.00431621011518
dro 900 50 0.5 0.640364735175 0.000217981795133 0.00417055786727
dro 1000 50 0.5 0.658180043237 0.000159016641628 0.00330566702867
dro 400 50 0.75 0.518304430991 0.000572930713214 0.00420065426898
dro 500 50 0.75 0.52972436353 0.000436708468563 0.00356458747083
dro 550 50 0.75 0.535692847961 0.000396361051841 0.00411621800587
dro 600 50 0.75 0.541570366534 0.000433003741376 0.00515229553579
dro 700 50 0.75 0.553879565192 0.000364726810819 0.00532057072139
dro 800 50 0.75 0.566302027281 0.000310782870487 0.00636989912749
dro 900 50 0.75 0.577962204827 0.00030343743216 0.00774236516518
dro 1000 50 0.75 0.590141101001 0.000227529109555 0.00673282700416
dro 400 50 1.0 0.506207270949 0.000614143135944 0.00359161343335
dro 500 50 1.0 0.514864231273 0.000511133184178 0.00261880368184
dro 550 50 1.0 0.51913019976 0.000464694452621 0.00342631928699
dro 600 50 1.0 0.522882329503 0.000505190361637 0.00348145340788
dro 700 50 1.0 0.531447834148 0.000424619032352 0.00449784355652
dro 800 50 1.0 0.540379743459 0.000367281531598 0.00401856507021
dro 900 50 1.0 0.549144605382 0.000364912136316 0.00675749909959
dro 1000 50 1.0 0.55789311765 0.000279109039223 0.00522101291316
dro 400 50 1.5 0.494494186221 0.000739558154251 0.0012690255832
dro 500 50 1.5 0.500488527581 0.000609112382652 0.000206153881777
dro 550 50 1.5 0.503052390629 0.000571873292335 0.00153594989829
dro 600 50 1.5 0.505803103924 0.000595289819685 0.00464893996746
dro 700 50 1.5 0.511329112915 0.000540637903696 0.00100802103888
dro 800 50 1.5 0.517401054688 0.000476386329684 0.00359453962416
dro 900 50 1.5 0.522184673788 0.000467909973878 0.00470620227268
dro 1000 50 1.5 0.52763055034 0.000356855166795 0.00429809890527
dro 400 50 2.0 0.488930358882 0.000814486312707 0.0025915718699
dro 500 50 2.0 0.493086949926 0.000686605771964 7.10687509667e-05
dro 550 50 2.0 0.495676835649 0.000632171410783 0.000830255817214
dro 600 50 2.0 0.497555079023 0.000700802776125 0.00179228617787
dro 700 50 2.0 0.501326286349 0.000637905507501 0.0012200358899
dro 800 50 2.0 0.505338964269 0.000523570750576 0.00225787452801
dro 900 50 2.0 0.509596485664 0.000548567813108 0.00311108475431
dro 1000 50 2.0 0.513831008687 0.000438838256938 0.00370362168949
dro 400 50 2.5 0.485483103325 0.000902839667211 0.00326649931014
dro 500 50 2.5 0.48914588797 0.000732235902754 0.0017151959105
dro 550 50 2.5 0.490962325095 0.000696939806702 0.00148551720366
dro 600 50 2.5 0.49251671353 0.000788809700644 0.00260347812182
dro 700 50 2.5 0.495308224439 0.000683075978556 0.00230244966462
dro 800 50 2.5 0.498703739204 0.000610190074717 0.00221609769367
dro 900 50 2.5 0.501961527701 0.000639936060195 0.00373954019268
dro 1000 50 2.5 0.505002826493 0.000462963818176 0.00171577777058
dro 400 50 3.0 0.482982506015 0.00097026770144 0.00488478210276
dro 500 50 3.0 0.486066394742 0.000811036505445 0.00257026160008
dro 550 50 3.0 0.487425937847 0.000769569603875 0.00162173314286
dro 600 50 3.0 0.489047753909 0.000827125960399 0.00372363317564
dro 700 50 3.0 0.491522571865 0.000751882649245 0.00229006203006
dro 800 50 3.0 0.49441681775 0.000665037207444 0.00238768662416
dro 900 50 3.0 0.496943556671 0.000668644451306 0.0030159086735
dro 1000 50 3.0 0.499454311613 0.000539302842507 0.00410388368536
dro 400 50 4.0 0.479231634346 0.001081819632 0.00633036290539
dro 500 50 4.0 0.481991023149 0.000906621623325 0.00460281454017
dro 550 50 4.0 0.483144781271 0.000848940181528 0.00452078640858
dro 600 50 4.0 0.483785001067 0.00095511759796 0.00439512201583
dro 700 50 4.0 0.485931089382 0.000858502174244 0.00377504673397
dro 800 50 4.0 0.488100150435 0.000738570231882 0.00461268294459
dro 900 50 4.0 0.489934069834 0.000774915878357 0.00421506227194
dro 1000 50 4.0 0.492059529987 0.000613586703479 0.00503000300571
dro 400 50 5.0 0.476031599498 0.00117219048105 0.00813276055058
dro 500 50 5.0 0.478716351949 0.000981277027719 0.00758565117555
dro 550 50 5.0 0.479394134963 0.000928987200721 0.00625274696637
dro 600 50 5.0 0.48045485254 0.00104148651393 0.00764736888792
dro 700 50 5.0 0.482094175314 0.000920733910372 0.00720794761342
dro 800 50 5.0 0.483449373874 0.000827294592876 0.00625203000896
dro 900 50 5.0 0.485080075388 0.00086325400815 0.00577438350933
dro 1000 50 5.0 0.487017098096 0.000653728128406 0.00801900111583
dro 400 60 0.266 0.636449140343 0.000412211179024 0.0126225565764
dro 500 60 0.266 0.667242177092 0.000276530563134 0.0134544348644
dro 550 60 0.266 0.681308768901 0.00023649434598 0.0130967897974
dro 600 60 0.266 0.694494440609 0.00024391824707 0.0156189270879
dro 700 60 0.266 0.719013234693 0.000185939415748 0.014979395406
dro 800 60 0.266 0.741567566383 0.000145967730815 0.0154264368939
dro 900 60 0.266 0.761501158307 0.000133264653791 0.0132943706837
dro 1000 60 0.266 0.779871206489 9.43774104423e-05 0.0164438862705
dro 400 60 0.375 0.563017293765 0.000548528008352 0.00504384100104
dro 500 60 0.375 0.586546913244 0.000388933261029 0.00395494402612
dro 550 60 0.375 0.597939114855 0.000339649152501 0.00278238860182
dro 600 60 0.375 0.608682720423 0.000357125903573 0.00291125419059
dro 700 60 0.375 0.630538650292 0.000279026229127 0.00139642548867
dro 800 60 0.375 0.651596227436 0.00022328590004 0.00276098089264
dro 900 60 0.375 0.671130936967 0.000206959198155 0.00287630798837
dro 1000 60 0.375 0.689996145301 0.000148692149758 0.00649805632529
dro 400 60 0.5 0.533088336011 0.000604695917954 0.00371205054263
dro 500 60 0.5 0.549226020089 0.000448573476187 0.00385337788328
dro 550 60 0.5 0.557584854358 0.000399888028973 0.00411923691926
dro 600 60 0.5 0.565201032994 0.000428888296364 0.00534493843601
dro 700 60 0.5 0.581131904069 0.000347963352577 0.00532523051632
dro 800 60 0.5 0.597246038186 0.000286483464672 0.00460333275316
dro 900 60 0.5 0.612710138097 0.000271854715542 0.00471085315602
dro 1000 60 0.5 0.628292745665 0.000199087224179 0.00524734375257
dro 400 60 0.75 0.510543290098 0.000684372155994 0.00365254563227
dro 500 60 0.75 0.520137613781 0.000518327999782 0.00369616335902
dro 550 60 0.75 0.525267744824 0.00046974066777 0.00225511981796
dro 600 60 0.75 0.530025252927 0.000512838771895 0.00467667769104
dro 700 60 0.75 0.539673423702 0.000432769237893 0.00444016330057
dro 800 60 0.75 0.5497015099 0.000370175349341 0.00430113746129
dro 900 60 0.75 0.559709294356 0.000362945054654 0.00646439924541
dro 1000 60 0.75 0.569689529945 0.000273665760117 0.00623683822652
dro 400 60 1.0 0.500208329606 0.000730388769587 0.00505313641134
dro 500 60 1.0 0.507793628586 0.000591716251495 0.00349905822087
dro 550 60 1.0 0.511422049251 0.000536511599241 0.00124865750507
dro 600 60 1.0 0.51472510071 0.000584135630391 0.00463270748948
dro 700 60 1.0 0.521456013235 0.000493474857521 0.00237777773584
dro 800 60 1.0 0.52895674899 0.000427759834411 0.00444680638553
dro 900 60 1.0 0.536068468383 0.000426549891043 0.00461216587345
dro 1000 60 1.0 0.543208209274 0.000327371994808 0.00474825174159
dro 400 60 1.5 0.49112612606 0.000863085196576 0.00285751814684
dro 500 60 1.5 0.495770594413 0.000697683428872 0.00207092839511
dro 550 60 1.5 0.498246702471 0.000652892754379 0.00132792068821
dro 600 60 1.5 0.500356033322 0.000681395272292 0.00198070509525
dro 700 60 1.5 0.50484921884 0.000614367822597 0.00236737978425
dro 800 60 1.5 0.509746986895 0.000536953151482 0.00226507393159
dro 900 60 1.5 0.513730668301 0.000530956934725 0.00366624562429
dro 1000 60 1.5 0.51842696208 0.000407496873797 0.00323288891449
dro 400 60 2.0 0.486512723513 0.000951680391917 0.00244419284614
dro 500 60 2.0 0.490124451809 0.000779837892987 0.0017655028236
dro 550 60 2.0 0.491710775287 0.000718668390316 0.00198570020713
dro 600 60 2.0 0.493712550414 0.000793768328388 0.00328072027689
dro 700 60 2.0 0.496523425491 0.000716827219315 0.00054018148256
dro 800 60 2.0 0.500319323069 0.000590256070177 0.00193757628217
dro 900 60 2.0 0.5035991841 0.000618234761356 0.00187831909425
dro 1000 60 2.0 0.507054913729 0.000490299057882 0.00140000936599
dro 400 60 2.5 0.482888178104 0.00104680332065 0.00241424370921
dro 500 60 2.5 0.486796145714 0.000836651005352 0.00300804931869
dro 550 60 2.5 0.488027907525 0.000788913283388 0.00235272020916
dro 600 60 2.5 0.489646148175 0.00088407554947 0.00368127777259
dro 700 60 2.5 0.491998641645 0.00076581010809 0.00205194830347
dro 800 60 2.5 0.494954706086 0.000680824645879 0.00294642459985
dro 900 60 2.5 0.497197738601 0.000713798074118 0.00335927508271
dro 1000 60 2.5 0.499728788535 0.000519229698199 0.00210695711053
dro 400 60 3.0 0.481040573729 0.00112186892371 0.00390821993187
dro 500 60 3.0 0.48368942835 0.000916236778414 0.00263091204964
dro 550 60 3.0 0.485062873501 0.000861162963762 0.00165024650048
dro 600 60 3.0 0.486521775242 0.00093282678288 0.00449469132544
dro 700 60 3.0 0.488593666901 0.000836436471226 0.00345006048639
dro 800 60 3.0 0.490726677216 0.00073952143926 0.00229514142525
dro 900 60 3.0 0.49263162655 0.000746423424587 0.00122868559128
dro 1000 60 3.0 0.495026173895 0.000598354793084 0.00331418894218
dro 400 60 4.0 0.477236083859 0.00124190875962 0.00440744771731
dro 500 60 4.0 0.480216876245 0.00102090148877 0.00483212156854
dro 550 60 4.0 0.481272872289 0.000953249464216 0.00443981406532
dro 600 60 4.0 0.482005393712 0.00106469673377 0.00597663915362
dro 700 60 4.0 0.483892399154 0.000946438105248 0.00516893962091
dro 800 60 4.0 0.485534656519 0.000823199494358 0.00514444970473
dro 900 60 4.0 0.486911081638 0.000856231805488 0.00736276562857
dro 1000 60 4.0 0.488674712681 0.000675311748882 0.00523791834901
dro 400 60 5.0 0.474369665755 0.00134302292047 0.00722295439861
dro 500 60 5.0 0.477092475397 0.00110342226299 0.0075083855902
dro 550 60 5.0 0.478044346515 0.00103412961134 0.00660776469515
dro 600 60 5.0 0.478611532438 0.00115659999222 0.00827711445556
dro 700 60 5.0 0.47991509819 0.0010195098037 0.00664972196731
dro 800 60 5.0 0.481742199709 0.00091137116148 0.00662473204201
dro 900 60 5.0 0.483046105581 0.000944401499246 0.00586770985048
dro 1000 60 5.0 0.484127704716 0.000725081358592 0.00786872611406
dro 400 70 0.266 0.61771318868 0.000526460571353 0.0119013455048
dro 500 70 0.266 0.646119827204 0.000351235392204 0.0128160802303
dro 550 70 0.266 0.659367217693 0.000299780061311 0.0127352225363
dro 600 70 0.266 0.671788570676 0.000308504019261 0.01515948392
dro 700 70 0.266 0.694978733473 0.000234297649262 0.0148056968837
dro 800 70 0.266 0.716414309581 0.000183261580028 0.0149829033941
dro 900 70 0.266 0.735656390706 0.000166794028464 0.013735904498
dro 1000 70 0.266 0.753612014082 0.000118209083963 0.0168370594778
dro 400 70 0.375 0.549192705423 0.000676390660757 0.00375901163044
dro 500 70 0.375 0.569477042179 0.00047755101531 0.00406432811257
dro 550 70 0.375 0.57988160318 0.000416727341993 0.00329613718374
dro 600 70 0.375 0.589860231092 0.000437645669633 0.00506564407871
dro 700 70 0.375 0.608746859632 0.000343517025567 0.00246667189015
dro 800 70 0.375 0.627831685324 0.000275631063596 0.00126875850993
dro 900 70 0.375 0.645719213016 0.000255906228289 0.000866375294947
dro 1000 70 0.375 0.663007015285 0.000184060165491 0.00478270981944
dro 400 70 0.5 0.523977639783 0.000728554359673 0.00306822237469
dro 500 70 0.5 0.537824510122 0.000534476620503 0.00400881794571
dro 550 70 0.5 0.544994574114 0.000475488946489 0.00392443757598
dro 600 70 0.5 0.551487005557 0.000509317146587 0.00705052301683
dro 700 70 0.5 0.565389541264 0.000413803332582 0.00533871374517
dro 800 70 0.5 0.579096011027 0.000342339762513 0.00593622218753
dro 900 70 0.5 0.592311439482 0.000326269293849 0.00508055450831
dro 1000 70 0.5 0.606028266069 0.000240040392315 0.00606299017355
dro 400 70 0.75 0.504548758073 0.000806004344052 0.00327763911511
dro 500 70 0.75 0.51328966967 0.000602814295012 0.00266674112646
dro 550 70 0.75 0.517363043426 0.000544679717433 0.00238469250399
dro 600 70 0.75 0.521588981956 0.000592099106277 0.00547941663013
dro 700 70 0.75 0.529846753478 0.000498363906822 0.00296592306884
dro 800 70 0.75 0.538281656715 0.000426521053233 0.00362346712912
dro 900 70 0.75 0.546952704227 0.00041873016139 0.00463996921472
dro 1000 70 0.75 0.5552745288 0.00031702741036 0.005861715793
dro 400 70 1.0 0.495650107871 0.000856505930524 0.00180218316314
dro 500 70 1.0 0.502901764162 0.000674001666239 0.00187002246872
dro 550 70 1.0 0.50587505145 0.00060957637248 0.0011450899416
dro 600 70 1.0 0.508755470546 0.00066288280955 0.00136008977267
dro 700 70 1.0 0.514513357512 0.000560198847388 0.00151605505338
dro 800 70 1.0 0.521050267329 0.000484679997097 0.00264776223158
dro 900 70 1.0 0.526665374337 0.000484013719883 0.00414748078075
dro 1000 70 1.0 0.532898032249 0.00037178969918 0.0054165394085
dro 400 70 1.5 0.48802756071 0.000994535751115 0.00330826414864
dro 500 70 1.5 0.492822716005 0.000786954296016 0.00212884572758
dro 550 70 1.5 0.494616305363 0.000732883030485 0.00264385300538
dro 600 70 1.5 0.496851419692 0.000767630957437 0.0032292583347
dro 700 70 1.5 0.500744757919 0.000684299932572 0.000861449988846
dro 800 70 1.5 0.504691700653 0.000594527614307 0.00199052300169
dro 900 70 1.5 0.508023768011 0.000590208435513 0.00201454582121
dro 1000 70 1.5 0.512106649715 0.000454556499141 0.00366235306745
dro 400 70 2.0 0.483909366394 0.00109956147654 0.00301567607151
dro 500 70 2.0 0.487792348548 0.000876965722147 0.0016583173949
dro 550 70 2.0 0.489488366889 0.000804039875813 0.00382450140922
dro 600 70 2.0 0.490769160131 0.000887298462284 0.00486232347712
dro 700 70 2.0 0.493874634655 0.000788990895843 0.00408545790622
dro 800 70 2.0 0.496726411628 0.000655808027953 0.00144504880442
dro 900 70 2.0 0.499285220304 0.000683644501818 0.00141889417139
dro 1000 70 2.0 0.50255331694 0.000537173853594 0.0034106531017
dro 400 70 2.5 0.481857709866 0.00119766039997 0.00440722356373
dro 500 70 2.5 0.484464709645 0.000945928766275 0.00233035166572
dro 550 70 2.5 0.485736000387 0.00088237257785 0.0012778264039
dro 600 70 2.5 0.486866538258 0.000982100931467 0.00256614024861
dro 700 70 2.5 0.489371728478 0.000846713983824 0.00216827959237
dro 800 70 2.5 0.49144374023 0.000750059263016 0.00132534587181
dro 900 70 2.5 0.49380079539 0.000780629919264 0.00161587688636
dro 1000 70 2.5 0.496092377517 0.000572233535878 0.00292483623094
dro 400 70 3.0 0.479404389427 0.00128131535727 0.00373973703789
dro 500 70 3.0 0.481940008966 0.00102534008281 0.00366600388282
dro 550 70 3.0 0.483639207086 0.000955009618611 0.00288163064309
dro 600 70 3.0 0.483926398974 0.00104281247191 0.00298234418732
dro 700 70 3.0 0.48652440961 0.00091935216016 0.00426216953656
dro 800 70 3.0 0.48842108352 0.000811268656384 0.00230127717368
dro 900 70 3.0 0.489992597221 0.000818626480782 0.00140717080145
dro 1000 70 3.0 0.492181818159 0.000651310561443 0.00412253284961
dro 400 70 4.0 0.476300811124 0.00141529483356 0.00560804255329
dro 500 70 4.0 0.478926994895 0.00113820237761 0.00523199934179
dro 550 70 4.0 0.479753809611 0.00105740905359 0.00410547974218
dro 600 70 4.0 0.48121317019 0.00117405665533 0.0071155114352
dro 700 70 4.0 0.481571234148 0.00103694992578 0.00441442835669
dro 800 70 4.0 0.483750837276 0.000904417809548 0.00454825638421
dro 900 70 4.0 0.485090929028 0.000933523774819 0.00513174195591
dro 1000 70 4.0 0.486553516228 0.000733799464923 0.00554993272973
dro 400 70 5.0 0.472953483924 0.00151954478461 0.00724780635117
dro 500 70 5.0 0.476139098343 0.00122372912487 0.00682073569239
dro 550 70 5.0 0.476796679929 0.00113908634273 0.0056860322791
dro 600 70 5.0 0.477105828533 0.00127192263923 0.00676284801914
dro 700 70 5.0 0.47846380581 0.00111580720903 0.00619823978508
dro 800 70 5.0 0.480299170892 0.00099383471514 0.00670933629678
dro 900 70 5.0 0.481161595088 0.00102231699706 0.00503328448143
dro 1000 70 5.0 0.482673947474 0.000790359330765 0.00828419086673
dro 400 80 0.266 0.602607530007 0.000652113670676 0.0110170270406
dro 500 80 0.266 0.629402406766 0.00043250617426 0.0115820329664
dro 550 80 0.266 0.641697290057 0.000369014579984 0.011818127557
dro 600 80 0.266 0.65344449631 0.00037935552151 0.0143059922756
dro 700 80 0.266 0.675372440692 0.000287537089442 0.0147322220113
dro 800 80 0.266 0.695586232902 0.000224541658791 0.0145028208858
dro 900 80 0.266 0.714102100159 0.000203840664259 0.0137138124228
dro 1000 80 0.266 0.731447832874 0.000144204685268 0.0168518305286
dro 400 80 0.375 0.538524641666 0.000812427830463 0.00505365310541
dro 500 80 0.375 0.557166438063 0.000569118444227 0.00475805917304
dro 550 80 0.375 0.566324662562 0.000496777363403 0.00413942482138
dro 600 80 0.375 0.574873522638 0.000522236945073 0.00551224979207
dro 700 80 0.375 0.591944759358 0.000410472109449 0.00305519787306
dro 800 80 0.375 0.609294686825 0.000330348324925 0.0026800319463
dro 900 80 0.375 0.625446522074 0.000307367186491 0.00030857591952
dro 1000 80 0.375 0.641500095649 0.00022156033414 0.00355628992478
dro 400 80 0.5 0.516948897585 0.000862422180931 0.00327913725939
dro 500 80 0.5 0.529018352254 0.000624516866393 0.00306033215206
dro 550 80 0.5 0.535155927532 0.000554032037508 0.0033834415022
dro 600 80 0.5 0.540895946442 0.000591825105423 0.00395389497231
dro 700 80 0.5 0.552884156356 0.000480740518006 0.0054560644674
dro 800 80 0.5 0.565466383566 0.000397780395184 0.00496114211215
dro 900 80 0.5 0.577260026141 0.000380101861195 0.00465893237054
dro 1000 80 0.5 0.589193991313 0.000280860722594 0.00638439339796
dro 400 80 0.75 0.499694910252 0.000938633303618 0.00295245142127
dro 500 80 0.75 0.507929937161 0.00069104987766 0.00342375186579
dro 550 80 0.75 0.511934062334 0.000621258528953 0.00207207218085
dro 600 80 0.75 0.515348347068 0.000672515013847 0.00449320738542
dro 700 80 0.75 0.522681340372 0.000563133678083 0.00281718319782
dro 800 80 0.75 0.530182489635 0.000480759736916 0.00341687699162
dro 900 80 0.75 0.537286122704 0.000472412425421 0.00426751690078
dro 1000 80 0.75 0.544657415956 0.000358316573864 0.00639056183192
dro 400 80 1.0 0.492654634739 0.000990457562056 0.000586647908797
dro 500 80 1.0 0.49868452683 0.000761716126141 0.0019419336192
dro 550 80 1.0 0.501540469251 0.000686118337098 0.00182416408201
dro 600 80 1.0 0.504421172768 0.000743345735891 0.00426368115893
dro 700 80 1.0 0.509423168594 0.000626089140976 0.00384587067508
dro 800 80 1.0 0.514852669294 0.000540644688753 0.00322565273739
dro 900 80 1.0 0.519943189598 0.000538533157643 0.003363110958
dro 1000 80 1.0 0.525177342187 0.000413803059832 0.00516291756455
dro 400 80 1.5 0.485197314803 0.00113592424002 0.000739206508797
dro 500 80 1.5 0.490125052749 0.000879924264549 0.00146672569339
dro 550 80 1.5 0.491704551772 0.000814311510591 0.00123770931181
dro 600 80 1.5 0.49374460533 0.000857733520791 0.00487141365844
dro 700 80 1.5 0.497349411326 0.000753756564673 0.0031761148958
dro 800 80 1.5 0.500469287662 0.000652977817336 0.00108300671745
dro 900 80 1.5 0.503805460605 0.000647761806968 0.00242942839459
dro 1000 80 1.5 0.507325162236 0.00049937183053 0.00212232177845
dro 400 80 2.0 0.481496629641 0.00125757229438 0.00190117270817
dro 500 80 2.0 0.485362053374 0.000981274513791 0.000859432957784
dro 550 80 2.0 0.487066464815 0.000895193562451 0.00101019471783
dro 600 80 2.0 0.488649187902 0.000980505458845 0.00702410519424
dro 700 80 2.0 0.490993632085 0.000862432147353 0.00406543749996
dro 800 80 2.0 0.493864948676 0.000720140877692 0.00140141053851
dro 900 80 2.0 0.496197581134 0.000746493161666 0.000638833276565
dro 1000 80 2.0 0.498856123205 0.000582718057586 0.00232837831529
dro 400 80 2.5 0.479445515463 0.0013656367294 0.00216290243656
dro 500 80 2.5 0.482823000384 0.00105779600622 0.00167402313596
dro 550 80 2.5 0.483974474586 0.000978415300095 0.00110868387393
dro 600 80 2.5 0.485698257048 0.00107851640318 0.00406725495905
dro 700 80 2.5 0.487381151828 0.000927823361472 0.00279504029954
dro 800 80 2.5 0.489413922197 0.000815648189115 0.00102861695575
dro 900 80 2.5 0.491059757299 0.000843944790479 0.00252640025235
dro 1000 80 2.5 0.493221442189 0.000624093413864 0.00263354039622
dro 400 80 3.0 0.4781623868 0.00145014009301 0.00535491659132
dro 500 80 3.0 0.480902491708 0.00113825142831 0.00341520701083
dro 550 80 3.0 0.481940005809 0.00105529307677 0.00220658186491
dro 600 80 3.0 0.483076026144 0.00115123423432 0.00454636481095
dro 700 80 3.0 0.485103219018 0.00100355667431 0.00418536021049
dro 800 80 3.0 0.486519133916 0.000881878586969 0.00271425684769
dro 900 80 3.0 0.488241348276 0.000887980959325 0.00233122055984
dro 1000 80 3.0 0.489577886323 0.000702494617434 0.0031239469158
dro 400 80 4.0 0.474486456725 0.0015969746258 0.0036955428974
dro 500 80 4.0 0.477656159006 0.00126173730602 0.00494923685045
dro 550 80 4.0 0.47887620049 0.00116360617449 0.00442150240524
dro 600 80 4.0 0.479413863439 0.00128976645738 0.00470963321328
dro 700 80 4.0 0.480872732096 0.00112397208856 0.0049595918588
dro 800 80 4.0 0.482752389457 0.000982684149668 0.00537257384898
dro 900 80 4.0 0.483171454958 0.00100834065119 0.00222205783619
dro 1000 80 4.0 0.484853755615 0.000789887055663 0.0063182959896
dro 400 80 5.0 0.473151731337 0.0016915745461 0.00903665656467
dro 500 80 5.0 0.475155372283 0.00134951673861 0.0069406088081
dro 550 80 5.0 0.476168755738 0.00124971618711 0.00686178372687
dro 600 80 5.0 0.476930246698 0.00138692949092 0.00753797346792
dro 700 80 5.0 0.47783127437 0.00120658742872 0.0074141885954
dro 800 80 5.0 0.478995083306 0.00107494187299 0.00576747119977
dro 900 80 5.0 0.48005918923 0.00109862056579 0.00485767735812
dro 1000 80 5.0 0.481319352025 0.000851995400035 0.0086253561479
dro 400 90 0.266 0.590426180792 0.000776538833049 0.0103050990714
dro 500 90 0.266 0.615170811315 0.000512863006721 0.0105305550382
dro 550 90 0.266 0.627186537389 0.000436136018079 0.0113093268613
dro 600 90 0.266 0.638337156851 0.000447863791655 0.013664956194
dro 700 90 0.266 0.658834398156 0.000338451574332 0.0141269325484
dro 800 90 0.266 0.678199410305 0.000263427300065 0.0138728873288
dro 900 90 0.266 0.695935465584 0.000237790068757 0.0136795657029
dro 1000 90 0.266 0.712656833064 0.000167392393753 0.0166567045274
dro 400 90 0.375 0.530565829221 0.000944013094444 0.00250102602117
dro 500 90 0.375 0.5469585547 0.000657592908588 0.00247439167564
dro 550 90 0.375 0.555507682472 0.00057221438645 0.0035062171834
dro 600 90 0.375 0.563288545885 0.000600239978135 0.00428394390381
dro 700 90 0.375 0.578785960686 0.000471539141637 0.00379201670267
dro 800 90 0.375 0.59447487429 0.00037976029289 0.0031224236404
dro 900 90 0.375 0.609327129172 0.000353418065901 0.00123937554104
dro 1000 90 0.375 0.623990919636 0.000254901231895 0.00275255808393
dro 400 90 0.5 0.511166397283 0.000992345563369 0.00356109170168
dro 500 90 0.5 0.522197095698 0.000709081058716 0.0024391761689
dro 550 90 0.5 0.527831341461 0.000626994271786 0.00265934214925
dro 600 90 0.5 0.533462497752 0.000666223116986 0.0043037379597
dro 700 90 0.5 0.544021233089 0.000539773659722 0.00474766230747
dro 800 90 0.5 0.554800661672 0.000446664630652 0.00435200502859
dro 900 90 0.5 0.565251730812 0.000426731648269 0.00465362356353
dro 1000 90 0.5 0.57584578349 0.000315675170483 0.00604997496179
dro 400 90 0.75 0.496191508276 0.00106563965984 0.0033018605923
dro 500 90 0.75 0.503846222521 0.000775455472448 0.0034238034993
dro 550 90 0.75 0.507616861037 0.00069291921063 0.0037031701367
dro 600 90 0.75 0.510513940396 0.000746681947878 0.00341117708339
dro 700 90 0.75 0.516931783358 0.000621246501496 0.00459906368183
dro 800 90 0.75 0.523770140534 0.000527589478599 0.00245040388812
dro 900 90 0.75 0.529788074898 0.000517611651083 0.0042323601497
dro 1000 90 0.75 0.536361832484 0.000392700599544 0.00550051516867
dro 400 90 1.0 0.489812988316 0.00112324172277 0.00264283308848
dro 500 90 1.0 0.495407352858 0.000845545374688 0.00333933044944
dro 550 90 1.0 0.498375318454 0.000758298609878 0.0012561218181
dro 600 90 1.0 0.500961911762 0.000817532945626 0.00347357500047
dro 700 90 1.0 0.505364737384 0.000684675979798 0.00178265117006
dro 800 90 1.0 0.510370525525 0.000588620509579 0.00163867259595
dro 900 90 1.0 0.514625480417 0.000585136774294 0.00263157145081
dro 1000 90 1.0 0.519456566772 0.000447998820026 0.00328710615395
dro 400 90 1.5 0.483622678392 0.00127130199989 0.002504444355
dro 500 90 1.5 0.487856506924 0.000969925440111 0.00101134114348
dro 550 90 1.5 0.48980875958 0.000889444940659 0.00161201464391
dro 600 90 1.5 0.491374064906 0.000940374335453 0.00198121618441
dro 700 90 1.5 0.494387370503 0.000816594464899 0.00110061229843
dro 800 90 1.5 0.497844510823 0.000702751705165 0.0011251578818
dro 900 90 1.5 0.500804212418 0.000696682748159 0.000877833767862
dro 1000 90 1.5 0.503347471531 0.000537125089716 0.00101066366988
dro 400 90 2.0 0.480423191284 0.00140320195103 0.00313539320713
dro 500 90 2.0 0.483830328964 0.0010809684867 0.00100342512422
dro 550 90 2.0 0.48526224122 0.00098142105751 0.0012799717257
dro 600 90 2.0 0.486462143412 0.0010701220533 0.00257897620692
dro 700 90 2.0 0.489108564436 0.000928076047053 0.0012682786688
dro 800 90 2.0 0.492002743024 0.000778086065937 0.00159463214263
dro 900 90 2.0 0.493893733133 0.000799821085633 0.00218742446802
dro 1000 90 2.0 0.496102046618 0.000620508750089 0.0043251539515
dro 400 90 2.5 0.478015105563 0.00152506270202 0.00281530112934
dro 500 90 2.5 0.481830899427 0.00116280410053 0.00279498059117
dro 550 90 2.5 0.482408114446 0.00107058533515 0.000512233790665
dro 600 90 2.5 0.483973158264 0.00117130183942 0.00270233311394
dro 700 90 2.5 0.485651430788 0.00100029429003 0.00218753558728
dro 800 90 2.5 0.487864302754 0.000874925688907 0.00268445350297
dro 900 90 2.5 0.489524071314 0.000896302528304 0.00170214746589
dro 1000 90 2.5 0.4911688675 0.000667605990644 0.00309687333646
dro 400 90 3.0 0.477080112299 0.00161487674368 0.00465966198293
dro 500 90 3.0 0.479451238098 0.00125112984249 0.00312216401548
dro 550 90 3.0 0.480461788627 0.00115093717556 0.00205024488479
dro 600 90 3.0 0.481738809711 0.00125072325011 0.00422365051399
dro 700 90 3.0 0.483554197326 0.00107876008291 0.00394337495129
dro 800 90 3.0 0.485550540004 0.000943039922153 0.00314028763213
dro 900 90 3.0 0.486447872023 0.000948491241921 0.00147375037453
dro 1000 90 3.0 0.488433639815 0.000743729409833 0.00492722837547
dro 400 90 4.0 0.473210645868 0.00177759164266 0.00490434469537
dro 500 90 4.0 0.476494515706 0.00137932562204 0.00484424595557
dro 550 90 4.0 0.477379141377 0.00126481227253 0.00421180763623
dro 600 90 4.0 0.478575669265 0.00139231466055 0.00491226927812
dro 700 90 4.0 0.479531263739 0.00120650553504 0.004634864095
dro 800 90 4.0 0.481733605811 0.00104967035451 0.00541260687204
dro 900 90 4.0 0.481340061351 0.00107324068281 0.00244729735379
dro 1000 90 4.0 0.483531120493 0.000836560152308 0.00605855967712
dro 400 90 5.0 0.47097424548 0.00188963829913 0.00962387317305
dro 500 90 5.0 0.474994861263 0.00146740556663 0.00854010308361
dro 550 90 5.0 0.475273595966 0.00135507519859 0.0060450592756
dro 600 90 5.0 0.476170613675 0.00149771149808 0.00821336618203
dro 700 90 5.0 0.477269807221 0.00129073859394 0.00749346270726
dro 800 90 5.0 0.478769753277 0.00113849064669 0.00730412791596
dro 900 90 5.0 0.479820813046 0.0011575048488 0.00686392714857
dro 1000 90 5.0 0.480232176795 0.000902756977212 0.0087108782813
hol 400 5 0.266 0.94663645919 3.19985437449e-05 0.0231323193484
hol 500 5 0.266 0.964189545854 2.16128246325e-05 0.00686905776768
hol 550 5 0.266 0.969807260497 1.83644403454e-05 0.00423761324942
hol 600 5 0.266 0.974434506623 1.86931222102e-05 0.00830409794299
hol 700 5 0.266 0.980671814409 1.36843349805e-05 0.0135212719781
hol 800 5 0.266 0.985225564364 1.04664046939e-05 0.0242169037285
hol 900 5 0.266 0.9881645066 1.01780438722e-05 0.0112339889911
hol 1000 5 0.266 0.990267063196 6.2670889438e-06 0.0156014894803
hol 400 5 0.375 0.905285494735 5.56446411702e-05 0.0242721742527
hol 500 5 0.375 0.934308948493 3.81851525509e-05 0.00950987491112
hol 550 5 0.375 0.943908847923 3.274120489e-05 0.00677133100249
hol 600 5 0.375 0.952043803917 3.35660616271e-05 0.009331602194
hol 700 5 0.375 0.963233404788 2.49380507194e-05 0.0155675813817
hol 800 5 0.375 0.971567082966 1.92976383582e-05 0.0247850089672
hol 900 5 0.375 0.977038540408 1.75892573251e-05 0.0126430770904
hol 1000 5 0.375 0.980966159297 1.17651767901e-05 0.0159606848828
hol 400 5 0.5 0.855814198016 8.64298129282e-05 0.0250556666584
hol 500 5 0.5 0.895950298768 6.00490664487e-05 0.0114126138678
hol 550 5 0.5 0.909845612607 5.18445711266e-05 0.00896792854323
hol 600 5 0.5 0.921995582439 5.34440128992e-05 0.0106366816453
hol 700 5 0.5 0.939039660228 4.02188642039e-05 0.0177616170647
hol 800 5 0.5 0.952262052803 3.14488511621e-05 0.0259007140431
hol 900 5 0.5 0.961085196923 2.83362845847e-05 0.0144646957673
hol 1000 5 0.5 0.967524250305 1.95047675879e-05 0.0168091426655
hol 400 5 0.75 0.768514103795 0.000132429147156 0.0220931115155
hol 500 5 0.75 0.820355201531 0.000107255120051 0.0107517899508
hol 550 5 0.75 0.839773218758 9.51936246371e-05 0.00952397916672
hol 600 5 0.75 0.857911551559 9.91198878322e-05 0.0110913562802
hol 700 5 0.75 0.88446421446 7.5955553741e-05 0.0203162583141
hol 800 5 0.75 0.906791437793 6.01902437537e-05 0.0273573574808
hol 900 5 0.75 0.92208901199 5.44554772356e-05 0.0175378868748
hol 1000 5 0.75 0.933892198354 3.8278054474e-05 0.0182526444797
hol 400 5 1.0 0.704647684479 0.000162893853578 0.0180830903241
hol 500 5 1.0 0.757877475158 0.000134296570536 0.00705556227701
hol 550 5 1.0 0.778506474448 0.000125152372654 0.0065772719519
hol 600 5 1.0 0.799640477016 0.000138657680277 0.00972281444117
hol 700 5 1.0 0.83072019336 0.000115220036978 0.0197783079582
hol 800 5 1.0 0.859625068071 9.29114607241e-05 0.0275339419853
hol 900 5 1.0 0.879720387584 8.46442395633e-05 0.0190485649156
hol 1000 5 1.0 0.896014375064 6.01291630253e-05 0.0193737741545
hol 400 5 1.5 0.627949221486 0.000220207537115 0.0232318712141
hol 500 5 1.5 0.673964349298 0.000178179780337 0.00571157287585
hol 550 5 1.5 0.69198191973 0.000164725649356 0.0024842959868
hol 600 5 1.5 0.713002962316 0.000182367358858 0.0048152473278
hol 700 5 1.5 0.743845707316 0.000158076381905 0.0147815777329
hol 800 5 1.5 0.777179575061 0.000140094290014 0.0252122861012
hol 900 5 1.5 0.801033937668 0.000139738108544 0.0175331924042
hol 1000 5 1.5 0.822196015729 0.000106797473026 0.0192326156098
hol 400 5 2.0 0.586332641561 0.00027219054767 0.0236467797268
hol 500 5 2.0 0.624544067951 0.000219667886151 0.00713740050556
hol 550 5 2.0 0.639200199909 0.000202478672938 0.00479952290715
hol 600 5 2.0 0.658225312978 0.000223052765109 0.00851345438887
hol 700 5 2.0 0.684732587195 0.000192015536734 0.0141128672144
hol 800 5 2.0 0.716670431823 0.000167942530303 0.0221148361832
hol 900 5 2.0 0.739309225775 0.000168281030655 0.0137791673435
hol 1000 5 2.0 0.761050309844 0.00013183228199 0.0162859786965
hol 400 5 2.5 0.560470765357 0.000314167702216 0.0227889344233
hol 500 5 2.5 0.593285411673 0.00025787887586 0.00720165794043
hol 550 5 2.5 0.605208612531 0.000239609637007 0.00513260270453
hol 600 5 2.5 0.621984275183 0.000262560766608 0.00982860625103
hol 700 5 2.5 0.644326105952 0.000224942033057 0.015244234934
hol 800 5 2.5 0.673510577756 0.000195282803001 0.0235399996339
hol 900 5 2.5 0.69333887071 0.000194918530837 0.0112304434478
hol 1000 5 2.5 0.713947123922 0.000151822096998 0.0140282838212
hol 400 5 3.0 0.543266880724 0.00035478288023 0.0216330817697
hol 500 5 3.0 0.571600926845 0.000289229261404 0.0062347544031
hol 550 5 3.0 0.581687159451 0.000270152069719 0.005053135593
hol 600 5 3.0 0.596881351258 0.00029877481137 0.00949302877708
hol 700 5 3.0 0.615687403658 0.000258032310403 0.0152712691731
hol 800 5 3.0 0.641824499066 0.00022179911573 0.0247867715696
hol 900 5 3.0 0.659304893095 0.000221252573897 0.013045119332
hol 1000 5 3.0 0.677960630388 0.000171763333767 0.0138846677665
hol 400 5 4.0 0.521207227447 0.000419758614763 0.0192275187409
hol 500 5 4.0 0.544293350351 0.000348387466045 0.00583187113254
hol 550 5 4.0 0.551799129246 0.000328142510263 0.00345320818975
hol 600 5 4.0 0.564197049026 0.000361321696381 0.00747065900582
hol 700 5 4.0 0.578030106042 0.000313275184423 0.0143013720496
hol 800 5 4.0 0.599949085494 0.000272620066016 0.0239787235421
hol 900 5 4.0 0.613192829813 0.000273636851837 0.0124168556999
hol 1000 5 4.0 0.62771762712 0.000210352276625 0.0151013075969
hol 400 5 5.0 0.507206037553 0.000466359568313 0.0164048390467
hol 500 5 5.0 0.527346433558 0.000396937230457 0.00472974463071
hol 550 5 5.0 0.533013281475 0.000372769753464 0.00221971039307
hol 600 5 5.0 0.544141578495 0.000414477830129 0.00492417508507
hol 700 5 5.0 0.554768622108 0.000365015641594 0.0118428433691
hol 800 5 5.0 0.572736305418 0.000314707153463 0.0222308437273
hol 900 5 5.0 0.583383647297 0.000317413870175 0.0124436454498
hol 1000 5 5.0 0.595121156788 0.000246625627769 0.0134765047849
hol 400 10 0.266 0.860686728096 6.93369066093e-05 0.0141887195794
hol 500 10 0.266 0.894827212904 4.85542033363e-05 0.0165529296846
hol 550 10 0.266 0.907268412579 4.19387212821e-05 0.0105357120502
hol 600 10 0.266 0.918262464485 4.34344787604e-05 0.0110315459415
hol 700 10 0.266 0.935063817299 3.29307449873e-05 0.015646018999
hol 800 10 0.266 0.947312314332 2.57827435707e-05 0.0169995523308
hol 900 10 0.266 0.956947706617 2.34915428421e-05 0.0137583156669
hol 1000 10 0.266 0.963699087466 1.62545371339e-05 0.00838711919857
hol 400 10 0.375 0.783755816736 0.000108449057635 0.0114605776437
hol 500 10 0.375 0.828737329396 7.9038089974e-05 0.016608340998
hol 550 10 0.375 0.846143988546 6.8879440325e-05 0.0115026111745
hol 600 10 0.375 0.862098282531 7.18821976434e-05 0.0119129141838
hol 700 10 0.375 0.887226385671 5.5219725245e-05 0.0180565818794
hol 800 10 0.375 0.906552608143 4.38166593995e-05 0.0183546257164
hol 900 10 0.375 0.922186052197 3.99141067876e-05 0.0164417925848
hol 1000 10 0.375 0.933494526481 2.82432775006e-05 0.0096520852297
hol 400 10 0.5 0.714702785118 0.000144494984417 0.00544383981617
hol 500 10 0.5 0.763088556663 0.000109700646856 0.0129581649304
hol 550 10 0.5 0.782754890506 9.87624610899e-05 0.00884632971424
hol 600 10 0.5 0.801716242733 0.00010556091951 0.0106439043116
hol 700 10 0.5 0.832617004836 8.24753051096e-05 0.0179109045653
hol 800 10 0.5 0.857890138034 6.63297995799e-05 0.0188403638032
hol 900 10 0.5 0.879083217991 6.082757896e-05 0.0180306523778
hol 1000 10 0.5 0.894824267492 4.35669615514e-05 0.0108243669709
hol 400 10 0.75 0.629874143953 0.000190633278857 0.00507543256827
hol 500 10 0.75 0.672342116629 0.000157503188119 0.00787389863376
hol 550 10 0.75 0.690862740094 0.00014402383919 0.00164119752392
hol 600 10 0.75 0.71009848555 0.000155973710808 0.0055214549502
hol 700 10 0.75 0.742521963508 0.000129171858012 0.0125650464304
hol 800 10 0.75 0.772262007254 0.000109841804331 0.0158919087711
hol 900 10 0.75 0.798374591653 0.000104675822913 0.016085169556
hol 1000 10 0.75 0.818851412401 7.62793927132e-05 0.0103002609228
hol 400 10 1.0 0.583895313744 0.000217456487403 0.00691884681474
hol 500 10 1.0 0.61884283457 0.000181858257679 0.0100332829218
hol 550 10 1.0 0.634462941298 0.000171384689129 0.00496641039473
hol 600 10 1.0 0.651752463857 0.000192642094072 0.00819985664981
hol 700 10 1.0 0.680632619407 0.000166711403937 0.00993998843502
hol 800 10 1.0 0.709534754135 0.000142811289952 0.0124116356466
hol 900 10 1.0 0.73522599562 0.000138740973889 0.0115776188617
hol 1000 10 1.0 0.756067589059 0.000104813322512 0.00764310561606
hol 400 10 1.5 0.53864297261 0.000266510677386 0.0054787982079
hol 500 10 1.5 0.562819568137 0.000218914269617 0.0113876534019
hol 550 10 1.5 0.573554939771 0.000204541224941 0.00580535388233
hol 600 10 1.5 0.587153698908 0.000229155495081 0.0109319984754
hol 700 10 1.5 0.608329283446 0.00020343054338 0.0140577220169
hol 800 10 1.5 0.633419874818 0.000184429474016 0.0168081226191
hol 900 10 1.5 0.654225184184 0.000188888747464 0.012849091432
hol 1000 10 1.5 0.671800441874 0.000148690121957 0.00692277746833
hol 400 10 2.0 0.517433337392 0.000312806972333 0.00403342287402
hol 500 10 2.0 0.535415970204 0.000254914116173 0.00965854456525
hol 550 10 2.0 0.543030763844 0.000236832885637 0.00496692976102
hol 600 10 2.0 0.554163126063 0.000263610726995 0.010369816243
hol 700 10 2.0 0.569663729967 0.000231637745779 0.0132633662921
hol 800 10 2.0 0.591450334507 0.000206481207026 0.0178532640539
hol 900 10 2.0 0.607738404375 0.000211635956111 0.0128709797559
hol 1000 10 2.0 0.621769860117 0.000169426209415 0.00951362950816
hol 400 10 2.5 0.504110350265 0.000353600790379 0.00374903821835
hol 500 10 2.5 0.519707409428 0.000289602887196 0.00699411171001
hol 550 10 2.5 0.52569459979 0.000269941868235 0.00306581726834
hol 600 10 2.5 0.534616553352 0.000298611606345 0.00900062169078
hol 700 10 2.5 0.546677365319 0.000259864516928 0.0128733013593
hol 800 10 2.5 0.565281349739 0.000229407741941 0.0175805781879
hol 900 10 2.5 0.578498340928 0.000233311000858 0.0136359376043
hol 1000 10 2.5 0.58997485511 0.000185332957608 0.00991516034778
hol 400 10 3.0 0.495397346137 0.000394567898685 0.00227838019472
hol 500 10 3.0 0.508462784418 0.000320478539602 0.00686651869771
hol 550 10 3.0 0.513589870665 0.00029909764766 0.00365200211901
hol 600 10 3.0 0.522350005554 0.000331629754004 0.00672463278508
hol 700 10 3.0 0.53145944477 0.000289677944204 0.0100916189546
hol 800 10 3.0 0.547995328609 0.000252335143622 0.0162230918988
hol 900 10 3.0 0.558806681261 0.000255551107882 0.0124127537292
hol 1000 10 3.0 0.568040734218 0.000201976509278 0.00933292613542
hol 400 10 4.0 0.483680431996 0.000465634726193 0.00340268456619
hol 500 10 4.0 0.494563628365 0.00038144748229 0.00663520860266
hol 550 10 4.0 0.498326795339 0.000357596116566 0.00201589716746
hol 600 10 4.0 0.505196420727 0.000394938885968 0.00465825928608
hol 700 10 4.0 0.512500959885 0.000342359896367 0.00978355243418
hol 800 10 4.0 0.5271067458 0.000298455365458 0.0125282922171
hol 900 10 4.0 0.534320958554 0.000302398419812 0.0109109296261
hol 1000 10 4.0 0.540625082058 0.000235609151103 0.00681646528671
hol 400 10 5.0 0.475788862348 0.000519447573131 0.00526266756336
hol 500 10 5.0 0.485499238311 0.000435390947687 0.00902642159599
hol 550 10 5.0 0.488193551536 0.000406497685808 0.003439622264
hol 600 10 5.0 0.494922964679 0.000450927984267 0.00723578223991
hol 700 10 5.0 0.500491287273 0.000395055479753 0.0110797311507
hol 800 10 5.0 0.512803521107 0.000340842449255 0.0130747112136
hol 900 10 5.0 0.519128706939 0.000344271137124 0.0106538027226
hol 1000 10 5.0 0.524291089026 0.00026889154111 0.00499720923532
hol 400 15 0.266 0.795379882207 0.000110711325444 0.0172533749647
hol 500 15 0.266 0.834429274375 7.96431793209e-05 0.0162923860419
hol 550 15 0.266 0.849551550993 6.89629484095e-05 0.01349787247
hol 600 15 0.266 0.863396959932 7.16707673932e-05 0.0134729257447
hol 700 15 0.266 0.886487564001 5.49338981991e-05 0.0158507354516
hol 800 15 0.266 0.903814768637 4.34508346988e-05 0.013461807712
hol 900 15 0.266 0.918605423677 3.96685933318e-05 0.0150361849965
hol 1000 15 0.266 0.929641314256 2.81145610732e-05 0.00776248166655
hol 400 15 0.375 0.70779248996 0.000157555649249 0.00913710104386
hol 500 15 0.375 0.752640305459 0.000118977780502 0.011698895677
hol 550 15 0.375 0.771066073073 0.000106162873412 0.0101715236061
hol 600 15 0.375 0.788321513492 0.000113268938899 0.0114692568981
hol 700 15 0.375 0.818409154583 8.89918496877e-05 0.015309593939
hol 800 15 0.375 0.842298601742 7.10773873531e-05 0.013651955101
hol 900 15 0.375 0.863472101106 6.51269565246e-05 0.0166167178382
hol 1000 15 0.375 0.879828179069 4.67263529373e-05 0.00881162046488
hol 400 15 0.5 0.642749345572 0.000194382740175 0.0042284196985
hol 500 15 0.5 0.684646968568 0.000150926718336 0.00492188441686
hol 550 15 0.5 0.702830410033 0.000137743388846 0.00401228271018
hol 600 15 0.5 0.720574335219 0.000149913494455 0.00771116400324
hol 700 15 0.5 0.752748846136 0.00012253269567 0.0114781632174
hol 800 15 0.5 0.77974087018 0.000102361107037 0.0120611173225
hol 900 15 0.5 0.804651123381 9.59506074528e-05 0.0152218279576
hol 1000 15 0.5 0.824615906944 6.94985090873e-05 0.0087199471934
hol 400 15 0.75 0.574915176081 0.000249599073645 0.00799551619375
hol 500 15 0.75 0.606263295896 0.000196357320294 0.00759316899848
hol 550 15 0.75 0.620441005032 0.000180152690778 0.00483953605702
hol 600 15 0.75 0.635433689356 0.000197812926074 0.00877974365926
hol 700 15 0.75 0.663348514074 0.000168087994356 0.00689821961844
hol 800 15 0.75 0.689150393578 0.000146701398324 0.00671526387847
hol 900 15 0.75 0.71436511454 0.000144034334706 0.0088971336781
hol 1000 15 0.75 0.73531118189 0.000108660867549 0.00435963675182
hol 400 15 1.0 0.542666069675 0.000295401782767 0.00691652955673
hol 500 15 1.0 0.566205504954 0.000234203859711 0.00836217785712
hol 550 15 1.0 0.577152583695 0.000215146870607 0.00571479767674
hol 600 15 1.0 0.589225311127 0.000237112513784 0.0109977267338
hol 700 15 1.0 0.611137213337 0.000202360386465 0.00970871929276
hol 800 15 1.0 0.633490630309 0.000177063623623 0.0111067548357
hol 900 15 1.0 0.655074454142 0.000176034031229 0.00904050255266
hol 1000 15 1.0 0.673918702253 0.000135937864478 0.00375114609449
hol 400 15 1.5 0.511698204206 0.000373061292961 0.00528148659322
hol 500 15 1.5 0.527088082088 0.000301985923375 0.00615037299649
hol 550 15 1.5 0.534573416517 0.00027761407601 0.00426026395019
hol 600 15 1.5 0.543314420219 0.000307112536199 0.00993710238482
hol 700 15 1.5 0.557608766433 0.00026282964671 0.00954002875696
hol 800 15 1.5 0.574331647451 0.00022997879692 0.0130851260469
hol 900 15 1.5 0.589737817439 0.000228663194379 0.0116030915675
hol 1000 15 1.5 0.603100223478 0.00017719492544 0.00799803160695
hol 400 15 2.0 0.497065075154 0.000445701261094 0.00377783341476
hol 500 15 2.0 0.50884728322 0.000360353019165 0.00525090670754
hol 550 15 2.0 0.513763137744 0.000333963072048 0.00449483075362
hol 600 15 2.0 0.520261135049 0.000371030791797 0.00891099185477
hol 700 15 2.0 0.531015856831 0.000316316314063 0.00836074857562
hol 800 15 2.0 0.545037895024 0.000278059880095 0.0111715636309
hol 900 15 2.0 0.556261645595 0.000276714421849 0.0106666528784
hol 1000 15 2.0 0.566071073021 0.000214031412906 0.0078059213887
hol 400 15 2.5 0.487934647244 0.000486297177418 0.00450176523098
hol 500 15 2.5 0.497920358087 0.000418004339093 0.00484309308518
hol 550 15 2.5 0.501957649082 0.000390355208463 0.00260415914214
hol 600 15 2.5 0.507225492295 0.000427570456301 0.00720671370485
hol 700 15 2.5 0.51519177764 0.000367182324997 0.00725515835813
hol 800 15 2.5 0.526930384402 0.00032201180732 0.0101940631923
hol 900 15 2.5 0.535856914915 0.000319229339689 0.00947856835386
hol 1000 15 2.5 0.544049148193 0.000248636810802 0.0062365113074
hol 400 15 3.0 0.482073782477 0.000546045399957 0.00411957090262
hol 500 15 3.0 0.490125767975 0.000447880439408 0.00259308811712
hol 550 15 3.0 0.493793428457 0.000426233120712 0.00113980845798
hol 600 15 3.0 0.498819421214 0.000481802456546 0.00533134167569
hol 700 15 3.0 0.505052274114 0.000416422050174 0.00677882175478
hol 800 15 3.0 0.515105943688 0.000360676555057 0.00904578967332
hol 900 15 3.0 0.522547786348 0.000361837586894 0.00865802145965
hol 1000 15 3.0 0.528572304632 0.000280655017985 0.00564363330995
hol 400 15 4.0 0.473431518796 0.000618516690158 0.0047833865516
hol 500 15 4.0 0.480307645028 0.000527739298161 0.00448090766842
hol 550 15 4.0 0.482579703915 0.000502739150248 0.00178561140677
hol 600 15 4.0 0.486985281446 0.000550917293515 0.00416906891693
hol 700 15 4.0 0.491590835054 0.000484739234218 0.00579023900548
hol 800 15 4.0 0.500708181204 0.000438026698779 0.00737021961273
hol 900 15 4.0 0.505635451874 0.000441204387543 0.0068481266129
hol 1000 15 4.0 0.509976067435 0.000337944387788 0.00223875652084
hol 400 15 5.0 0.467391350202 0.000679106926362 0.00685136796192
hol 500 15 5.0 0.473544090154 0.000584120344893 0.00595262519269
hol 550 15 5.0 0.475620799079 0.000550100238816 0.0041872250075
hol 600 15 5.0 0.479156325936 0.000620308111696 0.00751947278329
hol 700 15 5.0 0.482976942461 0.000555286662945 0.00785628739708
hol 800 15 5.0 0.490604798146 0.000479598332832 0.00875586926067
hol 900 15 5.0 0.495134299726 0.000493888504091 0.00952245892786
hol 1000 15 5.0 0.498532645852 0.0003931587536 0.0042813986053
hol 400 20 0.266 0.746859379162 0.000153285556463 0.0168484812469
hol 500 20 0.266 0.785949859129 0.000112451252676 0.0154516716343
hol 550 20 0.266 0.80218699135 9.82887459112e-05 0.0145859393553
hol 600 20 0.266 0.816792902911 0.000102382883322 0.0135735303391
hol 700 20 0.266 0.84260216298 7.85441659078e-05 0.0158379282248
hol 800 20 0.266 0.86286408785 6.22496510745e-05 0.0118959544823
hol 900 20 0.266 0.880861718745 5.70114571424e-05 0.0157647123929
hol 1000 20 0.266 0.894774464332 4.07495455217e-05 0.00931846840433
hol 400 20 0.375 0.657995712694 0.000209609004868 0.00554811566834
hol 500 20 0.375 0.698735147333 0.000157764521548 0.00708238928261
hol 550 20 0.375 0.716293376544 0.000141835043341 0.00724424264549
hol 600 20 0.375 0.732752098029 0.000152798235884 0.00933097237899
hol 700 20 0.375 0.763353588537 0.000122843378965 0.0119474477978
hol 800 20 0.375 0.788348328241 9.97675963387e-05 0.0102728984149
hol 900 20 0.375 0.811628218371 9.16516419253e-05 0.0148047202783
hol 1000 20 0.375 0.830270506105 6.59822944662e-05 0.00932306691575
hol 400 20 0.5 0.600762213148 0.000255467046458 0.00579393073215
hol 500 20 0.5 0.635593182842 0.000193512856739 0.00345675852099
hol 550 20 0.5 0.651440012575 0.000175048928715 0.00158846902547
hol 600 20 0.5 0.666968567614 0.000190173042262 0.0037428395336
hol 700 20 0.5 0.69642252654 0.00015814884409 0.00591848144214
hol 800 20 0.5 0.721913576157 0.000134565760834 0.00679501491706
hol 900 20 0.5 0.746532843515 0.000128950989787 0.01069238081
hol 1000 20 0.5 0.767041586685 9.52369264254e-05 0.00634584065512
hol 400 20 0.75 0.54625060414 0.000324543929114 0.0068917942426
hol 500 20 0.75 0.570361149742 0.000253289687411 0.00623343988238
hol 550 20 0.75 0.581755151841 0.000229813673815 0.00545164348195
hol 600 20 0.75 0.593356431755 0.000249523695671 0.00969093531706
hol 700 20 0.75 0.616448534688 0.000208125266244 0.00711834045081
hol 800 20 0.75 0.638140532294 0.000179326754576 0.00680667592921
hol 900 20 0.75 0.659862150575 0.000176368558997 0.007131644074
hol 1000 20 0.75 0.678761919618 0.000135026165242 0.000839381167615
hol 400 20 1.0 0.521610531737 0.000381646761518 0.00610636526116
hol 500 20 1.0 0.539149989674 0.00030167112785 0.00519559013358
hol 550 20 1.0 0.547422770517 0.000276414693429 0.00541811168467
hol 600 20 1.0 0.556447898806 0.000303785342447 0.0101270709915
hol 700 20 1.0 0.573954084118 0.000255334210543 0.00771900735084
hol 800 20 1.0 0.591153896381 0.000219319792568 0.00980974263185
hol 900 20 1.0 0.609025774512 0.000214720963336 0.00995443725566
hol 1000 20 1.0 0.624733615037 0.000164214254701 0.00514238534421
hol 400 20 1.5 0.498016433454 0.000467537056028 0.00376818855178
hol 500 20 1.5 0.509674188681 0.000379100302429 0.00293513331317
hol 550 20 1.5 0.515159705667 0.000352519772949 0.00325947373136
hol 600 20 1.5 0.52139184069 0.000394454768754 0.00822546413796
hol 700 20 1.5 0.532252285104 0.000337557929894 0.0060077282043
hol 800 20 1.5 0.544324473826 0.000292077563667 0.00935027945249
hol 900 20 1.5 0.556445688521 0.000289303025711 0.00993762238641
hol 1000 20 1.5 0.566832276076 0.000222095748028 0.00663787905873
hol 400 20 2.0 0.486796696567 0.000544465672907 0.00246533098878
hol 500 20 2.0 0.495493284751 0.000445054335524 0.00255436355107
hol 550 20 2.0 0.499340642219 0.000417780969299 0.00221941088528
hol 600 20 2.0 0.50409042391 0.000463473933043 0.00658674559634
hol 700 20 2.0 0.512309760936 0.00039708193581 0.00483133416922
hol 800 20 2.0 0.522045353679 0.00035615734293 0.00727627226778
hol 900 20 2.0 0.530625338082 0.000355596855912 0.009091762118
hol 1000 20 2.0 0.537838358938 0.000271755328811 0.0058367655739
hol 400 20 2.5 0.479921629025 0.000587285363628 0.00525447876937
hol 500 20 2.5 0.487230097949 0.000508084307789 0.000941946305287
hol 550 20 2.5 0.490104484172 0.000475440943003 0.000615122166812
hol 600 20 2.5 0.493956644634 0.000524180340684 0.00521403197422
hol 700 20 2.5 0.50003324649 0.00045817742344 0.00420780683745
hol 800 20 2.5 0.508322500784 0.000400999525739 0.00584559583654
hol 900 20 2.5 0.514975941593 0.000402152637246 0.00643341484876
hol 1000 20 2.5 0.521328861053 0.00031734958336 0.00368871032836
hol 400 20 3.0 0.475337790527 0.000655504488381 0.00372113974558
hol 500 20 3.0 0.481227983012 0.000541126674382 0.00197632709184
hol 550 20 3.0 0.48396190864 0.000518055669105 0.00174226727832
hol 600 20 3.0 0.487047955868 0.000584769075028 0.00490466656077
hol 700 20 3.0 0.49189491873 0.000507937729958 0.00403716931914
hol 800 20 3.0 0.499370141372 0.000448203655773 0.0045352209156
hol 900 20 3.0 0.504591051824 0.000451078394726 0.00620964211579
hol 1000 20 3.0 0.50930580926 0.000349244708988 0.00282391927701
hol 400 20 4.0 0.468135129913 0.000731815402263 0.00487620476186
hol 500 20 4.0 0.473251882659 0.000627479368686 0.00310018741056
hol 550 20 4.0 0.475536031493 0.000599798320454 0.00339415803838
hol 600 20 4.0 0.477872240781 0.000658184392749 0.00457466203378
hol 700 20 4.0 0.482012429122 0.000584776159853 0.00507348087391
hol 800 20 4.0 0.487895829036 0.000530614980583 0.00380049825124
hol 900 20 4.0 0.491503508089 0.000536344522845 0.00549810376885
hol 1000 20 4.0 0.494825204472 0.000414867054401 0.000452255034977
hol 400 20 5.0 0.462874779274 0.00079696278706 0.00646340300622
hol 500 20 5.0 0.468025263873 0.000687423554008 0.00560022003738
hol 550 20 5.0 0.469428134436 0.000649300926542 0.00474882022936
hol 600 20 5.0 0.472083895678 0.000732897575861 0.00351396097287
hol 700 20 5.0 0.474958427149 0.000659801932851 0.00692155369762
hol 800 20 5.0 0.479866252372 0.00057455138405 0.00460993102832
hol 900 20 5.0 0.483213769249 0.000598263087676 0.00829183452759
hol 1000 20 5.0 0.485879170161 0.0004751079542 0.00307621479207
hol 400 25 0.266 0.708077096585 0.000201595869917 0.0157915235206
hol 500 25 0.266 0.745701968688 0.000146444083202 0.0146710858657
hol 550 25 0.266 0.762070050692 0.000128799190768 0.0149031911343
hol 600 25 0.266 0.776818888009 0.000135231872586 0.0134804668749
hol 700 25 0.266 0.803650226613 0.000104591206065 0.0157234598624
hol 800 25 0.266 0.825584014103 8.28296129266e-05 0.0115277050362
hol 900 25 0.266 0.845439835 7.59654796942e-05 0.0157922088005
hol 1000 25 0.266 0.861336316866 5.44673290049e-05 0.0123897376228
hol 400 25 0.375 0.620977169343 0.000276140883692 0.00260467822405
hol 500 25 0.375 0.657155180798 0.000203700699006 0.00355451169497
hol 550 25 0.375 0.673292938044 0.000181281719687 0.00424315188451
hol 600 25 0.375 0.6888142825 0.000193681869663 0.00694350247213
hol 700 25 0.375 0.718050574538 0.000156428402152 0.00864438299811
hol 800 25 0.375 0.742993462339 0.000128735096828 0.00701431932146
hol 900 25 0.375 0.766613447481 0.000119972425941 0.0120123035967
hol 1000 25 0.375 0.786164553366 8.67113450606e-05 0.00982878740814
hol 400 25 0.5 0.571380601951 0.000327104330355 0.00536302441692
hol 500 25 0.5 0.60044199339 0.000246902413382 0.0036286234601
hol 550 25 0.5 0.614082474317 0.000222389469924 0.00387049334145
hol 600 25 0.5 0.627373937047 0.000240175582441 0.00524994447097
hol 700 25 0.5 0.653511866994 0.000197414786349 0.0024555258163
hol 800 25 0.5 0.676668256863 0.000166332109402 0.00324074708079
hol 900 25 0.5 0.699777803868 0.0001601087362 0.00604880403681
hol 1000 25 0.5 0.719445066498 0.000119815653296 0.00446566875748
hol 400 25 0.75 0.526799547717 0.000401081341682 0.00502276953873
hol 500 25 0.75 0.546351013898 0.000313621716471 0.00500154394452
hol 550 25 0.75 0.555466973829 0.00028425019267 0.00503919965033
hol 600 25 0.75 0.564890842365 0.000308480868198 0.00900182502157
hol 700 25 0.75 0.584011195634 0.000257466325604 0.00683045609622
hol 800 25 0.75 0.601952078221 0.000221180959345 0.00680180939486
hol 900 25 0.75 0.62035282583 0.000216297848725 0.00663793679354
hol 1000 25 0.75 0.636729513577 0.00016454985337 0.00317867915682
hol 400 25 1.0 0.507546332622 0.000463659682656 0.00463810045049
hol 500 25 1.0 0.521501935796 0.000365314926053 0.00403434578138
hol 550 25 1.0 0.528024882286 0.000335744985591 0.00425480075647
hol 600 25 1.0 0.534900254188 0.00037039940515 0.00868068375785
hol 700 25 1.0 0.549030088366 0.000311597502149 0.00605894650569
hol 800 25 1.0 0.563001380889 0.000267218348681 0.00778666974959
hol 900 25 1.0 0.577290383824 0.000262070435206 0.00795114111584
hol 1000 25 1.0 0.590521295332 0.00020048662491 0.0051206787051
hol 400 25 1.5 0.488933578988 0.000554859316159 0.00384669193129
hol 500 25 1.5 0.498121692945 0.000448079975998 0.0031584978994
hol 550 25 1.5 0.502441874635 0.000419305839699 0.00211887347871
hol 600 25 1.5 0.507263333916 0.000471166119701 0.00616316298001
hol 700 25 1.5 0.516001279862 0.000403157229193 0.00421225360985
hol 800 25 1.5 0.525152959463 0.000348867290276 0.00648118075109
hol 900 25 1.5 0.534343065488 0.000348433494826 0.00654235458244
hol 1000 25 1.5 0.542932778412 0.000267658550421 0.00504483430765
hol 400 25 2.0 0.480036473278 0.000633471057381 0.00370019069248
hol 500 25 2.0 0.486974806516 0.000519415389466 0.00264922074994
hol 550 25 2.0 0.490066000186 0.00048954726565 0.00337793255668
hol 600 25 2.0 0.493027983275 0.00054168703686 0.00568324297982
hol 700 25 2.0 0.499853450281 0.000466585533807 0.00472566873629
hol 800 25 2.0 0.507254319309 0.0004221668491 0.00486467269557
hol 900 25 2.0 0.514104025916 0.000422798057061 0.00522413359365
hol 1000 25 2.0 0.519946522973 0.000321933253033 0.0032501719903
hol 400 25 2.5 0.474032603169 0.0006837400479 0.00312975258606
hol 500 25 2.5 0.48001587335 0.0005847375786 0.000906153523418
hol 550 25 2.5 0.482638820987 0.000546154148237 0.000962312994989
hol 600 25 2.5 0.485311028261 0.000605787799492 0.00407271616506
hol 700 25 2.5 0.490333942506 0.000533709634714 0.00243677825172
hol 800 25 2.5 0.496094553767 0.000465725626728 0.00351918544961
hol 900 25 2.5 0.501569709301 0.000471756048049 0.00479516080915
hol 1000 25 2.5 0.506525872106 0.000374961605998 0.00258373942668
hol 400 25 3.0 0.470209071285 0.000754959274582 0.00312336052379
hol 500 25 3.0 0.475239107268 0.000623430916924 0.00412583830017
hol 550 25 3.0 0.477397613441 0.000595299314887 0.00287277699685
hol 600 25 3.0 0.479855661224 0.000668600228787 0.00285769623055
hol 700 25 3.0 0.483758268081 0.000582644109229 0.00200263758456
hol 800 25 3.0 0.489165773451 0.000519879705674 0.00296294672958
hol 900 25 3.0 0.493141072999 0.000522710333576 0.00412189298186
hol 1000 25 3.0 0.49708313409 0.000405216830426 0.000692089820462
hol 400 25 4.0 0.464133232227 0.000838228507628 0.00391617005745
hol 500 25 4.0 0.468698072332 0.000712847738731 0.00325949848205
hol 550 25 4.0 0.470256320147 0.000680020661954 0.00319632873493
hol 600 25 4.0 0.472509060085 0.000748336820093 0.00211513903511
hol 700 25 4.0 0.475291631258 0.000667087940353 0.00406341053384
hol 800 25 4.0 0.479728395115 0.000603186976832 0.00308171276562
hol 900 25 4.0 0.482619669902 0.000610919692617 0.00435329878468
hol 1000 25 4.0 0.485480719061 0.00047649984172 0.00200046218107
hol 400 25 5.0 0.459744864281 0.000906851438433 0.00589959973071
hol 500 25 5.0 0.464062577977 0.00077641107597 0.00490999813496
hol 550 25 5.0 0.465358778306 0.00073358728415 0.00472985748154
hol 600 25 5.0 0.46714021439 0.000827585684957 0.00392153894021
hol 700 25 5.0 0.469279447983 0.000743603884509 0.00540000005115
hol 800 25 5.0 0.473130510709 0.000652592247097 0.00325235158286
hol 900 25 5.0 0.475861953471 0.000678735783253 0.00705470734554
hol 1000 25 5.0 0.477881178944 0.000538307168423 0.00383671779341
hol 400 30 0.266 0.676296132481 0.000260497366022 0.0150577669832
hol 500 30 0.266 0.71219483021 0.000183967215569 0.0145005417068
hol 550 30 0.266 0.728011560826 0.000160944543656 0.0148200367321
hol 600 30 0.266 0.742542741874 0.000169288986443 0.0128877641359
hol 700 30 0.266 0.769525290444 0.000132518223444 0.0156220058341
hol 800 30 0.266 0.792189257572 0.000105615270599 0.0128508062591
hol 900 30 0.266 0.813061585119 9.68776616235e-05 0.0156103457709
hol 1000 30 0.266 0.830111335373 6.95241815462e-05 0.014582981925
hol 400 30 0.375 0.592238834167 0.000354091803939 0.00303651293492
hol 500 30 0.375 0.624283716521 0.000257666741248 0.00133382603768
hol 550 30 0.375 0.639160518279 0.000227435914444 0.00256281836787
hol 600 30 0.375 0.653234154982 0.000241287544144 0.00520993622915
hol 700 30 0.375 0.680516870144 0.000192525519897 0.00552247502821
hol 800 30 0.375 0.704576945558 0.000157895203461 0.00521822106348
hol 900 30 0.375 0.727824329357 0.000148667713939 0.00893308979371
hol 1000 30 0.375 0.747522126565 0.000108526598042 0.00934080301958
hol 400 30 0.5 0.549454486703 0.000407340443139 0.00549643496382
hol 500 30 0.5 0.573963856467 0.000306570087636 0.00380075651789
hol 550 30 0.5 0.5856322075 0.000275586129121 0.00356233705311
hol 600 30 0.5 0.597111731775 0.000296929283902 0.00603933263651
hol 700 30 0.5 0.619878499268 0.000242526800853 0.00426679180225
hol 800 30 0.5 0.640627160702 0.000202456847222 0.00261284340259
hol 900 30 0.5 0.661843227058 0.000193362144478 0.00233349725726
hol 1000 30 0.5 0.680319513547 0.000144130551589 0.00263490076884
hol 400 30 0.75 0.512797908379 0.000482212237505 0.00319139236282
hol 500 30 0.75 0.528814588389 0.000376231034737 0.00412560252679
hol 550 30 0.75 0.536343438252 0.00034093197372 0.00450285766699
hol 600 30 0.75 0.544121609398 0.000370375949759 0.00762422196081
hol 700 30 0.75 0.55994543726 0.000310401323427 0.00562498311858
hol 800 30 0.75 0.574916809665 0.000266902195478 0.00636432187175
hol 900 30 0.75 0.59050825178 0.00026091403136 0.00671092289781
hol 1000 30 0.75 0.604575730466 0.000198080796717 0.0051964799223
hol 400 30 1.0 0.497102195483 0.000548457672465 0.00374199284481
hol 500 30 1.0 0.508474558586 0.000429657200089 0.00401473107234
hol 550 30 1.0 0.513812454433 0.000395544846073 0.00317066200678
hol 600 30 1.0 0.51944865747 0.000436755415491 0.00703574272071
hol 700 30 1.0 0.531186757576 0.000367845622484 0.0053986487212
hol 800 30 1.0 0.542478957039 0.000316403661697 0.00626163027088
hol 900 30 1.0 0.554204093237 0.000311717451892 0.00624535541336
hol 1000 30 1.0 0.565236231326 0.000239240800228 0.00539985191575
hol 400 30 1.5 0.481704811582 0.000646547295945 0.00250864841223
hol 500 30 1.5 0.489481058109 0.000517219557437 0.00330039240668
hol 550 30 1.5 0.493069859427 0.0004844017822 0.00295906882381
hol 600 30 1.5 0.496751777064 0.000544444347643 0.00542792927554
hol 700 30 1.5 0.503912128258 0.000465569725621 0.00207580024991
hol 800 30 1.5 0.51158367188 0.000403592912504 0.00449303072606
hol 900 30 1.5 0.51876289147 0.000405509482308 0.00329212956814
hol 1000 30 1.5 0.525735633167 0.000312267133063 0.0044680387411
hol 400 30 2.0 0.474144877641 0.000729324160213 0.00232177495742
hol 500 30 2.0 0.480188944138 0.000594178754068 0.000654828241261
hol 550 30 2.0 0.48259231561 0.000559904428028 0.00182158071621
hol 600 30 2.0 0.485416512476 0.000616584133553 0.00439203915948
hol 700 30 2.0 0.490755137395 0.000533326691258 0.00285057137696
hol 800 30 2.0 0.49676194052 0.000482604461463 0.00314381204871
hol 900 30 2.0 0.502004503363 0.000484738297994 0.00504521907349
hol 1000 30 2.0 0.506668607806 0.000369264340897 0.00242723964773
hol 400 30 2.5 0.469479613617 0.000786160700506 0.00370953357862
hol 500 30 2.5 0.474367512555 0.000662247468613 0.000383191857988
hol 550 30 2.5 0.476755739508 0.00061659303687 0.00115586763405
hol 600 30 2.5 0.478974740733 0.00068483756119 0.00277768117851
hol 700 30 2.5 0.482630416888 0.000605838654519 0.000579247889024
hol 800 30 2.5 0.487633500014 0.000526527767897 0.00190758327274
hol 900 30 2.5 0.492064467979 0.000536355050681 0.00301465611911
hol 1000 30 2.5 0.49608419395 0.000427019205354 0.00127247399491
hol 400 30 3.0 0.466414889278 0.000858689098297 0.0036472153461
hol 500 30 3.0 0.470342293931 0.000706942889544 0.00119517396089
hol 550 30 3.0 0.472232141265 0.000670168417019 0.00130727168392
hol 600 30 3.0 0.473752844953 0.00075172453183 0.0033075369368
hol 700 30 3.0 0.477444622905 0.000654231676795 0.00133395203953
hol 800 30 3.0 0.481760510312 0.000587013125793 0.000872525911631
hol 900 30 3.0 0.485029359912 0.000588536298324 0.00360242858433
hol 1000 30 3.0 0.488162439947 0.000457550715808 0.00143902939705
hol 400 30 4.0 0.461006626135 0.000949735896606 0.00434727879138
hol 500 30 4.0 0.464975575284 0.000799434865374 0.00323774872845
hol 550 30 4.0 0.466056690732 0.000758585829861 0.0024191718015
hol 600 30 4.0 0.467634447841 0.00083734674552 0.00515301500322
hol 700 30 4.0 0.470096265729 0.000745185478553 0.0030189349906
hol 800 30 4.0 0.473501685073 0.000672025072873 0.00115244397113
hol 900 30 4.0 0.476006321851 0.000681091153201 0.00366693077319
hol 1000 30 4.0 0.478715446046 0.000533174987434 0.00343928252241
hol 400 30 5.0 0.456571285781 0.00102285421601 0.00468655530625
hol 500 30 5.0 0.460743649918 0.000865529482761 0.00493872769875
hol 550 30 5.0 0.461558898383 0.000817574803782 0.00363507523707
hol 600 30 5.0 0.463553526386 0.000918473014865 0.00717295916642
hol 700 30 5.0 0.465473179883 0.000822179988642 0.00550411651964
hol 800 30 5.0 0.468264242286 0.000725682034037 0.00369365308156
hol 900 30 5.0 0.470397287276 0.000753242896368 0.00648201657554
hol 1000 30 5.0 0.471904461539 0.000596382745897 0.00480381861205
hol 400 40 0.266 0.628082964629 0.000413222114808 0.0132997329948
hol 500 40 0.266 0.660282102658 0.000278403709424 0.0133029430096
hol 550 40 0.266 0.674882680554 0.000239058802309 0.0139090201988
hol 600 40 0.266 0.688727381485 0.000247919267745 0.0123232550446
hol 700 40 0.266 0.714338484451 0.000192282887065 0.0148454512232
hol 800 40 0.266 0.73693631679 0.000154595439093 0.0140672999942
hol 900 40 0.266 0.757789565633 0.000143909090931 0.0147667227598
hol 1000 40 0.266 0.775972229107 0.000103853793748 0.0167631228227
hol 400 40 0.375 0.551852202367 0.000541779243837 0.00425634130695
hol 500 40 0.375 0.57740119378 0.000385952702153 0.00213622052763
hol 550 40 0.375 0.589533969702 0.000337582152319 0.00104179043067
hol 600 40 0.375 0.601404741575 0.000354551356435 0.0021805764318
hol 700 40 0.375 0.624529581869 0.00027801029047 0.00140888331021
hol 800 40 0.375 0.645869190861 0.000224394308247 0.00267575769359
hol 900 40 0.375 0.666894113961 0.000209656073509 0.00384684021104
hol 1000 40 0.375 0.685569945818 0.000153243747726 0.0069612226693
hol 400 40 0.5 0.519330189983 0.000595832544637 0.00316440630029
hol 500 40 0.5 0.537493450638 0.000440882717208 0.00461411994932
hol 550 40 0.5 0.546501305684 0.000394341999748 0.00394430496738
hol 600 40 0.5 0.555067474583 0.000423847388255 0.00635038378663
hol 700 40 0.5 0.572605285063 0.000344565160579 0.00489585794095
hol 800 40 0.5 0.589478746407 0.000284965182976 0.00471909560181
hol 900 40 0.5 0.606273286504 0.000270117232955 0.00353290997657
hol 1000 40 0.5 0.622122358713 0.000199147715088 0.00448388609969
hol 400 40 0.75 0.493538155394 0.000669782387221 0.00302787851609
hol 500 40 0.75 0.505165787123 0.000511905782952 0.0030900995773
hol 550 40 0.75 0.510816810794 0.000461643701009 0.00262977751493
hol 600 40 0.75 0.516146815287 0.000501361896637 0.00620029675988
hol 700 40 0.75 0.52763097659 0.000420609330605 0.0043817607212
hol 800 40 0.75 0.538452611596 0.000362756818257 0.00602320896581
hol 900 40 0.75 0.549866872476 0.000356180897849 0.00548241822836
hol 1000 40 0.75 0.560308734887 0.000270662439939 0.00623689349653
hol 400 40 1.0 0.482010768221 0.000739610677243 0.00307300242359
hol 500 40 1.0 0.490473711386 0.000567874573651 0.00250544988221
hol 550 40 1.0 0.494650316462 0.000520866519579 0.00229802685289
hol 600 40 1.0 0.498850171838 0.000573721631531 0.00453907245279
hol 700 40 1.0 0.507087948501 0.000482889785398 0.00282443831114
hol 800 40 1.0 0.515177426246 0.000416054965969 0.00456621704882
hol 900 40 1.0 0.523109505525 0.000412758955271 0.00527007699541
hol 1000 40 1.0 0.531541229923 0.000318191413648 0.0054277380213
hol 400 40 1.5 0.471394301299 0.00085239444877 0.00307997478625
hol 500 40 1.5 0.477045030044 0.000667165478081 0.00248786379294
hol 550 40 1.5 0.479911418023 0.000619499008251 0.00120028846276
hol 600 40 1.5 0.482383976765 0.000690561023434 0.00395473049233
hol 700 40 1.5 0.487562754067 0.000588658580089 0.00224323711587
hol 800 40 1.5 0.493332680732 0.0005115718718 0.00256200909276
hol 900 40 1.5 0.498389952396 0.000516392325849 0.00267203668705
hol 1000 40 1.5 0.503360237257 0.000398749034406 0.00295040788858
hol 400 40 2.0 0.465638248208 0.000947273197721 0.000486008034523
hol 500 40 2.0 0.470723876252 0.000753567415901 0.000828269698286
hol 550 40 2.0 0.472309040565 0.000704163314686 0.000152791308857
hol 600 40 2.0 0.474393629096 0.000770997781794 0.00284054095525
hol 700 40 2.0 0.478441279624 0.00066594274594 0.00203224797979
hol 800 40 2.0 0.482455897202 0.000597941253053 0.00226875721607
hol 900 40 2.0 0.48660237467 0.000600986602556 0.00143951847134
hol 1000 40 2.0 0.489886054396 0.000459762808662 0.00368492540904
hol 400 40 2.5 0.46221852836 0.00102206594915 0.00394398232484
hol 500 40 2.5 0.465944587086 0.000829059417351 0.00310638359864
hol 550 40 2.5 0.467502435179 0.000767783175232 0.00285171171348
hol 600 40 2.5 0.469768332213 0.000848133814596 0.00129802833229
hol 700 40 2.5 0.472735216275 0.000744907511979 0.00113188284547
hol 800 40 2.5 0.475943442748 0.000647309788183 0.000730520135045
hol 900 40 2.5 0.479080570136 0.000660942970958 0.000591738697483
hol 1000 40 2.5 0.481993667968 0.000523965134179 0.00171591280651
hol 400 40 3.0 0.459433820957 0.00110308402951 0.00334242616386
hol 500 40 3.0 0.463181977827 0.000885466599962 0.00135047511517
hol 550 40 3.0 0.464932993147 0.000826319645695 0.00199670546396
hol 600 40 3.0 0.465923600977 0.000920423103909 0.00476215186994
hol 700 40 3.0 0.468466266368 0.000798433970921 0.000367262757728
hol 800 40 3.0 0.471438608314 0.0007151095997 0.000648881945418
hol 900 40 3.0 0.474122153563 0.000716535726249 0.00125705485047
hol 1000 40 3.0 0.47629998012 0.000558582028304 0.00221102656521
hol 400 40 4.0 0.456060116672 0.00120306941467 0.0063617408564
hol 500 40 4.0 0.458901008388 0.000985443929245 0.00303956929621
hol 550 40 4.0 0.460312178419 0.0009218869035 0.00356223413836
hol 600 40 4.0 0.461429713847 0.00102107150618 0.00146268792812
hol 700 40 4.0 0.463034865667 0.000900582877636 0.00246666539198
hol 800 40 4.0 0.4653101499 0.000805675219761 0.00123785618506
hol 900 40 4.0 0.467118687651 0.000816464306274 0.00180155929103
hol 1000 40 4.0 0.46939128473 0.000641337271125 0.00530278127707
hol 400 40 5.0 0.45184827325 0.00128904685079 0.00623832972311
hol 500 40 5.0 0.455171621156 0.0010599270751 0.00363556639684
hol 550 40 5.0 0.456236637991 0.000986925571422 0.00411785593295
hol 600 40 5.0 0.457156945744 0.00110450672511 0.00239341876939
hol 700 40 5.0 0.459550519024 0.000975637308423 0.0056080527702
hol 800 40 5.0 0.461211133628 0.00086650839608 0.00379709811106
hol 900 40 5.0 0.462640969687 0.000893392042654 0.00529982671133
hol 1000 40 5.0 0.463928866436 0.000705035064773 0.0066429659689
hol 400 50 0.266 0.594830220426 0.000612980027192 0.0121270522005
hol 500 50 0.266 0.623742695474 0.000401896100874 0.0126182439958
hol 550 50 0.266 0.637036379327 0.00034098116673 0.0132187327114
hol 600 50 0.266 0.649474412114 0.000349810263746 0.0120371524968
hol 700 50 0.266 0.673476541819 0.000265808826926 0.0136375609888
hol 800 50 0.266 0.695092759608 0.000210550012187 0.0138963670492
hol 900 50 0.266 0.714898702314 0.000195196339761 0.0140177088616
hol 1000 50 0.266 0.733094741726 0.000141238061137 0.0173765593989
hol 400 50 0.375 0.526067091893 0.000768574831853 0.00246653497047
hol 500 50 0.375 0.546784648244 0.000537485756228 0.00288211457936
hol 550 50 0.375 0.556858920161 0.000467713952874 0.00267786102055
hol 600 50 0.375 0.566916293637 0.000488971559136 0.00374961590504
hol 700 50 0.375 0.586811288287 0.000380331796965 0.00131250698403
hol 800 50 0.375 0.605468924975 0.000304397814728 0.000848684701855
hol 900 50 0.375 0.623683086315 0.000282517762574 0.0019674582005
hol 1000 50 0.375 0.64086234832 0.00020465641921 0.00442763138584
hol 400 50 0.5 0.500683767614 0.000821640562849 0.0038585444961
hol 500 50 0.5 0.515242719929 0.000591915371752 0.00305938028396
hol 550 50 0.5 0.522072925617 0.000526141828062 0.00370185767739
hol 600 50 0.5 0.529255564351 0.000561920546349 0.00460505450164
hol 700 50 0.5 0.542950438768 0.000455553021993 0.00539082847626
hol 800 50 0.5 0.556540447058 0.000376330105841 0.0058908455939
hol 900 50 0.5 0.57022574113 0.000356725187 0.00611481442982
hol 1000 50 0.5 0.58368816903 0.00026203026158 0.0060945085722
hol 400 50 0.75 0.480996525216 0.000894093316687 0.00634203623485
hol 500 50 0.75 0.490143952302 0.0006628511927 0.00238823096365
hol 550 50 0.75 0.494476511215 0.000593831020025 0.00275482223362
hol 600 50 0.75 0.499230303092 0.000640188751563 0.00411646621135
hol 700 50 0.75 0.508066976445 0.000533597801543 0.00378946489964
hol 800 50 0.75 0.516521205191 0.000458322711635 0.00518879070547
hol 900 50 0.75 0.524986625931 0.000451135613906 0.00613355278467
hol 1000 50 0.75 0.533456160298 0.000343509906704 0.00631649715534
hol 400 50 1.0 0.472066863091 0.000964620370606 0.00296630013385
hol 500 50 1.0 0.479218955752 0.000721138285498 0.00127986892923
hol 550 50 1.0 0.482808860204 0.000654754881293 0.00198848883392
hol 600 50 1.0 0.486014879348 0.000715158811737 0.00310171242208
hol 700 50 1.0 0.492199451036 0.000599479259938 0.00297756752329
hol 800 50 1.0 0.49849512267 0.000515259651928 0.00447226860398
hol 900 50 1.0 0.504947192665 0.000511162193907 0.00449588805149
hol 1000 50 1.0 0.511056326059 0.000394532188887 0.00352700368609
hol 400 50 1.5 0.463303048601 0.00109334656784 0.00194721708492
hol 500 50 1.5 0.468767062165 0.000833132060691 0.00111203983798
hol 550 50 1.5 0.471184176611 0.000764096442022 0.00205028447428
hol 600 50 1.5 0.473611589461 0.000840311806023 0.00345261942699
hol 700 50 1.5 0.477557083796 0.000711979108247 0.00153387107774
hol 800 50 1.5 0.481644600803 0.000618310948445 0.00287189599012
hol 900 50 1.5 0.4857764377 0.000622391866362 0.00268568324998
hol 1000 50 1.5 0.489622035348 0.000480613904867 0.00312455137437
hol 400 50 2.0 0.459552388211 0.0012051503735 0.00241333214787
hol 500 50 2.0 0.463592174745 0.000932592950008 0.000399263019293
hol 550 50 2.0 0.465093265352 0.000858628894471 0.00153341440867
hol 600 50 2.0 0.467082019501 0.000933953896445 0.00154117837004
hol 700 50 2.0 0.470433705427 0.000800180106313 0.000620162992539
hol 800 50 2.0 0.473636793239 0.000708870878347 0.000980848826094
hol 900 50 2.0 0.476259241307 0.000712541802285 0.00196581646588
hol 1000 50 2.0 0.479183906948 0.000546544032779 0.00135472814344
hol 400 50 2.5 0.456185069871 0.00130568455463 0.00302988393792
hol 500 50 2.5 0.459866042749 0.00101748428623 0.00188058472741
hol 550 50 2.5 0.461760576656 0.000929675571179 0.00337697957167
hol 600 50 2.5 0.463066166228 0.0010239169043 0.00140582210664
hol 700 50 2.5 0.466394525359 0.000883119918362 0.00157485778384
hol 800 50 2.5 0.468309280029 0.000768697798772 0.00184057709252
hol 900 50 2.5 0.470679442058 0.000780546483824 0.00250522762075
hol 1000 50 2.5 0.473394861307 0.000613663239957 0.00366312232696
hol 400 50 3.0 0.454155491833 0.00139108829595 0.00316010432585
hol 500 50 3.0 0.457804909181 0.00107907503728 0.00292733592056
hol 550 50 3.0 0.458840316373 0.000996474056555 0.00169489547539
hol 600 50 3.0 0.460510827685 0.00109816109282 0.00238198808335
hol 700 50 3.0 0.462690523169 0.000945684664693 0.00247324682894
hol 800 50 3.0 0.464521391083 0.00084115936978 0.000549667742775
hol 900 50 3.0 0.46659898508 0.000841741794709 0.00275554741394
hol 1000 50 3.0 0.468789509309 0.000655577556621 0.00242566510985
hol 400 50 4.0 0.450252311671 0.00151384655005 0.00248689829323
hol 500 50 4.0 0.453926279764 0.00119504163549 0.00314343315654
hol 550 50 4.0 0.455121640187 0.00109877290039 0.0031749412223
hol 600 50 4.0 0.456554361831 0.00121064929047 0.00818676728148
hol 700 50 4.0 0.458289137781 0.00105362001088 0.00274695067119
hol 800 50 4.0 0.459864826122 0.000935775206969 0.00215050301222
hol 900 50 4.0 0.461196431823 0.000947464193152 0.00378491211965
hol 1000 50 4.0 0.4628320775 0.000743449102736 0.00467859952589
hol 400 50 5.0 0.447304788274 0.00159413370711 0.00503260699935
hol 500 50 5.0 0.450508505152 0.00126256236351 0.00333340590423
hol 550 50 5.0 0.451725781704 0.00116249192764 0.00403715916646
hol 600 50 5.0 0.45277234553 0.00128977789977 0.0040927749146
hol 700 50 5.0 0.454696205692 0.00112536917444 0.00450573884
hol 800 50 5.0 0.456284563932 0.000998078673345 0.00422289715978
hol 900 50 5.0 0.45716337537 0.00101974140136 0.00404186116183
hol 1000 50 5.0 0.458362430337 0.000803026931718 0.0069023253637
hol 400 60 0.266 0.569748173861 0.000860041484087 0.0105243435798
hol 500 60 0.266 0.596966720558 0.00055410442879 0.0114731398651
hol 550 60 0.266 0.609202754515 0.000467552197647 0.0125473729957
hol 600 60 0.266 0.620630237156 0.000476361560181 0.0120402260707
hol 700 60 0.266 0.643073165933 0.000355899766754 0.0131352691043
hol 800 60 0.266 0.66305548128 0.000279013432637 0.0130260655177
hol 900 60 0.266 0.681794237654 0.000255642554609 0.0134709984922
hol 1000 60 0.266 0.699127988166 0.000183501208495 0.0171414323661
hol 400 60 0.375 0.507282691397 0.00103555097049 0.0028677857193
hol 500 60 0.375 0.526092773441 0.000710075226161 0.00330093064537
hol 550 60 0.375 0.534792792581 0.000614956009948 0.00373165492731
hol 600 60 0.375 0.543285657199 0.000640747653548 0.00308650250241
hol 700 60 0.375 0.5606313986 0.000496233831985 0.00264426792688
hol 800 60 0.375 0.576557071142 0.000396575384865 0.00256247226536
hol 900 60 0.375 0.592742381905 0.000366306790332 0.00187047269713
hol 1000 60 0.375 0.6082266166 0.000264239180803 0.00245189138907
hol 400 60 0.5 0.486975150121 0.00108536557715 0.000980391577672
hol 500 60 0.5 0.499673031602 0.00076334461363 0.00382227020622
hol 550 60 0.5 0.505775506955 0.000671284423384 0.00313038671897
hol 600 60 0.5 0.511818902078 0.000711827297462 0.00378708326668
hol 700 60 0.5 0.523411064675 0.000572241980172 0.00520547819949
hol 800 60 0.5 0.53461899935 0.000472352542432 0.00628217109379
hol 900 60 0.5 0.545939873524 0.000448441013368 0.00661267042321
hol 1000 60 0.5 0.557441333301 0.000329844677382 0.0064910912882
hol 400 60 0.75 0.471041370961 0.00116406165927 0.00132916353444
hol 500 60 0.75 0.47957267896 0.000833951510143 0.00252930521289
hol 550 60 0.75 0.483590278198 0.0007388733209 0.00205922495019
hol 600 60 0.75 0.487170486797 0.000791395590193 0.00341286068048
hol 700 60 0.75 0.495004398706 0.000650544556971 0.00352547249362
hol 800 60 0.75 0.501618212378 0.000554108092164 0.00528604974583
hol 900 60 0.75 0.508984455285 0.000543462568509 0.00534069534281
hol 1000 60 0.75 0.516049993122 0.000413165392264 0.00438628567239
hol 400 60 1.0 0.464179842258 0.00123273536397 0.000821993228899
hol 500 60 1.0 0.470747173721 0.000894405435857 0.001895162252
hol 550 60 1.0 0.473900958258 0.000802348006246 0.00158868889417
hol 600 60 1.0 0.476851715742 0.000867110121236 0.00163022320283
hol 700 60 1.0 0.482255060945 0.000718474547143 0.00262705527538
hol 800 60 1.0 0.487932445889 0.000612594821352 0.00246036437945
hol 900 60 1.0 0.49284224529 0.000606232422119 0.00378585885437
hol 1000 60 1.0 0.497861927477 0.000466624751552 0.0052632916212
hol 400 60 1.5 0.457075724433 0.00137017941778 0.00111902755636
hol 500 60 1.5 0.462160496569 0.00101881548314 0.000648795079586
hol 550 60 1.5 0.464697088899 0.000920550759271 0.00183199164434
hol 600 60 1.5 0.466745822924 0.00100226549567 0.000798933582804
hol 700 60 1.5 0.470592041566 0.000839024884669 0.00108517685965
hol 800 60 1.5 0.473742320055 0.000724680662053 0.00241687885044
hol 900 60 1.5 0.477238636212 0.000724341677818 0.00293745642031
hol 1000 60 1.5 0.480448072395 0.000558096730587 0.00332270748182
hol 400 60 2.0 0.453673590001 0.00151179891122 0.00231726655575
hol 500 60 2.0 0.457712486308 0.00113088599384 0.00150137358945
hol 550 60 2.0 0.459748516271 0.0010271195308 0.000976791692315
hol 600 60 2.0 0.461695702521 0.00111102492591 0.00305358114083
hol 700 60 2.0 0.46422971025 0.000940032875985 0.00124949656367
hol 800 60 2.0 0.46704600537 0.000821559525083 0.00157753977998
hol 900 60 2.0 0.46996273474 0.0008195504504 0.00295181545541
hol 1000 60 2.0 0.472180228065 0.000629779800316 0.0008294289448
hol 400 60 2.5 0.451282383478 0.00163323616421 0.00269232119018
hol 500 60 2.5 0.455087049763 0.00122702812289 0.00516822294734
hol 550 60 2.5 0.457201466927 0.00110736265667 0.00205787908784
hol 600 60 2.5 0.458181327006 0.00121033901773 0.00244158473059
hol 700 60 2.5 0.460273099584 0.00103021021806 0.00204217923361
hol 800 60 2.5 0.462950042872 0.000889186567874 0.00215557269548
hol 900 60 2.5 0.465215856989 0.000895877304469 0.00360865382175
hol 1000 60 2.5 0.467042110006 0.000700264699432 0.00235365876238
hol 400 60 3.0 0.449466898195 0.00172556548507 0.00992635123008
hol 500 60 3.0 0.453047852142 0.00130383788323 0.00153547785631
hol 550 60 3.0 0.454531741222 0.00118669899282 0.00192980303528
hol 600 60 3.0 0.455578786749 0.00129571095901 0.00227593857038
hol 700 60 3.0 0.457912841358 0.00109967163641 0.00327744383457
hol 800 60 3.0 0.459864830075 0.000964432368375 0.00219898689782
hol 900 60 3.0 0.461353607108 0.000963492159248 0.00101449785435
hol 1000 60 3.0 0.463377530574 0.000748379929243 0.00287133817818
hol 400 60 4.0 0.446274190357 0.00186570263841 0.00821528340031
hol 500 60 4.0 0.450123821514 0.00141893978421 0.00381808591048
hol 550 60 4.0 0.451197217079 0.00129910139368 0.0039034347803
hol 600 60 4.0 0.452200899103 0.00141381742109 0.0027685190292
hol 700 60 4.0 0.454230300383 0.00121252901199 0.00288489391181
hol 800 60 4.0 0.455638060532 0.00106566166194 0.0021487941838
hol 900 60 4.0 0.456948946047 0.00107293583311 0.00200931063834
hol 1000 60 4.0 0.458126365819 0.000838641335845 0.00477507627554
hol 400 60 5.0 0.44291144882 0.00195247686332 0.00971365972772
hol 500 60 5.0 0.447163086262 0.00147326191959 0.00518253332695
hol 550 60 5.0 0.44757814698 0.0013417705435 0.00481291234139
hol 600 60 5.0 0.449137110588 0.00146451558991 0.00647160991474
hol 700 60 5.0 0.450756774929 0.00126212094547 0.0049615398804
hol 800 60 5.0 0.451717073252 0.00111341943494 0.0051377904583
hol 900 60 5.0 0.452832700749 0.00112829614969 0.00541250971583
hol 1000 60 5.0 0.453942505187 0.000885295101993 0.00639485288179
hol 400 70 0.266 0.550661915706 0.0011431388213 0.0110708494388
hol 500 70 0.266 0.575649589245 0.000736756410367 0.00997430353223
hol 550 70 0.266 0.587251899949 0.000618293889384 0.0115675723085
hol 600 70 0.266 0.597946341191 0.000627878178252 0.0119384619489
hol 700 70 0.266 0.619082504012 0.000465726165295 0.0124664224972
hol 800 70 0.266 0.637839441557 0.000360534052426 0.0128484616889
hol 900 70 0.266 0.655369284051 0.000327479647097 0.0130307487159
hol 1000 70 0.266 0.671908299171 0.000232893390001 0.0164636417368
hol 400 70 0.375 0.494122367318 0.00133413482523 0.00443366242137
hol 500 70 0.375 0.510721988336 0.000905394759712 0.00310041445849
hol 550 70 0.375 0.518285291754 0.000780560460615 0.00280950351409
hol 600 70 0.375 0.526016841313 0.000809614442581 0.00254863827543
hol 700 70 0.375 0.541108271672 0.000625346159329 0.00322859037708
hol 800 70 0.375 0.55527857438 0.000498692582769 0.00352302236608
hol 900 70 0.375 0.569454480629 0.000460434951017 0.00331015690065
hol 1000 70 0.375 0.583463335724 0.000331271419296 0.00263334253058
hol 400 70 0.5 0.476144872685 0.00139435071234 0.00241156958757
hol 500 70 0.5 0.488053919169 0.000956211125003 0.00401470675746
hol 550 70 0.5 0.493589855844 0.000834076095118 0.00261113643686
hol 600 70 0.5 0.499299813016 0.000877489213665 0.00268056589324
hol 700 70 0.5 0.509567999473 0.00069741976529 0.00482215193316
hol 800 70 0.5 0.518846573268 0.000573198857625 0.00608966711389
hol 900 70 0.5 0.528771319612 0.00054401647756 0.00635299016005
hol 1000 70 0.5 0.538399135185 0.000400704096676 0.00517018604025
hol 400 70 0.75 0.463742204976 0.00146616226445 0.00216992012864
hol 500 70 0.75 0.471092787781 0.0010306083709 0.00244008093558
hol 550 70 0.75 0.475236980467 0.000902462577316 0.00267043698075
hol 600 70 0.75 0.478995089504 0.000957321809763 0.00129261774106
hol 700 70 0.75 0.485116122702 0.000775849768973 0.00396053139686
hol 800 70 0.75 0.49144544305 0.000652996697921 0.00409258337765
hol 900 70 0.75 0.49737896132 0.000636630012955 0.00566589854584
hol 1000 70 0.75 0.503593430449 0.000482063114479 0.00559048375275
hol 400 70 1.0 0.456823008799 0.00154682682449 0.00145928113422
hol 500 70 1.0 0.463739433674 0.00109456271788 0.00200571604288
hol 550 70 1.0 0.467428886264 0.000965600097167 0.00138084248039
hol 600 70 1.0 0.470016469622 0.00103390800561 0.000476655556413
hol 700 70 1.0 0.474453936668 0.000846111775846 0.00303127625656
hol 800 70 1.0 0.479337047755 0.000715590187478 0.00271109822974
hol 900 70 1.0 0.483939220115 0.000702249771448 0.00383185388436
hol 1000 70 1.0 0.488332089257 0.000537107439959 0.00316799667753
hol 400 70 1.5 0.451185237054 0.00169303569997 0.00154449841369
hol 500 70 1.5 0.456640372337 0.00122370885986 0.00106784476563
hol 550 70 1.5 0.458946705009 0.0010952826855 0.000194226680431
hol 600 70 1.5 0.460833636647 0.00117921796812 0.000966016658744
hol 700 70 1.5 0.465068370263 0.000974523107845 0.00110276175894
hol 800 70 1.5 0.468037812374 0.000834783677515 0.00218132977252
hol 900 70 1.5 0.471190119663 0.000827091721649 0.00184808335211
hol 1000 70 1.5 0.474052540693 0.00063423839505 0.00232760813383
hol 400 70 2.0 0.448055520164 0.00185182846631 0.00136306684401
hol 500 70 2.0 0.452985022143 0.0013574292451 0.0028346561912
hol 550 70 2.0 0.455604469949 0.0012120983506 0.0023955469787
hol 600 70 2.0 0.457016507175 0.00130427565538 0.00191684955406
hol 700 70 2.0 0.459517208159 0.00108923162552 0.00173186052639
hol 800 70 2.0 0.462276651938 0.000937723148028 0.00178290798646
hol 900 70 2.0 0.464424196997 0.000930987838119 0.00406155131042
hol 1000 70 2.0 0.466835137736 0.000712378153773 0.00125786572096
hol 400 70 2.5 0.445521960121 0.00200654681878 0.00363058865958
hol 500 70 2.5 0.44997442901 0.00146750097995 0.00348289172186
hol 550 70 2.5 0.452237053387 0.00131245658391 0.00321703986341
hol 600 70 2.5 0.454489843651 0.00141358861957 0.00270702388468
hol 700 70 2.5 0.456650234854 0.00118379583728 0.000670768132296
hol 800 70 2.5 0.458667092933 0.00101604992744 0.00290141012198
hol 900 70 2.5 0.460150807356 0.00101526161395 0.00440298177778
hol 1000 70 2.5 0.462614586631 0.000785616439797 0.00411373399557
hol 400 70 3.0 0.443949116987 0.00211504553715 0.00306849515188
hol 500 70 3.0 0.448260055631 0.00155273891125 0.00372937183934
hol 550 70 3.0 0.450397400647 0.00139700283327 0.00312032716989
hol 600 70 3.0 0.451348366592 0.00151440424961 0.00133855083951
hol 700 70 3.0 0.453683388692 0.0012623250241 0.00441266918283
hol 800 70 3.0 0.455710680633 0.0010932807621 0.000853898130643
hol 900 70 3.0 0.457303318285 0.0010850334957 0.00486412333082
hol 1000 70 3.0 0.459052925113 0.000840396254496 0.00262551290071
hol 400 70 4.0 0.441219905213 0.00226637263287 0.00373049242382
hol 500 70 4.0 0.445670149546 0.0016721419298 0.0035069254832
hol 550 70 4.0 0.447847537578 0.00149561207054 0.00634867621168
hol 600 70 4.0 0.448404983548 0.00162666145764 0.00297296339061
hol 700 70 4.0 0.449790844631 0.00137903843343 0.00117045567321
hol 800 70 4.0 0.451921645202 0.00119064414275 0.00319888920997
hol 900 70 4.0 0.452848485377 0.00119597036353 0.00137699621087
hol 1000 70 4.0 0.454644760685 0.000927518583549 0.00509667620534
hol 400 70 5.0 0.43747498177 0.00236173298716 0.00508334161031
hol 500 70 5.0 0.442774420103 0.00171877575019 0.00543426161254
hol 550 70 5.0 0.443529912515 0.00154921065004 0.0055239499089
hol 600 70 5.0 0.444558786834 0.00165700818582 0.0042242545062
hol 700 70 5.0 0.446893385904 0.00140579119517 0.00443497795355
hol 800 70 5.0 0.448226377595 0.00121826097479 0.00380443358425
hol 900 70 5.0 0.448848420588 0.0012227964971 0.00320958782799
hol 1000 70 5.0 0.449913581879 0.000954609136523 0.00641518819467
hol 400 80 0.266 0.53381835054 0.00148395994751 0.00845860546529
hol 500 80 0.266 0.558411247676 0.000943933517412 0.00935194962477
hol 550 80 0.266 0.569076076199 0.000793968121064 0.0098408787473
hol 600 80 0.266 0.580133624251 0.000801220109196 0.0121818480048
hol 700 80 0.266 0.599407992335 0.000592494648781 0.0116560371095
hol 800 80 0.266 0.617040414047 0.000456093395248 0.012464514159
hol 900 80 0.266 0.633729920294 0.000411094482784 0.0126642715339
hol 1000 80 0.266 0.649428358338 0.000290206973793 0.0156912154712
hol 400 80 0.375 0.481800434671 0.00169116078153 0.00111625091495
hol 500 80 0.375 0.49778657653 0.00112552809565 0.00363522148269
hol 550 80 0.375 0.505190606508 0.000965820262669 0.00269152045949
hol 600 80 0.375 0.512473143139 0.000998233189289 0.00605290863863
hol 700 80 0.375 0.525506765 0.000769355657783 0.00478107482448
hol 800 80 0.375 0.538827049536 0.000611103853928 0.00438290976302
hol 900 80 0.375 0.551454230353 0.00056349361466 0.00416152950867
hol 1000 80 0.375 0.564110804204 0.000404847941124 0.0028141327029
hol 400 80 0.5 0.466237757545 0.00174933038193 0.00156154860857
hol 500 80 0.5 0.478993211245 0.00117757740279 0.00196207610426
hol 550 80 0.5 0.484110216763 0.00101673747382 0.00281921523395
hol 600 80 0.5 0.488852036592 0.00106198737025 0.00352020730326
hol 700 80 0.5 0.498385898762 0.000836997772301 0.00437902962884
hol 800 80 0.5 0.507114806942 0.000681917292499 0.00487215806187
hol 900 80 0.5 0.515899474079 0.000644432216811 0.00536400387704
hol 1000 80 0.5 0.52439903738 0.000474128965794 0.00497033095051
hol 400 80 0.75 0.455139780487 0.00183240220525 0.00112780259881
hol 500 80 0.75 0.464697484202 0.00124717811338 0.00169036604511
hol 550 80 0.75 0.467640126557 0.00109135024709 0.00225021474545
hol 600 80 0.75 0.471199899177 0.00114479776451 0.00132639385697
hol 700 80 0.75 0.477562536711 0.00091407523223 0.00330738181497
hol 800 80 0.75 0.483485267145 0.000759398975301 0.00334329273599
hol 900 80 0.75 0.488682084053 0.000735014945828 0.00444094764187
hol 1000 80 0.75 0.494110716452 0.000553268057033 0.00491795347749
hol 400 80 1.0 0.449892830862 0.00191671041903 0.000956135960169
hol 500 80 1.0 0.457447717617 0.00132164030351 0.0018554451374
hol 550 80 1.0 0.461016710949 0.00115416745605 0.000987328013967
hol 600 80 1.0 0.463310526992 0.00122733825958 0.00301195665481
hol 700 80 1.0 0.468580887448 0.000987394911067 0.00246564413576
hol 800 80 1.0 0.472770231853 0.00082595351923 0.00335288709394
hol 900 80 1.0 0.476642385566 0.000803590288142 0.00379237296306
hol 1000 80 1.0 0.481225030833 0.000610022775114 0.00225896310907
hol 400 80 1.5 0.445203249958 0.00206341761689 0.00451761694525
hol 500 80 1.5 0.452014880466 0.00145441127307 0.000789736528002
hol 550 80 1.5 0.454291835457 0.0012895339186 0.00145208013102
hol 600 80 1.5 0.456048691242 0.001382358569 0.00104178753752
hol 700 80 1.5 0.459912397102 0.00112575165084 0.00265956780239
hol 800 80 1.5 0.462861845238 0.000953752639361 0.0021913490344
hol 900 80 1.5 0.465927073268 0.000936361874051 0.00229383153744
hol 1000 80 1.5 0.468646190374 0.000713448379595 0.00233784212163
hol 400 80 2.0 0.443394444887 0.00223572045793 0.00641511310053
hol 500 80 2.0 0.448894494821 0.00159744133387 0.000926602263657
hol 550 80 2.0 0.450573579033 0.00142720486389 0.00432400598127
hol 600 80 2.0 0.452267955426 0.00152532860102 0.00216284844069
hol 700 80 2.0 0.455422380975 0.00125028288002 0.00129203191394
hol 800 80 2.0 0.458182768347 0.00106464694885 0.000934282906231
hol 900 80 2.0 0.460254894211 0.0010477867237 0.00266296786414
hol 1000 80 2.0 0.462345110074 0.000798443313549 0.0014363299143
hol 400 80 2.5 0.440489754615 0.00241556376653 0.00215677100905
hol 500 80 2.5 0.445943688976 0.00173688969219 0.00685861773553
hol 550 80 2.5 0.448271006245 0.00153477579923 0.00163097956821
hol 600 80 2.5 0.449910250548 0.00164492285135 0.00107966733913
hol 700 80 2.5 0.452682838455 0.00135725162576 0.000681031909411
hol 800 80 2.5 0.454978820202 0.0011493429006 0.00461409185453
hol 900 80 2.5 0.45691976274 0.0011356500077 0.00221518175117
hol 1000 80 2.5 0.458174303413 0.000875091078139 0.00183422898484
hol 400 80 3.0 0.43913906708 0.00253637683398 0.00350026512165
hol 500 80 3.0 0.444301208505 0.00182674497785 0.00207279497989
hol 550 80 3.0 0.446464341621 0.00162583030228 0.00316589814479
hol 600 80 3.0 0.447890526033 0.00173768872582 0.00305259696354
hol 700 80 3.0 0.450606534683 0.00143486986847 0.000904722027804
hol 800 80 3.0 0.452636281828 0.00122533206915 0.000725783174286
hol 900 80 3.0 0.453823759781 0.00121161010444 0.00421540841417
hol 1000 80 3.0 0.456075438757 0.000930882223715 0.00359851491319
hol 400 80 4.0 0.435357027035 0.00274347784208 0.00312585668779
hol 500 80 4.0 0.441701966702 0.00194568079081 0.00278823260761
hol 550 80 4.0 0.443611919539 0.00173369630179 0.00507683367686
hol 600 80 4.0 0.444677166902 0.00185716946633 0.00388219788797
hol 700 80 4.0 0.447075388642 0.00153973804353 0.00572041838857
hol 800 80 4.0 0.448371158414 0.0013229558648 0.00115422781079
hol 900 80 4.0 0.45016673061 0.0013090263769 0.0029364408603
hol 1000 80 4.0 0.451069365079 0.00101307950581 0.00429539523543
hol 400 80 5.0 0.432136122088 0.00288474843766 0.00570902516839
hol 500 80 5.0 0.43735371694 0.00200443351649 0.00561785687917
hol 550 80 5.0 0.439363255852 0.00176502594858 0.00537912130637
hol 600 80 5.0 0.440977729525 0.00188334229132 0.00760764558529
hol 700 80 5.0 0.443178981818 0.00154859393766 0.00909179191681
hol 800 80 5.0 0.444152937424 0.00133354976502 0.0048938904971
hol 900 80 5.0 0.445439885717 0.00132350524399 0.0052890060224
hol 1000 80 5.0 0.446893677581 0.0010186538418 0.00661331125899
hol 400 90 0.266 0.51920483172 0.0018437669857 0.00858038262915
hol 500 90 0.266 0.543849752734 0.00116514988182 0.00993864423146
hol 550 90 0.266 0.553931392009 0.000980609652094 0.00978808160256
hol 600 90 0.266 0.564288474979 0.000989442835472 0.0111001926018
hol 700 90 0.266 0.582817813275 0.000728605966237 0.0105499212427
hol 800 90 0.266 0.600187606384 0.000557387462616 0.0123734293384
hol 900 90 0.266 0.615521940797 0.000498869086261 0.0122556949146
hol 1000 90 0.266 0.630561607442 0.000349299628595 0.0148475945928
hol 400 90 0.375 0.47234152463 0.00206485979866 0.00449813561393
hol 500 90 0.375 0.487137432393 0.00136203803537 0.00336790515374
hol 550 90 0.375 0.49448660751 0.00115956037944 0.00449723452827
hol 600 90 0.375 0.501044350866 0.00119410910688 0.00202534500932
hol 700 90 0.375 0.513411519474 0.000915181849498 0.00461262387895
hol 800 90 0.375 0.525221922328 0.00072492166004 0.00460713186109
hol 900 90 0.375 0.536820004431 0.00066659501578 0.00461420853535
hol 1000 90 0.375 0.548728906892 0.000477049367561 0.00443426514768
hol 400 90 0.5 0.458232784649 0.00213148373872 0.00439841749714
hol 500 90 0.5 0.470977622957 0.00140929971663 0.00471884718235
hol 550 90 0.5 0.47582535853 0.0012115683286 0.00344608450069
hol 600 90 0.5 0.48038904889 0.00125744624853 0.00182316668165
hol 700 90 0.5 0.489362499971 0.000978352127155 0.00382393152307
hol 800 90 0.5 0.497139574443 0.000791710590863 0.00578776084475
hol 900 90 0.5 0.505310025972 0.000743783188718 0.00541493218743
hol 1000 90 0.5 0.512966356774 0.000545094202511 0.00480177208058
hol 400 90 0.75 0.448217879131 0.00223126120142 0.000947472605759
hol 500 90 0.75 0.457919298057 0.00148829960877 0.00257943086473
hol 550 90 0.75 0.461982346664 0.00128354388654 0.00332897520729
hol 600 90 0.75 0.465187691824 0.00134286280041 0.00376688089692
hol 700 90 0.75 0.471552600845 0.00105896463014 0.00328026170112
hol 800 90 0.75 0.477392428178 0.000867396929381 0.00350448894956
hol 900 90 0.75 0.481667595635 0.000830812005706 0.00374383228211
hol 1000 90 0.75 0.486316772644 0.000621376850423 0.00262898574052
hol 400 90 1.0 0.443518346073 0.00232227959013 0.000933878100194
hol 500 90 1.0 0.452237978233 0.00156073516243 0.00241780395848
hol 550 90 1.0 0.456136637733 0.00135027375369 0.00529525376196
hol 600 90 1.0 0.457895417395 0.00142685811454 0.00244949531313
hol 700 90 1.0 0.463453361778 0.00113248036663 0.00228322804428
hol 800 90 1.0 0.467682489146 0.000935373563682 0.00262239730922
hol 900 90 1.0 0.471565503576 0.000901662878366 0.00249546276076
hol 1000 90 1.0 0.475348934632 0.000679662928299 0.00180462408682
hol 400 90 1.5 0.439730266015 0.00246099739376 0.00535996487274
hol 500 90 1.5 0.446567529976 0.00170443812351 0.00225133194069
hol 550 90 1.5 0.44970018298 0.00149638792893 0.00283218204289
hol 600 90 1.5 0.451491168677 0.0015845568157 0.000509066180718
hol 700 90 1.5 0.455681842675 0.00127831270462 0.00110723896634
hol 800 90 1.5 0.458248366394 0.00107160700823 0.00329480107017
hol 900 90 1.5 0.461494065083 0.00104456333015 0.00139350456323
hol 1000 90 1.5 0.464105274541 0.000788982128884 0.00278152496146
hol 400 90 2.0 0.436420162313 0.00268296051047 0.0020920286515
hol 500 90 2.0 0.443432821832 0.00187292570783 0.00187564876035
hol 550 90 2.0 0.446026952956 0.00164948195695 0.00248558871966
hol 600 90 2.0 0.448477475878 0.00174389175624 0.00333136972599
hol 700 90 2.0 0.451906949102 0.00141802317939 0.00282854736257
hol 800 90 2.0 0.45402817591 0.00119551554622 0.00355830388433
hol 900 90 2.0 0.45606732076 0.00116299100409 0.0032015140016
hol 1000 90 2.0 0.458385568195 0.000880324450742 0.00524945097111
hol 400 90 2.5 0.434346979571 0.00290981250369 0.00493763197017
hol 500 90 2.5 0.442102255317 0.00201231222195 0.00175820222028
hol 550 90 2.5 0.444271583237 0.00177459662117 0.00221817423765
hol 600 90 2.5 0.446047111222 0.00187977457134 0.00506975427592
hol 700 90 2.5 0.448998300918 0.00153192145955 0.00184928417294
hol 800 90 2.5 0.45114492911 0.00128794494219 0.000345134439298
hol 900 90 2.5 0.453349002657 0.00126109283285 0.000136765587889
hol 1000 90 2.5 0.455374887617 0.000957304024503 0.00266915022408
hol 400 90 3.0 0.433299284022 0.00309024624065 0.00363532625702
hol 500 90 3.0 0.440014219129 0.00212509194163 0.00787309723755
hol 550 90 3.0 0.442410856442 0.00187318936738 0.00354737205824
hol 600 90 3.0 0.444627669918 0.00198828181799 0.00415700407254
hol 700 90 3.0 0.447620104369 0.00160918699088 0.00328476725682
hol 800 90 3.0 0.449154841113 0.00136372415248 0.000711012715558
hol 900 90 3.0 0.451379747401 0.00133233753929 0.00207217815483
hol 1000 90 3.0 0.452374549207 0.00101761820106 0.00273709211935
hol 400 90 4.0 0.431656039818 0.00322721413511 0.00735323740494
hol 500 90 4.0 0.437368749504 0.00224731435052 0.00615590186895
hol 550 90 4.0 0.439012111371 0.0019810072109 0.00399675987861
hol 600 90 4.0 0.440431623873 0.00212324211806 0.00355689420442
hol 700 90 4.0 0.443185073732 0.00171545360877 0.00705732104644
hol 800 90 4.0 0.445284615448 0.00145560129283 0.0027814286111
hol 900 90 4.0 0.44622369365 0.00142686614624 0.00617451144355
hol 1000 90 4.0 0.44789426432 0.00108917097067 0.00351950425112
hol 400 90 5.0 0.425852211138 0.00338454042414 0.00414292482691
hol 500 90 5.0 0.432718314838 0.00232307150749 0.0052875413539
hol 550 90 5.0 0.435456000947 0.00203360925379 0.00715168629525
hol 600 90 5.0 0.437392447439 0.00212918051564 0.00788564309073
hol 700 90 5.0 0.438470500835 0.0017469049141 0.00407533223671
hol 800 90 5.0 0.440045992308 0.00147164252428 0.00275263472446
hol 900 90 5.0 0.442035177211 0.00143361363677 0.00781310482697
hol 1000 90 5.0 0.442730081116 0.00109728851554 0.00600529521682
ros 400 5 0.266 0.901927572732 7.04131348377e-05 0.0145400211707
ros 500 5 0.266 0.928813385648 5.20203388999e-05 0.0129520780779
ros 550 5 0.266 0.937713156795 4.57059877665e-05 0.00772845553443
ros 600 5 0.266 0.946483013811 4.84026355064e-05 0.0103777453001
ros 700 5 0.266 0.958777638621 3.78746771866e-05 0.0138369447823
ros 800 5 0.266 0.966777724527 3.01779928244e-05 0.0173688964629
ros 900 5 0.266 0.973182152551 2.81210477196e-05 0.00299440267634
ros 1000 5 0.266 0.977835684894 1.9624544242e-05 0.0123244659765
ros 400 5 0.375 0.839106983353 0.000109625945037 0.0151688231439
ros 500 5 0.375 0.878272596308 8.11168675537e-05 0.0150765248128
ros 550 5 0.375 0.89175795557 7.14594319566e-05 0.0101118639569
ros 600 5 0.375 0.905639310613 7.59126543614e-05 0.0118887646187
ros 700 5 0.375 0.925741452139 5.99910602278e-05 0.0150989982057
ros 800 5 0.375 0.939015535094 4.8325269765e-05 0.0198761841709
ros 900 5 0.375 0.950112176647 4.54024867777e-05 0.00490378631038
ros 1000 5 0.375 0.958340261742 3.23468009478e-05 0.0131510414607
ros 400 5 0.5 0.775385779744 0.000140924478887 0.0122736869914
ros 500 5 0.5 0.822199669118 0.000115340454422 0.0145321877658
ros 550 5 0.5 0.839096208479 0.000102693576885 0.0102681494794
ros 600 5 0.5 0.857241239136 0.00010914312231 0.0123056150303
ros 700 5 0.5 0.884659799522 8.66630411289e-05 0.0158441390832
ros 800 5 0.5 0.903308349926 7.00456297879e-05 0.0219026980473
ros 900 5 0.5 0.919508259624 6.62787966059e-05 0.00702539919659
ros 1000 5 0.5 0.932016910633 4.76621290983e-05 0.0142701882868
ros 400 5 0.75 0.683749729569 0.000185284692129 0.00547339698457
ros 500 5 0.75 0.731824021316 0.000153518637032 0.00851279736011
ros 550 5 0.75 0.750762898521 0.00014341270024 0.00581065851453
ros 600 5 0.75 0.772159733019 0.000159972085392 0.00947005035904
ros 700 5 0.75 0.807354226601 0.000138891701254 0.0152150772946
ros 800 5 0.75 0.831987597062 0.000115781490004 0.0221279628566
ros 900 5 0.75 0.85541313865 0.000110383329507 0.00847377319165
ros 1000 5 0.75 0.874849273927 8.00172107967e-05 0.0150591277599
ros 400 5 1.0 0.628119034624 0.000227556999002 0.00985711564453
ros 500 5 1.0 0.670516899952 0.000184207639631 0.00817085487014
ros 550 5 1.0 0.687981844605 0.000171864251361 0.0020216858171
ros 600 5 1.0 0.708976695344 0.00019070418429 0.00595768115896
ros 700 5 1.0 0.745486101212 0.000167807392137 0.012079244448
ros 800 5 1.0 0.771260841924 0.000147324551362 0.0191895711081
ros 900 5 1.0 0.797318358514 0.000149242909465 0.006561009914
ros 1000 5 1.0 0.820849736862 0.000113603382556 0.0147868552614
ros 400 5 1.5 0.57001825717 0.000304423133269 0.00953246387594
ros 500 5 1.5 0.600706575321 0.00024734321153 0.0105815932069
ros 550 5 1.5 0.613750040607 0.000228581243369 0.00498544259496
ros 600 5 1.5 0.63071003231 0.000250596194767 0.0108075964851
ros 700 5 1.5 0.662917317003 0.000215142267978 0.0133293571118
ros 800 5 1.5 0.685829350311 0.000188995854588 0.0152589760804
ros 900 5 1.5 0.710590380232 0.000191231363904 0.000865343631393
ros 1000 5 1.5 0.736162835599 0.00015000581376 0.0113462585234
ros 400 5 2.0 0.541331911779 0.000369969590204 0.00803132345169
ros 500 5 2.0 0.564729479637 0.000301780263719 0.009823011468
ros 550 5 2.0 0.574460010161 0.000281604591103 0.00593821234837
ros 600 5 2.0 0.588395195576 0.000310146333404 0.011758588619
ros 700 5 2.0 0.615283568002 0.000263906866148 0.0154163789198
ros 800 5 2.0 0.63342768366 0.00023025656813 0.0187487836618
ros 900 5 2.0 0.654194334346 0.000229346025788 0.00383433212973
ros 1000 5 2.0 0.678204353985 0.000177725845309 0.0110810021259
ros 400 5 2.5 0.524135645861 0.000412981337253 0.00732505377154
ros 500 5 2.5 0.543377258059 0.00035390545183 0.00885021302114
ros 550 5 2.5 0.550813453277 0.000326053754201 0.00555448643265
ros 600 5 2.5 0.562687727367 0.00035903272763 0.0104246633021
ros 700 5 2.5 0.585612794502 0.00030916424904 0.0151441763257
ros 800 5 2.5 0.600329191997 0.00027077256181 0.0176963312194
ros 900 5 2.5 0.617435637218 0.000269621777365 0.00559758147038
ros 1000 5 2.5 0.63853952535 0.000206563345734 0.0132813695891
ros 400 5 3.0 0.512836354152 0.000458213932639 0.00723525048635
ros 500 5 3.0 0.529052752613 0.000387673199999 0.00747384171252
ros 550 5 3.0 0.53521577407 0.000368156729574 0.00296793357905
ros 600 5 3.0 0.545437035754 0.000410992242446 0.00976869284817
ros 700 5 3.0 0.565212344544 0.000347238480484 0.0145457386316
ros 800 5 3.0 0.577510965577 0.000307263534063 0.0164455195548
ros 900 5 3.0 0.591757031235 0.000308270348917 0.00459648734467
ros 1000 5 3.0 0.610716967692 0.000235209193425 0.0137737094006
ros 400 5 4.0 0.497992366737 0.000524140591315 0.00507166203258
ros 500 5 4.0 0.510989386496 0.000458097370226 0.00537488044536
ros 550 5 4.0 0.515322629762 0.000428275126159 0.00221198954524
ros 600 5 4.0 0.523652369017 0.000475533875981 0.00690562195833
ros 700 5 4.0 0.540370435027 0.000417871791508 0.0111135763467
ros 800 5 4.0 0.548902763811 0.000374957575964 0.0155242694863
ros 900 5 4.0 0.559141855671 0.000372744551963 0.0033555724795
ros 1000 5 4.0 0.574664056074 0.000286720073001 0.0122445463383
ros 400 5 5.0 0.488254760582 0.000581926493772 0.00778512458075
ros 500 5 5.0 0.499191378669 0.000503634608787 0.00692121607955
ros 550 5 5.0 0.502965213663 0.000481512346133 0.00297999638343
ros 600 5 5.0 0.510293723478 0.000541760741877 0.0056712425831
ros 700 5 5.0 0.52426998717 0.000469850731558 0.0116044982424
ros 800 5 5.0 0.530957012026 0.000419444544111 0.0150656461695
ros 900 5 5.0 0.539228668645 0.000430483436061 0.000842766732153
ros 1000 5 5.0 0.552522986096 0.000335005074313 0.00992021972869
ros 400 10 0.266 0.778606122402 0.000137874708952 0.0174516316603
ros 500 10 0.266 0.817515620315 0.000103154123767 0.0144506654168
ros 550 10 0.266 0.833820215004 9.02246765443e-05 0.014475845358
ros 600 10 0.266 0.848082791181 9.53224573455e-05 0.0264888082758
ros 700 10 0.266 0.871942801828 7.52977884614e-05 0.026643066437
ros 800 10 0.266 0.891887682642 6.07835784218e-05 0.010740491417
ros 900 10 0.266 0.906122952168 5.69253369344e-05 0.0172819373764
ros 1000 10 0.266 0.919197183857 4.10902129046e-05 0.0115205770594
ros 400 10 0.375 0.68901136189 0.000192223934554 0.0108025963963
ros 500 10 0.375 0.732374490186 0.000146322985496 0.0102568346818
ros 550 10 0.375 0.75152747449 0.000131607759367 0.00993193040383
ros 600 10 0.375 0.768936084246 0.000142775380865 0.024122996054
ros 700 10 0.375 0.799359241166 0.000115792719266 0.0258015520416
ros 800 10 0.375 0.826096377312 9.34577371602e-05 0.0109172853802
ros 900 10 0.375 0.845810275872 8.7720241036e-05 0.0176417505161
ros 1000 10 0.375 0.86460731404 6.3604607347e-05 0.0122885308987
ros 400 10 0.5 0.624600179358 0.000228869362246 0.00876144999205
ros 500 10 0.5 0.664355302909 0.000184785177826 0.00474017096766
ros 550 10 0.5 0.682657975292 0.000167227467496 0.00322395263209
ros 600 10 0.5 0.700344718717 0.000182144803581 0.0203857424339
ros 700 10 0.5 0.73202240962 0.000151872478018 0.0225298691769
ros 800 10 0.5 0.761300695729 0.000128236904552 0.00756700072195
ros 900 10 0.5 0.783897754759 0.000123899147792 0.0162980928148
ros 1000 10 0.5 0.80625090344 9.0197589859e-05 0.0117579255552
ros 400 10 0.75 0.559220226028 0.000269814213325 0.0132765409601
ros 500 10 0.75 0.588242370417 0.000221358649753 0.0101329483958
ros 550 10 0.75 0.601934377272 0.000207101213521 0.00570220441377
ros 600 10 0.75 0.616581184697 0.000232583623941 0.0221083204668
ros 700 10 0.75 0.643818411073 0.000205376320528 0.0212633846886
ros 800 10 0.75 0.670259339153 0.000177135822918 0.00145236963141
ros 900 10 0.75 0.692454444722 0.000175172066078 0.0102001506412
ros 1000 10 0.75 0.715454936884 0.000132622775282 0.00655307832473
ros 400 10 1.0 0.528522734149 0.000304533179427 0.01255971002
ros 500 10 1.0 0.549928289386 0.000246648364209 0.0111083722345
ros 550 10 1.0 0.560195335165 0.000230762405559 0.00614636872853
ros 600 10 1.0 0.57186695602 0.000258310424243 0.0239681957806
ros 700 10 1.0 0.59386953984 0.000231040703122 0.0245160264625
ros 800 10 1.0 0.614997106911 0.000206540844633 0.00505162534371
ros 900 10 1.0 0.634210220899 0.00021253244158 0.0144284855418
ros 1000 10 1.0 0.655016536945 0.000165715407265 0.0080473511057
ros 400 10 1.5 0.499997152788 0.000373030570499 0.010523796525
ros 500 10 1.5 0.513941222892 0.00030031819617 0.00892963706955
ros 550 10 1.5 0.520603420483 0.000277858887198 0.00427233296324
ros 600 10 1.5 0.528083810584 0.000307552458901 0.022977825035
ros 700 10 1.5 0.54325807815 0.000269518601015 0.0246728356218
ros 800 10 1.5 0.557535547115 0.000240595783076 0.00624750387591
ros 900 10 1.5 0.570981558453 0.000247342153604 0.016820998119
ros 1000 10 1.5 0.587243609569 0.000197242488821 0.0116669034059
ros 400 10 2.0 0.486197832372 0.00043844829119 0.0095175028172
ros 500 10 2.0 0.496635821347 0.000351966706252 0.00698484264158
ros 550 10 2.0 0.501487198335 0.000326897066347 0.00240519362655
ros 600 10 2.0 0.507217905348 0.000361739440744 0.0211572183811
ros 700 10 2.0 0.518945735256 0.000311821429549 0.0231609927606
ros 800 10 2.0 0.529195330455 0.000275274579337 0.00462784109784
ros 900 10 2.0 0.538784050186 0.000278727835075 0.0159913927242
ros 1000 10 2.0 0.552318368687 0.000219301225654 0.0113475583675
ros 400 10 2.5 0.478222489138 0.000485742310083 0.0073210364761
ros 500 10 2.5 0.486609532206 0.00040476019859 0.00595954690578
ros 550 10 2.5 0.490038542107 0.000371508415321 0.00194834814101
ros 600 10 2.5 0.494890024789 0.000409964864617 0.0195398802957
ros 700 10 2.5 0.504628013396 0.000354689611218 0.0215677555454
ros 800 10 2.5 0.512690831075 0.000312141643416 0.00310201796471
ros 900 10 2.5 0.520146273449 0.000314010984561 0.0143593840306
ros 1000 10 2.5 0.531698148853 0.000243660561534 0.00958477177727
ros 400 10 3.0 0.472555407731 0.00053732565773 0.00616484640863
ros 500 10 3.0 0.479434715742 0.000442348943269 0.0053348121717
ros 550 10 3.0 0.482742107542 0.000415561452923 0.00210190290705
ros 600 10 3.0 0.486893153745 0.000462999254977 0.0183098433794
ros 700 10 3.0 0.495002200126 0.000393156284692 0.0200126705192
ros 800 10 3.0 0.501705928291 0.000347591927064 0.00141487535928
ros 900 10 3.0 0.507734212266 0.000350463041736 0.013036396794
ros 1000 10 3.0 0.518216575867 0.000269666287949 0.00791858057692
ros 400 10 4.0 0.464740743788 0.000616144611485 0.00518605121281
ros 500 10 4.0 0.470409036266 0.000522500716428 0.00623256507618
ros 550 10 4.0 0.472575356268 0.000484452373873 0.00167702167712
ros 600 10 4.0 0.475893115318 0.000536315319987 0.018561467073
ros 700 10 4.0 0.483303627574 0.000468551406995 0.0176910461445
ros 800 10 4.0 0.487701581466 0.00041785325677 0.000960833194288
ros 900 10 4.0 0.491832752279 0.000416141249927 0.0102263954909
ros 1000 10 4.0 0.500532768218 0.000320722159697 0.00667828345393
ros 400 10 5.0 0.459271188524 0.000685312958086 0.00321954294854
ros 500 10 5.0 0.464355014977 0.000577268582145 0.00499310885551
ros 550 10 5.0 0.466569539545 0.000545936363969 0.00456281667437
ros 600 10 5.0 0.469397093828 0.000611702873908 0.0200194316757
ros 700 10 5.0 0.474940871244 0.000528704275005 0.0198392310316
ros 800 10 5.0 0.478692602962 0.000467934512684 0.00308299247599
ros 900 10 5.0 0.482404582729 0.000477338058229 0.012052929871
ros 1000 10 5.0 0.490076543015 0.000370875038223 0.00587977224201
ros 400 15 0.266 0.697167096263 0.000216280962381 0.0180315991959
ros 500 15 0.266 0.736019933075 0.000160686076703 0.014088765815
ros 550 15 0.266 0.753527766199 0.000141986739403 0.0159801732455
ros 600 15 0.266 0.768393801353 0.00015149714015 0.0227611078846
ros 700 15 0.266 0.795970468021 0.000121167936993 0.0222120434067
ros 800 15 0.266 0.820069173136 9.7506236103e-05 0.0136641513858
ros 900 15 0.266 0.839141168716 9.12284861919e-05 0.0124101695105
ros 1000 15 0.266 0.857066433315 6.62743032792e-05 0.0110366573856
ros 400 15 0.375 0.607279894333 0.000286043974857 0.00662974047306
ros 500 15 0.375 0.644446760691 0.000215380628913 0.00448960737899
ros 550 15 0.375 0.661925987588 0.000193743949586 0.00513807375467
ros 600 15 0.375 0.67743107124 0.000210620161751 0.0156023445443
ros 700 15 0.375 0.707349027349 0.000173135499936 0.0169821316827
ros 800 15 0.375 0.734896815015 0.00014319069811 0.00795059871372
ros 900 15 0.375 0.757635946784 0.000136642472717 0.00964870636625
ros 1000 15 0.375 0.779994048826 0.000100291524543 0.00940761449943
ros 400 15 0.5 0.555989556036 0.000334996673627 0.0116861372142
ros 500 15 0.5 0.585292380449 0.000255217817844 0.00661539921154
ros 550 15 0.5 0.600045340581 0.000230322671624 0.00379397620767
ros 600 15 0.5 0.613185760576 0.000251932205799 0.0138153644408
ros 700 15 0.5 0.639951945408 0.000211989163023 0.01206082022
ros 800 15 0.5 0.666081639647 0.00018119901519 0.00138397865953
ros 900 15 0.5 0.688131267958 0.000177426651299 0.00491942052114
ros 1000 15 0.5 0.711211901932 0.000132366626586 0.00513297059018
ros 400 15 0.75 0.511669646119 0.000404419653802 0.0117101715146
ros 500 15 0.75 0.530519012343 0.000315004570961 0.00867409021645
ros 550 15 0.75 0.540137308867 0.000285792813593 0.00533467867537
ros 600 15 0.75 0.549346871142 0.000312826004116 0.0178592753387
ros 700 15 0.75 0.56818069563 0.000264960542088 0.0178580351204
ros 800 15 0.75 0.587649162769 0.000227659695746 0.00637291140216
ros 900 15 0.75 0.604872466994 0.000227626300711 0.00744626860357
ros 1000 15 0.75 0.623974473915 0.000174826085847 0.00580310289006
ros 400 15 1.0 0.492227167374 0.000462029311061 0.010351729073
ros 500 15 1.0 0.505997546724 0.000364300363699 0.00700316089282
ros 550 15 1.0 0.512650186002 0.000334831395751 0.0048156202954
ros 600 15 1.0 0.519549991935 0.000367252006987 0.0171322373407
ros 700 15 1.0 0.533351647004 0.000312011249844 0.0182311600045
ros 800 15 1.0 0.547933518655 0.000267253256142 0.00716632542217
ros 900 15 1.0 0.560937821574 0.000267047114789 0.00927544571185
ros 1000 15 1.0 0.576056710999 0.000205381825221 0.00867264225081
ros 400 15 1.5 0.474232573803 0.000557893760198 0.0082786660484
ros 500 15 1.5 0.483001054161 0.000453903853922 0.00510096814895
ros 550 15 1.5 0.4873924595 0.0004201817042 0.00231753471644
ros 600 15 1.5 0.491666831949 0.000462599620697 0.0150467005235
ros 700 15 1.5 0.500862147825 0.000393593581455 0.0156639208896
ros 800 15 1.5 0.509982848831 0.000342709385607 0.0058453095195
ros 900 15 1.5 0.518412580561 0.00034269585789 0.00811093031392
ros 1000 15 1.5 0.528827561667 0.000263943418578 0.00806865970708
ros 400 15 2.0 0.465393228394 0.000646977492449 0.00784638370504
ros 500 15 2.0 0.47198256858 0.000520793791176 0.00367635886499
ros 550 15 2.0 0.475261813771 0.000487432858147 0.00151170430246
ros 600 15 2.0 0.478503810487 0.000542776433728 0.0136647704087
ros 700 15 2.0 0.485533804089 0.000470357237387 0.0139977984317
ros 800 15 2.0 0.491866688088 0.000410982000326 0.0040395160895
ros 900 15 2.0 0.497991672565 0.00040546812943 0.00622234429301
ros 1000 15 2.0 0.506103240614 0.000316119671805 0.00601828903438
ros 400 15 2.5 0.459751046289 0.000701560147731 0.00681564292835
ros 500 15 2.5 0.465245828784 0.000596113717982 0.00347426233055
ros 550 15 2.5 0.467855589295 0.000542416540726 0.000814520795996
ros 600 15 2.5 0.470683784706 0.000600968125728 0.0123362869956
ros 700 15 2.5 0.476270787054 0.000530350302793 0.0124565210628
ros 800 15 2.5 0.481431839719 0.000467277525984 0.00199120991721
ros 900 15 2.5 0.486311562646 0.000470333010389 0.0042192751507
ros 1000 15 2.5 0.492878131602 0.000365534793615 0.00453130545154
ros 400 15 3.0 0.456028188343 0.000758602839397 0.00611360108597
ros 500 15 3.0 0.460702761475 0.000633321341815 0.00220305309059
ros 550 15 3.0 0.463108174489 0.00060162044433 0.00227454710974
ros 600 15 3.0 0.465492789612 0.000679120301272 0.0110915703086
ros 700 15 3.0 0.469959965118 0.000575367018099 0.0128237613255
ros 800 15 3.0 0.474316245631 0.00051370287295 0.000716042029842
ros 900 15 3.0 0.478240280725 0.000522824481202 0.00330021699944
ros 1000 15 3.0 0.484157228604 0.000405948844379 0.00271568931875
ros 400 15 4.0 0.450712792287 0.000856443832724 0.00488506253645
ros 500 15 4.0 0.454269235217 0.000728945003711 0.00467037399574
ros 550 15 4.0 0.456005515239 0.000679791584128 0.002320779772
ros 600 15 4.0 0.458265939055 0.000764442531987 0.0132518927783
ros 700 15 4.0 0.461805908254 0.000673283157113 0.0118649375852
ros 800 15 4.0 0.464967543441 0.000610392600523 0.000925282345965
ros 900 15 4.0 0.467795625256 0.000601239983442 0.00350402875745
ros 1000 15 4.0 0.472748696163 0.000471213495669 0.00210211805288
ros 400 15 5.0 0.446132657782 0.000941376846895 0.00580318438815
ros 500 15 5.0 0.450307993273 0.000793793254244 0.00247566048012
ros 550 15 5.0 0.45140036835 0.00075500852184 0.00413356756444
ros 600 15 5.0 0.453045290737 0.000849712742931 0.0124084810295
ros 700 15 5.0 0.456479500074 0.000744185470254 0.0130005781501
ros 800 15 5.0 0.458601057212 0.000664604516204 0.00216573895534
ros 900 15 5.0 0.461193176654 0.000684429425967 0.0045580600403
ros 1000 15 5.0 0.465525299751 0.000543527355472 0.00541172982064
ros 400 20 0.266 0.643003512043 0.000315138764037 0.0151898051779
ros 500 20 0.266 0.679395759722 0.000224679634793 0.0141443585768
ros 550 20 0.266 0.695828504374 0.000198656737712 0.0160611694424
ros 600 20 0.266 0.710372103384 0.0002120292147 0.0187550517348
ros 700 20 0.266 0.737817378075 0.000170795740397 0.0176094792207
ros 800 20 0.266 0.76239368569 0.00013920637459 0.0165300914759
ros 900 20 0.266 0.783559353647 0.000131056130788 0.016265912961
ros 1000 20 0.266 0.802875000452 9.52564329152e-05 0.0134375382262
ros 400 20 0.375 0.558715444194 0.000420853940941 0.00707076203502
ros 500 20 0.375 0.589804615703 0.000302782436131 0.0011346666798
ros 550 20 0.375 0.60458529669 0.000267649174337 0.00139863868581
ros 600 20 0.375 0.618238875693 0.000286018666612 0.00823262281436
ros 700 20 0.375 0.644716432648 0.000232496817817 0.0084702919225
ros 800 20 0.375 0.67024432857 0.000193603549636 0.0062022002181
ros 900 20 0.375 0.692824616164 0.000185994597713 0.00765832560958
ros 1000 20 0.375 0.71458045102 0.000138260472015 0.00778997484254
ros 400 20 0.5 0.518654771937 0.000481731434174 0.00915025417871
ros 500 20 0.5 0.541155125836 0.000357485482547 0.00588870639055
ros 550 20 0.5 0.552613780648 0.000318872906154 0.0053723472936
ros 600 20 0.5 0.562897640268 0.000343874899475 0.0118074181699
ros 700 20 0.5 0.584462699773 0.000281922314073 0.010333560467
ros 800 20 0.5 0.605997550409 0.000236177390627 0.00314856163837
ros 900 20 0.5 0.62586834394 0.000228840249007 0.00187023674573
ros 1000 20 0.5 0.645964309887 0.000172265016572 0.00197343006571
ros 400 20 0.75 0.486388980991 0.000560638006254 0.00806251415008
ros 500 20 0.75 0.500598093699 0.000431967307765 0.00544594903703
ros 550 20 0.75 0.507499680357 0.000391135519371 0.00465908849828
ros 600 20 0.75 0.514216359543 0.00042667263262 0.012492875028
ros 700 20 0.75 0.527985495492 0.000357027777132 0.0124227618157
ros 800 20 0.75 0.542374554668 0.000302751357139 0.00651998477206
ros 900 20 0.75 0.555875626865 0.00029662485668 0.00609733293665
ros 1000 20 0.75 0.570610315229 0.000223999582982 0.0082452547239
ros 400 20 1.0 0.472223170843 0.000626500293116 0.00751765154719
ros 500 20 1.0 0.482804757662 0.000490783986413 0.00400139942026
ros 550 20 1.0 0.48806772014 0.00044995052436 0.00333290025642
ros 600 20 1.0 0.49285782471 0.000494322766419 0.0112204542191
ros 700 20 1.0 0.502702427113 0.000418963815567 0.0111103930304
ros 800 20 1.0 0.513069978616 0.000358118873514 0.00493537279178
ros 900 20 1.0 0.522987367374 0.00035443680332 0.00553309847617
ros 1000 20 1.0 0.533895174554 0.000269283501376 0.00838998741164
ros 400 20 1.5 0.459275985918 0.000735686364881 0.00544052336032
ros 500 20 1.5 0.466515308564 0.000591839689016 0.0028737756154
ros 550 20 1.5 0.469521059604 0.000548087707653 0.00157337806927
ros 600 20 1.5 0.472838447366 0.000605919680035 0.00906849620114
ros 700 20 1.5 0.479314320641 0.000516831750063 0.00913207764815
ros 800 20 1.5 0.485982230347 0.000452099538624 0.0023445401292
ros 900 20 1.5 0.491972487531 0.000453218552234 0.00362634916912
ros 1000 20 1.5 0.499363763558 0.000348166212419 0.00600564871242
ros 400 20 2.0 0.452913899113 0.000834653653174 0.00503916166171
ros 500 20 2.0 0.458420638707 0.000668628547195 0.00112682227365
ros 550 20 2.0 0.460875568345 0.00062306311648 0.000787284983163
ros 600 20 2.0 0.463174226124 0.000694850458997 0.00820177027713
ros 700 20 2.0 0.467846652949 0.000604284149581 0.0083022228958
ros 800 20 2.0 0.472691253467 0.000530701381094 0.00139550543503
ros 900 20 2.0 0.47724972367 0.000526431681608 0.00145481230253
ros 1000 20 2.0 0.482784308656 0.000411991186734 0.00453250541728
ros 400 20 2.5 0.448487598932 0.000902226290145 0.00418518800604
ros 500 20 2.5 0.45337688343 0.000750092541949 0.00104367709308
ros 550 20 2.5 0.455345106915 0.000684683722013 0.000728624364492
ros 600 20 2.5 0.456966942744 0.000762844218097 0.0106428822296
ros 700 20 2.5 0.461421588024 0.000672096569059 0.00842151120931
ros 800 20 2.5 0.464989964845 0.000593146370757 0.00198850973347
ros 900 20 2.5 0.468651579421 0.000599879330449 0.00271869593193
ros 1000 20 2.5 0.473017563125 0.00046875014461 0.00325043281755
ros 400 20 3.0 0.445492012929 0.000973033439309 0.00413701825289
ros 500 20 3.0 0.449576899006 0.000796921852638 0.000413001178331
ros 550 20 3.0 0.451635909241 0.000751443879366 0.00197141165276
ros 600 20 3.0 0.453044921878 0.000846269025105 0.00669676250573
ros 700 20 3.0 0.456327273754 0.000724347965423 0.00620496907892
ros 800 20 3.0 0.459869151706 0.0006449784997 0.00183497195854
ros 900 20 3.0 0.462746001517 0.000658738209203 0.000889123196205
ros 1000 20 3.0 0.466584333366 0.000513736500769 0.00195617049476
ros 400 20 4.0 0.441500064277 0.0010856160664 0.00286806453833
ros 500 20 4.0 0.444681644225 0.000904118029457 0.000773380249015
ros 550 20 4.0 0.446425782243 0.000842243878431 0.00336717827972
ros 600 20 4.0 0.447637758406 0.000950177355488 0.00569709969182
ros 700 20 4.0 0.450428109022 0.000831413083315 0.00710490442539
ros 800 20 4.0 0.452648834806 0.000750254087158 0.00237494667569
ros 900 20 4.0 0.454991100123 0.000747019467524 0.00295093274963
ros 1000 20 4.0 0.458109407109 0.000587420475874 0.00226095797296
ros 400 20 5.0 0.437794307279 0.00118258939884 0.00287305380765
ros 500 20 5.0 0.441959347961 0.000981186048192 0.00431478571522
ros 550 20 5.0 0.442811617375 0.000925751865623 0.00514689076401
ros 600 20 5.0 0.443931448712 0.00103752988971 0.00834699963318
ros 700 20 5.0 0.446109937246 0.000913613182796 0.00930832076961
ros 800 20 5.0 0.447846195672 0.000814423960703 0.00428494043553
ros 900 20 5.0 0.450119160154 0.000837281549517 0.00495091891256
ros 1000 20 5.0 0.452307878343 0.000664843708101 0.00225717256772
ros 400 25 0.266 0.604978679743 0.000453027915704 0.0130778112402
ros 500 25 0.266 0.638180534472 0.000308682746669 0.0136431581675
ros 550 25 0.266 0.653491587637 0.000268174462201 0.0153693379987
ros 600 25 0.266 0.667299363124 0.000281920711315 0.0165088640512
ros 700 25 0.266 0.69347471076 0.00022406114969 0.0157095302429
ros 800 25 0.266 0.717234973167 0.000183350904414 0.0169115087258
ros 900 25 0.266 0.738553560303 0.000173630850707 0.0173758631627
ros 1000 25 0.266 0.757795480311 0.000127280839824 0.0140892771076
ros 400 25 0.375 0.52772422263 0.000591186383137 0.00536298312152
ros 500 25 0.375 0.553710018138 0.000414849009774 0.00218862405878
ros 550 25 0.375 0.566229963774 0.000363146681137 0.00198322591937
ros 600 25 0.375 0.577976321597 0.000383772307937 0.00565991926981
ros 700 25 0.375 0.601254418751 0.000305972194673 0.00435799214452
ros 800 25 0.375 0.623986918346 0.000250538112189 0.00343711655117
ros 900 25 0.375 0.644907630674 0.000238391062564 0.00504246204798
ros 1000 25 0.375 0.664746264402 0.000177018254094 0.00590462564538
ros 400 25 0.5 0.495158020883 0.000655824094922 0.00658061695608
ros 500 25 0.5 0.513423509315 0.000477675720653 0.00529892153882
ros 550 25 0.5 0.522599016391 0.000423752750187 0.00462355082673
ros 600 25 0.5 0.531147193265 0.000454142562793 0.0101580249458
ros 700 25 0.5 0.54866917327 0.000368558676599 0.00869050621016
ros 800 25 0.5 0.566427219131 0.000305366215568 0.00491019936714
ros 900 25 0.5 0.583460486232 0.000292417822479 0.00400399270201
ros 1000 25 0.5 0.600502568375 0.000218067111674 0.00486350789415
ros 400 25 0.75 0.470231130149 0.000735494517258 0.00495133564955
ros 500 25 0.75 0.482115278979 0.000555243962908 0.00382116850908
ros 550 25 0.75 0.487494878613 0.000501614209605 0.00336105552891
ros 600 25 0.75 0.492894448042 0.000545409779957 0.00890417119105
ros 700 25 0.75 0.503737342375 0.000455741764217 0.00842681968971
ros 800 25 0.75 0.514696471286 0.000386733771291 0.00522612775354
ros 900 25 0.75 0.525845026959 0.000377076499385 0.00659362672259
ros 1000 25 0.75 0.537222018069 0.000283911316874 0.00857184649413
ros 400 25 1.0 0.459664594915 0.000804001797152 0.00356805195709
ros 500 25 1.0 0.467999578987 0.000618859646348 0.00275105321953
ros 550 25 1.0 0.472516749018 0.0005641755121 0.00311378803858
ros 600 25 1.0 0.476250247971 0.000618769678201 0.00780616663233
ros 700 25 1.0 0.483993762473 0.000524499647103 0.00762983698651
ros 800 25 1.0 0.492083014923 0.00044951729131 0.00374021826598
ros 900 25 1.0 0.499941938925 0.000445074321233 0.00415360890089
ros 1000 25 1.0 0.508270712286 0.00033876559657 0.00750653544789
ros 400 25 1.5 0.449037422438 0.000928197185641 0.00324031768498
ros 500 25 1.5 0.455102477608 0.000730207034232 0.00151507283638
ros 550 25 1.5 0.458000943728 0.000670708761056 0.00098410141078
ros 600 25 1.5 0.46051235981 0.000740659248789 0.00627465875364
ros 700 25 1.5 0.465883314571 0.000631247835004 0.00509780142116
ros 800 25 1.5 0.470844141712 0.00055253120745 0.00384220454999
ros 900 25 1.5 0.47624309779 0.000553767572036 0.00347388974854
ros 1000 25 1.5 0.481398510899 0.000426807627006 0.0053164136615
ros 400 25 2.0 0.444272423665 0.00104137096845 0.00155584381355
ros 500 25 2.0 0.448998206795 0.000818221489531 0.000100153690571
ros 550 25 2.0 0.450907180938 0.000756061734035 0.000639615638518
ros 600 25 2.0 0.452889576899 0.000837988707033 0.00571188525145
ros 700 25 2.0 0.456972092956 0.000724715947889 0.00423920083878
ros 800 25 2.0 0.460495702692 0.000637150966964 0.00121894278575
ros 900 25 2.0 0.464787428912 0.000633292115086 0.00236570660434
ros 1000 25 2.0 0.468469201928 0.000496521309292 0.00420769479205
ros 400 25 2.5 0.440586792533 0.00112233901638 0.00205257137082
ros 500 25 2.5 0.444929141403 0.000904197480635 0.00131876374179
ros 550 25 2.5 0.446719688353 0.000826612325373 0.00199425044586
ros 600 25 2.5 0.448032768549 0.000918247331671 0.00514134402035
ros 700 25 2.5 0.451470562619 0.000801590467816 0.00405883206189
ros 800 25 2.5 0.454564065573 0.000705397205338 0.000609823713916
ros 900 25 2.5 0.457422213363 0.000712748633731 0.00148745272043
ros 1000 25 2.5 0.460995506012 0.00055654086428 0.00244634829664
ros 400 25 3.0 0.438264937629 0.00120810263239 0.0016646534087
ros 500 25 3.0 0.441958322653 0.000964425710825 0.00385143261929
ros 550 25 3.0 0.44375246792 0.000898907244864 0.00231497478692
ros 600 25 3.0 0.445623374532 0.00100075749553 0.003297519055
ros 700 25 3.0 0.44794442734 0.000861064601759 0.00247749259157
ros 800 25 3.0 0.450367976508 0.000764857856035 0.00195961709198
ros 900 25 3.0 0.452621234152 0.000777316723175 0.000923690829099
ros 1000 25 3.0 0.455276927315 0.000606789757061 0.00515466490877
ros 400 25 4.0 0.434646036708 0.00133946562817 0.00458983734733
ros 500 25 4.0 0.437992401053 0.00108403671508 0.00233294749156
ros 550 25 4.0 0.439397026324 0.00100186215152 0.0030082521148
ros 600 25 4.0 0.440884899275 0.00112303243244 0.0101271405432
ros 700 25 4.0 0.442745885755 0.000978826570888 0.00424191796406
ros 800 25 4.0 0.444798174955 0.000873540064274 0.00351835941569
ros 900 25 4.0 0.446600982607 0.000875814874187 0.00404381158797
ros 1000 25 4.0 0.448649002926 0.0006890917279 0.00393403192624
ros 400 25 5.0 0.431054082052 0.0014465846336 0.00477491719291
ros 500 25 5.0 0.435114100392 0.00116991101104 0.00452712822708
ros 550 25 5.0 0.436162669213 0.00109041246921 0.00473717570696
ros 600 25 5.0 0.437188099795 0.00122051139687 0.00794668477952
ros 700 25 5.0 0.438710362383 0.00106904442866 0.0067677586419
ros 800 25 5.0 0.440707352126 0.000949205630499 0.0051763529536
ros 900 25 5.0 0.442377570457 0.000971855342323 0.00547839852709
ros 1000 25 5.0 0.444190005075 0.000767204239795 0.00321821054675
ros 400 30 0.266 0.576333617673 0.000631392523876 0.0109530522904
ros 500 30 0.266 0.607378113382 0.000416756561191 0.0134325054696
ros 550 30 0.266 0.621327135645 0.000357112225 0.0146519116592
ros 600 30 0.266 0.634446137863 0.000370515760016 0.0153860130412
ros 700 30 0.266 0.658615441566 0.000288673175268 0.0146365782795
ros 800 30 0.266 0.681528369267 0.000232489003886 0.0163346677919
ros 900 30 0.266 0.702073696945 0.000218719824813 0.0172068402881
ros 1000 30 0.266 0.720656475723 0.000160892317573 0.0145096313946
ros 400 30 0.375 0.505410732851 0.00079509204244 0.00483727165942
ros 500 30 0.375 0.528264836755 0.000547617790596 0.00221852854082
ros 550 30 0.375 0.539115784289 0.000476307837322 0.0036696229023
ros 600 30 0.375 0.549207563222 0.00050050951559 0.0060299852548
ros 700 30 0.375 0.569441088693 0.000394706898434 0.00346907971294
ros 800 30 0.375 0.589930064383 0.000319134075716 0.000799289968867
ros 900 30 0.375 0.608675807589 0.000300841125917 0.00253440869939
ros 1000 30 0.375 0.626555203453 0.000221609096205 0.00364302049667
ros 400 30 0.5 0.478842159659 0.000857798146427 0.00416814618401
ros 500 30 0.5 0.494684056163 0.000611974300516 0.00501183164429
ros 550 30 0.5 0.502099880206 0.000540463367747 0.0041790118281
ros 600 30 0.5 0.509293168997 0.000576135431223 0.00891058266128
ros 700 30 0.5 0.523924030588 0.000465443980739 0.00754290767799
ros 800 30 0.5 0.539035911904 0.000383539855823 0.00485071232148
ros 900 30 0.5 0.553525163139 0.000365888009092 0.00488656212475
ros 1000 30 0.5 0.567818482037 0.000271769942584 0.00654937894782
ros 400 30 0.75 0.458559065727 0.000939234175442 0.00316987351677
ros 500 30 0.75 0.468622731039 0.000690693629996 0.00259200383504
ros 550 30 0.75 0.473426487868 0.000619237274141 0.00433234916153
ros 600 30 0.75 0.477788089977 0.000669977023624 0.00771096043329
ros 700 30 0.75 0.486746353957 0.000557099383232 0.0069674056678
ros 800 30 0.75 0.496230626108 0.000471889430148 0.00490717211046
ros 900 30 0.75 0.505264769673 0.000460500423511 0.00486157591541
ros 1000 30 0.75 0.514555321323 0.000347054785248 0.00774390498351
ros 400 30 1.0 0.449651411988 0.00101097395787 0.00208574866579
ros 500 30 1.0 0.45784254813 0.000756135323587 0.00116869831143
ros 550 30 1.0 0.46106644636 0.0006847809705 0.00254536809258
ros 600 30 1.0 0.464462453685 0.000745797406751 0.00613721792009
ros 700 30 1.0 0.47120692766 0.000628094962852 0.00500759130904
ros 800 30 1.0 0.477866261428 0.000537930156382 0.00311512331901
ros 900 30 1.0 0.484204184867 0.000532880435054 0.00360797212458
ros 1000 30 1.0 0.491128297079 0.000406766189349 0.00576875297264
ros 400 30 1.5 0.441183475702 0.00115072818564 0.00173082863614
ros 500 30 1.5 0.446836020673 0.000880266591499 0.00124826254717
ros 550 30 1.5 0.449377096467 0.000800902510822 0.00306008471669
ros 600 30 1.5 0.45173827525 0.00087859501143 0.00534454035125
ros 700 30 1.5 0.456423878762 0.000743546192734 0.0026855203294
ros 800 30 1.5 0.460878410322 0.000647592681651 0.00244652637696
ros 900 30 1.5 0.464784578275 0.000648111876486 0.00162085998246
ros 1000 30 1.5 0.469171516153 0.00050008342778 0.0042703026005
ros 400 30 2.0 0.436881204286 0.00127981451388 0.00365037916186
ros 500 30 2.0 0.441179812406 0.000983308445074 0.00203003219186
ros 550 30 2.0 0.444078760702 0.000896328795142 0.00161165959068
ros 600 30 2.0 0.445575346864 0.000986693160593 0.00385190996561
ros 700 30 2.0 0.448958050709 0.000844130114142 0.0041438329738
ros 800 30 2.0 0.452036485807 0.000738148984116 0.00065919139485
ros 900 30 2.0 0.455223980934 0.000735195283549 0.00329876944485
ros 1000 30 2.0 0.458527712873 0.000574217263452 0.00339974977128
ros 400 30 2.5 0.433591099803 0.00138451779859 0.00107205666567
ros 500 30 2.5 0.438470467328 0.00107612406656 0.00222727713999
ros 550 30 2.5 0.440088911026 0.000977149676011 0.001849655291
ros 600 30 2.5 0.441647433954 0.00107535109573 0.00324486860171
ros 700 30 2.5 0.444578395225 0.000929073736061 0.00147582467869
ros 800 30 2.5 0.446997264363 0.00081345381931 0.000247393716903
ros 900 30 2.5 0.449915809052 0.00081788859751 0.00210464275968
ros 1000 30 2.5 0.452072617333 0.000638787806328 0.00424789351049
ros 400 30 3.0 0.432176075136 0.00147378151133 0.00299438212835
ros 500 30 3.0 0.436097835678 0.0011419513264 0.00197060624704
ros 550 30 3.0 0.437136008975 0.00105584677679 0.000934229819252
ros 600 30 3.0 0.438918402612 0.00116624218339 0.00564003367268
ros 700 30 3.0 0.441240404304 0.000998752783218 0.00128619617921
ros 800 30 3.0 0.443859992357 0.000877081091411 0.00202761988031
ros 900 30 3.0 0.445801914998 0.00088897672649 0.00410676904685
ros 1000 30 3.0 0.447799454109 0.000692309425987 0.00282644892958
ros 400 30 4.0 0.428308651533 0.00163215841851 0.00182588193716
ros 500 30 4.0 0.432380201804 0.00127495795577 0.00210366062492
ros 550 30 4.0 0.433991337061 0.00116924841997 0.00341362573194
ros 600 30 4.0 0.43507209625 0.00130015605786 0.00740008407311
ros 700 30 4.0 0.437015597343 0.00112255047807 0.00251495006466
ros 800 30 4.0 0.438793012335 0.000993917717203 0.00266445762898
ros 900 30 4.0 0.439977316374 0.000999303795369 0.00274863417983
ros 1000 30 4.0 0.44222905746 0.000782986438904 0.00287742135625
ros 400 30 5.0 0.425447519229 0.0017446779738 0.0028422071296
ros 500 30 5.0 0.430286638009 0.00136851682861 0.00537134237443
ros 550 30 5.0 0.431530645661 0.00126528931616 0.0063996775106
ros 600 30 5.0 0.432287000764 0.00140132579251 0.000901642101003
ros 700 30 5.0 0.433729025051 0.00122239849194 0.0115146816998
ros 800 30 5.0 0.435405834632 0.00107711933314 0.00473130115214
ros 900 30 5.0 0.436804069857 0.00109915955812 0.00519705944356
ros 1000 30 5.0 0.43831367271 0.000863154667718 0.00509596191842
ros 400 40 0.266 0.535025054526 0.00110193788441 0.0107955898857
ros 500 40 0.266 0.562864854068 0.000705482902028 0.0122923431197
ros 550 40 0.266 0.575469201958 0.000594422730104 0.013590589086
ros 600 40 0.266 0.586567075166 0.000608670141718 0.0145488557035
ros 700 40 0.266 0.608532325375 0.000459139556612 0.0141389454306
ros 800 40 0.266 0.628790643364 0.000360826763416 0.0145074297209
ros 900 40 0.266 0.64737568366 0.00033180479867 0.01596944529
ros 1000 40 0.266 0.664384401098 0.000239665716421 0.0149803522235
ros 400 40 0.375 0.475604905509 0.00129883087968 0.000868826680794
ros 500 40 0.375 0.493423702994 0.000876555201056 0.00390121104996
ros 550 40 0.375 0.502896593152 0.000751505746937 0.00372076142903
ros 600 40 0.375 0.51080028197 0.000781917427537 0.00546116788641
ros 700 40 0.375 0.527359598682 0.000607789877172 0.00334820072172
ros 800 40 0.375 0.543098563712 0.000487218190073 0.00275215876728
ros 900 40 0.375 0.558381768146 0.000454033458021 0.00135700718774
ros 1000 40 0.375 0.573210134546 0.000330474999859 0.0015071296106
ros 400 40 0.5 0.455408343074 0.00137148069172 0.00282705581342
ros 500 40 0.5 0.468766213095 0.000936912148211 0.00357547656466
ros 550 40 0.5 0.475545336184 0.000815018887076 0.00480725102845
ros 600 40 0.5 0.480711130666 0.000859410970547 0.00640291978842
ros 700 40 0.5 0.492096629365 0.000683071416263 0.00588929938431
ros 800 40 0.5 0.503406648612 0.000559315237112 0.00561645822193
ros 900 40 0.5 0.514285225669 0.000532009266496 0.00508389664951
ros 1000 40 0.5 0.525238914049 0.000393412720813 0.00615825955065
ros 400 40 0.75 0.441139763676 0.00145217562516 0.00449094528167
ros 500 40 0.75 0.45057256997 0.00101359479309 0.00228501904379
ros 550 40 0.75 0.454798322182 0.000892078868391 0.00304442375994
ros 600 40 0.75 0.45840107678 0.000949599267539 0.00427287391357
ros 700 40 0.75 0.465078755423 0.000774550798398 0.00412088827264
ros 800 40 0.75 0.472445462837 0.000648905252629 0.00419997414497
ros 900 40 0.75 0.479110209128 0.000630232519721 0.00391678850582
ros 1000 40 0.75 0.485750803816 0.000475292297315 0.00573167715596
ros 400 40 1.0 0.434629979702 0.00153374875499 0.0044439700398
ros 500 40 1.0 0.441920201067 0.00108722226358 0.00210137169573
ros 550 40 1.0 0.445465825193 0.000962644554946 0.00280337726609
ros 600 40 1.0 0.448711116902 0.00103030163743 0.00325113530905
ros 700 40 1.0 0.453524086675 0.000849626928092 0.00395986688269
ros 800 40 1.0 0.459034383389 0.000719016618416 0.0033420371916
ros 900 40 1.0 0.464130015541 0.000706668071458 0.00259767783207
ros 1000 40 1.0 0.46890066838 0.00053933324236 0.00396774846868
ros 400 40 1.5 0.427307832635 0.00170025183929 0.000712542166764
ros 500 40 1.5 0.434683347759 0.00122622938804 0.00579837201447
ros 550 40 1.5 0.437116566722 0.00109619570754 0.000476174603998
ros 600 40 1.5 0.438875136111 0.00118789957242 0.00437146855597
ros 700 40 1.5 0.442765736233 0.000986774342799 0.00257300505259
ros 800 40 1.5 0.446465763724 0.000844150384587 0.0019816194299
ros 900 40 1.5 0.449816197379 0.000834998114867 0.00133014348906
ros 1000 40 1.5 0.453320579323 0.000641246889629 0.00230028854461
ros 400 40 2.0 0.425692655894 0.00186941280749 0.00340222355526
ros 500 40 2.0 0.430374576505 0.0013653273446 0.000476843042802
ros 550 40 2.0 0.432608930814 0.00122249986481 0.00254907629545
ros 600 40 2.0 0.434559897565 0.00132179706264 0.00471933374831
ros 700 40 2.0 0.437496121253 0.00110376489296 0.00206899904672
ros 800 40 2.0 0.440247009929 0.000948389100259 0.000977946840151
ros 900 40 2.0 0.442614371955 0.000939252031173 0.00167523490723
ros 1000 40 2.0 0.445273972616 0.000726125175125 0.00166427458528
ros 400 40 2.5 0.422065044743 0.00203745503071 0.00117577721517
ros 500 40 2.5 0.428325065656 0.0014794107091 0.00190827835594
ros 550 40 2.5 0.429509346269 0.00132779367149 0.00189882489782
ros 600 40 2.5 0.431214831063 0.00143606026578 0.00215473907677
ros 700 40 2.5 0.433864505319 0.00120491906871 0.00200955904727
ros 800 40 2.5 0.436573664898 0.00103639993797 0.00183082780725
ros 900 40 2.5 0.438422304193 0.00103360627738 0.00371846316957
ros 1000 40 2.5 0.440471857799 0.000799976149589 0.00239816417412
ros 400 40 3.0 0.420714929493 0.0021526602772 0.00319363507209
ros 500 40 3.0 0.425790657097 0.00157666876644 0.00120895901356
ros 550 40 3.0 0.427832611657 0.0014175987958 0.0025297756212
ros 600 40 3.0 0.429460405815 0.00153779081319 0.00103606081134
ros 700 40 3.0 0.431709386582 0.00129071800001 0.000993485429421
ros 800 40 3.0 0.433926654275 0.00111327104084 0.000752924476228
ros 900 40 3.0 0.435381495607 0.00111432352062 0.00101836844107
ros 1000 40 3.0 0.4373922249 0.000861465325674 0.00164772069992
ros 400 40 4.0 0.418068344888 0.00233945687838 0.00333917009261
ros 500 40 4.0 0.423479259368 0.00173702373285 0.00347697031815
ros 550 40 4.0 0.424388786089 0.00156209493223 0.00387058042697
ros 600 40 4.0 0.425856902473 0.00169843456011 0.000481151035689
ros 700 40 4.0 0.428487512547 0.00143385401378 0.00719115434312
ros 800 40 4.0 0.429926800239 0.00124945126695 0.00497627408167
ros 900 40 4.0 0.431242176603 0.00124711938464 0.00223754088814
ros 1000 40 4.0 0.432886382175 0.000966793804529 0.00365683157939
ros 400 40 5.0 0.416478644573 0.00247767002816 0.00723076662651
ros 500 40 5.0 0.421175666952 0.00183316422793 0.00518051308859
ros 550 40 5.0 0.423003610094 0.00167310774171 0.00669331029891
ros 600 40 5.0 0.423980854066 0.0018113811235 0.00695679395325
ros 700 40 5.0 0.425518717572 0.00153912287715 0.00442777882454
ros 800 40 5.0 0.4263696339 0.00135058343585 0.00510574426879
ros 900 40 5.0 0.427806770708 0.00135660640559 0.00359394627728
ros 1000 40 5.0 0.429821531401 0.00105416385965 0.00438262541861
ros 400 50 0.266 0.504853156914 0.00172699142352 0.00953848127182
ros 500 50 0.266 0.531075006697 0.00109240665262 0.0110803247794
ros 550 50 0.266 0.5427121088 0.000913382679781 0.0122905010515
ros 600 50 0.266 0.553064836393 0.000928005925556 0.0126143705867
ros 700 50 0.266 0.572708529816 0.000689644787166 0.0145268112504
ros 800 50 0.266 0.591484501956 0.000531578339079 0.013745224996
ros 900 50 0.266 0.608406851604 0.000481607387064 0.0142486496058
ros 1000 50 0.266 0.624185212563 0.000342394233226 0.0150232941379
ros 400 50 0.375 0.453411742061 0.00196703558285 0.00364646557408
ros 500 50 0.375 0.470978112208 0.00128713742739 0.0018749592648
ros 550 50 0.375 0.478351757299 0.00109792471266 0.0047415280679
ros 600 50 0.375 0.485456169637 0.00113490502166 0.00566884495742
ros 700 50 0.375 0.499602795914 0.000870685438086 0.00433526899448
ros 800 50 0.375 0.512977819411 0.00069215341545 0.00386810525206
ros 900 50 0.375 0.525300539233 0.000640633771606 0.0039700793852
ros 1000 50 0.375 0.538022381857 0.000462768362421 0.00267855940986
ros 400 50 0.5 0.438396238345 0.00203886163632 0.00412384467849
ros 500 50 0.5 0.451374335441 0.00135527246174 0.00354788001772
ros 550 50 0.5 0.456797734664 0.0011595228711 0.00281614135267
ros 600 50 0.5 0.462523571805 0.00120425529564 0.00345783884331
ros 700 50 0.5 0.471898827866 0.000941885636547 0.00441797480067
ros 800 50 0.5 0.481109459444 0.000763247717459 0.00492341234137
ros 900 50 0.5 0.489923540711 0.000720107713187 0.00506557412342
ros 1000 50 0.5 0.49826390752 0.000530483694613 0.00592915336185
ros 400 50 0.75 0.427330652549 0.0021214263583 0.00317236427563
ros 500 50 0.75 0.437183144635 0.00143118890715 0.00386467535537
ros 550 50 0.75 0.441379567539 0.00123858552473 0.000890656750897
ros 600 50 0.75 0.444628396533 0.0013003561207 0.0028769747533
ros 700 50 0.75 0.451138778522 0.00103063426006 0.00281850160435
ros 800 50 0.75 0.456904632581 0.000850834045036 0.00388823312249
ros 900 50 0.75 0.46244970207 0.000816814844384 0.00371568667655
ros 1000 50 0.75 0.467910107248 0.000610830901709 0.00418457364189
ros 400 50 1.0 0.422297437587 0.00221936956001 0.00581817645781
ros 500 50 1.0 0.430174753857 0.00151379858541 0.00129559908002
ros 550 50 1.0 0.434249831375 0.00131331681357 0.00265816220495
ros 600 50 1.0 0.436662061621 0.00138555639512 0.00291554647457
ros 700 50 1.0 0.441767311089 0.00111323044573 0.00347915354492
ros 800 50 1.0 0.446720323595 0.000923148313723 0.00298125758615
ros 900 50 1.0 0.450879267989 0.000895022223887 0.00284435748746
ros 1000 50 1.0 0.454885604549 0.000676504262888 0.00308068692089
ros 400 50 1.5 0.416387314153 0.00240876330545 0.00919432323952
ros 500 50 1.5 0.424466225694 0.00166510905138 0.000211971105077
ros 550 50 1.5 0.426488738244 0.00146953646353 0.00125496047972
ros 600 50 1.5 0.430212982283 0.00155324495905 0.00405998707037
ros 700 50 1.5 0.433371816246 0.00126618700909 0.00279016989575
ros 800 50 1.5 0.436850086033 0.00106558711922 0.00470440231393
ros 900 50 1.5 0.439881965617 0.00104015811886 0.000686916739394
ros 1000 50 1.5 0.442602681852 0.000790501120606 0.00182168232916
ros 400 50 2.0 0.41452948484 0.00259562611504 0.0073921637054
ros 500 50 2.0 0.420922247863 0.0018444432343 0.00649483431556
ros 550 50 2.0 0.42359480731 0.00162273075561 0.00184425513773
ros 600 50 2.0 0.425897563439 0.00173520932677 0.00241064691387
ros 700 50 2.0 0.429092759575 0.00141005636678 0.00194736974174
ros 800 50 2.0 0.431698547741 0.00118960894237 0.00308142015684
ros 900 50 2.0 0.433758858937 0.0011628027178 0.00116138508009
ros 1000 50 2.0 0.43651866085 0.000886216442798 0.0020589875359
ros 400 50 2.5 0.41218406428 0.00285573053969 0.00354926124982
ros 500 50 2.5 0.419630328116 0.00197735584774 0.00439256176507
ros 550 50 2.5 0.421054246993 0.00176051381064 0.00368646406358
ros 600 50 2.5 0.424199798352 0.00187500427167 0.00138260075942
ros 700 50 2.5 0.426112548174 0.00153803205058 0.00268241499557
ros 800 50 2.5 0.428976510636 0.00129379046556 0.00108658051185
ros 900 50 2.5 0.430899615881 0.00127070359178 0.00104118130539
ros 1000 50 2.5 0.432939763544 0.0009697930636 0.000849735043536
ros 400 50 3.0 0.410435077107 0.00303919491412 0.00396243052568
ros 500 50 3.0 0.41809357494 0.00211584371169 0.00411840061168
ros 550 50 3.0 0.420047861366 0.00187647472998 0.00355937053493
ros 600 50 3.0 0.421491361803 0.00199932842186 0.00425726209537
ros 700 50 3.0 0.423932264704 0.00163609193164 0.00171911160958
ros 800 50 3.0 0.426747334642 0.00138154809206 0.00498977032666
ros 900 50 3.0 0.428283970308 0.00135995646733 0.00153782220398
ros 1000 50 3.0 0.429876837451 0.00104324700095 0.00244895702749
ros 400 50 4.0 0.409941054025 0.00322268320652 0.0100389442807
ros 500 50 4.0 0.415181258796 0.00230790406211 0.00242453998476
ros 550 50 4.0 0.417518708468 0.00205082512329 0.00350805322848
ros 600 50 4.0 0.41885089281 0.00218280646612 0.000981836560197
ros 700 50 4.0 0.421073352724 0.00179729700311 0.00399002291268
ros 800 50 4.0 0.423742392788 0.00152819545874 0.00448321529007
ros 900 50 4.0 0.425479819529 0.00150665382479 0.00398667251255
ros 1000 50 4.0 0.426308472679 0.00115878274053 0.00347990200489
ros 400 50 5.0 0.407134178932 0.00342379809103 0.00801631687514
ros 500 50 5.0 0.412972402615 0.00244448984698 0.00529904451991
ros 550 50 5.0 0.41495922791 0.00216077534889 0.00476110744173
ros 600 50 5.0 0.416444323363 0.00232302805855 0.0077734759327
ros 700 50 5.0 0.419006823398 0.00193036196618 0.00621081334337
ros 800 50 5.0 0.420529716081 0.00164787181224 0.00467611641923
ros 900 50 5.0 0.421955449253 0.00162508250187 0.00311966620642
ros 1000 50 5.0 0.423407398736 0.00125319465918 0.00399338338997
ros 400 60 0.266 0.480421226313 0.00254290562875 0.00798327194397
ros 500 60 0.266 0.506766695896 0.00157190821037 0.0114064278539
ros 550 60 0.266 0.517123861725 0.00131730771039 0.0101440568469
ros 600 60 0.266 0.52791433174 0.0013212954252 0.0109417128418
ros 700 60 0.266 0.546481204031 0.000973832121353 0.0130406519888
ros 800 60 0.266 0.562881173874 0.000750542383326 0.0136698754973
ros 900 60 0.266 0.578869438432 0.000670654916065 0.0132025371159
ros 1000 60 0.266 0.593401592795 0.00047184303674 0.013662694059
ros 400 60 0.375 0.435206813984 0.00280106718905 0.0063023832424
ros 500 60 0.375 0.452245781161 0.00180432801338 0.0030966227519
ros 550 60 0.375 0.460023513984 0.00152334637338 0.00385490343707
ros 600 60 0.375 0.466794161417 0.00156741871065 0.00374604504032
ros 700 60 0.375 0.479256742661 0.00118568032725 0.00507850931704
ros 800 60 0.375 0.491010003541 0.000937094836523 0.00496441073748
ros 900 60 0.375 0.502048275451 0.000860322996787 0.00492223101309
ros 1000 60 0.375 0.512981295359 0.000617725899993 0.00369644767397
ros 400 60 0.5 0.423601537349 0.0028787300872 0.00285563430694
ros 500 60 0.5 0.437650560903 0.00186479962263 0.00125712476258
ros 550 60 0.5 0.442511773842 0.0015826541724 0.00211169835377
ros 600 60 0.5 0.446994959784 0.00163834931686 0.00444682236558
ros 700 60 0.5 0.456507194211 0.00125932719499 0.00541241345684
ros 800 60 0.5 0.465361925552 0.00100354868946 0.00405489032398
ros 900 60 0.5 0.472724021737 0.000936086715208 0.00508986441968
ros 1000 60 0.5 0.480132874414 0.000684018516162 0.00509911089897
ros 400 60 0.75 0.414568630287 0.00299655891775 0.00418592813108
ros 500 60 0.75 0.424520374436 0.00197223150704 0.003230305694
ros 550 60 0.75 0.429225062183 0.00167158878229 0.00253137563962
ros 600 60 0.75 0.433360968149 0.00173949557163 0.00459250655111
ros 700 60 0.75 0.439537238126 0.00135057559146 0.00480393357005
ros 800 60 0.75 0.445475453626 0.00109200185407 0.00330937534821
ros 900 60 0.75 0.450575991481 0.00103118884665 0.00362226213106
ros 1000 60 0.75 0.455137103313 0.000763264315982 0.00380319039244
ros 400 60 1.0 0.409310130469 0.00312606271156 0.000910629490039
ros 500 60 1.0 0.419758064934 0.0020478080055 0.00202750450797
ros 550 60 1.0 0.423873959704 0.00175467849422 0.000502743537272
ros 600 60 1.0 0.426994010272 0.00182401950484 0.0038761695082
ros 700 60 1.0 0.432030238133 0.00143212113407 0.00537294375677
ros 800 60 1.0 0.437240538047 0.00116600153386 0.00210482499442
ros 900 60 1.0 0.441155339493 0.00111386852955 0.00293053811518
ros 1000 60 1.0 0.444818067784 0.000830045322213 0.00280408392922
ros 400 60 1.5 0.404814430123 0.0033112970798 0.0063307538906
ros 500 60 1.5 0.414949351329 0.00221976861409 0.00207050621789
ros 550 60 1.5 0.418193367335 0.00191522678296 0.00108416587588
ros 600 60 1.5 0.421311076985 0.00200496654044 0.000417226972159
ros 700 60 1.5 0.42555392819 0.00159417471708 0.00199418219369
ros 800 60 1.5 0.428674320948 0.00132658981586 0.00259582417763
ros 900 60 1.5 0.432072571268 0.00127257612382 0.00150674697584
ros 1000 60 1.5 0.434617305861 0.000955744319332 0.00132323113111
ros 400 60 2.0 0.403420913863 0.00354083235702 0.00292133314509
ros 500 60 2.0 0.412213794243 0.00241318848192 0.00220785033117
ros 550 60 2.0 0.415014161746 0.00210568260867 0.00181864044742
ros 600 60 2.0 0.417506616849 0.00221225766181 0.000934869183763
ros 700 60 2.0 0.421990717558 0.00176834568838 0.00208499728072
ros 800 60 2.0 0.425015311832 0.0014719220027 0.00199999238576
ros 900 60 2.0 0.427268148486 0.00141739279182 0.00110103614686
ros 1000 60 2.0 0.429192628411 0.00106997865259 0.00231393684166
ros 400 60 2.5 0.402025946216 0.0038014999648 0.00569990651853
ros 500 60 2.5 0.410466956792 0.00261646243616 0.000970031666733
ros 550 60 2.5 0.414065948351 0.00226871751912 0.0026695748968
ros 600 60 2.5 0.416181692016 0.00242164291909 0.0021880272234
ros 700 60 2.5 0.419793880525 0.00192052787416 0.00100305357041
ros 800 60 2.5 0.422795829628 0.00158934459823 0.00360788168545
ros 900 60 2.5 0.424390572968 0.00154162755842 0.00191623661535
ros 1000 60 2.5 0.426228352501 0.00116220819623 0.00265841368006
ros 400 60 3.0 0.3992475605 0.00419309742352 0.00298641425314
ros 500 60 3.0 0.409164201767 0.0027641927411 0.00191092594468
ros 550 60 3.0 0.412034535869 0.00241825176158 0.00610614089374
ros 600 60 3.0 0.415047330162 0.00253868945333 0.00210811957733
ros 700 60 3.0 0.417168513277 0.00205963618804 0.00389845487785
ros 800 60 3.0 0.420036223831 0.00170170835857 0.00410974459981
ros 900 60 3.0 0.422458836446 0.0016461851037 0.00221011219325
ros 1000 60 3.0 0.424327498389 0.00124172500032 0.00231774064354
ros 400 60 4.0 0.398399048115 0.00436086899496 0.0106125728255
ros 500 60 4.0 0.40673448801 0.00302850445089 0.00467113303288
ros 550 60 4.0 0.41024978537 0.00263090485864 0.00381409608836
ros 600 60 4.0 0.412614906854 0.00275813041952 0.00476188978565
ros 700 60 4.0 0.41537287999 0.00224350459903 0.00272101082957
ros 800 60 4.0 0.417804112858 0.00186369618502 0.00975770480157
ros 900 60 4.0 0.419504774317 0.00181384194679 0.00148539201673
ros 1000 60 4.0 0.420670694366 0.00137869668975 0.00887818291203
ros 400 60 5.0 0.396186352352 0.0047895698088 0.00572927058787
ros 500 60 5.0 0.405821947907 0.00320016761475 0.00591871961231
ros 550 60 5.0 0.408066170174 0.00276198667919 0.00638033006291
ros 600 60 5.0 0.411440055277 0.00288750852046 0.00686295601455
ros 700 60 5.0 0.413042288201 0.00239279592122 0.00866719418741
ros 800 60 5.0 0.416042638899 0.0019872422959 0.0119752401382
ros 900 60 5.0 0.417143585569 0.00195232692179 0.00308860863473
ros 1000 60 5.0 0.41829270593 0.00148385613553 0.00764141174106
ros 400 70 0.266 0.458010846547 0.00359396824815 0.00817727729961
ros 500 70 0.266 0.485407815994 0.00217342123382 0.00994251375531
ros 550 70 0.266 0.49631423061 0.00180500548628 0.00977801240107
ros 600 70 0.266 0.506986539789 0.00180399026812 0.0100608030162
ros 700 70 0.266 0.524452104351 0.00132705742388 0.0125745800244
ros 800 70 0.266 0.540674595536 0.00101315308199 0.0129423898408
ros 900 70 0.266 0.555884281987 0.000899468618043 0.0115044166478
ros 1000 70 0.266 0.569634685783 0.000626950557629 0.013120343275
ros 400 70 0.375 0.416892627924 0.00393182136227 0.00352350767129
ros 500 70 0.375 0.436914732499 0.00244099552009 0.00369528920173
ros 550 70 0.375 0.444220049262 0.00205112022419 0.00311243566004
ros 600 70 0.375 0.450421035678 0.00208774311793 0.00522154205441
ros 700 70 0.375 0.46307869799 0.00156549382958 0.00634239625029
ros 800 70 0.375 0.474277489587 0.00122391974004 0.00517416272859
ros 900 70 0.375 0.484551858291 0.00111411681831 0.00537475306317
ros 1000 70 0.375 0.494127184564 0.00079419901939 0.0044599126189
ros 400 70 0.5 0.409081137092 0.00399175601771 0.0079724732249
ros 500 70 0.5 0.423951963478 0.00250019196459 0.00167802884139
ros 550 70 0.5 0.429542146345 0.00211888170476 0.00205445808903
ros 600 70 0.5 0.434802906418 0.00216614237012 0.00369804625692
ros 700 70 0.5 0.445054886703 0.00162448232093 0.00340605791248
ros 800 70 0.5 0.452731089082 0.00128614523903 0.00422590153388
ros 900 70 0.5 0.460134932388 0.00118575745837 0.00397987883305
ros 1000 70 0.5 0.466277190834 0.000859520962758 0.00499133914318
ros 400 70 0.75 0.399139571874 0.00415220077954 0.00152555733144
ros 500 70 0.75 0.413755939744 0.00260923192815 0.00114107215541
ros 550 70 0.75 0.419921507673 0.00220374196668 0.000751976882279
ros 600 70 0.75 0.423211099 0.00225683167009 0.00339988130296
ros 700 70 0.75 0.429978938815 0.00173144036958 0.00453737825669
ros 800 70 0.75 0.43665713055 0.00137120572031 0.00320400254272
ros 900 70 0.75 0.441521157889 0.0012797484377 0.00295526271297
ros 1000 70 0.75 0.44547348941 0.000938447410153 0.00365870262349
ros 400 70 1.0 0.397133339094 0.00422710661275 0.00947852102287
ros 500 70 1.0 0.41014817924 0.00269435930574 0.000131149109874
ros 550 70 1.0 0.413871383074 0.00229684093776 0.00160850356134
ros 600 70 1.0 0.418539473815 0.00235566776023 0.00490840604681
ros 700 70 1.0 0.424135173878 0.00181805085028 0.00349515764444
ros 800 70 1.0 0.429254683558 0.00145485282437 0.00246791767026
ros 900 70 1.0 0.433173848327 0.00136808072803 0.00291538457203
ros 1000 70 1.0 0.436472338566 0.00100872832267 0.003265105005
ros 400 70 1.5 0.393647399196 0.00447107502529 0.00609978847626
ros 500 70 1.5 0.406011933144 0.0028830228381 0.00182423665173
ros 550 70 1.5 0.409836390841 0.00246212620338 0.000928430482976
ros 600 70 1.5 0.411407832292 0.00260118109054 0.00822712884273
ros 700 70 1.5 0.417793489864 0.00199692178185 0.00458189999645
ros 800 70 1.5 0.422056056513 0.00162237070761 0.00499051515304
ros 900 70 1.5 0.425713715722 0.00153419929467 0.00224507398714
ros 1000 70 1.5 0.427918578923 0.00114674923748 0.00259473345121
ros 400 70 2.0 0.391351163679 0.00476309079339 0.00989382527199
ros 500 70 2.0 0.402982418818 0.00311601366482 0.0043350008664
ros 550 70 2.0 0.406966598105 0.00268088638776 0.00402581769488
ros 600 70 2.0 0.410918790347 0.00278531110556 0.00913782783018
ros 700 70 2.0 0.415143363814 0.00219788876584 0.00106296132648
ros 800 70 2.0 0.418303647919 0.00179488335384 0.00447028660048
ros 900 70 2.0 0.421801803417 0.00170615327239 0.00519313780149
ros 1000 70 2.0 0.4236771201 0.00127565996181 0.00221202913595
ros 400 70 2.5 0.388935669687 0.0050899043045 0.00151053724539
ros 500 70 2.5 0.401814050651 0.00335681204783 0.0039691257683
ros 550 70 2.5 0.405968682817 0.00290379948489 0.002921480546
ros 600 70 2.5 0.408869656105 0.00301286777635 0.00227263042551
ros 700 70 2.5 0.412294260827 0.00239720117439 0.00347897587246
ros 800 70 2.5 0.416555895943 0.00195071654205 0.00588086273597
ros 900 70 2.5 0.418136816119 0.00186396438637 0.00609214914068
ros 1000 70 2.5 0.42074391598 0.00138142336232 0.000642768552852
ros 400 70 3.0 0.387277376594 0.00556803444235 0.00387398065557
ros 500 70 3.0 0.401023088241 0.00360884466289 0.0045613589686
ros 550 70 3.0 0.403904550686 0.00310773949816 0.00645727501208
ros 600 70 3.0 0.407803410414 0.00320065900626 0.00442333842267
ros 700 70 3.0 0.411550194369 0.00252460241851 0.00658820666494
ros 800 70 3.0 0.41533456237 0.0020652356708 0.00255495966292
ros 900 70 3.0 0.416924687019 0.00198327796101 0.00163230027986
ros 1000 70 3.0 0.419434402291 0.00147255602227 0.00341793198511
ros 400 70 4.0 0.387301064784 0.00591817693747 0.00611273405952
ros 500 70 4.0 0.399795806298 0.00382966930131 0.00822485875719
ros 550 70 4.0 0.404289789062 0.00331416185916 0.00669728355421
ros 600 70 4.0 0.405059518337 0.00351092602172 0.00765563859872
ros 700 70 4.0 0.409946429679 0.00275767715692 0.00417196603943
ros 800 70 4.0 0.41277662794 0.00225390902028 0.00444061403955
ros 900 70 4.0 0.414268323989 0.0021659132775 0.00566458503096
ros 1000 70 4.0 0.416223215189 0.00162713120138 0.00170446616765
ros 400 70 5.0 0.383152359372 0.00630853935129 0.00431326572137
ros 500 70 5.0 0.397735510458 0.00417376479493 0.00809145613156
ros 550 70 5.0 0.401390999017 0.00350394855155 0.00815699439813
ros 600 70 5.0 0.403523128079 0.00374657787666 0.00356726558618
ros 700 70 5.0 0.406892819017 0.00292339840824 0.00963536743063
ros 800 70 5.0 0.410946880192 0.00239698192235 0.00388852851843
ros 900 70 5.0 0.411698803332 0.00234246490435 0.0108054000734
ros 1000 70 5.0 0.414572229038 0.00173467097024 0.00389382550802
ros 400 80 0.266 0.437407501999 0.00491137929533 0.00801559778301
ros 500 80 0.266 0.466233279472 0.00291025993818 0.00805750740977
ros 550 80 0.266 0.47872689528 0.00238996821527 0.0101954074358
ros 600 80 0.266 0.488788365745 0.00238483451253 0.00971397866326
ros 700 80 0.266 0.506488144354 0.00173180939773 0.0105646662202
ros 800 80 0.266 0.522681068973 0.00131315772555 0.0119410458346
ros 900 80 0.266 0.536359127492 0.00117016046174 0.0143751401998
ros 1000 80 0.266 0.549820881177 0.000812314878488 0.0134663884747
ros 400 80 0.375 0.401609234098 0.00525836031497 0.00608768107199
ros 500 80 0.375 0.423223143539 0.00318702599049 0.00517540557404
ros 550 80 0.375 0.430053008285 0.00268045135373 0.00329886131078
ros 600 80 0.375 0.436789629275 0.00272349646025 0.00621595883547
ros 700 80 0.375 0.449780454097 0.0019975505152 0.00498476415426
ros 800 80 0.375 0.460158889084 0.00155275052463 0.00595722848854
ros 900 80 0.375 0.470115511844 0.00140699508992 0.00596543872497
ros 1000 80 0.375 0.479214942512 0.00099836746767 0.0050785364169
ros 400 80 0.5 0.392433840564 0.00538194366783 0.00881580565589
ros 500 80 0.5 0.410437397586 0.00332162690277 0.00385277614534
ros 550 80 0.5 0.41766963865 0.00275571669506 0.00707390811005
ros 600 80 0.5 0.423976077695 0.00277043672178 0.00300373281497
ros 700 80 0.5 0.43350821808 0.00207070743981 0.00484713735118
ros 800 80 0.5 0.441470067449 0.00162348609798 0.00480629301688
ros 900 80 0.5 0.448270303864 0.00148478779525 0.0066799210439
ros 1000 80 0.5 0.455760745826 0.00105954804809 0.00415973445952
ros 400 80 0.75 0.385066115288 0.00555949514402 0.00431903324972
ros 500 80 0.75 0.402918283528 0.00340724983521 0.00215304150351
ros 550 80 0.75 0.408031523267 0.00286894215464 0.00108497101967
ros 600 80 0.75 0.413369831938 0.00288429857137 0.00314559106136
ros 700 80 0.75 0.421024276723 0.00219036466802 0.00402519270433
ros 800 80 0.75 0.427130337093 0.00172162009164 0.00610062187402
ros 900 80 0.75 0.432482696138 0.00158056154993 0.00458764683644
ros 1000 80 0.75 0.437132674647 0.00114229681661 0.00507204784872
ros 400 80 1.0 0.383049055044 0.0056791089018 0.00117027202298
ros 500 80 1.0 0.400151537611 0.00350122264679 0.0041345196007
ros 550 80 1.0 0.405186968583 0.00294178124972 0.000574536735299
ros 600 80 1.0 0.40977136748 0.00301419831896 0.00190756187658
ros 700 80 1.0 0.415891389442 0.00228049054344 0.00336605822925
ros 800 80 1.0 0.421773744828 0.00180304810031 0.00334537261096
ros 900 80 1.0 0.42652731385 0.00166229633079 0.00218872792713
ros 1000 80 1.0 0.429433968375 0.00121620055906 0.00421608853657
ros 400 80 1.5 0.379334918556 0.00602623677374 0.00443087528712
ros 500 80 1.5 0.395293352588 0.00372020904906 0.00344168755665
ros 550 80 1.5 0.399644190468 0.00316586189974 0.00213914301018
ros 600 80 1.5 0.404808563299 0.00320550597371 0.00489078738644
ros 700 80 1.5 0.411090280949 0.0024620903521 0.00199935684692
ros 800 80 1.5 0.416124918766 0.00196894014203 0.00301202297927
ros 900 80 1.5 0.419003399341 0.00184534010839 0.00399443994976
ros 1000 80 1.5 0.422657405748 0.00135584871534 0.00308360543935
ros 400 80 2.0 0.380002528112 0.00622672159677 0.00893805485849
ros 500 80 2.0 0.392306214992 0.00399299020043 0.00428882604898
ros 550 80 2.0 0.398414890449 0.00338524642335 0.00200466119107
ros 600 80 2.0 0.402021301383 0.0035039658377 0.00182738772558
ros 700 80 2.0 0.408398325526 0.00268449718217 0.00571629566517
ros 800 80 2.0 0.412700600003 0.00217099493725 0.00729212391087
ros 900 80 2.0 0.416586702017 0.00204617285253 0.00673649155754
ros 1000 80 2.0 0.418280105897 0.00151013444228 0.00520159891247
ros 400 80 2.5 0.377155489552 0.00668651483952 0.00468323750236
ros 500 80 2.5 0.392299464308 0.00426798697836 0.00164835026243
ros 550 80 2.5 0.397416573314 0.00362689229403 0.00465795188925
ros 600 80 2.5 0.400419899595 0.00376822427246 0.000952759288735
ros 700 80 2.5 0.405906632506 0.00290728044144 0.00451476878639
ros 800 80 2.5 0.410455339071 0.00237571211283 0.00252481215248
ros 900 80 2.5 0.413305826096 0.00221049022463 0.00511839250065
ros 1000 80 2.5 0.41622453385 0.00163809892606 0.00346230077527
ros 400 80 3.0 0.374336467833 0.00713692232561 0.00169779315843
ros 500 80 3.0 0.39191468125 0.00450695840652 0.00485071827492
ros 550 80 3.0 0.396392716144 0.00388659884776 0.00792674449412
ros 600 80 3.0 0.400590256453 0.00397603940765 0.00549332690385
ros 700 80 3.0 0.406180032066 0.00308104850905 0.00195336132299
ros 800 80 3.0 0.408999020659 0.00250001559651 0.00480795256776
ros 900 80 3.0 0.413212453454 0.00237067751174 0.000861518400651
ros 1000 80 3.0 0.414630586912 0.00173200141212 0.00150299198397
ros 400 80 4.0 0.373234281745 0.00815441921768 0.00446889961952
ros 500 80 4.0 0.389754573471 0.00483870077914 0.00664867013552
ros 550 80 4.0 0.394814636012 0.00415887454739 0.00433434754368
ros 600 80 4.0 0.397876441546 0.00435391264304 0.00204535943678
ros 700 80 4.0 0.402407583928 0.00342444264793 0.00813938573156
ros 800 80 4.0 0.407069625305 0.00271185404141 0.00270614179441
ros 900 80 4.0 0.409748084188 0.00257036716782 0.00247173772843
ros 1000 80 4.0 0.412103230734 0.0019027502622 0.00167923916548
ros 400 80 5.0 0.370617462553 0.00844104808849 0.00276884489527
ros 500 80 5.0 0.386720835627 0.00536484578917 0.00856433209775
ros 550 80 5.0 0.392472596393 0.00453533817336 0.00610298150904
ros 600 80 5.0 0.395064940319 0.00466210170728 0.00557138266331
ros 700 80 5.0 0.401551716166 0.00352980481351 0.00807864531176
ros 800 80 5.0 0.405358801396 0.00289568116555 0.00706125159241
ros 900 80 5.0 0.4079779353 0.00274268530716 0.00606845292228
ros 1000 80 5.0 0.409151173744 0.00204081673329 0.00292925205351
ros 400 90 0.266 0.415875588728 0.00662066784961 0.0104863881749
ros 500 90 0.266 0.447702569893 0.00376679390908 0.00752968450048
ros 550 90 0.266 0.460228225264 0.00310709175877 0.00820341200695
ros 600 90 0.266 0.470378370231 0.00307038111108 0.0127389010986
ros 700 90 0.266 0.490120147886 0.00218766978501 0.012119271197
ros 800 90 0.266 0.505637106629 0.0016492156564 0.0124752882088
ros 900 90 0.266 0.520418515266 0.00146086486555 0.0133263672348
ros 1000 90 0.266 0.532839724398 0.00101011171739 0.0125367624176
ros 400 90 0.375 0.38297254791 0.00703519483883 0.0125570105849
ros 500 90 0.375 0.408916697001 0.00412880916294 0.00163961332133
ros 550 90 0.375 0.418380079381 0.00337175726683 0.0025554144884
ros 600 90 0.375 0.425454658686 0.00338088322225 0.00213764846372
ros 700 90 0.375 0.43814475841 0.00248445068196 0.00389597091354
ros 800 90 0.375 0.448734914129 0.00190822252377 0.00399716530066
ros 900 90 0.375 0.457625836988 0.00171757738371 0.00685626319838
ros 1000 90 0.375 0.466561641451 0.00121391258395 0.00656860697684
ros 400 90 0.5 0.375494565304 0.00718135417507 0.0138150056491
ros 500 90 0.5 0.397936284757 0.00429047555504 0.0047835475005
ros 550 90 0.5 0.406804979975 0.00347014002646 0.000469737048063
ros 600 90 0.5 0.414220859832 0.00346104644623 0.00229073783205
ros 700 90 0.5 0.423876040595 0.0025591405331 0.00547787409133
ros 800 90 0.5 0.432089858869 0.001986409617 0.00497561524477
ros 900 90 0.5 0.439502766959 0.00179215954711 0.00530687824389
ros 1000 90 0.5 0.445724126689 0.00127413567568 0.00578805991485
ros 400 90 0.75 0.371073711006 0.00730143496792 0.0104323483444
ros 500 90 0.75 0.39119885581 0.00436028970752 0.000701046840099
ros 550 90 0.75 0.398376169644 0.00360094850518 0.00193840877513
ros 600 90 0.75 0.405925239022 0.00357691696806 0.00914490712978
ros 700 90 0.75 0.413062530544 0.00269051334654 0.00301702851862
ros 800 90 0.75 0.419941521277 0.00208096943624 0.00347517578197
ros 900 90 0.75 0.425154025948 0.00189693844334 0.00573299673013
ros 1000 90 0.75 0.43058681181 0.00135929222167 0.00285717884181
ros 400 90 1.0 0.367540244928 0.00752458246363 0.0108711175482
ros 500 90 1.0 0.387164273438 0.00450091109243 0.00251247525926
ros 550 90 1.0 0.394106561721 0.00372476129762 0.00275432765685
ros 600 90 1.0 0.401799902273 0.0036869519871 0.0056292368321
ros 700 90 1.0 0.407710184934 0.00279871701876 0.0055829122706
ros 800 90 1.0 0.415893814352 0.00215600200743 0.00487354169812
ros 900 90 1.0 0.419064533017 0.00199736926447 0.00498957275247
ros 1000 90 1.0 0.423161342899 0.00143657762434 0.00476766756868
ros 400 90 1.5 0.364963406616 0.00793248382402 0.00159517299242
ros 500 90 1.5 0.38407773572 0.00472195108524 0.00467574055208
ros 550 90 1.5 0.390905778322 0.00393791128605 0.00309475588574
ros 600 90 1.5 0.395759648353 0.00399199647841 0.00373369311297
ros 700 90 1.5 0.404268927198 0.00299013699364 0.00615030960241
ros 800 90 1.5 0.409391503147 0.0023610666702 0.00408394556092
ros 900 90 1.5 0.413971840537 0.00218238616398 0.00198033466496
ros 1000 90 1.5 0.417067199534 0.00158575870987 0.00532303613143
ros 400 90 2.0 0.36300933711 0.00831158887718 0.00833730923172
ros 500 90 2.0 0.384108043685 0.00494342914512 0.00819214115256
ros 550 90 2.0 0.389379443477 0.00416287279458 0.00208587260503
ros 600 90 2.0 0.393488932061 0.00423992743753 0.00403284358824
ros 700 90 2.0 0.400775437643 0.00323078427786 0.00456850587596
ros 800 90 2.0 0.406904682315 0.00256894947502 0.002653069412
ros 900 90 2.0 0.411616642345 0.0023889328478 0.0044933463184
ros 1000 90 2.0 0.412882180525 0.00176976034672 0.00405296240121
ros 400 90 2.5 0.361516510412 0.00877931977216 0.0155687630414
ros 500 90 2.5 0.379805210581 0.0054142662071 0.012263346226
ros 550 90 2.5 0.389033808513 0.00445817990186 0.00709377532035
ros 600 90 2.5 0.393214008896 0.00453931085414 0.0100123586138
ros 700 90 2.5 0.400672987092 0.00346989153994 0.00649397686602
ros 800 90 2.5 0.40473883402 0.00280399089857 0.00394937624505
ros 900 90 2.5 0.408975765944 0.00259735185732 0.00933456216116
ros 1000 90 2.5 0.411915880591 0.00191318272021 0.00752332677625
ros 400 90 3.0 0.360253173731 0.00927351934445 0.00992499589829
ros 500 90 3.0 0.380422728152 0.00568364047194 0.00647821647049
ros 550 90 3.0 0.385403041308 0.00489900264475 0.00535445461649
ros 600 90 3.0 0.392781943496 0.00485128722375 0.0015386305176
ros 700 90 3.0 0.399172976371 0.00367308252446 0.00437642243359
ros 800 90 3.0 0.403815831354 0.0029511411991 0.00219226014277
ros 900 90 3.0 0.40647811624 0.00277678877387 0.00456685382971
ros 1000 90 3.0 0.40972359459 0.00202148926203 0.00447992678968
ros 400 90 4.0 0.358910091062 0.0103429053569 0.00236502451457
ros 500 90 4.0 0.379289642124 0.00615823754332 0.0119645525222
ros 550 90 4.0 0.385458949303 0.00520074807268 0.0085628132145
ros 600 90 4.0 0.389054912362 0.0054142674512 0.00743964542925
ros 700 90 4.0 0.398070195022 0.00402962859614 0.0021515922102
ros 800 90 4.0 0.401775310398 0.00319168360787 0.00713198255255
ros 900 90 4.0 0.405190078354 0.00304242793769 0.00545624721745
ros 1000 90 4.0 0.40765732378 0.00221270315084 0.00552031338771
ros 400 90 5.0 0.356621885896 0.0111069682911 0.00623448101738
ros 500 90 5.0 0.377389635322 0.00663342850225 0.00289519574962
ros 550 90 5.0 0.383751459579 0.00565338280197 0.0102631235071
ros 600 90 5.0 0.390185393747 0.00549125251356 0.0108643378147
ros 700 90 5.0 0.396484893516 0.00425258001209 0.00417263212313
ros 800 90 5.0 0.400442530916 0.00344620137806 0.00548723451288
ros 900 90 5.0 0.402598708946 0.00321183380387 0.00654364594072
ros 1000 90 5.0 0.406109860093 0.00232799667194 0.00503484086404
